# Supplementary material for: The landscape of tumors-infiltrate immune cells in papillary thyroid carcinoma and its prognostic value
Source: PeerJ. 2021 May 21;9:e11494. doi: 10.7717/peerj.11494 (PMC8142931; doi:10.7717/peerj.11494)
Supplement: Supplemental Information 5 [file peerj-09-11494-s005.xlsx]

## Sheet: S1
Table S1 28 types of tumor-infiltrate immune cells
Metagene	Cell type	Immunity
ADAM28	Activated B cell	Adaptive
CD180	Activated B cell	Adaptive
CD79B	Activated B cell	Adaptive
BLK	Activated B cell	Adaptive
CD19	Activated B cell	Adaptive
MS4A1	Activated B cell	Adaptive
TNFRSF17	Activated B cell	Adaptive
IGHM	Activated B cell	Adaptive
GNG7	Activated B cell	Adaptive
MICAL3	Activated B cell	Adaptive
SPIB	Activated B cell	Adaptive
HLA-DOB	Activated B cell	Adaptive
IGKC	Activated B cell	Adaptive
PNOC	Activated B cell	Adaptive
FCRL2	Activated B cell	Adaptive
BACH2	Activated B cell	Adaptive
CR2	Activated B cell	Adaptive
TCL1A	Activated B cell	Adaptive
AKNA	Activated B cell	Adaptive
ARHGAP25	Activated B cell	Adaptive
CCL21	Activated B cell	Adaptive
CD27	Activated B cell	Adaptive
CD38	Activated B cell	Adaptive
CLEC17A	Activated B cell	Adaptive
CLEC9A	Activated B cell	Adaptive
CLECL1	Activated B cell	Adaptive
AIM2	Activated CD4 T cell	Adaptive
BIRC3	Activated CD4 T cell	Adaptive
BRIP1	Activated CD4 T cell	Adaptive
CCL20	Activated CD4 T cell	Adaptive
CCL4	Activated CD4 T cell	Adaptive
CCL5	Activated CD4 T cell	Adaptive
CCNB1	Activated CD4 T cell	Adaptive
CCR7	Activated CD4 T cell	Adaptive
DUSP2	Activated CD4 T cell	Adaptive
ESCO2	Activated CD4 T cell	Adaptive
ETS1	Activated CD4 T cell	Adaptive
EXO1	Activated CD4 T cell	Adaptive
EXOC6	Activated CD4 T cell	Adaptive
IARS	Activated CD4 T cell	Adaptive
ITK	Activated CD4 T cell	Adaptive
KIF11	Activated CD4 T cell	Adaptive
KNTC1	Activated CD4 T cell	Adaptive
NUF2	Activated CD4 T cell	Adaptive
PRC1	Activated CD4 T cell	Adaptive
PSAT1	Activated CD4 T cell	Adaptive
RGS1	Activated CD4 T cell	Adaptive
RTKN2	Activated CD4 T cell	Adaptive
SAMSN1	Activated CD4 T cell	Adaptive
SELL	Activated CD4 T cell	Adaptive
TRAT1	Activated CD4 T cell	Adaptive
ADRM1	Activated CD8 T cell	Adaptive
AHSA1	Activated CD8 T cell	Adaptive
C1GALT1C1	Activated CD8 T cell	Adaptive
CCT6B	Activated CD8 T cell	Adaptive
CD37	Activated CD8 T cell	Adaptive
CD3D	Activated CD8 T cell	Adaptive
CD3E	Activated CD8 T cell	Adaptive
CD3G	Activated CD8 T cell	Adaptive
CD69	Activated CD8 T cell	Adaptive
CD8A	Activated CD8 T cell	Adaptive
CETN3	Activated CD8 T cell	Adaptive
CSE1L	Activated CD8 T cell	Adaptive
GEMIN6	Activated CD8 T cell	Adaptive
GNLY	Activated CD8 T cell	Adaptive
GPT2	Activated CD8 T cell	Adaptive
GZMA	Activated CD8 T cell	Adaptive
GZMH	Activated CD8 T cell	Adaptive
GZMK	Activated CD8 T cell	Adaptive
IL2RB	Activated CD8 T cell	Adaptive
LCK	Activated CD8 T cell	Adaptive
MPZL1	Activated CD8 T cell	Adaptive
NKG7	Activated CD8 T cell	Adaptive
PIK3IP1	Activated CD8 T cell	Adaptive
PTRH2	Activated CD8 T cell	Adaptive
TIMM13	Activated CD8 T cell	Adaptive
ZAP70	Activated CD8 T cell	Adaptive
ABHD3	Central memory CD4 T cell	Adaptive
AHNAK	Central memory CD4 T cell	Adaptive
ANXA2P2	Central memory CD4 T cell	Adaptive
AQP3	Central memory CD4 T cell	Adaptive
ATHL1	Central memory CD4 T cell	Adaptive
BMI1	Central memory CD4 T cell	Adaptive
BZW2	Central memory CD4 T cell	Adaptive
CD63	Central memory CD4 T cell	Adaptive
COL4A1	Central memory CD4 T cell	Adaptive
CYLD	Central memory CD4 T cell	Adaptive
ELMO2	Central memory CD4 T cell	Adaptive
FYN	Central memory CD4 T cell	Adaptive
GLIPR1	Central memory CD4 T cell	Adaptive
GSS	Central memory CD4 T cell	Adaptive
IFITM2	Central memory CD4 T cell	Adaptive
ITGB1	Central memory CD4 T cell	Adaptive
ITGB2	Central memory CD4 T cell	Adaptive
KLF5	Central memory CD4 T cell	Adaptive
LSP1	Central memory CD4 T cell	Adaptive
NDUFB9	Central memory CD4 T cell	Adaptive
PKM	Central memory CD4 T cell	Adaptive
SFXN3	Central memory CD4 T cell	Adaptive
SIRPG	Central memory CD4 T cell	Adaptive
SMAD4	Central memory CD4 T cell	Adaptive
STX4	Central memory CD4 T cell	Adaptive
TRADD	Central memory CD4 T cell	Adaptive
VIM	Central memory CD4 T cell	Adaptive
XRCC6	Central memory CD4 T cell	Adaptive
ACTN4	Central memory CD8 T cell	Adaptive
ADAM12	Central memory CD8 T cell	Adaptive
ADCY9	Central memory CD8 T cell	Adaptive
F13A1	Central memory CD8 T cell	Adaptive
FCER1G	Central memory CD8 T cell	Adaptive
FCGR3B	Central memory CD8 T cell	Adaptive
FGF7	Central memory CD8 T cell	Adaptive
FKBP4	Central memory CD8 T cell	Adaptive
GLUD1	Central memory CD8 T cell	Adaptive
GM2A	Central memory CD8 T cell	Adaptive
GUSB	Central memory CD8 T cell	Adaptive
IL1RN	Central memory CD8 T cell	Adaptive
NOL11	Central memory CD8 T cell	Adaptive
NTRK1	Central memory CD8 T cell	Adaptive
RARA	Central memory CD8 T cell	Adaptive
RNF128	Central memory CD8 T cell	Adaptive
SIGLEC1	Central memory CD8 T cell	Adaptive
TNFRSF11A	Central memory CD8 T cell	Adaptive
TOX4	Central memory CD8 T cell	Adaptive
UBA52	Central memory CD8 T cell	Adaptive
ULBP1	Central memory CD8 T cell	Adaptive
ATM	Effector memeory CD4 T cell	Adaptive
CASP3	Effector memeory CD4 T cell	Adaptive
CASQ1	Effector memeory CD4 T cell	Adaptive
CD300E	Effector memeory CD4 T cell	Adaptive
DARS	Effector memeory CD4 T cell	Adaptive
DOCK9	Effector memeory CD4 T cell	Adaptive
EXOSC9	Effector memeory CD4 T cell	Adaptive
EZH2	Effector memeory CD4 T cell	Adaptive
GDE1	Effector memeory CD4 T cell	Adaptive
IL34	Effector memeory CD4 T cell	Adaptive
NCOA4	Effector memeory CD4 T cell	Adaptive
NEFL	Effector memeory CD4 T cell	Adaptive
PDGFRL	Effector memeory CD4 T cell	Adaptive
PTGS1	Effector memeory CD4 T cell	Adaptive
REPS1	Effector memeory CD4 T cell	Adaptive
SCG2	Effector memeory CD4 T cell	Adaptive
SDPR	Effector memeory CD4 T cell	Adaptive
SIGLEC14	Effector memeory CD4 T cell	Adaptive
SIGLEC6	Effector memeory CD4 T cell	Adaptive
TAL1	Effector memeory CD4 T cell	Adaptive
TFEC	Effector memeory CD4 T cell	Adaptive
TIPIN	Effector memeory CD4 T cell	Adaptive
TPK1	Effector memeory CD4 T cell	Adaptive
UQCRB	Effector memeory CD4 T cell	Adaptive
USP9Y	Effector memeory CD4 T cell	Adaptive
WIPF1	Effector memeory CD4 T cell	Adaptive
ZCRB1	Effector memeory CD4 T cell	Adaptive
ACAP1	Effector memeory CD8 T cell	Adaptive
APOL3	Effector memeory CD8 T cell	Adaptive
ARHGAP10	Effector memeory CD8 T cell	Adaptive
ATP10D	Effector memeory CD8 T cell	Adaptive
C3AR1	Effector memeory CD8 T cell	Adaptive
CCR5	Effector memeory CD8 T cell	Adaptive
CD160	Effector memeory CD8 T cell	Adaptive
CD55	Effector memeory CD8 T cell	Adaptive
CFLAR	Effector memeory CD8 T cell	Adaptive
CMKLR1	Effector memeory CD8 T cell	Adaptive
DAPP1	Effector memeory CD8 T cell	Adaptive
FCRL6	Effector memeory CD8 T cell	Adaptive
FLT3LG	Effector memeory CD8 T cell	Adaptive
GZMM	Effector memeory CD8 T cell	Adaptive
HAPLN3	Effector memeory CD8 T cell	Adaptive
HLA-DMB	Effector memeory CD8 T cell	Adaptive
HLA-DPA1	Effector memeory CD8 T cell	Adaptive
HLA-DPB1	Effector memeory CD8 T cell	Adaptive
IFI16	Effector memeory CD8 T cell	Adaptive
LIME1	Effector memeory CD8 T cell	Adaptive
LTK	Effector memeory CD8 T cell	Adaptive
NFKBIA	Effector memeory CD8 T cell	Adaptive
SETD7	Effector memeory CD8 T cell	Adaptive
SIK1	Effector memeory CD8 T cell	Adaptive
TRIB2	Effector memeory CD8 T cell	Adaptive
ACP5	Gamma delta T cell	Adaptive
AQP9	Gamma delta T cell	Adaptive
BTN3A2	Gamma delta T cell	Adaptive
C1orf54	Gamma delta T cell	Adaptive
CARD8	Gamma delta T cell	Adaptive
CCL18	Gamma delta T cell	Adaptive
CD209	Gamma delta T cell	Adaptive
CD33	Gamma delta T cell	Adaptive
CD36	Gamma delta T cell	Adaptive
CDK5	Gamma delta T cell	Adaptive
IL10RB	Gamma delta T cell	Adaptive
KLRF1	Gamma delta T cell	Adaptive
LGALS1	Gamma delta T cell	Adaptive
MAPK7	Gamma delta T cell	Adaptive
KLHL7	Gamma delta T cell	Adaptive
KRT80	Gamma delta T cell	Adaptive
LAMC1	Gamma delta T cell	Adaptive
LCORL	Gamma delta T cell	Adaptive
LMNB1	Gamma delta T cell	Adaptive
MEIS3P1	Gamma delta T cell	Adaptive
MPL	Gamma delta T cell	Adaptive
FABP1	Gamma delta T cell	Adaptive
FABP5	Gamma delta T cell	Adaptive
FADD	Gamma delta T cell	Adaptive
MFAP3L	Gamma delta T cell	Adaptive
MINPP1	Gamma delta T cell	Adaptive
RPS24	Gamma delta T cell	Adaptive
RPS7	Gamma delta T cell	Adaptive
RPS9	Gamma delta T cell	Adaptive
DBNL	Gamma delta T cell	Adaptive
CCL13	Gamma delta T cell	Adaptive
CD22	Immature B cell	Adaptive
CYBB	Immature B cell	Adaptive
FAM129C	Immature B cell	Adaptive
FCRL1	Immature B cell	Adaptive
FCRL3	Immature B cell	Adaptive
FCRL5	Immature B cell	Adaptive
FCRLA	Immature B cell	Adaptive
HDAC9	Immature B cell	Adaptive
HLA-DQA1	Immature B cell	Adaptive
HVCN1	Immature B cell	Adaptive
KIAA0226	Immature B cell	Adaptive
NCF1	Immature B cell	Adaptive
NCF1B	Immature B cell	Adaptive
P2RY10	Immature B cell	Adaptive
SP100	Immature B cell	Adaptive
TXNIP	Immature B cell	Adaptive
STAP1	Immature B cell	Adaptive
TAGAP	Immature B cell	Adaptive
ZCCHC2	Immature B cell	Adaptive
AICDA	Memory B cell	Adaptive
CCNA2	Memory B cell	Adaptive
CDKN3	Memory B cell	Adaptive
CLCN5	Memory B cell	Adaptive
ENPP1	Memory B cell	Adaptive
FCER1A	Memory B cell	Adaptive
FCRL4	Memory B cell	Adaptive
MYC	Memory B cell	Adaptive
RUNX2	Memory B cell	Adaptive
SORL1	Memory B cell	Adaptive
SOX5	Memory B cell	Adaptive
STAT5A	Memory B cell	Adaptive
STAT5B	Memory B cell	Adaptive
TLR9	Memory B cell	Adaptive
CCL3L1	Regulatory T cell	Adaptive
CD72	Regulatory T cell	Adaptive
CLEC5A	Regulatory T cell	Adaptive
FOXP3	Regulatory T cell	Adaptive
ITGA4	Regulatory T cell	Adaptive
L1CAM	Regulatory T cell	Adaptive
LIPA	Regulatory T cell	Adaptive
LRP1	Regulatory T cell	Adaptive
LRRC42	Regulatory T cell	Adaptive
MARCO	Regulatory T cell	Adaptive
MMP12	Regulatory T cell	Adaptive
MNDA	Regulatory T cell	Adaptive
MRC1	Regulatory T cell	Adaptive
MS4A6A	Regulatory T cell	Adaptive
PELO	Regulatory T cell	Adaptive
PLEK	Regulatory T cell	Adaptive
PRSS23	Regulatory T cell	Adaptive
PTGIR	Regulatory T cell	Adaptive
ST8SIA4	Regulatory T cell	Adaptive
STAB1	Regulatory T cell	Adaptive
B3GAT1	T follicular helper cell	Adaptive
CDK5R1	T follicular helper cell	Adaptive
PDCD1	T follicular helper cell	Adaptive
BCL6	T follicular helper cell	Adaptive
CD200	T follicular helper cell	Adaptive
CD83	T follicular helper cell	Adaptive
CD84	T follicular helper cell	Adaptive
FGF2	T follicular helper cell	Adaptive
GPR18	T follicular helper cell	Adaptive
CEBPA	T follicular helper cell	Adaptive
CECR1	T follicular helper cell	Adaptive
CLEC10A	T follicular helper cell	Adaptive
CLEC4A	T follicular helper cell	Adaptive
CSF1R	T follicular helper cell	Adaptive
CTSS	T follicular helper cell	Adaptive
DMN	T follicular helper cell	Adaptive
DPP4	T follicular helper cell	Adaptive
LRRC32	T follicular helper cell	Adaptive
MC5R	T follicular helper cell	Adaptive
MICA	T follicular helper cell	Adaptive
NCAM1	T follicular helper cell	Adaptive
NCR2	T follicular helper cell	Adaptive
NRP1	T follicular helper cell	Adaptive
PDCD1LG2	T follicular helper cell	Adaptive
PDCD6	T follicular helper cell	Adaptive
PRDX1	T follicular helper cell	Adaptive
RAE1	T follicular helper cell	Adaptive
RAET1E	T follicular helper cell	Adaptive
SIGLEC7	T follicular helper cell	Adaptive
SIGLEC9	T follicular helper cell	Adaptive
TYRO3	T follicular helper cell	Adaptive
CHST12	T follicular helper cell	Adaptive
CLIC3	T follicular helper cell	Adaptive
IVNS1ABP	T follicular helper cell	Adaptive
KIR2DL2	T follicular helper cell	Adaptive
LGMN	T follicular helper cell	Adaptive
CD70	Type 1 T helper cell	Adaptive
TBX21	Type 1 T helper cell	Adaptive
ADAM8	Type 1 T helper cell	Adaptive
AHCYL2	Type 1 T helper cell	Adaptive
ALCAM	Type 1 T helper cell	Adaptive
B3GALNT1	Type 1 T helper cell	Adaptive
BBS12	Type 1 T helper cell	Adaptive
BST1	Type 1 T helper cell	Adaptive
CD151	Type 1 T helper cell	Adaptive
CD47	Type 1 T helper cell	Adaptive
CD48	Type 1 T helper cell	Adaptive
CD52	Type 1 T helper cell	Adaptive
CD53	Type 1 T helper cell	Adaptive
CD59	Type 1 T helper cell	Adaptive
CD6	Type 1 T helper cell	Adaptive
CD68	Type 1 T helper cell	Adaptive
CD7	Type 1 T helper cell	Adaptive
CD96	Type 1 T helper cell	Adaptive
CFHR3	Type 1 T helper cell	Adaptive
CHRM3	Type 1 T helper cell	Adaptive
CLEC7A	Type 1 T helper cell	Adaptive
COL23A1	Type 1 T helper cell	Adaptive
COL4A4	Type 1 T helper cell	Adaptive
COL5A3	Type 1 T helper cell	Adaptive
DAB1	Type 1 T helper cell	Adaptive
DLEU7	Type 1 T helper cell	Adaptive
DOC2B	Type 1 T helper cell	Adaptive
EMP1	Type 1 T helper cell	Adaptive
F12	Type 1 T helper cell	Adaptive
FURIN	Type 1 T helper cell	Adaptive
GAB3	Type 1 T helper cell	Adaptive
GATM	Type 1 T helper cell	Adaptive
GFPT2	Type 1 T helper cell	Adaptive
GPR25	Type 1 T helper cell	Adaptive
GREM2	Type 1 T helper cell	Adaptive
HAVCR1	Type 1 T helper cell	Adaptive
HSD11B1	Type 1 T helper cell	Adaptive
HUNK	Type 1 T helper cell	Adaptive
IGF2	Type 1 T helper cell	Adaptive
RCSD1	Type 1 T helper cell	Adaptive
RYR1	Type 1 T helper cell	Adaptive
SAV1	Type 1 T helper cell	Adaptive
SELE	Type 1 T helper cell	Adaptive
SELP	Type 1 T helper cell	Adaptive
SH3KBP1	Type 1 T helper cell	Adaptive
SIT1	Type 1 T helper cell	Adaptive
SLC35B3	Type 1 T helper cell	Adaptive
SIGLEC10	Type 1 T helper cell	Adaptive
SKAP1	Type 1 T helper cell	Adaptive
THUMPD2	Type 1 T helper cell	Adaptive
TIGIT	Type 1 T helper cell	Adaptive
ZEB2	Type 1 T helper cell	Adaptive
ENC1	Type 1 T helper cell	Adaptive
FAM134B	Type 1 T helper cell	Adaptive
FBXO30	Type 1 T helper cell	Adaptive
FCGR2C	Type 1 T helper cell	Adaptive
STAC	Type 1 T helper cell	Adaptive
LTC4S	Type 1 T helper cell	Adaptive
MAN1B1	Type 1 T helper cell	Adaptive
MDH1	Type 1 T helper cell	Adaptive
MMD	Type 1 T helper cell	Adaptive
RGS16	Type 1 T helper cell	Adaptive
IL12A	Type 1 T helper cell	Adaptive
P2RX5	Type 1 T helper cell	Adaptive
CD97	Type 1 T helper cell	Adaptive
ITGB4	Type 1 T helper cell	Adaptive
ICAM3	Type 1 T helper cell	Adaptive
METRNL	Type 1 T helper cell	Adaptive
TNFRSF1A	Type 1 T helper cell	Adaptive
IRF1	Type 1 T helper cell	Adaptive
HTR2B	Type 1 T helper cell	Adaptive
CALD1	Type 1 T helper cell	Adaptive
MOCOS	Type 1 T helper cell	Adaptive
TRAF3IP2	Type 1 T helper cell	Adaptive
TLR8	Type 1 T helper cell	Adaptive
TRAF1	Type 1 T helper cell	Adaptive
DUSP14	Type 1 T helper cell	Adaptive
IL17A	Type 17 T helper cell	Adaptive
IL17RA	Type 17 T helper cell	Adaptive
C2CD4A	Type 17 T helper cell	Adaptive
C2CD4B	Type 17 T helper cell	Adaptive
CA2	Type 17 T helper cell	Adaptive
CCDC65	Type 17 T helper cell	Adaptive
CEACAM3	Type 17 T helper cell	Adaptive
IL17C	Type 17 T helper cell	Adaptive
IL17F	Type 17 T helper cell	Adaptive
IL17RC	Type 17 T helper cell	Adaptive
IL17RE	Type 17 T helper cell	Adaptive
IL23A	Type 17 T helper cell	Adaptive
ILDR1	Type 17 T helper cell	Adaptive
LONRF3	Type 17 T helper cell	Adaptive
SH2D6	Type 17 T helper cell	Adaptive
TNIP2	Type 17 T helper cell	Adaptive
ABCA1	Type 17 T helper cell	Adaptive
ABCB1	Type 17 T helper cell	Adaptive
ADAMTS12	Type 17 T helper cell	Adaptive
ANK1	Type 17 T helper cell	Adaptive
ANKRD22	Type 17 T helper cell	Adaptive
B3GALT2	Type 17 T helper cell	Adaptive
CAMTA1	Type 17 T helper cell	Adaptive
CCR9	Type 17 T helper cell	Adaptive
CD40	Type 17 T helper cell	Adaptive
PTGDR2	Type 17 T helper cell	Adaptive
IFT80	Type 17 T helper cell	Adaptive
ASB2	Type 2 T helper cell	Adaptive
CSRP2	Type 2 T helper cell	Adaptive
DAPK1	Type 2 T helper cell	Adaptive
DLC1	Type 2 T helper cell	Adaptive
DNAJC12	Type 2 T helper cell	Adaptive
DUSP6	Type 2 T helper cell	Adaptive
GNAI1	Type 2 T helper cell	Adaptive
LAMP3	Type 2 T helper cell	Adaptive
NRP2	Type 2 T helper cell	Adaptive
OSBPL1A	Type 2 T helper cell	Adaptive
PDE4B	Type 2 T helper cell	Adaptive
PHLDA1	Type 2 T helper cell	Adaptive
PLA2G4A	Type 2 T helper cell	Adaptive
RAB27B	Type 2 T helper cell	Adaptive
RBMS3	Type 2 T helper cell	Adaptive
RNF125	Type 2 T helper cell	Adaptive
TMPRSS3	Type 2 T helper cell	Adaptive
GATA3	Type 2 T helper cell	Adaptive
BIRC5	Type 2 T helper cell	Adaptive
CDC25C	Type 2 T helper cell	Adaptive
CDC7	Type 2 T helper cell	Adaptive
CENPF	Type 2 T helper cell	Adaptive
CXCR6	Type 2 T helper cell	Adaptive
DHFR	Type 2 T helper cell	Adaptive
EVI5	Type 2 T helper cell	Adaptive
GSTA4	Type 2 T helper cell	Adaptive
HELLS	Type 2 T helper cell	Adaptive
IL26	Type 2 T helper cell	Adaptive
LAIR2	Type 2 T helper cell	Adaptive
ABCD1	Activated dendritic cell	Innate
C1QC	Activated dendritic cell	Innate
CAPG	Activated dendritic cell	Innate
CCL3L3	Activated dendritic cell	Innate
CD207	Activated dendritic cell	Innate
CD302	Activated dendritic cell	Innate
ATP5B	Activated dendritic cell	Innate
ATP5L	Activated dendritic cell	Innate
ATP6V1A	Activated dendritic cell	Innate
BCL2L1	Activated dendritic cell	Innate
C1QB	Activated dendritic cell	Innate
SNURF	Activated dendritic cell	Innate
SPCS3	Activated dendritic cell	Innate
CCNA1	Activated dendritic cell	Innate
CEACAM8	Activated dendritic cell	Innate
NOS2	Activated dendritic cell	Innate
SRA1	Activated dendritic cell	Innate
TNFRSF6B	Activated dendritic cell	Innate
TREM1	Activated dendritic cell	Innate
TREML1	Activated dendritic cell	Innate
RHOA	Activated dendritic cell	Innate
SLC25A37	Activated dendritic cell	Innate
TNFSF14	Activated dendritic cell	Innate
TREML4	Activated dendritic cell	Innate
VNN2	Activated dendritic cell	Innate
XPO6	Activated dendritic cell	Innate
CLEC4C	Activated dendritic cell	Innate
TNFAIP2	Activated dendritic cell	Innate
UBD	Activated dendritic cell	Innate
ACTR3	Activated dendritic cell	Innate
RAB1A	Activated dendritic cell	Innate
SLA	Activated dendritic cell	Innate
HLA-DQA2	Activated dendritic cell	Innate
SIGLEC5	Activated dendritic cell	Innate
SLAMF9	Activated dendritic cell	Innate
ABAT	CD56bright natural killer cell	Innate
SMCO4	CD56bright natural killer cell	Innate
C5orf15	CD56bright natural killer cell	Innate
CDHR1	CD56bright natural killer cell	Innate
DCAF12	CD56bright natural killer cell	Innate
DYNLL1	CD56bright natural killer cell	Innate
GPR137B	CD56bright natural killer cell	Innate
HCP5	CD56bright natural killer cell	Innate
HDGFRP2	CD56bright natural killer cell	Innate
KRT86	CD56bright natural killer cell	Innate
MLST8	CD56bright natural killer cell	Innate
ELMOD3	CD56bright natural killer cell	Innate
ENTPD5	CD56bright natural killer cell	Innate
METTL21A	CD56bright natural killer cell	Innate
FAM179A	CD56bright natural killer cell	Innate
CLIC2	CD56bright natural killer cell	Innate
COX7A2L	CD56bright natural killer cell	Innate
CREB3L4	CD56bright natural killer cell	Innate
CSF1	CD56bright natural killer cell	Innate
CSNK2A2	CD56bright natural killer cell	Innate
CSTA	CD56bright natural killer cell	Innate
CSTB	CD56bright natural killer cell	Innate
CTPS1	CD56bright natural killer cell	Innate
CTSD	CD56bright natural killer cell	Innate
FST	CD56bright natural killer cell	Innate
GATA2	CD56bright natural killer cell	Innate
GMPR	CD56bright natural killer cell	Innate
HDC	CD56bright natural killer cell	Innate
HEY1	CD56bright natural killer cell	Innate
HOXA1	CD56bright natural killer cell	Innate
HS2ST1	CD56bright natural killer cell	Innate
HS3ST1	CD56bright natural killer cell	Innate
BCL11B	CD56bright natural killer cell	Innate
CDH3	CD56bright natural killer cell	Innate
MYL6B	CD56bright natural killer cell	Innate
NAA16	CD56bright natural killer cell	Innate
ClQA	CD56bright natural killer cell	Innate
ClQB	CD56bright natural killer cell	Innate
CYP27B1	CD56bright natural killer cell	Innate
EIF3M	CD56bright natural killer cell	Innate
CYP27A1	CD56dim natural killer cell	Innate
DDX55	CD56dim natural killer cell	Innate
DYRK2	CD56dim natural killer cell	Innate
RPL37A	CD56dim natural killer cell	Innate
NOTCH3	CD56dim natural killer cell	Innate
AKR7A3	CD56dim natural killer cell	Innate
GPRC5C	CD56dim natural killer cell	Innate
GRIN1	CD56dim natural killer cell	Innate
HLA-E	CD56dim natural killer cell	Innate
PORCN	CD56dim natural killer cell	Innate
PSMC4	CD56dim natural killer cell	Innate
UPP1	CD56dim natural killer cell	Innate
IL21R	CD56dim natural killer cell	Innate
KIR2DS1	CD56dim natural killer cell	Innate
KIR2DS2	CD56dim natural killer cell	Innate
KIR2DS5	CD56dim natural killer cell	Innate
GIPR	Eosinophil	Innate
KRT18P50	Eosinophil	Innate
LRMP	Eosinophil	Innate
FOSB	Eosinophil	Innate
RRP12	Eosinophil	Innate
GPR183	Eosinophil	Innate
NR4A3	Eosinophil	Innate
ST3GAL6	Eosinophil	Innate
DEPDC5	Eosinophil	Innate
PDE6C	Eosinophil	Innate
PKD2L2	Eosinophil	Innate
GPR65	Eosinophil	Innate
IL5RA	Eosinophil	Innate
P2RY14	Eosinophil	Innate
DACH1	Eosinophil	Innate
DAPK2	Eosinophil	Innate
EMR3	Eosinophil	Innate
ACADM	Immature dendritic cell	Innate
AHCYL1	Immature dendritic cell	Innate
ALDH1A2	Immature dendritic cell	Innate
ALDH3A2	Immature dendritic cell	Innate
ALDH9A1	Immature dendritic cell	Innate
ALOX15	Immature dendritic cell	Innate
AMT	Immature dendritic cell	Innate
ARL1	Immature dendritic cell	Innate
ATIC	Immature dendritic cell	Innate
ATP5A1	Immature dendritic cell	Innate
CAPZA1	Immature dendritic cell	Innate
LILRA5	Immature dendritic cell	Innate
RDX	Immature dendritic cell	Innate
RRAGD	Immature dendritic cell	Innate
TACSTD2	Immature dendritic cell	Innate
INPP5F	Immature dendritic cell	Innate
RAB38	Immature dendritic cell	Innate
PLAU	Immature dendritic cell	Innate
CSF3R	Immature dendritic cell	Innate
SLC18A2	Immature dendritic cell	Innate
AMPD2	Immature dendritic cell	Innate
CLTB	Immature dendritic cell	Innate
C1orf162	Immature dendritic cell	Innate
AIF1	Macrophage	Innate
CCL1	Macrophage	Innate
CCL14	Macrophage	Innate
CCL23	Macrophage	Innate
CCL26	Macrophage	Innate
CD300LB	Macrophage	Innate
CNR1	Macrophage	Innate
CNR2	Macrophage	Innate
EIF1	Macrophage	Innate
EIF4A1	Macrophage	Innate
FPR1	Macrophage	Innate
FPR2	Macrophage	Innate
FRAT2	Macrophage	Innate
GPR27	Macrophage	Innate
C5AR2	Macrophage	Innate
RNASE2	Macrophage	Innate
MS4A2	Macrophage	Innate
BASP1	Macrophage	Innate
IGSF6	Macrophage	Innate
HK3	Macrophage	Innate
VNN1	Macrophage	Innate
FES	Macrophage	Innate
NPL	Macrophage	Innate
FZD2	Macrophage	Innate
FAM198B	Macrophage	Innate
HNMT	Macrophage	Innate
SLC15A3	Macrophage	Innate
CD4	Macrophage	Innate
NME8	Macrophage	Innate
FRMD4A	Macrophage	Innate
CRYBB1	Macrophage	Innate
HRH1	Macrophage	Innate
WNT5B	Macrophage	Innate
ADAMTS3	Mast cell	Innate
CPA3	Mast cell	Innate
CMA1	Mast cell	Innate
CTSG	Mast cell	Innate
ARHGAP15	Mast cell	Innate
CPM	Mast cell	Innate
FCN1	Mast cell	Innate
FTL	Mast cell	Innate
HSPA6	Mast cell	Innate
ITGA9	Mast cell	Innate
RNASE3	Mast cell	Innate
S100A4	Mast cell	Innate
SIGLEC8	Mast cell	Innate
SLC6A4	Mast cell	Innate
PTGS2	Mast cell	Innate
EGR3	Mast cell	Innate
PILRA	Mast cell	Innate
CCR2	MDSC	Innate
CD14	MDSC	Innate
CD2	MDSC	Innate
CD86	MDSC	Innate
CXCR4	MDSC	Innate
FCGR2A	MDSC	Innate
FCGR2B	MDSC	Innate
FCGR3A	MDSC	Innate
FERMT3	MDSC	Innate
GPSM3	MDSC	Innate
IL18BP	MDSC	Innate
IL4R	MDSC	Innate
ITGAL	MDSC	Innate
ITGAM	MDSC	Innate
PARVG	MDSC	Innate
PSAP	MDSC	Innate
PTGER2	MDSC	Innate
PTGES2	MDSC	Innate
S100A8	MDSC	Innate
S100A9	MDSC	Innate
ASGR2	Monocyte	Innate
CFP	Monocyte	Innate
ASGR1	Monocyte	Innate
CD1D	Monocyte	Innate
UPK3A	Monocyte	Innate
ACTG1	Monocyte	Innate
ANXA5	Monocyte	Innate
ATP6V1B2	Monocyte	Innate
CFL1	Monocyte	Innate
DAZAP2	Monocyte	Innate
CTBS	Monocyte	Innate
EMR4P	Monocyte	Innate
HIVEP2	Monocyte	Innate
MARCKSL1	Monocyte	Innate
MBP	Monocyte	Innate
MMP15	Monocyte	Innate
PNPLA6	Monocyte	Innate
TMBIM6	Monocyte	Innate
PQBP1	Monocyte	Innate
TEX264	Monocyte	Innate
IKZF1	Monocyte	Innate
AKT3	Natural killer cell	Innate
AXL	Natural killer cell	Innate
BST2	Natural killer cell	Innate
CDH2	Natural killer cell	Innate
CRTAM	Natural killer cell	Innate
CSF2RA	Natural killer cell	Innate
CTSZ	Natural killer cell	Innate
CXCL1	Natural killer cell	Innate
CYTH1	Natural killer cell	Innate
DAXX	Natural killer cell	Innate
DGKH	Natural killer cell	Innate
DLL4	Natural killer cell	Innate
DPYD	Natural killer cell	Innate
ERBB3	Natural killer cell	Innate
F11R	Natural killer cell	Innate
FAM27A	Natural killer cell	Innate
FAM49A	Natural killer cell	Innate
FASLG	Natural killer cell	Innate
FCGR1A	Natural killer cell	Innate
FN1	Natural killer cell	Innate
FSTL1	Natural killer cell	Innate
FUCA1	Natural killer cell	Innate
GBP3	Natural killer cell	Innate
GLS2	Natural killer cell	Innate
GRB2	Natural killer cell	Innate
LST1	Natural killer cell	Innate
BCL2	Natural killer cell	Innate
CDC5L	Natural killer cell	Innate
FGF18	Natural killer cell	Innate
FUT5	Natural killer cell	Innate
FZR1	Natural killer cell	Innate
GAGE2A	Natural killer cell	Innate
IGFBP5	Natural killer cell	Innate
KANK2	Natural killer cell	Innate
LDB3	Natural killer cell	Innate
BTN2A2	Natural killer T cell	Innate
CD101	Natural killer T cell	Innate
CD109	Natural killer T cell	Innate
CNPY3	Natural killer T cell	Innate
CNPY4	Natural killer T cell	Innate
CREB1	Natural killer T cell	Innate
CRTC2	Natural killer T cell	Innate
CRTC3	Natural killer T cell	Innate
CSF2	Natural killer T cell	Innate
KLRC1	Natural killer T cell	Innate
FUT4	Natural killer T cell	Innate
ICAM2	Natural killer T cell	Innate
IL32	Natural killer T cell	Innate
LAMP2	Natural killer T cell	Innate
LILRB5	Natural killer T cell	Innate
KLRG1	Natural killer T cell	Innate
HSPA4	Natural killer T cell	Innate
HSPB6	Natural killer T cell	Innate
ISM2	Natural killer T cell	Innate
ITIH2	Natural killer T cell	Innate
KDM4C	Natural killer T cell	Innate
KIR2DS4	Natural killer T cell	Innate
KIRREL3	Natural killer T cell	Innate
SDCBP	Natural killer T cell	Innate
NFATC2IP	Natural killer T cell	Innate
MICB	Natural killer T cell	Innate
KIR2DL1	Natural killer T cell	Innate
KIR2DL3	Natural killer T cell	Innate
KIR3DL1	Natural killer T cell	Innate
KIR3DL2	Natural killer T cell	Innate
NCR1	Natural killer T cell	Innate
FOSL1	Natural killer T cell	Innate
TSLP	Natural killer T cell	Innate
SLC7A7	Natural killer T cell	Innate
SPP1	Natural killer T cell	Innate
TREM2	Natural killer T cell	Innate
UBASH3A	Natural killer T cell	Innate
YBX2	Natural killer T cell	Innate
CCDC88A	Natural killer T cell	Innate
CLEC1A	Natural killer T cell	Innate
THBD	Natural killer T cell	Innate
PDPN	Natural killer T cell	Innate
VCAM1	Natural killer T cell	Innate
EMR1	Natural killer T cell	Innate
CREB5	Neutrophil	Innate
CDA	Neutrophil	Innate
CHST15	Neutrophil	Innate
S100A12	Neutrophil	Innate
APOBEC3A	Neutrophil	Innate
CASP5	Neutrophil	Innate
MMP25	Neutrophil	Innate
HAL	Neutrophil	Innate
FAM212B	Neutrophil	Innate
FFAR2	Neutrophil	Innate
MAK	Neutrophil	Innate
CXCR1	Neutrophil	Innate
STEAP4	Neutrophil	Innate
MGAM	Neutrophil	Innate
BTNL8	Neutrophil	Innate
CXCR2	Neutrophil	Innate
TNFRSF10C	Neutrophil	Innate
VNN3	Neutrophil	Innate
CBX6	Plasmacytoid dendritic cell	Innate
DAB2	Plasmacytoid dendritic cell	Innate
DDX17	Plasmacytoid dendritic cell	Innate
HIGD1A	Plasmacytoid dendritic cell	Innate
IDH3A	Plasmacytoid dendritic cell	Innate
IL3RA	Plasmacytoid dendritic cell	Innate
MAGED1	Plasmacytoid dendritic cell	Innate
NUCB2	Plasmacytoid dendritic cell	Innate
OFD1	Plasmacytoid dendritic cell	Innate
OGT	Plasmacytoid dendritic cell	Innate
PDIA4	Plasmacytoid dendritic cell	Innate
SERTAD2	Plasmacytoid dendritic cell	Innate
SIRPA	Plasmacytoid dendritic cell	Innate
TMED2	Plasmacytoid dendritic cell	Innate
ENG	Plasmacytoid dendritic cell	Innate
FCAR	Plasmacytoid dendritic cell	Innate
IGF1	Plasmacytoid dendritic cell	Innate
ITGA2B	Plasmacytoid dendritic cell	Innate
GABARAP	Plasmacytoid dendritic cell	Innate
GPX1	Plasmacytoid dendritic cell	Innate
KRT23	Plasmacytoid dendritic cell	Innate
PROK2	Plasmacytoid dendritic cell	Innate
RALB	Plasmacytoid dendritic cell	Innate
RETNLB	Plasmacytoid dendritic cell	Innate
RNF141	Plasmacytoid dendritic cell	Innate
SEC14L1	Plasmacytoid dendritic cell	Innate
MSRB1	Plasmacytoid dendritic cell	Innate
EMP3	Plasmacytoid dendritic cell	Innate
CD300LF	Plasmacytoid dendritic cell	Innate
ABTB1	Plasmacytoid dendritic cell	Innate
KLHL21	Plasmacytoid dendritic cell	Innate
PHRF1	Plasmacytoid dendritic cell	Innate

## Sheet: S2
Table S2 GSEA enrichment analysis in TCGA set
GSEA enrichment analysis of ICIcluster 1 and ICIcluster 2
ID	Description	setSize	enrichmentScore	NES	pvalue	p.adjust	qvalues	rank	leading_edge	core_enrichment
hsa05330	Allograft rejection	35	0.838773	2.27785	0.00223214	0.0218294	0.0175509	2149	tags=83%, list=12%, signal=73%	3118/3111/3135/3458/3117/3127/3119/3113/3123/3112/3122/3115/3593/959/940/3106/3108/7124/356/942/3134/3558/3586/3105/3107/941/3002/355/958
hsa05310	Asthma	28	0.836895	2.18882	0.00209644	0.0218294	0.0175509	1468	tags=71%, list=8%, signal=66%	3118/3111/6356/2205/3117/3127/3119/3113/3123/3112/3122/3115/3562/959/3108/7124/2206/3586/2207/6037
hsa05332	Graft-versus-host disease	38	0.818019	2.25009	0.00222222	0.0218294	0.0175509	2838	tags=84%, list=15%, signal=71%	3118/3111/3135/3458/3117/3127/3119/3113/3123/3112/3122/3115/940/3106/3108/7124/356/942/3134/3558/3821/3105/3107/941/3002/3553/355/5551/3552/3804/3812/3133
hsa04940	Type I diabetes mellitus	41	0.808263	2.25486	0.00217865	0.0218294	0.0175509	2062	tags=73%, list=11%, signal=65%	4049/3118/3630/3111/5798/3135/3458/3117/3127/3119/3113/3123/3112/3122/3115/3593/940/3106/3108/7124/356/942/3134/3558/3105/3107/941/3002/3553/355
hsa04672	Intestinal immune network for IgA production	45	0.778538	2.21381	0.00220751	0.0218294	0.0175509	1505	tags=56%, list=8%, signal=51%	3118/3111/10803/3117/3127/23495/29851/3119/3113/3123/3112/3122/608/3115/959/940/3108/942/57379/3558/10673/3695/3586/5284/941
hsa05322	Systemic lupus erythematosus	51	0.769831	2.24038	0.00226244	0.0218294	0.0175509	2323	tags=71%, list=13%, signal=62%	3118/3111/3458/3117/1991/3127/3119/3113/3123/3112/3122/3115/717/718/959/940/3108/7124/942/713/712/715/2209/3586/2212/1511/714/716/730/941/2214/720/721/729/958/87
hsa05321	Inflammatory bowel disease	63	0.739442	2.25289	0.00225225	0.0218294	0.0175509	3621	tags=71%, list=20%, signal=58%	3118/3111/59067/3458/3117/3127/3605/3561/3119/3113/3123/3112/3122/50943/64127/3115/3593/3108/7124/6775/3558/3606/3594/6772/3586/149233/51561/50615/50616/8807/3553/30009/3566/7043/3552/2625/7042/7100/7097/3569/8809/3459/3565/3596/6778
hsa04061	Viral protein interaction with cytokine and cytokine receptor	98	0.737629	2.39279	0.00238663	0.0218294	0.0175509	2306	tags=58%, list=12%, signal=51%	27178/6346/6354/6361/6374/6364/6367/6357/4049/10563/5473/6356/10803/2919/6362/4283/3561/6369/6368/6373/6363/3627/8740/3576/2829/9547/729230/3559/1234/6375/2920/7124/6846/2921/643/3558/1237/1233/3606/6372/3560/6352/1235/1236/3586/1230/1435/6351/11009/1436/6347/8807/7133/6348/2833/8797/3587
hsa05323	Rheumatoid arthritis	89	0.734544	2.3478	0.002331	0.0218294	0.0175509	2113	tags=52%, list=11%, signal=46%	5741/6374/6364/4050/1437/1493/3118/3111/2919/3458/3117/3127/3605/3119/3113/3123/3112/3122/3115/3689/54/940/3576/8600/3383/1513/2920/3108/7124/4314/2921/942/3606/50617/10673/6372/6352/1435/941/3683/51561/245972/6347/6348/3553/10312
hsa05416	Viral myocarditis	57	0.67712	2.01956	0.00226757	0.0218294	0.0175509	1535	tags=46%, list=8%, signal=42%	3118/3111/3135/3117/3127/3119/3113/3123/3112/3122/3115/5880/3689/959/940/3383/3106/3108/1604/942/3134/3105/3107/637/941/3683
hsa05140	Leishmaniasis	73	0.676443	2.10462	0.00225734	0.0218294	0.0175509	2895	tags=49%, list=16%, signal=42%	3118/3111/3458/3117/3127/3119/3113/3123/3112/3122/3115/3593/4688/3689/718/3684/653361/4689/1378/3108/7124/1536/6772/2209/3586/2212/5743/2214/3553/3676/1379/7043/3552/5603/4615/7042
hsa04612	Antigen processing and presentation	68	0.670167	2.07551	0.00224719	0.0218294	0.0175509	2838	tags=51%, list=15%, signal=44%	3118/3111/3135/3458/3117/3127/3119/3113/3123/3112/3122/3115/972/3310/4261/3106/3108/7124/3134/3821/6890/3822/567/3105/3107/1520/3823/8302/6891/920/3304/3804/10437/3812/3133
hsa04659	Th17 cell differentiation	105	0.653421	2.14485	0.002457	0.0218294	0.0175509	3485	tags=50%, list=19%, signal=41%	3118/3111/59067/3458/3117/3127/3605/3561/3119/3113/3123/915/3112/3122/50943/3115/916/3559/3718/917/3108/861/7535/3558/3594/6772/919/3560/149233/7046/3932/3556/51561/50615/50616/4794/196/6258/3553/30009/3566/920/2625/5603/6776/3570/3554/9466/3091/3569/27040/3459/3565
hsa04640	Hematopoietic cell lineage	95	0.641781	2.08901	0.00231481	0.0218294	0.0175509	2436	tags=53%, list=13%, signal=46%	910/909/913/911/1437/3118/3111/3117/3127/3119/3113/3123/915/3112/3122/930/290/914/3115/3562/921/916/3559/3684/924/3575/917/1378/3108/7124/1604/2208/951/2322/7850/2209/3673/945/3675/1435/931/1436/3574/1380/3553/3566/3676/4311/1379/920
hsa04658	Th1 and Th2 cell differentiation	90	0.630305	2.01916	0.00232019	0.0218294	0.0175509	1424	tags=31%, list=8%, signal=29%	3118/3111/3458/3117/3127/3561/3119/3113/3123/915/3112/3122/3115/3593/916/3559/3718/917/3108/7535/6775/3558/3594/6772/919/3560/3932/864
hsa04064	NF-kappa B signaling pathway	102	0.609478	1.99753	0.00236967	0.0218294	0.0175509	3406	tags=46%, list=18%, signal=38%	6357/3929/4050/4049/2919/330/597/6363/84433/8740/959/3576/8600/5328/3383/2920/7124/2921/7535/23643/10673/695/3932/5743/6351/4067/7188/3553/5971/7412/958/598/115650/388372/4791/8792/4615/929/7132/3554/29760/23586/7128/27040/7185/9020/148022
hsa04657	IL-17 signaling pathway	94	0.607419	1.97409	0.00229358	0.0218294	0.0175509	1204	tags=26%, list=7%, signal=24%	4322/6354/6361/6374/6364/3934/1437/6356/2919/3458/3605/6280/3627/6278/4318/1673/3576/2920/6279/7124/4314/2921/27189/6372
hsa05340	Primary immunodeficiency	36	0.606224	1.64272	0.00907029	0.0672026	0.0540312	2436	tags=61%, list=13%, signal=53%	973/23495/29851/3561/915/930/959/916/3718/4261/3575/7535/57379/5788/695/3543/6890/3932/958/115650/6891/920
hsa05320	Autoimmune thyroid disease	50	0.597872	1.72659	0.00228311	0.0218294	0.0175509	2149	tags=64%, list=12%, signal=57%	1493/3118/3111/3135/3117/3127/3119/3113/3123/3112/3122/1081/3115/959/940/3444/3106/3108/356/942/3134/3558/3442/3586/3105/3107/941/3445/3002/355/3439/958
hsa05150	Staphylococcus aureus infection	91	0.591926	1.90447	0.00229358	0.0218294	0.0175509	1747	tags=55%, list=9%, signal=50%	3868/629/3118/3882/3111/3860/3117/3127/3119/3113/3123/3880/3112/3122/3115/717/3689/718/1673/3872/3684/3383/2213/25984/3108/3866/2359/3075/2358/713/3857/6404/712/715/2209/3884/3586/3885/2212/3426/714/716/3881/5724/3683/2214/720/2357/719/721
hsa04062	Chemokine signaling pathway	188	0.586894	2.07842	0.00250627	0.0218294	0.0175509	1816	tags=30%, list=10%, signal=28%	6346/6354/6361/6374/6364/6367/6357/10563/5473/6356/10803/2919/6362/4283/6369/6368/6373/6363/3627/5880/94235/3576/2829/9547/729230/3055/1234/653361/3718/6375/2920/114/10663/6846/2921/3702/643/1237/1233/113/6772/6372/7409/7454/6352/1235/1236/1230/5330/1794/2268/23533/6351/58191/146850/4067/6347
hsa05134	Legionellosis	57	0.585073	1.74502	0.00226757	0.0218294	0.0175509	3288	tags=42%, list=18%, signal=35%	2919/3593/3689/718/3310/3576/3684/2920/1378/7124/2921/3606/3553/834/29108/1379/58484/3304/4791/4615/929/7100/7097/3569
hsa04145	Phagosome	148	0.582848	2.00713	0.00246305	0.0218294	0.0175509	2550	tags=39%, list=14%, signal=34%	8685/729238/3118/3111/3135/3117/3127/3119/3113/3123/10381/3112/3122/3115/81035/4688/3689/718/4973/4360/3684/653361/2213/4689/3106/7058/3108/1536/11151/3134/4481/50617/715/2209/3673/2212/6890/3105/3107/64581/2214/1520/338382/245972/9902/10333/1311/10312/79861/4153/7277/84617/10382/7057/6891/30835/7846/2204
hsa05133	Pertussis	76	0.578973	1.81376	0.0022779	0.0218294	0.0175509	2214	tags=38%, list=12%, signal=34%	6374/810/729238/717/3593/3689/718/3576/3684/7124/23643/713/712/715/6372/3586/10392/714/716/3394/51561/720/721/3659/710/3553/834/29108/114548
hsa03030	DNA replication	36	0.5675	1.53779	0.0249433	0.149267	0.120012	5609	tags=69%, list=30%, signal=48%	4173/4175/4174/5424/4171/29935/5111/5427/10535/5984/4176/5558/5557/84153/57804/5983/4172/5982/2237/3978/23649/6118/6119/5426/54107
hsa05144	Malaria	50	0.564389	1.6299	0.00456621	0.0372146	0.0299207	3288	tags=60%, list=18%, signal=49%	3458/3689/959/3576/3383/7058/1378/7124/4233/3820/3606/3586/3683/2532/22914/6347/3553/1311/100528032/7412/958/1379/7057/7043/6403/4615/7042/4035/7097/3569
hsa05145	Toxoplasmosis	110	0.564277	1.86595	0.002457	0.0218294	0.0175509	2965	tags=36%, list=16%, signal=31%	240/79444/3118/3111/3458/3117/3127/3119/3113/330/3123/3112/3122/3115/3593/959/3310/1234/4261/3914/3108/7124/3949/23643/6772/3586/23533/146850/3909/3918/958/598/3587/7043/3304/5603/4615/284217/7042/7132
hsa04060	Cytokine-cytokine receptor interaction	293	0.562144	2.05977	0.0025	0.0218294	0.0175509	3193	tags=54%, list=17%, signal=45%	27178/6346/6354/6361/6374/6364/6367/27179/284340/6357/56300/4050/1437/4049/133396/10563/5473/8784/8995/6356/10803/2919/27177/26525/59067/6362/4283/3458/23495/55801/10148/3605/3561/6369/6368/6373/6363/970/3627/608/3557/3604/84639/3562/3593/8740/959/3444/282618/3576/2829/9547/729230/8600/3559/1234/6375/2920/3575/10663/7124/8744/356/6846/5008/2921/27189/643/3558/9518/7850/1237/1233/3606/7292/3594/10…
hsa04668	TNF signaling pathway	111	0.560325	1.8602	0.00245098	0.0218294	0.0175509	3517	tags=40%, list=19%, signal=32%	6374/6364/1437/4049/2919/330/3627/64127/4318/3383/2920/7124/4314/2921/9586/6372/6352/1435/5743/6347/3659/7188/7133/3553/355/602/5293/7412/4217/4323/5603/3456/7132/3976/84699/6376/3569/8809/7128/7185/9020/10000/8772/3600
hsa04380	Osteoclast differentiation	124	0.555387	1.86993	0.00253807	0.0218294	0.0175509	3489	tags=45%, list=19%, signal=37%	3458/55423/126014/4688/54/11006/8600/54209/653361/1513/2213/6688/4689/79168/7124/7305/10326/6772/2209/695/2212/7046/3932/1435/23547/11025/2214/11027/10288/1436/10859/140885/3937/3553/799/5971/5293/3455/2534/3552/4791/353514/5603/8792/10379/3456/7042/7132/3554/29760/814/10990/2355/9020/3459/10000
hsa04514	Cell adhesion molecules	140	0.55469	1.89925	0.00251889	0.0218294	0.0175509	2675	tags=50%, list=14%, signal=43%	79679/1493/3118/9071/3111/3135/3117/3127/201633/29851/3119/3113/3123/3112/3122/914/9075/3115/3689/959/1462/940/6693/3684/3383/3106/3108/3385/942/80380/3134/5788/10686/6404/3695/6385/6402/3696/3105/9378/3107/1272/9076/941/5010/1013/3897/3683/923/1001/23562/29126/965/5792/1002/6614/57863/4685/7412/958/5133/1364/3676/9672/80381/920/4897/1366/6403/57555
hsa04650	Natural killer cell mediated cytotoxicity	123	0.541268	1.82571	0.0025	0.0218294	0.0175509	2881	tags=45%, list=16%, signal=38%	5582/1437/3135/3458/5880/3689/4068/3444/3383/3106/259197/10870/7124/7305/356/154064/7535/962/135250/3821/7409/919/3442/3822/3105/9437/3107/3932/2207/637/3683/2214/22914/3445/3823/4277/3002/353091/51744/3937/355/3439/100528032/5293/6452/8797/2185/3455/80328/5551/2534/3804/3812/3133/3456
hsa05146	Amoebiasis	100	0.528866	1.72368	0.0023753	0.0218294	0.0175509	2940	tags=39%, list=16%, signal=33%	910/5582/909/913/911/2335/1437/1277/2919/3458/5273/6317/3593/3689/2769/3576/3684/2920/1281/3914/7124/2921/7850/3586/5330/1511/1278/338382/3909/3553/3918/5293/87/5275/7043/284217/7042/929/5272
hsa05152	Tuberculosis	176	0.520185	1.82829	0.00246305	0.0218294	0.0175509	2965	tags=39%, list=16%, signal=33%	3929/810/3118/3111/3458/3117/3127/3119/3113/3123/3112/3122/64127/3115/3593/3689/718/972/4046/4360/3444/3684/3687/4261/2213/1378/3108/7124/11151/3606/6772/50617/2209/64170/3442/3586/2212/64581/2207/637/2214/51561/1520/3445/8877/245972/9902/10333/3553/10312/3439/3587/815/1379/1509/30835/8767/3656/7043/3552/1263/5603/7096/4615/3456/7042/929/7132
hsa03010	Ribosome	134	0.50831	1.73071	0.00253165	0.0218294	0.0175509	5739	tags=66%, list=31%, signal=46%	140032/100529239/6192/64928/25873/6191/6187/6203/9045/6136/6176/6202/140801/6206/6232/6173/6130/6158/6235/6181/6168/200916/6188/6193/4736/6161/6204/6234/6210/6132/6224/6144/65005/6154/6175/6137/11224/6223/6133/6218/6170/6160/23521/6165/6122/6147/6152/6169/7311/6222/6134/6205/6230/6208/6189/6229/6156/6209/6157/6141/9349/6194/3921/6164/63875/6135/6228/6155/6201/6129/6227/2197/51065/6207/6217/64968/…
hsa04660	T cell receptor signaling pathway	100	0.508154	1.65618	0.0023753	0.0218294	0.0175509	2191	tags=25%, list=12%, signal=22%	1437/1493/3458/29851/915/84433/959/940/916/917/7124/3702/7535/3558/5788/7409/919/3586/3932/9402/4794/10125/3937/5293/5133
hsa04662	B cell receptor signaling pathway	79	0.498527	1.56869	0.0114155	0.0826991	0.0664904	2732	tags=29%, list=15%, signal=25%	973/27071/84433/930/5880/11006/2213/79168/7409/695/23547/11025/11027/10288/4067/4794/1380/10859/8519/5293/3635/974/353514
hsa05166	Human T-cell leukemia virus 1 infection	217	0.494442	1.77606	0.00251889	0.0218294	0.0175509	3645	tags=33%, list=20%, signal=27%	4316/1437/4049/3118/3111/3135/3117/3127/3561/3119/3113/3123/915/3112/3122/3115/3689/1029/916/3559/8900/3383/3718/6688/3106/917/114/3108/7124/3134/3558/7850/113/9586/3560/567/3105/7046/3107/3932/3683/5971/1030/5293/958/598/115650/920/11200/7043/3601/4791/3133/4214/7042/6776/7132/84699/706/3554/3569/9020/4609/1869/6513/10000/3600/1870/8379/581/4776
hsa05164	Influenza A	168	0.49008	1.70824	0.00249377	0.0218294	0.0175509	2313	tags=30%, list=13%, signal=26%	56649/3118/3111/3458/3117/3127/23430/3119/3113/3123/3112/3627/3122/3115/5644/3593/3444/3576/7177/3383/4261/3108/64499/7124/356/3606/6772/6352/3442/91543/637/3445/4938/402569/6347/5646/3553/355/51284/3439/834/5293/29108/7113/114548/4600/8797/4940/4599/3455
hsa05169	Epstein-Barr virus infection	198	0.482477	1.71355	0.00251889	0.0218294	0.0175509	3921	tags=41%, list=21%, signal=33%	3118/3111/3135/3117/3127/3119/3113/3123/915/3112/3627/3122/930/3115/3444/916/8900/3383/3718/3106/917/3108/7124/2208/3134/6772/695/919/3442/6890/567/3105/3107/864/9636/637/3683/3445/4938/4067/7188/4794/1380/377841/965/355/3439/5971/5293/958/4940/3455/6891/1643/4791/5603/4615/10379/3133/3456/3441/29760/7097/23586/3569/7128/9020/4609/1869/10000/8772/1870/581/1647/4939/3661/6773/6892/3665/896/890/3109
hsa04972	Pancreatic secretion	100	0.479304	1.56215	0.00712589	0.0553105	0.0444698	1979	tags=26%, list=11%, signal=23%	5406/10136/23436/1357/1360/5582/30814/5874/26279/63036/9635/279/5644/886/114/1080/1359/113/5330/8399/277/440387/391013/5646/64600/5319
hsa00592	alpha-Linolenic acid metabolism	24	0.473277	1.19918	0.216102	0.541917	0.435703	2492	tags=33%, list=13%, signal=29%	30814/26279/8399/391013/64600/5319/84647/5321
hsa04625	C-type lectin receptor signaling pathway	104	0.471455	1.54444	0.00735294	0.0557455	0.0448196	2875	tags=31%, list=16%, signal=26%	6361/6367/810/3593/4046/7124/93978/51266/3558/6772/64170/3586/64581/2207/5743/51561/338339/3659/3553/834/602/5971/5293/29108/114548/6237/30835/4791/1263/5603/10379/3710
hsa04610	Complement and coagulation cascades	85	0.454467	1.43851	0.0280374	0.153774	0.123635	2380	tags=44%, list=13%, signal=38%	629/5265/5055/5329/717/3689/718/5627/2158/5328/3684/3687/1378/1604/3075/713/712/715/11326/3426/714/716/1191/730/10878/2151/720/719/721/5624/710/1380/729/728/4153/5345/1379
hsa04664	Fc epsilon RI signaling pathway	67	0.453982	1.39743	0.0497738	0.21073	0.169428	2752	tags=27%, list=15%, signal=23%	240/1437/2205/241/3562/5880/7124/2206/7409/695/2207/4067/3937/5293/5321/3635/2534/5603
hsa04215	Apoptosis - multiple species	30	0.447195	1.18183	0.232258	0.56178	0.451673	4180	tags=40%, list=23%, signal=31%	79444/330/5366/4804/637/598/27113/7132/8772/581/841/840
hsa04974	Protein digestion and absorption	102	0.438186	1.43613	0.0331754	0.168987	0.135866	2952	tags=36%, list=16%, signal=31%	256076/10136/23436/1301/1357/1360/1300/3783/1277/63036/5644/1296/1281/1294/4224/1359/6510/1803/1278/1289/1293/1295/440387/7512/5646/1303/4311/169044/1290/483/1307/285641/1292/9056/1504/136227/255631
hsa05143	African trypanosomiasis	36	0.437629	1.18587	0.219955	0.54515	0.438303	2148	tags=36%, list=12%, signal=32%	5582/3458/3593/3383/7124/356/3606/3586/5330/8542/3553/355/7412
hsa04670	Leukocyte transendothelial migration	112	0.433741	1.43741	0.0176768	0.115253	0.0926635	2767	tags=31%, list=15%, signal=27%	5582/9071/9075/5880/4688/3689/4318/3684/3383/653361/4689/399/1536/3702/10686/7409/93408/9076/5010/3683/29895/23562/5293/7412/83593/1364/3676/4313/2185/87/4478/6494/1366/5603/1365
hsa04142	Lysosome	128	0.423984	1.43996	0.0148883	0.099053	0.079639	3505	tags=26%, list=19%, signal=21%	1075/968/1510/9476/54/1513/1512/7805/50617/1511/1520/245972/10577/4864/1521/6556/768239/58511/10312/1509/3988/26503/5476/5538/4125/3074/2760/5660/2517/8722/1211/3482/967
hsa04620	Toll-like receptor signaling pathway	102	0.423252	1.38719	0.0450237	0.198076	0.159254	3495	tags=40%, list=19%, signal=33%	3929/4283/6373/3627/3593/3444/3576/1513/7124/942/51311/23643/6772/6352/3442/3663/941/3445/6351/6696/10333/6348/3553/51284/3439/5293/958/3455/388372/5603/7096/4615/3456/929/3441/7100/7097/3569/148022/10000/8772
hsa05235	PD-L1 expression and PD-1 checkpoint pathway in cancer	89	0.42313	1.35244	0.0582751	0.234539	0.18857	3489	tags=29%, list=19%, signal=24%	3458/10538/915/940/916/917/55509/7535/6772/919/3932/4794/29126/10125/5293/116071/5133/920/5603/4615/7097/3091/27040/148022/3459/10000
hsa05171	Coronavirus disease - COVID-19	228	0.421074	1.51643	0.00254453	0.0218294	0.0175509	5066	tags=64%, list=27%, signal=47%	5582/1437/629/3627/717/3593/718/3444/3576/7124/1536/4314/51311/3558/713/6772/712/715/3442/2212/714/716/9636/730/720/140032/3445/719/4938/721/6347/100529239/729/728/3553/51284/6192/3439/834/5293/7113/4153/114548/4600/4940/4599/3455/4312/6403/64135/5603/4615/10379/25873/3456/6191/6187/7132/3441/3570/6203/9045/6136/6176/6202/7097/23586/3569/140801/6206/6232/6173/6130/6158/6235/6181/6168/2162/200916/…
hsa05221	Acute myeloid leukemia	67	0.42077	1.29519	0.0995475	0.334562	0.268989	2281	tags=22%, list=12%, signal=20%	1437/597/3562/8900/3684/6688/861/2322/11040/2209/1436/1848/1053/5293/6932
hsa05142	Chagas disease	101	0.418401	1.37068	0.0448113	0.198076	0.159254	3495	tags=37%, list=19%, signal=30%	3458/915/3593/718/2769/3576/916/917/7124/356/3558/713/712/919/6352/3586/5330/7046/714/6347/10333/6348/3553/355/5293/7043/5603/4615/3456/7042/7132/7097/3569/148022/3459/10000/8772
hsa00591	Linoleic acid metabolism	28	0.41826	1.09392	0.32914	0.668199	0.537234	2492	tags=32%, list=13%, signal=28%	30814/26279/8399/391013/246/64600/5319/84647/5321
hsa05120	Epithelial cell signaling in Helicobacter pylori infection	70	0.400375	1.24316	0.129754	0.400164	0.321733	3404	tags=24%, list=18%, signal=20%	2919/3576/2920/4233/2921/50617/6352/10392/5803/245972/4067/10312/5603/3579/526/6714/9020
hsa04115	p53 signaling pathway	71	0.400266	1.24068	0.135747	0.405994	0.326421	4298	tags=41%, list=23%, signal=31%	2810/1029/5366/5268/64065/637/355/3479/598/8797/7057/1643/11200/27113/6241/3732/7161/9540/51512/64393/581/1647/8795/896/595/841/51246/9133/1017
hsa05219	Bladder cancer	41	0.399969	1.11582	0.267974	0.600236	0.482592	3994	tags=37%, list=22%, signal=29%	4318/1029/3576/23604/1890/4313/7057/4312/6714/4609/1869/1870/1956/1612/595
hsa03440	Homologous recombination	37	0.387136	1.0558	0.38	0.716069	0.575723	5554	tags=49%, list=30%, signal=34%	5888/675/83990/50511/5932/5424/5890/29935/641/57804/146956/79728/80198/8438/7516/6118/6119/29086
hsa00512	Mucin type O-glycan biosynthesis	30	0.381496	1.0082	0.443011	0.78186	0.628619	3880	tags=40%, list=21%, signal=32%	11227/192134/442117/51301/51809/9334/114805/55808/2591/11226/79695/57452
hsa05162	Measles	138	0.380015	1.30079	0.0327456	0.168987	0.135866	4023	tags=41%, list=22%, signal=32%	6504/3561/915/3593/940/3310/3444/916/3559/3718/2213/917/356/3558/6772/3560/3442/637/3445/4938/3553/355/51284/3439/5293/598/4600/4940/4599/3455/4478/30835/3304/3552/27113/64135/4615/10379/3456/7161/6776/3441/7097/23586/3569/7128/10000/8772/581/4939/3661/6773/3665/896/595/841
hsa04666	Fc gamma R-mediated phagocytosis	93	0.379559	1.22422	0.122642	0.384434	0.309086	3489	tags=29%, list=19%, signal=24%	5582/5880/3055/653361/2213/5788/2209/7409/7454/2212/2214/8877/4067/2934/5293/5321/3635/273/382/8853/7408/10095/27040/81873/8936/10109/10000
hsa04210	Apoptosis	134	0.376291	1.28121	0.0455696	0.198076	0.159254	4236	tags=35%, list=23%, signal=27%	4914/330/597/1075/3562/1513/1512/5366/7124/356/1439/637/1520/3002/1521/355/79861/5293/4217/598/7277/8797/1509/7846/143/5551/27113/3710/7132/4000/824/8722/7185/9020/10000/8772/581/8743/1647/4001/8795/841/839/8837/840/153090/5970
hsa05135	Yersinia infection	134	0.375404	1.27819	0.0455696	0.198076	0.159254	3489	tags=30%, list=19%, signal=24%	2335/5880/3576/7124/7535/3558/3606/7409/7454/3586/2212/3932/6347/3937/3553/834/5293/29108/114548/3676/2185/920/7456/58484/5603/382/4615/3456/925/8935/10095/391/10458/3569/27040/6714/81873/148022/10109/10000
hsa05203	Viral carcinogenesis	165	0.374776	1.3082	0.039604	0.1927	0.154931	4525	tags=33%, list=24%, signal=25%	3135/718/1029/8900/1234/3718/3106/5366/3134/1237/1233/9586/3105/3107/245972/4067/7188/2934/3249/1030/5293/87/4791/5315/10379/3133/6776/84699/6672/7533/6714/7185/8379/581/2968/3661/23513/3665/896/890/2961/595/841/5922/5970/1017/6774/1108/5902/1111/5290/9261/5829/5966
hsa05202	Transcriptional misregulation in cancer	173	0.372961	1.31104	0.0389294	0.192288	0.1546	2216	tags=23%, list=12%, signal=21%	1437/1991/4914/51513/330/597/3562/4318/3576/5328/8900/3684/860/6688/861/4233/4314/171558/942/2322/7850/2209/3695/5079/3560/4804/8842/8938/8091/7490/1436/6692/3002/1848/6258/1053/958/7113/3479/598
hsa03050	Proteasome	45	0.37148	1.05632	0.339956	0.675943	0.54346	2297	tags=9%, list=12%, signal=8%	3458/5698/5696/5699
hsa04621	NOD-like receptor signaling pathway	177	0.371311	1.30519	0.0347394	0.174232	0.140083	2881	tags=30%, list=16%, signal=26%	2919/440068/330/64127/115362/1673/9447/2634/9051/3444/3576/2920/7124/1536/199713/260434/2921/3606/6772/64170/6352/3442/5330/10392/838/3445/2635/4938/5027/6347/7188/7226/91662/3553/3428/171389/3439/834/29108/51393/114548/598/4940/3455/10135/58484/8767/5603/4615/10379/837/3710/3456
hsa05130	Pathogenic Escherichia coli infection	195	0.36066	1.28093	0.0425	0.198076	0.159254	3864	tags=32%, list=21%, signal=26%	9071/64005/10381/9075/3576/7124/356/3071/10686/3606/27128/2212/4542/9076/5010/57121/23562/3553/355/3059/834/79861/29108/1364/114548/7277/147945/8797/84617/10382/7456/4642/7846/4628/2534/1366/5603/1365/382/4615/837/7132/4646/10095/3554/7100/9181/2017/10458/3569/79784/6714/81873/8936/10109/8772/581/6188/4643/8743/8795/100132463/5777
hsa05167	Kaposi sarcoma-associated herpesvirus infection	192	0.357057	1.26555	0.0527638	0.220526	0.177304	3843	tags=33%, list=21%, signal=26%	810/1437/2919/344807/3135/718/94235/3444/3576/3055/1234/3383/2920/3106/2921/942/3134/1237/1233/6772/3442/1230/9976/3105/3107/5743/131450/637/23533/3445/146850/4067/4277/355/3439/5293/2247/6932/3455/5603/10379/3133/3710/3456/7132/3441/3091/3569/6714/148022/3459/4609/1869/10000/8772/1870/581/4776/100507436/805/2793/3661/6773
hsa00565	Ether lipid metabolism	44	0.354726	0.996774	0.443694	0.78186	0.628619	2618	tags=27%, list=14%, signal=23%	30814/26279/8399/9514/122618/391013/64600/5319/56994/84647/5321/5050
hsa00360	Phenylalanine metabolism	17	0.354608	0.838622	0.680346	0.94197	0.757348	1942	tags=24%, list=11%, signal=21%	259307/222/221/137362
hsa00601	Glycosphingolipid biosynthesis - lacto and neolacto series	27	0.348222	0.900451	0.60587	0.914415	0.735193	2071	tags=19%, list=11%, signal=16%	2525/10331/2524/10690/2529
hsa04977	Vitamin digestion and absorption	23	0.344386	0.865632	0.681917	0.94197	0.757348	13	tags=4%, list=0%, signal=4%	5406
hsa00533	Glycosaminoglycan biosynthesis - keratan sulfate	14	0.343637	0.76733	0.767699	0.989209	0.795328	5885	tags=57%, list=32%, signal=39%	10164/8534/9435/93010/2530/2683/10678/4166
hsa04310	Wnt signaling pathway	158	0.342566	1.18754	0.100756	0.335167	0.269475	1656	tags=14%, list=9%, signal=13%	11197/147111/4316/5582/27121/7476/6423/80326/7472/5880/6424/284654/343637/85407/7475/85409/4919/5176/5330/144165/7484/11211
hsa05100	Bacterial invasion of epithelial cells	69	0.338766	1.05143	0.340045	0.675943	0.54346	5073	tags=48%, list=27%, signal=35%	2335/4233/859/79658/3059/5293/858/10459/26052/79767/857/10095/53358/391/2017/6714/81873/8936/1211/26084/10109/1759/10094/5290/5829/71/60/1495/25759/7414/1499/5295/6464
hsa04512	ECM-receptor interaction	88	0.338559	1.07637	0.283019	0.627647	0.504631	2445	tags=30%, list=13%, signal=26%	256076/2335/1277/3371/3381/7058/3914/1758/3691/3695/3673/6385/3675/3696/1278/7143/1293/3694/6696/3909/1311/3918/3676/961/7057/22801
hsa04110	Cell cycle	124	0.338435	1.13948	0.182741	0.479308	0.385366	4549	tags=31%, list=25%, signal=24%	2810/1029/8900/994/699/1030/11200/7043/4998/10459/4173/8318/4175/9088/7042/4174/23594/7533/4171/4609/1869/1032/1870/8379/1647/7040/1022/5111/896/890/9700/595/4085/4176/9133/1017/1111/8556/4172
hsa05205	Proteoglycans in cancer	202	0.337235	1.19748	0.0848329	0.303907	0.244342	3515	tags=29%, list=19%, signal=24%	3549/5582/7476/2335/1277/4060/80326/5329/7472/3593/4318/5328/2065/7124/4233/356/7475/3236/7409/3673/1634/6385/1278/10855/7484/11211/2316/355/859/3059/5293/2247/3479/7291/4313/815/117581/4478/7057/6237/858/5603/60495/286/7474/3710/7042/857/8826/2017/7097/3091/3316/6714/4609/10000/967/7473
hsa04630	JAK-STAT signaling pathway	162	0.329857	1.15037	0.139706	0.414037	0.332888	3621	tags=38%, list=20%, signal=31%	116379/1437/59067/3458/3561/3562/3593/3444/282618/3559/3718/3575/5008/6775/3558/3594/6772/1439/3560/9180/3442/282617/3586/149233/51561/50615/3445/11009/50616/338376/3574/5156/3439/5293/598/3566/3578/3587/3455/1489/8027/3601/10379/3953/3456/6776/7066/3976/3441/3570/9466/10401/3569/3459/4609/3565/10000/3600/3596/3597/6778
hsa04614	Renin-angiotensin system	23	0.326892	0.821661	0.75817	0.984715	0.791714	2924	tags=35%, list=16%, signal=29%	290/1359/1511/5972/186/4311/5476/116512
hsa04217	Necroptosis	133	0.326637	1.1112	0.222222	0.54515	0.438303	3851	tags=34%, list=21%, signal=27%	3458/81030/330/3444/3718/7124/1536/356/6775/6772/3442/637/3445/7188/246/3553/355/3439/834/29108/114548/8797/3455/815/2495/5321/3552/5836/10379/3456/6776/7132/3441/7128/824/2512/148022/3459/8772/6778/581/8743/8795/6773/283748
hsa04530	Tight junction	166	0.321456	1.12307	0.173697	0.471878	0.379391	4183	tags=34%, list=23%, signal=26%	910/909/913/911/9071/9075/861/1080/10686/7454/154796/9076/5010/23562/3059/8531/3996/79861/1364/4217/7277/87/4478/7846/4628/1366/79778/1365/11346/4214/53632/7408/10095/9181/2017/79784/6714/81873/57530/56288/10109/9414/103910/10398/10627/92359/5522/100132463/23513/84612/5111/595/7074/9080/149461/91862
hsa05163	Human cytomegalovirus infection	221	0.315066	1.13307	0.159601	0.440932	0.354511	3877	tags=32%, list=21%, signal=25%	5582/810/3135/5880/94235/1029/3444/3576/1234/3106/114/7124/356/3134/113/9586/6352/3442/1230/6890/5330/5731/567/3105/3107/5743/637/5732/3445/6351/6347/7188/5156/6348/3553/355/3439/5293/3587/2185/6891/388372/5603/3133/3710/3456/3579/7132/84699/7852/3441/3570/6376/3554/3569/6714/4609/1869/10000/8772/1870/581/4776/2771/805/11214/2793/1956/3661/6892
hsa04623	Cytosolic DNA-sensing pathway	60	0.313439	0.948299	0.529545	0.846234	0.680376	3288	tags=30%, list=18%, signal=25%	81030/3627/9447/3444/3606/6352/3442/3445/6351/3553/3439/834/29108/388372/3456/3441/23586/3569
hsa04933	AGE-RAGE signaling pathway in diabetic complications	99	0.312423	1.0162	0.408551	0.744065	0.598231	2909	tags=24%, list=16%, signal=21%	2335/1277/3576/3383/1281/7124/1536/113026/6772/5330/1278/7046/6347/50507/3553/5293/7412/4313/5333/7043/3552/5603/7042/6776
hsa03430	Mismatch repair	23	0.311194	0.782203	0.803922	0.996496	0.801187	5483	tags=52%, list=30%, signal=37%	5424/29935/5111/5984/9156/57804/5983/5982/3978/4436/6118/6119
hsa01040	Biosynthesis of unsaturated fatty acids	23	0.310556	0.7806	0.803922	0.996496	0.801187	2928	tags=17%, list=16%, signal=15%	6319/83401/11332/79993
hsa00062	Fatty acid elongation	23	0.309744	0.778557	0.803922	0.996496	0.801187	3144	tags=22%, list=17%, signal=18%	83401/284486/11332/79993/5538
hsa00980	Metabolism of xenobiotics by cytochrome P450	72	0.308586	0.960387	0.514541	0.842917	0.677709	1694	tags=21%, list=9%, signal=19%	222/29785/54657/131/3290/127/1545/27294/27306/221/7365/7363/874/221357/1553
hsa05160	Hepatitis C	156	0.307443	1.06617	0.310174	0.639979	0.514545	4150	tags=35%, list=22%, signal=28%	9071/3458/3627/9075/3444/7124/356/3949/10686/6772/3442/91543/9076/637/5010/3434/3445/4938/23562/355/3439/5293/1364/4600/4940/4599/3455/1366/1365/10379/439996/3456/7132/3441/7533/23586/148022/4609/1869/10000/8772/1870/581/4939/1956/5522/100132463/3661/6773/3665/595/841/8837/9080/149461
hsa04810	Regulation of actin cytoskeleton	216	0.300768	1.07853	0.244332	0.568946	0.457435	3637	tags=27%, list=20%, signal=22%	3645/2335/3630/2248/5880/3689/3684/3687/3071/3691/7409/3695/3673/2254/3675/3696/7114/2249/93408/3683/29895/3694/128239/57121/3681/26281/2934/9965/5156/2250/2253/5293/2247/3676/87/4478/22801/6237/4628/81624/8817/345456/7852/10095/3680/8826/10458/5305/79784/1133/6714/81873/8936/10109/3679/103910/54961/10398
hsa00590	Arachidonic acid metabolism	59	0.296796	0.891961	0.658371	0.94197	0.757348	2600	tags=31%, list=14%, signal=26%	30814/240/26279/247/27306/8399/5743/874/9536/6916/391013/246/64600/5319/5740/84647/5321/5742
hsa04510	Focal adhesion	198	0.296687	1.05371	0.309824	0.639979	0.514545	2505	tags=20%, list=14%, signal=18%	256076/5582/2335/1277/330/3371/5880/5923/3381/7058/3914/4233/64098/3691/7409/3695/3673/3675/3696/1278/7143/93408/1293/29895/3694/6696/2316/5156/3909/1311/3918/859/5293/7791/3479/3676/87/7057/22801/858
hsa05222	Small cell lung cancer	92	0.296082	0.954284	0.525581	0.846234	0.680376	3715	tags=26%, list=20%, signal=21%	79444/2335/330/3914/3673/3675/5743/7188/6258/3909/3918/1030/5293/598/1643/284217/1163/7185/4609/1869/10000/1870/581/1647
hsa04928	Parathyroid hormone synthesis, secretion and action	106	0.294723	0.968666	0.51358	0.842917	0.677709	1732	tags=11%, list=9%, signal=10%	5741/4322/5582/10568/8600/860/114/113/9586/5330/4325/5143
hsa05206	MicroRNAs in cancer	161	0.292752	1.01884	0.378713	0.716069	0.575723	3894	tags=27%, list=21%, signal=22%	5582/3371/1545/4318/1029/5328/2065/4233/5268/3236/8626/7143/5743/4325/8091/3162/994/6659/5156/5293/27165/2744/1946/7057/6768/4853/7042/8660/9493/3925/1942/4609/1869/7473/7329/1870/85414/113130/1956/7148/1945/1591/1786/2146
hsa05168	Herpes simplex virus 1 infection	488	0.292713	1.12155	0.0962567	0.330312	0.265572	2433	tags=11%, list=13%, signal=10%	4049/3118/3111/3135/3458/3117/3127/3119/3113/330/3123/3112/3122/3115/3593/8740/718/972/441234/3444/3106/728957/3108/7124/356/3134/6772/346171/64170/6352/3442/6890/25833/567/3105/3107/637/3445/4938/5452/6347/7188/29992/80264/170959/3553/355/3439/5293/163227/598/4940/3455/684/6891/148206
hsa05170	Human immunodeficiency virus 1 infection	204	0.29186	1.03833	0.33	0.668199	0.537234	3083	tags=22%, list=17%, signal=19%	5582/810/3135/915/5880/94235/3444/916/1234/3106/917/7124/356/3134/919/3442/6890/567/3105/3107/637/3445/200315/7188/140564/7133/60489/355/3439/5293/598/2185/684/164668/6891/920/25939/5603/4615/3133/3710/3456/7132/7852/3441
hsa04144	Endocytosis	241	0.28769	1.03715	0.35101	0.685682	0.551291	4134	tags=23%, list=22%, signal=18%	3135/3561/3310/3559/1234/3106/3949/3134/27128/3560/3105/7046/3107/2350/138429/5156/859/30846/409/80223/7456/8027/858/273/3304/440073/116985/26052/382/3133/8853/23362/3579/857/7852/11031/10095/6714/81873/84440/1211/56288/3482/10109/1759/6642/56904/1956/9744/84612/6455/5662/64750/5371/116988
hsa04071	Sphingolipid signaling pathway	119	0.2876	0.965856	0.507538	0.842917	0.677709	2965	tags=18%, list=16%, signal=16%	5582/2205/5880/7124/2206/5330/2207/637/8877/134/8698/5293/166929/4217/259230/1509/9294/2534/5603/140/10715/7132
hsa00830	Retinol metabolism	65	0.285132	0.876876	0.695749	0.953001	0.766217	1318	tags=15%, list=7%, signal=14%	195814/1592/10170/29785/54657/131/127/7365/5959/7363
hsa05165	Human papillomavirus infection	330	0.281365	1.03791	0.332468	0.66904	0.53791	2881	tags=21%, list=16%, signal=18%	256076/7476/2335/54626/1277/3135/80326/3371/7472/3444/8900/3381/3106/7058/3914/7124/356/7475/3134/3691/6772/50617/9586/3695/3673/3675/3442/3696/1278/3105/3107/7143/8638/9636/5743/1293/7484/3694/11211/3445/245972/3659/6696/3909/1311/355/3918/10312/3439/3996/5293/3676/4600/6932/4599/3455/3955/7057/22801/23493/4853/1292/1855/284217/5315/10379/3133/7474/3456
hsa03410	Base excision repair	33	0.280896	0.756923	0.843612	1	0.804004	5955	tags=52%, list=32%, signal=35%	143/5424/5111/5427/4350/57804/2237/3978/3146/10038/328/8930/5426/54107/7515/4968/27301
hsa04929	GnRH secretion	64	0.280076	0.860681	0.713024	0.968525	0.778698	2393	tags=19%, list=13%, signal=16%	5582/3783/1081/3763/5330/84634/3762/7224/6696/9568/5293/409
hsa04218	Cellular senescence	155	0.279558	0.969044	0.524752	0.846234	0.680376	4606	tags=32%, list=25%, signal=24%	810/3135/1029/3576/8900/3106/3134/3105/7046/3107/1030/5293/83593/6237/11200/4605/7043/3552/677/5603/3133/3710/7042/3569/824/4609/1869/10000/1870/4776/1647/7040/805/147746/896/890/595/5970/9133/91860/1017/823/1111/5290/9261/1978/22808/6009/8878
hsa04926	Relaxin signaling pathway	128	0.27947	0.949153	0.57072	0.894493	0.719176	1392	tags=12%, list=8%, signal=11%	4322/1277/51289/4318/2769/3640/94235/1281/114/122042/113/9586/5330/1278/7046
hsa05132	Salmonella infection	249	0.279033	1.00636	0.419192	0.75086	0.603695	3765	tags=26%, list=20%, signal=21%	330/10381/113146/3576/6281/399/7124/23643/5788/3071/3606/302/27128/10392/93408/29895/838/338382/147700/2316/10333/3553/834/79861/5293/29108/114548/7277/6932/8797/84617/10382/6237/7846/58484/8767/345456/5603/382/4615/837/929/7132/79026/4646/10095/7100/391/29109/7097/3569/81873/4609/26084/10109/10000/8772/103910/581/10398/6188/8743/10627/7295
hsa05220	Chronic myeloid leukemia	76	0.276339	0.86569	0.728929	0.981946	0.789489	4236	tags=26%, list=23%, signal=20%	1029/861/7046/5293/598/1643/7043/7042/6776/53358/4609/1869/10000/1870/581/1647/7040/595/9846/5970
hsa05131	Shigellosis	216	0.276026	0.989809	0.463476	0.795227	0.639366	4531	tags=31%, list=25%, signal=24%	1437/3101/718/3576/7124/113026/3606/27128/6352/5330/10392/93408/29895/7188/3553/3059/834/5293/29108/114548/598/87/5333/58484/8767/345456/5603/382/4615/837/831/3710/3456/929/7132/10095/3554/7100/9181/2017/824/6714/81873/8936/10109/10000/11335/103910/581/10398/10627/1956/3661/23048/64121/375189/5216/10318/5970/7311/10094/1729/6093/823/5290/5829/7321
hsa05161	Hepatitis B	161	0.274155	0.954116	0.581683	0.899433	0.723148	3913	tags=30%, list=21%, signal=24%	5582/4318/3444/3576/8900/3718/7124/356/6775/6772/9586/3442/7046/637/3445/355/3439/5293/2185/1643/7043/64135/5603/4615/4214/3456/7042/6776/84699/3441/7097/23586/3569/6714/148022/4609/1869/10000/8772/1870/6778/581/4776/7040/3661/6773/5111/3665/890
hsa04151	PI3K-Akt signaling pathway	352	0.272686	1.01463	0.392573	0.723567	0.581751	2445	tags=21%, list=13%, signal=18%	256076/2335/3630/1277/2248/4914/3561/930/3371/23566/3562/94235/3444/3559/3381/3718/2065/3575/7058/3914/4233/356/2069/5008/2322/3558/3691/9586/3695/3673/3560/9180/2254/3675/3442/4804/3696/1278/7143/2249/1435/1293/23533/8115/3694/3445/57121/146850/1436/3574/26281/9623/6696/9965/5156/2250/3909/2253/1311/3918/7039/3439/23678/5293/2247/3479/598/3566/3676/3455/1946/7057/22801
hsa05215	Prostate cancer	97	0.271822	0.880271	0.707143	0.964555	0.775506	2281	tags=14%, list=12%, signal=13%	3645/3630/4318/5328/4314/7850/9586/6692/5156/7039/5293/7113/3479/6932
hsa04014	Ras signaling pathway	227	0.270388	0.973613	0.529412	0.846234	0.680376	2610	tags=20%, list=14%, signal=18%	5582/30814/810/3630/26279/2248/4914/5880/94235/5923/4233/356/7535/2322/9610/2254/4804/2249/1435/8399/3363/1436/391013/26281/64600/9965/5156/5319/115727/10125/2250/2253/7039/5293/2247/83593/3479/598/1946/64926/84647/6237/5321/1969/2902/8817
hsa05214	Glioma	75	0.270376	0.844844	0.784091	0.996496	0.801187	4256	tags=28%, list=23%, signal=22%	5582/810/1029/5156/7039/5293/3479/815/1643/53358/814/1869/10000/1870/581/1647/805/1956/595/5154/91860
hsa04370	VEGF signaling pathway	59	0.266669	0.801422	0.848416	1	0.804004	2854	tags=15%, list=15%, signal=13%	5582/5880/9047/5743/8877/5293/5321/5603/7867
hsa05230	Central carbon metabolism in cancer	69	0.264739	0.821672	0.798658	0.996496	0.801187	3489	tags=28%, list=19%, signal=22%	4914/3101/4233/2322/6510/5979/5156/5293/27165/2744/9123/5315/3939/3091/8140/9997/4609/6513/10000
hsa00100	Steroid biosynthesis	20	0.264196	0.64362	0.938596	1	0.804004	3856	tags=30%, list=21%, signal=24%	8435/3988/1718/6307/1056/1591
hsa05200	Pathways in cancer	525	0.260385	0.998053	0.454039	0.794076	0.63844	2842	tags=21%, list=15%, signal=18%	5582/7476/79444/2335/810/3458/2248/4914/3561/330/80326/23566/7472/3562/3593/5880/4318/94235/1029/3444/3576/3559/8900/3718/6688/3575/3914/114/5366/861/4233/356/7475/2322/6775/3558/11040/3594/113/6772/1439/3673/3560/2254/3675/3442/5330/5731/149233/7046/2249/5743/637/1630/5732/51561/221357/7484/23604/11211/3445/57121/3162/1436/112399/5979/3574/26281/7188/6258/9965/5156/115727/10125/2250/3909/2253/35…
hsa04611	Platelet activation	122	0.257403	0.865152	0.792405	0.996496	0.801187	2984	tags=23%, list=16%, signal=19%	1277/1281/114/83706/113/695/3673/2212/5330/1278/2207/23533/6916/146850/4067/5023/10125/54518/3937/5293/64805/5321/5742/2534/8673/5603/3710/7408
hsa04721	Synaptic vesicle cycle	78	0.255958	0.806652	0.849099	1	0.804004	2771	tags=19%, list=15%, signal=16%	6857/6572/6530/6616/6570/50617/6534/245972/6539/6571/10312/112755/23025/6512/26052
hsa05418	Fluid shear stress and atherosclerosis	136	0.255313	0.875413	0.761194	0.984719	0.791718	3203	tags=21%, list=17%, signal=18%	810/3458/5880/4688/4318/3383/653361/7124/7850/6385/221357/3162/6347/3553/859/5293/7412/4217/4313/2949/858/3552/5603/90/7132/857/4257/3554/9181
hsa04010	MAPK signaling pathway	292	0.25307	0.927332	0.679198	0.94197	0.757348	2965	tags=23%, list=16%, signal=20%	5582/3630/2248/4914/5778/5880/27092/5923/3310/786/1852/2065/7124/4233/356/2069/2322/1847/2254/4804/7046/2249/1435/3556/1844/59285/1436/994/26281/1848/2316/9965/5156/115727/10125/2250/2253/3553/355/7039/5971/2247/3479/4217/9064/1946/409/6237/1846/5321/84867/1969/8817/11184/7043/3304/3552/4791/5603/5921/4615/2323/7867/4214/7042/929/7132
hsa05218	Melanoma	72	0.250702	0.780239	0.897092	1	0.804004	2610	tags=21%, list=14%, signal=18%	2248/1029/4233/2254/2249/26281/9965/5156/2250/2253/5293/2247/3479/1643/8817
hsa05216	Thyroid cancer	37	0.250078	0.682013	0.948889	1	0.804004	3994	tags=27%, list=22%, signal=21%	4914/5979/6258/6932/1643/4609/581/1647/7170/595
hsa04015	Rap1 signaling pathway	207	0.249495	0.88901	0.815657	1	0.804004	2752	tags=21%, list=15%, signal=18%	5582/810/3630/2248/23566/5880/3689/3684/114/4233/113/7409/2254/4804/5330/2249/1435/3683/2357/57121/1436/8631/26281/9965/5156/2250/54518/2253/3937/1813/5293/2247/83593/3479/1946/6494/7057/6237/1969/2902/8817/345456/5603
hsa05212	Pancreatic cancer	76	0.246129	0.771051	0.91344	1	0.804004	3800	tags=25%, list=21%, signal=20%	5880/1029/6772/7046/7039/5293/598/1643/5888/675/7043/7042/1869/10000/1870/581/1647/7040/1956
hsa04622	RIG-I-like receptor signaling pathway	68	0.245295	0.759681	0.905618	1	0.804004	4236	tags=35%, list=23%, signal=27%	3627/3593/3444/3576/7124/3442/9636/3445/338376/3439/64135/5603/4214/3456/3441/54941/23586/8772/79132/3661/3665/841/10010/5970
hsa01524	Platinum drug resistance	71	0.24385	0.755847	0.934389	1	0.804004	2370	tags=15%, list=13%, signal=14%	330/1029/5366/356/637/221357/355/5293/4217/598/2949
hsa04710	Circadian rhythm	30	0.240694	0.636097	0.944086	1	0.804004	3477	tags=20%, list=19%, signal=16%	406/8553/79365/9572/53632/6096
hsa05223	Non-small cell lung cancer	72	0.240563	0.748685	0.941834	1	0.804004	4046	tags=26%, list=22%, signal=21%	5582/1029/3718/4233/5979/6258/7039/5293/83593/1643/6776/1869/10000/1870/581/1647/1956/595/3082
hsa03420	Nucleotide excision repair	46	0.238156	0.681171	0.950893	1	0.804004	5795	tags=48%, list=31%, signal=33%	1643/5887/5424/29935/1022/2968/5111/5427/5984/2074/57804/5983/5982/3978/7508/6118/9978/6119/5426/54107/902/2067
hsa05410	Hypertrophic cardiomyopathy	90	0.237142	0.759675	0.935035	1	0.804004	3810	tags=34%, list=21%, signal=27%	27092/786/7124/3691/3695/3673/3675/3696/59285/3694/3479/3676/22801/70/4607/1756/7043/284217/53632/7042/4000/3680/7139/3569/6543/3679/93589/7171/7040/183/1906
hsa00240	Pyrimidine metabolism	57	0.233792	0.697301	0.959184	1	0.804004	3518	tags=23%, list=19%, signal=19%	100526794/4860/7378/1890/4907/377841/6241/129607/318/7298/7083/1806/151531
hsa04072	Phospholipase D signaling pathway	144	0.228591	0.784861	0.970149	1	0.804004	2835	tags=19%, list=15%, signal=16%	3630/2205/23566/3576/114/2206/113/2915/27128/2914/5330/2207/23533/8877/57121/146850/5156/5293/2185/6237/5321/2534/1606/26052/382/2917/5737
hsa04722	Neurotrophin signaling pathway	118	0.224921	0.752272	0.974937	1	0.804004	3759	tags=18%, list=20%, signal=14%	810/4914/356/398/4804/4794/5293/4217/815/4145/8767/3656/5603/4214/7161/53358/814/10000/4909/581/805
hsa00520	Amino sugar and nucleotide sugar metabolism	47	0.224681	0.64184	0.970787	1	0.804004	3576	tags=17%, list=19%, signal=14%	1118/3101/2582/5973/7264/3074/80896/6675
hsa00531	Glycosaminoglycan degradation	19	0.222146	0.531495	0.988962	1	0.804004	4115	tags=26%, list=22%, signal=20%	10855/60495/3074/8692/3423
hsa04520	Adherens junction	66	0.220211	0.677648	0.977578	1	0.804004	4950	tags=39%, list=27%, signal=29%	5880/4233/7454/7046/5792/6932/87/2534/8826/10458/4008/6714/8936/56288/5797/1956/5777/1460/3480/117178/71/60/1495/7414/1499/81
hsa04130	SNARE interactions in vesicular transport	33	0.212527	0.572691	0.977974	1	0.804004	14554	tags=100%, list=79%, signal=21%	112755/8673/6809/415117/8674/6810/10791/9341/8675/9342/55850/8417/9482/6845/6804/10228/8773/6844/6811/10282/53407/51272/143187/8676/9554/10490/9527/10652/9570/55014/2054/662/6843
hsa03040	Spliceosome	134	0.211532	0.720233	0.992405	1	0.804004	6380	tags=37%, list=35%, signal=24%	3310/5356/3304/84991/6628/25949/11157/343069/3178/3183/8559/3303/51639/51690/6633/100534599/10465/56949/6635/6632/10992/2521/27316/8175/57819/9775/22827/55696/6429/6626/51503/24148/153527/56259/10262/9410/23450/22938/151903/23451/10713/6629/84321/6636/6432/51691/57461/10084/9092
hsa04330	Notch signaling pathway	53	0.210344	0.617013	0.979545	1	0.804004	3630	tags=19%, list=20%, signal=15%	23220/171558/3955/23493/4853/1855/151636/388585/9253/84441
hsa00600	Sphingolipid metabolism	46	0.209	0.597777	0.988839	1	0.804004	3318	tags=22%, list=18%, signal=18%	9514/8877/339221/768239/166929/259230/7357/10715/8560/5660
hsa03460	Fanconi anemia pathway	49	0.195898	0.565191	0.993243	1	0.804004	4598	tags=29%, list=25%, signal=22%	5888/675/83990/2178/2177/116028/55215/29935/2175/29089/641/2189/146956/79728
hsa03020	RNA polymerase	31	0.175144	0.468918	1	1	0.804004	15243	tags=100%, list=83%, signal=18%	548644/10623/246721/64425/5435/5438/5433/30834/661/5437/5434/51082/5441/5432/5439/11128/5440/5431/221830/84172/5436/10622/9533/84265/25885/5430/10621/55718/171568/51728/55703
hsa00513	Various types of N-glycan biosynthesis	38	0.169408	0.465983	1	1	0.804004	3179	tags=16%, list=17%, signal=13%	338707/11282/283358/7991/64377/3074
hsa04114	Oocyte meiosis	123	0.160607	0.541732	1	1	0.804004	2875	tags=10%, list=16%, signal=8%	810/3630/114/5241/113/699/3479/815/10459/5603/9088/3710
hsa05211	Renal cell carcinoma	65	0.146366	0.450124	1	1	0.804004	3721	tags=15%, list=20%, signal=12%	4233/112399/7039/5293/7043/7042/3091/6513/10000/7040
hsa04137	Mitophagy - animal	66	0.138071	0.424882	1	1	0.804004	4606	tags=20%, list=25%, signal=15%	338382/598/6237/10133/285973/3091/6714/1869/5970/7311/1460/22808/8878
hsa04120	Ubiquitin mediated proteolysis	135	0.123426	0.421519	1	1	0.804004	5170	tags=20%, list=28%, signal=15%	79444/330/26232/90293/9246/1643/7325/4214/134111/11065/10401/7329/64750/5371/7311/55585/7318/7320/23295/7321/997/9820/9039/10054/6233/329/140739
hsa04932	Non-alcoholic fatty liver disease	146	-0.158046	-0.519849	1	1	0.804004	6831	tags=47%, list=37%, signal=30%	4713/4696/54539/4704/9021/1347/5465/4695/7381/1327/5562/4697/10975/4729/27089/3643/4711/5565/5313/1329/6256/4731/9377/6391/6389/55967/4709/7388/4720/4702/2081/1345/4694/4707/4718/29796/7385/4719/440567/7386/4700/6392/1337/1537/56901/341947/22877/4708/1346/1649/1351/4698/5599/3952/5563/1349/9451/3725/84701/2353/79602/54205/5602/8503/1050/208/170712/3667
hsa03008	Ribosome biogenesis in eukaryotes	73	-0.166874	-0.498955	1	1	0.804004	14232	tags=97%, list=77%, signal=22%	51096/1460/10248/10171/29889/10556/84128/55651/1459/3692/28987/10482/27341/55272/10813/10607/26354/55127/51602/55505/51068/6949/166378/5901/55226/10557/51119/4931/1736/29107/54433/2091/65083/10436/57455/92856/5822/10199/10528/23560/55813/9790/54464/23160/7514/55916/22803/10799/1457/23195/10940/134430/51077/138716/10775/10885/83732/29102/55341/55781/84135/55131/54913/51367/56001/54552/9724/283106/…
hsa04150	mTOR signaling pathway	152	-0.192661	-0.637952	1	1	0.804004	2529	tags=11%, list=14%, signal=9%	2887/8322/534/8503/208/6446/8326/8325/27330/5578/3667/253314/64798/7481/54361/89780
hsa03013	RNA transport	163	-0.193919	-0.646224	0.998319	1	0.804004	5060	tags=13%, list=27%, signal=9%	65109/9883/11102/51367/11171/1983/56001/8672/340529/11260/5042/55520/140886/8892/55998/56000/91181/253314/1917/728343/645974
hsa04140	Autophagy - animal	135	-0.197961	-0.648617	0.996689	1	0.804004	2266	tags=14%, list=12%, signal=12%	83734/5568/84938/5599/7189/5563/9451/5588/9110/5602/8503/208/58476/3667/596/5567/64798/3708/8471
hsa05020	Prion disease	246	-0.209068	-0.732457	1	1	0.804004	4698	tags=25%, list=25%, signal=19%	733/4718/29796/7385/4719/440567/7386/4851/4700/64764/6392/1337/3306/1537/56901/341947/6263/4708/5568/1346/112714/6300/1649/292/291/1351/4698/5599/776/116443/1349/283106/7419/9451/84701/81027/143471/732/7278/1958/54205/5602/8503/51807/90993/113457/170712/347688/3309/10105/347733/2904/5567/774/3798/3800/731/4684/3708/6262/2905
hsa04012	ErbB signaling pathway	83	-0.211315	-0.642925	0.987654	1	0.804004	2731	tags=17%, list=15%, signal=14%	5599/5579/3725/868/56924/9542/3084/5602/8503/2066/208/10718/5578/1950
hsa04136	Autophagy - other	31	-0.211356	-0.540639	0.990689	1	0.804004	8612	tags=55%, list=47%, signal=29%	9140/9474/5289/23192/2475/9706/5515/57521/23710/30849/9776/84971/55062/55102/115201/83734/84938
hsa00564	Glycerophospholipid metabolism	89	-0.21262	-0.654018	0.986038	1	0.804004	3836	tags=22%, list=21%, signal=18%	55326/8681/1607/139189/162466/5337/253558/54947/5320/9926/23171/2819/1608/56895/255189/43/50487/57678/9162/64850
hsa01521	EGFR tyrosine kinase inhibitor resistance	79	-0.212745	-0.643378	0.980496	1	0.804004	2450	tags=14%, list=13%, signal=12%	9542/3084/8503/208/7422/80310/3791/5578/596/253314/1950
hsa04914	Progesterone-mediated oocyte maturation	95	-0.214494	-0.664165	0.991228	1	0.804004	3908	tags=21%, list=21%, signal=17%	25847/4342/85417/5568/6300/388333/5599/80315/22849/115/108/993/5602/8503/208/111/27330/107/2770/5567
hsa05210	Colorectal cancer	86	-0.215117	-0.658014	0.986111	1	0.804004	3417	tags=17%, list=18%, signal=14%	5599/8313/7048/3725/4616/2353/5881/10912/54205/5602/8503/208/596/83439/1950
hsa05010	Alzheimer disease	340	-0.21952	-0.792642	0.990369	1	0.804004	4663	tags=23%, list=25%, signal=18%	55062/4718/29796/55102/7385/4719/440567/7386/7482/4700/6392/1337/1537/51384/56901/23236/341947/10313/6263/3028/4708/488/1346/112714/7976/324/1649/292/291/4040/1351/4698/5599/8313/776/1349/489/283106/7419/9451/84701/81027/143471/122011/8322/5332/163688/7278/54205/5602/8503/4023/51807/208/6622/113457/170712/347688/1131/10105/8326/347733/8325/10888/4842/2904/3667/22943/1128/7481/1139/3798/3800/3708/…
hsa00603	Glycosphingolipid biosynthesis - globo and isoglobo series	15	-0.220106	-0.478545	0.994393	1	0.804004	3043	tags=53%, list=16%, signal=45%	8706/2717/2523/6483/6489/10317/6482/127550
hsa04066	HIF-1 signaling pathway	107	-0.224409	-0.711371	0.981481	1	0.804004	2081	tags=14%, list=11%, signal=13%	285/284/387712/8503/208/7422/2321/5578/596/2027/160287/253314/80201/51378/1950
hsa05225	Hepatocellular carcinoma	165	-0.22655	-0.756631	0.976589	1	0.804004	3767	tags=19%, list=20%, signal=15%	7976/324/8110/4040/8313/5579/6595/7048/1021/8193/2948/4616/122011/7296/8322/2940/10912/8503/208/8326/8325/5578/7015/2947/1728/83439/7481/2938/54361/89780/3481
hsa00514	Other types of O-glycan biosynthesis	44	-0.226672	-0.624717	0.97491	1	0.804004	2364	tags=11%, list=13%, signal=10%	374378/84620/55568/50614/6480
hsa04146	Peroxisome	82	-0.2291	-0.693221	0.975	1	0.804004	5524	tags=35%, list=30%, signal=25%	3418/1384/25824/92960/84188/373156/83594/51179/5193/5264/5189/2181/84769/23417/26061/255027/5827/54677/5052/283927/1962/8309/3295/11264/2180/8800/23600/51555/23305
hsa00532	Glycosaminoglycan biosynthesis - chondroitin sulfate / dermatan sulfate	20	-0.241902	-0.565543	0.981685	1	0.804004	6404	tags=40%, list=35%, signal=26%	79586/9469/11285/55501/50515/113189/10090/55790
hsa05017	Spinocerebellar ataxia	139	-0.242624	-0.79515	0.923205	1	0.804004	3607	tags=24%, list=20%, signal=20%	2081/2906/5649/55062/55102/342371/773/3748/23236/488/292/291/92552/5599/10939/5579/116443/489/7419/143471/7222/5332/2911/54205/5602/8503/208/10105/3752/5578/2904/7436/3708/2905
hsa04921	Oxytocin signaling pathway	152	-0.252638	-0.836553	0.838384	1	0.804004	3681	tags=24%, list=20%, signal=20%	8681/59283/340156/85366/776/5579/10368/5563/4775/4208/781/3725/2977/5332/115/2778/4881/163688/1827/91807/2353/57118/108/111/783/27091/255189/5578/55799/107/2770/5567/3760/9254/3708/6262/785
hsa05022	Pathways of neurodegeneration - multiple diseases	444	-0.253582	-0.929159	0.717742	0.970887	0.780597	4663	tags=24%, list=25%, signal=19%	55062/4718/29796/55102/7385/4719/440567/4294/342371/7386/7327/7482/4700/6392/1337/1537/51384/56901/23236/341947/6263/3028/4708/1767/488/1346/112714/6300/7976/324/1649/292/291/92552/4040/1351/4698/5599/8313/776/5579/55567/1349/489/283106/83544/9217/7419/9451/84701/1768/81027/143471/122011/2878/8322/7222/5332/163688/7278/56171/201625/2911/7802/54205/5602/51807/1770/6622/113457/170712/196385/347688/…
hsa04390	Hippo signaling pathway	154	-0.253749	-0.843605	0.826667	1	0.804004	1991	tags=11%, list=11%, signal=10%	3397/151449/5521/8326/656/8325/174/29119/392255/83439/7481/1496/1740/166824/54361/89780/353500
hsa04141	Protein processing in endoplasmic reticulum	162	-0.253872	-0.846106	0.841751	1	0.804004	7372	tags=47%, list=40%, signal=28%	8720/11231/10134/23480/578/10905/7993/6185/29927/4780/7322/10802/64374/56681/91445/133022/23193/10960/10961/1410/10952/6745/10294/440275/10113/10956/55432/9632/51619/3305/64215/6184/27248/9871/3703/51128/2081/10970/54431/22872/80331/1650/80267/56886/7327/84447/201595/51009/10483/79748/3306/6238/1649/5034/6400/7095/92552/5599/57134/2923/51726/9451/821/9709/10130/5611/811/9601/50613/5602/7184/28512…
hsa03022	Basal transcription factors	44	-0.254072	-0.700231	0.919355	1	0.804004	6452	tags=32%, list=35%, signal=21%	2965/6884/6873/2960/2957/129685/6882/2068/138474/6875/2969/728340/2966/11036
hsa04070	Phosphatidylinositol signaling system	95	-0.257188	-0.796365	0.868421	1	0.804004	3718	tags=22%, list=20%, signal=18%	5286/3636/1607/3632/89869/139189/5287/5579/51196/3613/5332/163688/9110/8503/1608/5288/5578/84812/117283/3708/9162
hsa04392	Hippo signaling pathway - multiple species	28	-0.25823	-0.643987	0.952381	1	0.804004	5283	tags=36%, list=29%, signal=26%	83937/92597/5058/25937/8994/79981/7004/26524/79633/166824
hsa04917	Prolactin signaling pathway	70	-0.262293	-0.776326	0.877477	1	0.804004	2282	tags=14%, list=12%, signal=13%	2353/8835/5602/8503/208/1447/1586/5617/3973/2645
hsa04360	Axon guidance	179	-0.263642	-0.891953	0.733777	0.984409	0.791468	2748	tags=17%, list=15%, signal=14%	6608/285220/655/5365/7223/57556/56924/7222/6092/6585/91653/5881/2047/8503/151449/27289/137970/7225/5578/80031/57689/2770/2046/84628/4917/6469/54361/2044/2045/223117
hsa00515	Mannose type O-glycan biosynthesis	19	-0.266684	-0.613346	0.967213	1	0.804004	1782	tags=58%, list=10%, signal=52%	79147/55624/10585/84197/11041/135152/9486/84892/29954/148789/146664
hsa04068	FoxO signaling pathway	130	-0.268991	-0.874446	0.737896	0.984715	0.791714	3417	tags=15%, list=18%, signal=13%	5599/5563/7048/51701/9456/100132074/4616/2308/10912/2911/5602/8503/208/6446/3667/6517/1950/5896/8471/5897
hsa01522	Endocrine resistance	95	-0.269751	-0.835265	0.798246	0.996496	0.801187	3815	tags=23%, list=21%, signal=18%	5568/6300/2100/638/5599/1565/54567/3725/4855/115/2778/2353/108/5602/8503/208/2852/111/107/596/5567/10683
hsa00562	Inositol phosphate metabolism	73	-0.275719	-0.824403	0.794275	0.996496	0.801187	3718	tags=25%, list=20%, signal=20%	22908/23236/5286/3636/3632/89869/5287/51196/9651/3613/5332/27124/9110/4329/23007/5288/84812/55586
hsa04915	Estrogen signaling pathway	137	-0.277918	-0.913684	0.639669	0.930947	0.748485	2438	tags=22%, list=13%, signal=19%	5332/115/2778/163688/2353/2911/108/8503/90993/7184/208/2852/111/7031/54474/107/342574/596/2770/5567/3760/192666/3883/4988/162605/353288/3708/8687/3886/147183
hsa05224	Breast cancer	147	-0.27958	-0.921222	0.631933	0.930947	0.748485	3050	tags=20%, list=17%, signal=17%	1021/54567/23462/3725/3280/672/8823/4616/122011/4855/8322/8822/2255/2353/10912/8503/208/2324/8326/2251/8325/2252/83439/7481/10683/1950/3815/54361/89780/26291
hsa03018	RNA degradation	75	-0.281606	-0.84533	0.756228	0.984715	0.791714	3919	tags=21%, list=21%, signal=17%	10766/2026/9924/340529/3313/7832/115752/5042/140886/131870/5213/54766/387712/10140/2027/645974
hsa05412	Arrhythmogenic right ventricular cardiomyopathy	77	-0.283391	-0.853385	0.74911	0.984715	0.791714	3830	tags=29%, list=21%, signal=23%	488/3674/59283/776/10368/8516/781/489/8515/1000/3672/783/27091/29119/55799/6445/9254/83439/6444/6262/1496/785
hsa00190	Oxidative phosphorylation	105	-0.284493	-0.901254	0.655462	0.94197	0.757348	7366	tags=59%, list=40%, signal=36%	64077/10063/4712/8992/4705/4722/4713/4696/54539/4704/1347/4695/7381/1327/4697/10975/4729/27089/533/4711/51606/1329/4731/9377/6391/6389/55967/9114/4709/7388/4720/1353/4702/1355/1345/4694/4707/4718/29796/7385/4719/440567/90423/7386/4700/6392/1337/1537/56901/341947/4708/1346/1351/4698/127124/1352/1349/84701/534/170712/155066/495
hsa00510	N-Glycan biosynthesis	50	-0.286921	-0.811614	0.778369	0.996496	0.801187	7605	tags=48%, list=41%, signal=28%	4247/79796/29880/10905/6185/79868/10195/152586/23193/1798/6184/3703/1650/4245/440138/201595/56052/199857/4124/79087/57134/84620/146664/6480
hsa05414	Dilated cardiomyopathy	95	-0.286966	-0.888569	0.673684	0.94197	0.757348	3830	tags=31%, list=21%, signal=24%	488/5568/3674/59283/776/10368/8516/781/489/8515/115/2778/4633/153/108/3672/111/783/27091/4625/55799/107/4634/6445/5567/9254/6444/6262/785
hsa04216	Ferroptosis	41	-0.287201	-0.77556	0.819521	1	0.804004	2980	tags=20%, list=16%, signal=16%	2180/7419/2729/23657/84557/23516/440738/23305
hsa00430	Taurine and hypotaurine metabolism	11	-0.28741	-0.582181	0.954874	1	0.804004	3986	tags=55%, list=22%, signal=43%	570/84890/2686/339896/2572/2571
hsa01523	Antifolate resistance	30	-0.289485	-0.736477	0.852886	1	0.804004	1521	tags=13%, list=8%, signal=12%	6573/2352/9429/10257
hsa04720	Long-term potentiation	67	-0.290661	-0.855688	0.75	0.984715	0.791714	2438	tags=16%, list=13%, signal=14%	5332/163688/5502/2911/27330/5578/2904/107/5567/3708/2905
hsa04726	Serotonergic synapse	112	-0.291601	-0.933959	0.587459	0.899433	0.723148	1341	tags=14%, list=7%, signal=13%	255189/5578/2560/3354/2770/5567/3760/6532/774/121278/4129/1557/3708/3358/2562/2792
hsa05110	Vibrio cholerae infection	49	-0.293602	-0.82651	0.750896	0.984715	0.791714	2402	tags=16%, list=13%, signal=14%	115/2778/534/9601/3784/5578/155066/5567
hsa04742	Taste transduction	85	-0.296956	-0.906889	0.634146	0.930947	0.748485	2742	tags=26%, list=15%, signal=22%	50839/5028/6328/5332/259296/2911/2558/29850/5153/1131/50836/50834/50837/3354/259287/50835/5567/5024/80835/40/346562/80834
hsa05012	Parkinson disease	221	-0.299279	-1.02922	0.377704	0.716069	0.575723	4662	tags=26%, list=25%, signal=20%	4718/29796/7385/4719/440567/7386/7327/4700/6392/1337/1537/56901/341947/6263/4708/5568/1346/112714/1649/292/291/4128/1351/4698/5599/1349/1843/7419/9451/84701/81027/143471/2778/163688/7278/54205/5602/51807/6622/113457/170712/2774/347688/3309/111/10105/347733/7345/2770/5567/4129/6531/3798/3800/3708/4137/1812
hsa04962	Vasopressin-regulated water reabsorption	44	-0.301181	-0.830067	0.747312	0.984715	0.791714	5330	tags=34%, list=29%, signal=24%	1783/4905/84516/64764/79659/140735/554/5568/359/115/2778/90993/1780/5567/361
hsa05217	Basal cell carcinoma	63	-0.302795	-0.88438	0.675627	0.94197	0.757348	3832	tags=29%, list=21%, signal=23%	374654/7976/324/8313/8643/6608/2737/650/4616/8322/10912/8326/8325/83439/7481/6469/54361/89780
hsa05031	Amphetamine addiction	69	-0.304425	-0.897733	0.637838	0.930947	0.748485	3525	tags=29%, list=19%, signal=24%	4128/776/5579/116443/23237/3725/2778/163688/2353/90993/111/2893/5578/2904/5567/2354/4129/6531/1812/2905
hsa04924	Renin secretion	67	-0.306912	-0.903529	0.639286	0.930947	0.748485	2643	tags=24%, list=14%, signal=21%	2977/1636/5332/2778/4881/163688/153/117/5153/111/1907/2770/5567/1908/3708/185
hsa04550	Signaling pathways regulating pluripotency of stem cells	143	-0.307096	-1.0108	0.425497	0.757989	0.609426	2032	tags=15%, list=11%, signal=13%	9421/3397/8503/208/3399/3400/8326/8325/3670/4093/7547/7481/3977/3626/80712/3175/54361/2103/83729/89780/7044
hsa05231	Choline metabolism in cancer	95	-0.307561	-0.952339	0.538596	0.852342	0.685286	3681	tags=23%, list=20%, signal=19%	8681/1607/139189/5599/5579/5155/5337/3725/2353/5881/5602/8503/1608/208/80310/255189/5578/10810/80736/1950/9162/60482
hsa04750	Inflammatory mediator regulation of TRP channels	98	-0.30763	-0.961681	0.512864	0.842917	0.677709	2724	tags=24%, list=15%, signal=21%	5588/3827/5332/115/2778/163688/108/624/5602/8503/623/5581/111/41/5608/255189/5578/79054/107/5567/3708/3358/40/51802
hsa04213	Longevity regulating pathway - multiple species	62	-0.310898	-0.905669	0.645045	0.934599	0.751421	2514	tags=18%, list=14%, signal=15%	2308/115/108/8503/208/111/3667/107/5567/3170/8471
hsa04728	Dopaminergic synapse	132	-0.311749	-1.01869	0.411184	0.7447	0.598742	2438	tags=19%, list=13%, signal=17%	5332/2778/163688/2786/2353/5602/90993/208/2774/111/5521/2893/5578/2904/2770/5567/3760/774/4129/6531/3798/3800/3708/1812/2792
hsa04916	Melanogenesis	101	-0.315131	-0.986982	0.461938	0.795227	0.639366	2448	tags=22%, list=13%, signal=19%	8322/5332/115/2778/163688/1638/108/90993/111/8326/1910/7299/8325/5578/107/2770/5567/83439/7481/3815/54361/89780
hsa04744	Phototransduction	28	-0.315337	-0.786404	0.801905	0.996496	0.801187	4500	tags=32%, list=24%, signal=24%	1259/6011/2986/131890/2979/163688/2780/9626/2792
hsa05014	Amyotrophic lateral sclerosis	334	-0.316153	-1.13602	0.149425	0.427304	0.343554	5684	tags=29%, list=31%, signal=20%	5217/6391/6389/55967/9776/145957/4927/4709/493869/7388/116442/4720/5861/10126/4702/84516/9883/2081/2906/572/1345/4694/4707/2882/55062/4718/29796/55102/56001/7385/4719/440567/7386/4700/6392/1337/1537/56901/23064/341947/4708/1767/1346/112714/6300/1649/1351/4698/55567/1349/83544/9217/9451/84701/1768/81027/143471/2878/9542/7278/56171/3084/201625/50613/7802/54205/55998/51807/2066/1770/113457/170712/19…
hsa04152	AMPK signaling pathway	120	-0.316804	-1.02538	0.386139	0.719321	0.578337	3374	tags=21%, list=18%, signal=17%	3952/5563/2194/1374/5213/2308/148/3156/79602/8503/90993/208/5521/32/5468/3667/2998/3172/6517/5208/5207/8789/948/10891/8471
hsa00270	Cysteine and methionine metabolism	47	-0.318213	-0.885237	0.658887	0.94197	0.757348	3563	tags=32%, list=19%, signal=26%	587/2806/3945/113675/1789/3948/23743/4144/2729/23382/2805/4143/29968/1491/160287
hsa04730	Long-term depression	58	-0.31947	-0.928974	0.590426	0.899433	0.723148	2643	tags=31%, list=14%, signal=27%	1394/2895/773/23236/8681/5579/2977/5332/2778/2911/10842/1392/255189/5578/4842/5592/2770/3708
hsa00030	Pentose phosphate pathway	30	-0.322415	-0.820257	0.752328	0.984715	0.791714	4005	tags=27%, list=22%, signal=21%	2539/5226/9104/221823/8277/5213/5631/8789
hsa04211	Longevity regulating pathway	89	-0.324134	-0.997033	0.455497	0.794076	0.63844	2514	tags=17%, list=14%, signal=15%	2308/115/79602/108/8503/90993/208/111/5468/3667/107/253314/5567/10891/8471
hsa00480	Glutathione metabolism	54	-0.325712	-0.931792	0.57754	0.899433	0.723148	2886	tags=20%, list=16%, signal=17%	2948/2729/2878/2940/79094/26873/2880/257202/2947/2938/2877
hsa04931	Insulin resistance	106	-0.325858	-1.03381	0.371859	0.716069	0.575723	3547	tags=23%, list=19%, signal=18%	57761/5599/5579/5563/1374/5588/2308/5507/5602/8503/90993/208/5581/9882/27330/32/3667/5506/2998/6517/948/10999/10891/5837
hsa04371	Apelin signaling pathway	134	-0.326907	-1.07054	0.306425	0.639979	0.514545	3497	tags=22%, list=19%, signal=18%	4635/340156/85366/5563/4208/9759/2791/5332/115/163688/4633/91807/2786/1958/108/208/5346/5581/111/8862/4842/107/4634/2770/5567/3708/6262/10891/185/2792
hsa00250	Alanine, aspartate and glutamate metabolism	35	-0.326987	-0.863072	0.67148	0.94197	0.757348	4909	tags=43%, list=27%, signal=32%	2673/2875/57494/1373/2752/2806/2572/18/80150/2805/84706/443/8659/2571/284716
hsa04714	Thermogenesis	203	-0.329752	-1.12812	0.207516	0.524737	0.42189	7338	tags=56%, list=40%, signal=34%	152831/4878/10063/4712/4705/57521/1385/84987/2260/4722/51422/7350/6602/4713/4696/54539/4704/84335/6198/1347/4695/79133/7381/1327/5562/4697/10975/55744/4729/27089/285521/4711/5565/10818/6195/1329/4731/9377/6391/1386/6389/55967/4709/51241/7388/57492/7249/6655/4720/6654/8289/1353/4702/1355/1345/4694/29078/4707/4718/29796/55811/7385/4719/440567/7386/2181/4700/90639/64764/6392/1337/1537/56901/1376/341…
hsa04340	Hedgehog signaling pathway	46	-0.331468	-0.920995	0.583032	0.899433	0.723148	4241	tags=30%, list=23%, signal=24%	53944/1954/374654/5568/8643/6608/2737/122011/91653/596/5567/4036/50937/6469
hsa00982	Drug metabolism - cytochrome P450	67	-0.331774	-0.976721	0.494643	0.826941	0.664864	1283	tags=15%, list=7%, signal=14%	218/54659/7364/2947/4129/316/1557/2938/54578/574537
hsa04350	TGF-beta signaling pathway	92	-0.3327	-1.02849	0.379371	0.716069	0.575723	3284	tags=23%, list=18%, signal=19%	4092/7048/91/4091/2200/26585/655/650/3397/151449/3399/3400/656/25805/392255/2331/4093/3626/83729/353500/7044
hsa04723	Retrograde endocannabinoid signaling	141	-0.33305	-1.09542	0.26087	0.59471	0.478149	2927	tags=30%, list=16%, signal=25%	56901/23236/2788/2555/4708/5568/6300/4698/5599/776/5579/57406/2563/2791/2569/2166/5332/115/2570/2786/2911/108/2558/5602/1268/111/22999/2893/5578/2560/107/2565/2770/5567/3760/774/2566/55879/3708/2562/200959/2792
hsa00760	Nicotinate and nicotinamide metabolism	35	-0.334181	-0.88206	0.637184	0.930947	0.748485	3314	tags=31%, list=18%, signal=26%	64802/93034/23057/5167/56953/23409/23530/23475/554235/316/5169
hsa04020	Calcium signaling pathway	200	-0.337106	-1.14901	0.158678	0.440932	0.354511	3639	tags=31%, list=20%, signal=25%	3270/292/291/777/89869/340156/85366/776/5579/51196/5155/489/444/7419/146/8912/5332/115/2778/163688/148/91807/5257/6915/153/57118/2911/108/624/2066/623/2774/5153/1131/80310/3274/10105/8913/1910/5578/4842/107/492/84812/5567/1128/774/1129/5024/1139/9630/3708/6262/552/1950/3358/6870/185/3973/491/1812/2905
hsa00604	Glycosphingolipid biosynthesis - ganglio series	15	-0.340222	-0.739695	0.818692	1	0.804004	3043	tags=33%, list=16%, signal=28%	6489/9197/256435/6482/29906
hsa03015	mRNA surveillance pathway	96	-0.342587	-1.06438	0.315331	0.646528	0.519811	6465	tags=26%, list=35%, signal=17%	5501/65110/5528/55012/390748/2935/5526/29101/5519/65109/51585/100529063/10914/56001/64895/340529/5042/140886/55998/56000/5521/56903/728343/645974/4440
hsa05016	Huntington disease	279	-0.343521	-1.21277	0.0618729	0.243019	0.195388	5129	tags=28%, list=28%, signal=21%	10126/4702/84516/2081/1345/4694/6507/4707/2882/55062/4718/29796/55102/7385/4719/440567/6875/4294/7386/4700/64764/6392/1337/1537/56901/23236/341947/4708/1767/1346/112714/292/291/1351/4698/5599/55567/1349/83544/7419/8218/84701/1768/81027/143471/2878/5332/7278/56171/201625/7802/54205/5602/51807/90993/1770/113457/170712/196385/347688/8701/2880/257202/1769/10105/2893/347733/2904/5468/3766/64446/774/37…
hsa04961	Endocrine and other factor-regulated calcium reabsorption	53	-0.34416	-0.982213	0.478648	0.804325	0.646681	2888	tags=28%, list=16%, signal=24%	8218/482/5332/115/2778/624/5745/56302/5578/3816/492/5567/3817/491/478
hsa00071	Fatty acid degradation	42	-0.345533	-0.94251	0.554945	0.873971	0.702676	5381	tags=52%, list=29%, signal=37%	3032/3030/130/2639/81616/1892/2181/35/1376/1962/1632/34/501/1374/2180/223/38/23205/36/217/219/23305
hsa05204	Chemical carcinogenesis	78	-0.345876	-1.04346	0.351254	0.685682	0.551291	2979	tags=27%, list=16%, signal=23%	54577/2948/6817/79799/1543/2052/2940/10/54576/64816/218/6799/54659/7364/2947/1139/1557/2938/54578/574537/1646
hsa04270	Vascular smooth muscle contraction	131	-0.348065	-1.13263	0.207641	0.524737	0.42189	2724	tags=24%, list=15%, signal=20%	5588/146/2977/5320/5332/115/2778/4881/163688/10203/148/91807/108/5581/111/1907/255189/5578/107/50487/5592/5567/1908/4879/157855/797/3708/552/185/4880/10242
hsa04912	GnRH signaling pathway	93	-0.348194	-1.07907	0.288927	0.636421	0.511685	3815	tags=28%, list=21%, signal=22%	23236/2798/5568/6300/8681/5599/776/5579/5337/3725/5332/115/2778/163688/1958/108/5602/111/5608/255189/5578/107/2797/5567/3708/2488
hsa01212	Fatty acid metabolism	52	-0.348722	-0.993677	0.461947	0.795227	0.639366	5589	tags=48%, list=30%, signal=34%	7923/9374/3032/3030/81616/1892/31/2181/35/84869/1376/197322/64834/1962/2194/3295/34/1374/2180/54898/38/23205/36/9415/23305
hsa04910	Insulin signaling pathway	137	-0.349303	-1.14837	0.195041	0.500657	0.40253	2855	tags=21%, list=15%, signal=18%	5568/3636/3632/5599/5563/2194/3098/868/2308/163688/5257/8835/5507/5602/8503/208/32/3667/5506/2998/253314/6517/8789/80201/5567/10891/2645/5837/8471
hsa00970	Aminoacyl-tRNA biosynthesis	25	-0.350278	-0.861593	0.662879	0.94197	0.757348	9692	tags=68%, list=52%, signal=32%	118672/10352/57038/10056/23438/54938/80222/57176/55157/51091/55278/5188/124454/283459/10667/23395/92935
hsa05213	Endometrial cancer	58	-0.350436	-1.01902	0.416667	0.75046	0.603373	2542	tags=14%, list=14%, signal=12%	4616/10912/8503/208/29119/83439/1950/1496
hsa00010	Glycolysis / Gluconeogenesis	67	-0.352224	-1.03692	0.392857	0.723567	0.581751	3471	tags=28%, list=19%, signal=23%	5160/84532/3945/501/1738/3098/223/5213/3948/387712/217/219/218/2027/160287/8789/80201/2645/26330
hsa05034	Alcoholism	106	-0.352542	-1.11847	0.237856	0.566113	0.455157	2400	tags=16%, list=13%, signal=14%	2778/163688/2786/9734/90993/111/1392/2904/2770/5567/2354/4129/6531/1812/2905/2792/4852
hsa04024	cAMP signaling pathway	215	-0.352785	-1.21053	0.0912106	0.323203	0.259856	2402	tags=20%, list=13%, signal=18%	115/2778/4881/163688/5142/2353/153/5881/117/108/6752/5602/8503/90993/208/111/5144/2893/1907/10846/1260/10451/2904/107/492/3354/2770/5567/6750/1128/1908/10257/1129/6262/3973/491/1812/610/2905/6755/478/4852/2488
hsa04934	Cushing syndrome	155	-0.352988	-1.17256	0.147157	0.426611	0.342997	2572	tags=21%, list=14%, signal=18%	8912/8322/5332/115/2778/949/108/23746/90993/111/2516/3164/8326/8913/1392/8325/8622/3777/107/3283/50940/2770/5567/3776/3739/83439/56246/7481/1586/3708/185/54361/89780
hsa04725	Cholinergic synapse	113	-0.353345	-1.12943	0.222408	0.54515	0.438303	2438	tags=23%, list=13%, signal=20%	5332/115/2786/2353/3784/108/8503/90993/208/1131/111/5578/43/107/1137/596/2770/5567/3760/1128/774/1129/1139/3708/60482/2792
hsa05226	Gastric cancer	147	-0.353668	-1.16534	0.161345	0.442003	0.355372	2664	tags=19%, list=14%, signal=16%	8823/4616/5243/122011/8322/8822/2255/10912/8503/208/5915/8326/2251/8325/29119/596/7015/83998/2252/83439/7481/1950/1496/6469/54361/89780/26291/1045
hsa00230	Purine metabolism	122	-0.356171	-1.1536	0.177924	0.474485	0.381488	3040	tags=22%, list=16%, signal=19%	221823/5167/131870/56953/2977/5138/115024/122481/115/4881/5142/5631/108/9060/5149/5153/111/27115/5144/10846/8622/107/55821/50940/5169/9615/646625
hsa04970	Salivary secretion	91	-0.356481	-1.0978	0.268551	0.600236	0.482592	2658	tags=31%, list=14%, signal=26%	146/482/2977/5332/115/2778/163688/148/153/108/1131/111/278/1470/5578/4842/107/820/492/5592/5567/55503/3708/491/84569/3346/3347/478
hsa04080	Neuroactive ligand-receptor interaction	338	-0.356696	-1.28664	0.0145631	0.099053	0.079639	2336	tags=28%, list=13%, signal=24%	10203/148/9002/11255/2570/2587/2692/6915/134864/56923/153/117/2911/4985/6752/624/2558/319100/1268/623/256933/6343/1131/2147/5745/6344/2837/2689/3274/8862/2893/23620/59350/1910/1392/1907/10888/2904/2913/7433/9038/2560/5697/2797/2690/3354/1137/2898/9340/2565/1442/6750/1269/2832/1128/1908/1129/5024/2566/4988/1139/4543/55879/797/9287/4889/5617/552/3358/6870/2742/185/2562/83551/3973/200959/2900/1443/1…
hsa00350	Tyrosine metabolism	36	-0.357166	-0.949376	0.532977	0.847563	0.681444	3525	tags=42%, list=19%, signal=34%	4128/220074/2806/3242/8639/314/1638/2805/1621/7299/218/4129/316/3081/7173
hsa04960	Aldosterone-regulated sodium reabsorption	37	-0.357418	-0.955014	0.525362	0.846234	0.680376	1960	tags=19%, list=11%, signal=17%	8503/6446/5578/3667/3291/3758/478
hsa00983	Drug metabolism - other enzymes	78	-0.362857	-1.09468	0.268817	0.600236	0.482592	2979	tags=21%, list=16%, signal=17%	54577/7172/2948/79799/2940/10/54576/51733/1066/54659/7364/2947/2938/1807/54578/574537
hsa01210	2-Oxocarboxylic acid metabolism	19	-0.363461	-0.835924	0.688525	0.947084	0.76146	6318	tags=68%, list=34%, signal=45%	100526760/51166/1431/3418/3420/2875/3419/587/162417/2806/50/2805/84706
hsa04975	Fat digestion and absorption	39	-0.364511	-0.984323	0.468864	0.796093	0.640062	1288	tags=33%, list=7%, signal=31%	38/5320/64240/949/64241/84649/50487/948/10999/8513/335/80168/337
hsa04922	Glucagon signaling pathway	103	-0.3656	-1.15013	0.19105	0.494304	0.397422	2686	tags=20%, list=15%, signal=18%	5213/3948/2308/5332/2778/163688/5257/108/90993/208/32/2998/160287/5207/8789/5567/3708/10891/2645/5837/2642
hsa00340	Histidine metabolism	21	-0.366982	-0.868185	0.628676	0.930947	0.748485	3525	tags=52%, list=19%, signal=42%	4128/3034/501/223/26/10841/217/219/443/218/4129
hsa04261	Adrenergic signaling in cardiomyocytes	149	-0.367637	-1.2138	0.110738	0.353928	0.28456	3830	tags=30%, list=21%, signal=24%	488/5568/6300/59283/4635/776/10368/781/9252/489/11069/146/482/5332/115/2778/163688/148/4633/153/5502/3784/108/90993/208/6330/111/5521/783/27091/5578/4625/55799/107/4634/492/596/2770/5567/9254/6262/185/491/785/478
hsa04911	Insulin secretion	86	-0.370202	-1.1324	0.232639	0.56178	0.451673	2716	tags=27%, list=15%, signal=23%	2864/482/3782/5332/115/2778/3767/117/108/90993/1131/111/27445/5578/107/5567/157855/6262/2645/6833/10242/478/3651
hsa00220	Arginine biosynthesis	22	-0.371843	-0.890275	0.617375	0.927485	0.745702	4075	tags=41%, list=22%, signal=32%	1373/2752/162417/2806/383/384/2805/84706/4842
hsa04919	Thyroid hormone signaling pathway	121	-0.372254	-1.20462	0.13257	0.400164	0.321733	3491	tags=23%, list=19%, signal=19%	89869/5579/8850/51196/23389/489/5213/482/2308/4855/5332/1827/117247/8503/208/9882/5578/4625/84812/5208/6567/5567/10231/2626/1734/54361/1733/478
hsa01240	Biosynthesis of cofactors	149	-0.376217	-1.24213	0.0939597	0.329364	0.26481	3819	tags=28%, list=21%, signal=22%	387787/349565/211/55163/587/2235/1352/64802/29925/9104/6697/23057/6999/3242/54577/1738/51109/3145/79799/4144/2729/122481/54576/23475/212/217/219/4143/29968/554235/169355/53630/8630/54659/7364/248/1728/145226/54578/250/574537
hsa01230	Biosynthesis of amino acids	73	-0.37736	-1.12831	0.237925	0.566113	0.455157	6031	tags=53%, list=33%, signal=36%	5313/435/4548/440/1431/3418/441531/5832/3420/2875/2026/5230/26227/1373/3419/2752/5232/587/162417/2806/50/5831/221823/383/8277/113675/5213/4144/384/5723/5631/387712/2805/84706/5053/4143/29968/1491/2027
hsa05030	Cocaine addiction	49	-0.380765	-1.07188	0.349462	0.685682	0.551291	1914	tags=27%, list=10%, signal=24%	3725/2778/90993/111/2904/2913/2770/5567/2354/4129/6531/1812/2905
hsa04713	Circadian entrainment	95	-0.381568	-1.1815	0.177193	0.474485	0.381488	2720	tags=28%, list=15%, signal=24%	2791/2977/8912/5332/115/2778/163688/2786/2353/117/108/111/2893/8913/5578/4842/2904/107/5592/2770/5567/3760/4543/3708/6262/2905/2792
hsa00910	Nitrogen metabolism	17	-0.383595	-0.86012	0.669759	0.94197	0.757348	4075	tags=47%, list=22%, signal=37%	1373/2752/760/759/23632/771/763/762
hsa00860	Porphyrin and chlorophyll metabolism	41	-0.384168	-1.03741	0.39779	0.728537	0.585746	3348	tags=27%, list=18%, signal=22%	2235/1352/54577/3145/79799/54576/212/54659/7364/54578/574537
hsa04925	Aldosterone synthesis and secretion	98	-0.391985	-1.22538	0.132075	0.400164	0.321733	2645	tags=28%, list=14%, signal=24%	482/5138/8912/5332/115/2778/4881/163688/57118/949/108/90993/5581/111/3164/8913/5578/3777/107/492/3283/5567/3708/51305/185/491/478
hsa04913	Ovarian steroidogenesis	51	-0.393784	-1.11825	0.298214	0.639979	0.514545	2402	tags=27%, list=13%, signal=24%	115/2778/3294/949/108/111/255189/107/3283/5567/1586/3973/8644/2488
hsa04540	Gap junction	86	-0.397002	-1.21438	0.154514	0.438013	0.352164	2643	tags=29%, list=14%, signal=25%	2977/81027/5332/115/2778/7278/153/2911/108/57369/51807/113457/347688/111/80310/347733/5578/107/5592/2770/5567/3708/1950/3358/1812
hsa04920	Adipocytokine signaling pathway	69	-0.397938	-1.1735	0.183784	0.479308	0.385366	3417	tags=26%, list=18%, signal=21%	5599/3952/5563/1374/2180/5588/23205/79602/5602/208/32/3667/6517/948/10891/23305/8471/4852
hsa04022	cGMP-PKG signaling pathway	164	-0.399521	-1.33196	0.0302013	0.158801	0.127676	3607	tags=30%, list=20%, signal=25%	292/291/340156/85366/776/6722/4775/4208/151/489/7419/3764/146/482/2977/3827/5138/5332/115/4881/163688/148/91807/153/4985/108/624/90993/208/5581/111/10105/1910/7225/4625/3667/107/492/5592/2770/4879/157855/2626/3708/185/491/4880/8471/10242/478
hsa04724	Glutamatergic synapse	111	-0.400602	-1.27715	0.0841751	0.303907	0.244342	3377	tags=30%, list=18%, signal=24%	776/5579/116443/9456/5337/81539/2791/5332/115/2778/2786/2911/108/111/10991/2893/255189/5578/6505/2904/2913/107/9229/2898/2770/5567/3760/22941/6506/3708/2900/2905/2792
hsa00511	Other glycan degradation	17	-0.404158	-0.906227	0.601113	0.911455	0.732814	446	tags=12%, list=2%, signal=11%	57704/129807
hsa00380	Tryptophan metabolism	40	-0.409081	-1.10455	0.295956	0.639979	0.514545	3794	tags=45%, list=21%, signal=36%	1544/4128/1962/6999/501/1738/223/1543/55526/38/26/217/15/219/169355/121278/4129/316
hsa00120	Primary bile acid biosynthesis	17	-0.409312	-0.917782	0.589981	0.899433	0.723148	3342	tags=41%, list=18%, signal=34%	8309/3295/1582/23600/6718/9420/10858
hsa01200	Carbon metabolism	116	-0.409535	-1.31844	0.0616667	0.243019	0.195388	4914	tags=53%, list=27%, signal=39%	5313/414328/5161/1431/1737/128/6391/6389/3418/441531/3030/3420/51179/2875/5095/2026/1892/5230/26227/283871/6392/4191/8802/8803/35/1373/2539/3419/5232/5226/5160/2271/1962/84532/2806/9104/50/5096/221823/1738/3098/8277/113675/4967/5213/38/5723/5631/4329/387712/2805/84706/2653/29968/2027/4199/8789/80201/55753/2645/2731
hsa04727	GABAergic synapse	89	-0.415253	-1.27731	0.0994764	0.334562	0.268989	2919	tags=33%, list=16%, signal=28%	81539/2572/2563/18/2791/2569/115/2570/2786/108/2558/5334/111/10991/2571/5578/2560/107/6538/2565/2770/5567/774/2566/55879/2562/200959/9001/2792
hsa02010	ABC transporters	45	-0.415307	-1.14697	0.258652	0.593807	0.477423	2496	tags=40%, list=14%, signal=35%	1244/368/11194/4363/23461/10058/5243/64240/10060/10351/154664/94160/9429/64241/85320/10257/1672/6833
hsa04260	Cardiac muscle contraction	83	-0.421267	-1.2817	0.104056	0.34265	0.275492	4656	tags=42%, list=25%, signal=32%	29796/7385/440567/7386/6548/10369/1337/476/1537/341947/488/1346/3270/59283/4635/1351/776/10368/1349/781/489/444/84701/482/4633/170712/783/27091/4625/55799/4634/9254/6262/785/478
hsa00670	One carbon pool by folate	19	-0.42895	-0.986542	0.466302	0.795888	0.639897	2683	tags=16%, list=15%, signal=14%	160428/10841/10840
hsa04935	Growth hormone synthesis, secretion and action	119	-0.43312	-1.39902	0.0298013	0.158801	0.127676	2438	tags=24%, list=13%, signal=21%	5332/115/2778/2692/2353/8835/108/6752/5602/8503/90993/208/111/2689/5608/5578/3486/3667/107/2690/1442/2770/5567/6750/3708/1443/8471/6755
hsa04971	Gastric acid secretion	76	-0.443521	-1.33128	0.0799289	0.2961	0.238066	2645	tags=32%, list=14%, signal=27%	482/5332/115/2778/163688/91807/3784/108/6752/1131/111/3274/5578/3766/107/2770/5567/3776/6750/115111/3708/495/3758/478
hsa00770	Pantothenate and CoA biosynthesis	21	-0.444495	-1.05156	0.382353	0.716362	0.575958	4066	tags=43%, list=22%, signal=33%	53354/339896/587/5167/51733/217/219/1807/5169
hsa04966	Collecting duct acid secretion	27	-0.445372	-1.11241	0.306667	0.639979	0.514545	3402	tags=26%, list=18%, signal=21%	127124/760/534/155066/1188/6521/495
hsa05032	Morphine addiction	89	-0.449956	-1.38406	0.0453752	0.198076	0.159254	2874	tags=37%, list=16%, signal=31%	2563/2791/2569/5138/115/2778/2570/2786/5142/108/2558/5153/111/27115/5144/10846/5578/8622/2560/107/50940/2565/2770/5567/3760/774/2566/4988/55879/2562/200959/1812/2792
hsa00450	Selenocompound metabolism	14	-0.455414	-0.982019	0.476364	0.804325	0.646681	6309	tags=71%, list=34%, signal=47%	51091/10587/4548/114112/22928/22929/92935/7296/9060/1491
hsa00310	Lysine degradation	58	-0.459563	-1.33634	0.0673759	0.261185	0.209994	6454	tags=53%, list=35%, signal=35%	23127/55217/29072/79813/51166/23067/79823/79723/64324/5351/8085/3030/2639/83852/1892/1962/6419/10157/501/1738/123688/223/55526/38/93166/11105/63976/217/219/56979/150572
hsa04923	Regulation of lipolysis in adipocytes	54	-0.461588	-1.3205	0.0784314	0.293892	0.236291	2402	tags=33%, list=13%, signal=29%	115/2778/4881/153/108/8503/208/5346/111/3667/107/5592/2770/5567/364/2167/8471/4852
hsa00534	Glycosaminoglycan biosynthesis - heparan sulfate / heparin	24	-0.463112	-1.12124	0.3	0.639979	0.514545	397	tags=33%, list=2%, signal=33%	90161/2137/2135/9953/2131/9348/266722/64579
hsa00620	Pyruvate metabolism	39	-0.464236	-1.25362	0.157509	0.440932	0.354511	3471	tags=46%, list=19%, signal=38%	31/5105/4191/5160/2271/84532/3945/501/1738/223/3948/38/217/219/32/160287/4199/197257
hsa03060	Protein export	22	-0.464564	-1.11227	0.301294	0.639979	0.514545	8668	tags=73%, list=47%, signal=39%	6729/6731/55176/196294/6726/11231/23480/29927/10952/6728/9789/7095/60559/90701/58477/3309
hsa04973	Carbohydrate digestion and absorption	46	-0.466283	-1.29558	0.110108	0.353928	0.28456	2855	tags=30%, list=15%, signal=26%	776/5579/3098/482/5332/8503/208/278/80201/6523/346562/80834/6476/478
hsa00630	Glyoxylate and dicarboxylate metabolism	29	-0.467725	-1.17959	0.2397	0.566113	0.455157	4914	tags=45%, list=27%, signal=33%	51179/5095/283871/4191/2752/84532/50/5096/1738/38/2653/112817/2731
hsa00563	Glycosylphosphatidylinositol (GPI)-anchor biosynthesis	25	-0.469786	-1.15555	0.257576	0.593807	0.477423	8492	tags=76%, list=46%, signal=41%	128869/2822/51227/54965/9488/5277/8733/51604/54872/94005/55650/9091/10026/284098/84720/80055/5283/80235/23556
hsa00061	Fatty acid biosynthesis	17	-0.475681	-1.0666	0.376623	0.716069	0.575723	4858	tags=59%, list=26%, signal=43%	81616/31/2181/84869/197322/2194/2180/23205/32/23305
hsa03320	PPAR signaling pathway	74	-0.47585	-1.42689	0.0409253	0.196201	0.157746	3650	tags=36%, list=20%, signal=29%	2169/3157/1962/8309/729359/34/1582/1374/2180/23205/336/9415/4023/5346/2172/5468/345/4199/948/364/10999/23305/2167/116519/335/2712/3158
hsa00561	Glycerolipid metabolism	52	-0.476999	-1.3592	0.0566372	0.230796	0.185561	2129	tags=29%, list=12%, signal=26%	116255/4023/1608/56895/217/219/9388/84649/3990/57678/8513/9162/2712/80168/57016
hsa04950	Maturity onset diabetes of the young	26	-0.477684	-1.18095	0.241379	0.566113	0.455157	1647	tags=38%, list=9%, signal=35%	168620/4821/5078/3172/3170/222546/3175/2645/389692/3651
hsa04979	Cholesterol metabolism	49	-0.481791	-1.35627	0.0681004	0.261185	0.209994	2091	tags=29%, list=11%, signal=25%	64240/949/336/4023/4018/64241/9388/345/1071/4036/948/3990/335/337
hsa04976	Bile secretion	90	-0.48802	-1.50351	0.0192644	0.120773	0.0971022	2979	tags=37%, list=16%, signal=31%	54577/6550/79799/482/5243/115/2778/57835/2052/3156/10864/64240/949/108/54576/6343/111/6344/9429/64241/107/54659/7364/5567/361/10257/9971/8671/54578/6523/8431/478/574537
hsa00410	beta-Alanine metabolism	30	-0.501237	-1.2752	0.145251	0.426594	0.342983	4641	tags=63%, list=25%, signal=47%	1892/23417/35/339896/1962/501/8639/2572/223/18/54498/314/4329/51733/217/219/2571/218/1807
hsa00020	Citrate cycle (TCA cycle)	30	-0.50583	-1.28688	0.132216	0.400164	0.321733	5938	tags=63%, list=32%, signal=43%	5161/1431/1737/6391/6389/3418/3420/5105/6392/4191/8802/8803/3419/5160/2271/50/1738/4967/55753
hsa00040	Pentose and glucuronate interconversions	33	-0.512304	-1.33526	0.105839	0.345037	0.277411	1037	tags=21%, list=6%, signal=20%	51181/54576/54659/7364/54578/574537/57016
hsa00140	Steroid hormone biosynthesis	60	-0.514523	-1.49436	0.0266904	0.151365	0.121698	1143	tags=22%, list=6%, signal=20%	9420/8630/54659/3283/7364/3291/3293/1586/8644/54578/1645/574537/1646
hsa05033	Nicotine addiction	40	-0.520575	-1.40559	0.0551471	0.227569	0.182966	2874	tags=40%, list=16%, signal=34%	2563/2569/2570/2558/2893/2904/2560/1137/2565/774/2566/1139/55879/2562/200959/2905
hsa00051	Fructose and mannose metabolism	30	-0.523389	-1.33155	0.0949721	0.329371	0.264816	1006	tags=30%, list=5%, signal=28%	6652/29925/3098/5213/5208/5207/8789/80201/57016
hsa04927	Cortisol synthesis and secretion	65	-0.528705	-1.54808	0.0252252	0.149267	0.120012	2572	tags=35%, list=14%, signal=31%	8912/5332/115/2778/949/108/90993/111/2516/3164/8913/8622/3777/107/3283/5567/3776/3739/56246/1586/3708/185/190
hsa00500	Starch and sucrose metabolism	34	-0.531942	-1.39142	0.0741411	0.281046	0.225962	3034	tags=35%, list=16%, signal=30%	5167/3098/178/8908/278/2998/11181/80201/2645/5837/5169/6476
hsa00730	Thiamine metabolism	14	-0.53306	-1.14945	0.301818	0.639979	0.514545	858	tags=64%, list=5%, signal=61%	84284/26289/204/79178/158067/9054/122481/248/250
hsa00280	Valine, leucine and isoleucine degradation	47	-0.538686	-1.49857	0.02693	0.151365	0.121698	4119	tags=62%, list=22%, signal=48%	35/593/197322/3028/11112/594/587/3157/5019/1962/65985/1629/3712/5096/34/501/1738/27034/223/18/38/64087/36/4329/217/64064/219/316/3158
hsa00053	Ascorbate and aldarate metabolism	30	-0.538735	-1.3706	0.0819367	0.300128	0.241304	3289	tags=43%, list=18%, signal=36%	9104/501/54577/79799/223/54576/217/219/54659/7364/55586/54578/574537
hsa04740	Olfactory transduction	422	-0.542238	-1.97245	0.00165563	0.0218294	0.0175509	1853	tags=38%, list=10%, signal=35%	346528/390275/402317/26538/79544/2774/126370/5153/81099/390064/390083/401992/283297/341152/79317/26246/219464/26219/341568/79549/127062/144124/138804/127064/442186/219960/119694/1260/79473/79541/341416/283111/135948/119679/284521/134083/390036/390429/338662/26188/343170/283093/391109/5592/343172/390081/5567/343171/390148/26696/81127/138883/8392/283365/4992/441933/81309/81472/26737/8387/219438/390…
hsa00330	Arginine and proline metabolism	49	-0.542495	-1.52716	0.0232975	0.143302	0.115215	3525	tags=45%, list=19%, signal=36%	4128/2806/5831/501/383/548596/223/384/54498/26/79814/2628/2805/1159/217/219/8659/4842/1152/112817/4129/1160
hsa00900	Terpenoid backbone biosynthesis	22	-0.545645	-1.3064	0.147874	0.426611	0.342997	5840	tags=45%, list=32%, signal=31%	51449/10269/4597/3422/116150/3157/38/3156/91734/3158
hsa04964	Proximal tubule bicarbonate reclamation	23	-0.555778	-1.34556	0.119705	0.378873	0.304616	4484	tags=43%, list=24%, signal=33%	5105/1468/476/760/6550/482/10991/762/8671/478
hsa04918	Thyroid hormone synthesis	75	-0.555838	-1.66852	0.00711744	0.0553105	0.0444698	2758	tags=43%, list=15%, signal=36%	821/482/7849/2878/5332/115/2778/53905/9601/108/90993/7184/432/3309/111/2880/257202/6906/5578/50506/107/7038/405753/5567/389434/4036/3708/5172/7173/6528/478/2877
hsa00130	Ubiquinone and other terpenoid-quinone biosynthesis	11	-0.560943	-1.13625	0.306859	0.639979	0.514545	6117	tags=55%, list=33%, signal=37%	51004/51805/84274/10229/3242/1728
hsa04930	Type II diabetes mellitus	46	-0.570013	-1.5838	0.0144404	0.099053	0.079639	2345	tags=33%, list=13%, signal=29%	3767/8835/5602/8503/5581/8913/3667/6517/80201/774/2645/6833/8471/389692/3651
hsa00260	Glycine, serine and threonine metabolism	39	-0.583941	-1.57687	0.025641	0.149267	0.120012	3782	tags=46%, list=20%, signal=37%	211/4128/501/8639/1738/23464/113675/5723/314/29958/2628/27232/212/2653/29968/1491/4129/2731
hsa00052	Galactose metabolism	30	-0.586643	-1.49248	0.0446927	0.198076	0.159254	962	tags=13%, list=5%, signal=13%	80201/2645/6476/57016
hsa04978	Mineral absorption	59	-0.600025	-1.74565	0.00357143	0.0298535	0.0240023	1842	tags=37%, list=10%, signal=34%	6550/142680/482/261729/540/4501/140803/4490/492/115019/4493/55503/795/1811/4499/645745/491/4494/4495/4496/6523/478
hsa03450	Non-homologous end-joining	12	-0.606837	-1.26098	0.179024	0.474485	0.381488	324	tags=17%, list=2%, signal=16%	3981/1791
hsa00640	Propanoate metabolism	33	-0.621868	-1.62083	0.0145985	0.099053	0.079639	5203	tags=70%, list=28%, signal=50%	3030/5095/79611/1892/31/23417/8802/8803/35/593/594/1962/84532/3945/1629/5096/1738/18/3948/38/4329/32/160287
hsa00650	Butanoate metabolism	28	-0.65137	-1.62442	0.0190476	0.120773	0.0971022	3514	tags=71%, list=19%, signal=58%	123876/3030/348158/1892/35/3157/5019/79944/1962/65985/341392/2572/18/38/622/54988/64064/2571/142827/3158
hsa00790	Folate biosynthesis	24	-0.664218	-1.60814	0.0283019	0.153774	0.123635	1662	tags=38%, list=9%, signal=34%	873/6697/5860/5053/248/121278/8644/250/57016
hsa00072	Synthesis and degradation of ketone bodies	10	-0.747417	-1.49008	0.0461812	0.198093	0.159267	3514	tags=60%, list=19%, signal=49%	3157/5019/38/622/64064/3158
GSEA enrichment analysis of ICIcluster 2 and ICIcluster 3
ID	Description	setSize	enrichmentScore	NES	pvalue	p.adjust	qvalues	rank	leading_edge	core_enrichment
hsa05340	Primary immunodeficiency	36	0.80869	1.81958	0.00124844	0.0134649	0.0113041	1623	tags=61%, list=9%, signal=56%	57379/930/115650/973/3543/326/3575/23495/959/5788/29851/916/3561/7535/3932/915/695/925/5897/920/4261/926
hsa04672	Intestinal immune network for IgA production	45	0.78668	1.81824	0.00123457	0.0134649	0.0113041	3138	tags=73%, list=17%, signal=61%	57379/115650/608/23495/959/940/29851/3569/3676/3586/941/3558/3117/10673/3112/942/7852/3111/3118/6387/8174/3113/3122/3115/3123/5284/23308/3127/3108/6370/3695/9020/3119
hsa05310	Asthma	28	0.785485	1.70123	0.00128041	0.0134649	0.0113041	3397	tags=82%, list=18%, signal=67%	959/3578/6356/3586/2206/3117/3112/2207/3111/3118/2205/3113/7124/3122/3115/3123/3562/3127/3108/6037/5553/3119/3596
hsa05332	Graft-versus-host disease	38	0.7811	1.77311	0.00124533	0.0134649	0.0113041	3138	tags=84%, list=17%, signal=70%	940/3812/3569/3002/115653/3552/3811/3458/941/3824/3558/3117/3112/942/5551/3111/3118/356/3135/3802/3113/3553/7124/3122/3804/3115/3123/3127/3108/3821/3134/3119
hsa04061	Viral protein interaction with cytokine and cytokine receptor	98	0.76303	1.92224	0.00110742	0.0134649	0.0113041	2576	tags=65%, list=14%, signal=56%	6363/643/10563/6372/6366/2829/1236/6373/4283/3627/1233/6369/1235/2919/3569/3561/1237/6356/4049/3586/5197/3559/3558/2833/6846/3576/3579/1234/3560/5473/6374/7852/11009/6352/3587/6368/6361/2920/3570/6367/6375/388372/6351/729230/6362/2921/6387/1230/8807/29949/6347/6364/1436/7124/8740/51554/9547/8809/6346/414062/6348/8743/10344/6355
hsa05330	Allograft rejection	35	0.762988	1.71352	0.00124378	0.0134649	0.0113041	4045	tags=89%, list=22%, signal=69%	3593/959/940/3002/3586/3458/941/3558/3117/3112/942/5551/3111/3118/356/3135/3113/7124/3122/3115/3123/3592/3127/3108/3134/3119/3107/3133/958/355/3106
hsa05321	Inflammatory bowel disease	63	0.75941	1.83604	0.0011655	0.0134649	0.0113041	2726	tags=60%, list=15%, signal=52%	59067/3593/112744/3569/50615/3561/3552/3586/3458/3558/3605/30009/3594/3117/3112/64127/3111/3118/50943/8807/7043/3113/3553/7124/3122/50616/3115/4772/8809/6775/3123/7099/149233/7097/6772/3592/3127/3108
hsa05144	Malaria	50	0.759096	1.76995	0.00122699	0.0134649	0.0113041	2385	tags=60%, list=13%, signal=52%	1378/959/1440/3569/3683/100528032/3586/3458/7412/7058/7057/3576/3820/1379/22914/6401/3689/3082/2532/3043/7043/3553/6347/3039/7124/2995/6403/7099/7097/3592
hsa05322	Systemic lupus erythematosus	51	0.755286	1.76807	0.001221	0.0134649	0.0113041	2152	tags=61%, list=12%, signal=54%	959/940/730/716/729/3586/3458/1511/941/715/3117/3112/717/942/3111/714/3118/713/2214/2215/712/2212/3113/718/7124/3122/2209/3115/2904/3123/1991
hsa04640	Hematopoietic cell lineage	95	0.750724	1.8894	0.00110497	0.0134649	0.0113041	3309	tags=67%, list=18%, signal=56%	2208/1380/930/931/1378/2322/3575/952/1440/917/921/916/3569/2811/910/3676/951/915/924/3552/914/3559/925/3117/913/3112/911/1379/3568/3570/3111/3118/920/3589/926/7850/945/3113/3553/3684/4311/909/1436/7124/3122/2209/1441/3115/3123/3562/2814/3574/1791/3673/3127/1437/3108/3119/290/1435/7066/933/3678/912
hsa05140	Leishmaniasis	73	0.742779	1.82681	0.00114811	0.0134649	0.0113041	2726	tags=55%, list=15%, signal=47%	1378/3593/3676/3552/3586/3458/653361/1536/3117/3112/5579/1379/3111/4688/3118/3689/5743/2214/2215/4689/2212/7043/3113/718/3553/3684/7124/3122/2209/3115/3123/7099/7097/6772/3592/3717/4843/3127/4792/3108
hsa04612	Antigen processing and presentation	68	0.712807	1.73791	0.00116144	0.0134649	0.0113041	3173	tags=53%, list=17%, signal=44%	3812/115653/3811/3458/3824/925/3823/8302/3117/3112/3111/3118/920/3805/3135/3802/4261/926/3113/7124/3122/3804/3115/3822/3123/6890/972/6891/3310/3127/1520/3108/3821/3134/3119/10437
hsa05133	Pertussis	76	0.704978	1.73751	0.00113895	0.0134649	0.0113041	2760	tags=45%, list=15%, signal=38%	6372/729238/653509/3593/51806/3394/3569/716/3552/3586/715/3576/717/6374/114548/714/713/3689/810/712/834/718/3553/3684/7124/23643/7099/353376/3659/3592/4843/722/710/725
hsa05416	Viral myocarditis	57	0.693998	1.65981	0.00238379	0.0215865	0.0181224	4068	tags=54%, list=22%, signal=43%	4625/959/940/3683/6445/941/3117/3112/942/5551/3111/3118/3689/3135/5880/3113/3908/3122/3115/3123/3127/3108/3134/3119/3383/3107/3133/27/958/3106/6444
hsa04659	Th17 cell differentiation	105	0.690175	1.746	0.0010846	0.0134649	0.0113041	3473	tags=48%, list=19%, signal=39%	59067/112744/917/916/3569/50615/3561/919/7535/3932/915/3458/3559/3558/3605/30009/3594/3117/3112/3560/3662/3570/3111/3118/920/50943/3113/3553/3122/50616/3115/4772/3123/149233/6772/3717/3718/3127/4773/4792/3108/51561/3119/5535/861/9466/4775/7048/3554/27040
hsa04940	Type I diabetes mellitus	41	0.689876	1.57941	0.00866337	0.0656804	0.0551401	3576	tags=76%, list=19%, signal=61%	3593/940/5798/3002/4049/3552/3458/941/3558/3117/3112/942/5551/3111/3118/356/3135/3113/3553/7124/3122/3115/3123/3592/3127/3108/3134/3119/3107/2572/3133
hsa04260	Cardiac muscle contraction	83	0.684996	1.70031	0.00111857	0.0134649	0.0113041	1712	tags=24%, list=9%, signal=22%	4633/4625/10345/1339/779/59284/23439/4634/59285/70/10368/487/786/6547/480/478/6546/4635/27091/489
hsa04657	IL-17 signaling pathway	94	0.68493	1.71965	0.00110742	0.0134649	0.0113041	2683	tags=36%, list=15%, signal=31%	6372/112744/1440/3627/100289462/2919/3569/6356/3458/4322/3605/7128/3576/6374/6361/2920/6280/6279/6278/5743/2921/8061/3553/6347/6364/2354/4318/7124/7188/4586/1437/727897/4312/4792
hsa05410	Hypertrophic cardiomyopathy	90	0.677475	1.69679	0.00110988	0.0134649	0.0113041	1826	tags=29%, list=10%, signal=26%	4633/4625/779/59284/4634/1674/59285/3569/53632/70/6445/3676/10368/487/786/3479/6547/7273/6546/22801/27091/7043/3908/489/7124/4607
hsa04064	NF-kappa B signaling pathway	102	0.667827	1.6836	0.00109769	0.0134649	0.0113041	4095	tags=51%, list=22%, signal=40%	6363/115650/6366/959/2919/8600/4050/7535/3932/4049/695/330/7412/7128/10673/3576/5579/3929/2920/84433/597/388372/6351/5743/2921/6387/3553/7124/8740/23643/5328/5336/7099/353376/7185/7188/4792/6357/10913/4616/9020/3383/3554/4615/27040/929/23586/8792/1540/958/3654/472
hsa04662	B cell receptor signaling pathway	79	0.664189	1.63861	0.00113507	0.0134649	0.0113041	3292	tags=42%, list=18%, signal=34%	1380/930/973/23547/974/27071/695/10288/10859/5579/353514/7409/84433/2213/118788/5880/971/10990/79168/11006/5293/11024/4772/5336/3635/11025/11027/4773/4792/8519/5535/4775/933
hsa04658	Th1 and Th2 cell differentiation	90	0.661744	1.65739	0.00110988	0.0134649	0.0113041	3473	tags=43%, list=19%, signal=35%	3593/864/917/916/3561/919/7535/3932/915/3458/3559/3558/30009/3594/3117/3112/3560/3111/3118/920/3113/3122/3115/4772/6775/3123/6772/3592/3717/3718/3127/4773/4792/3108/3119/5535/4775/3596/27040
hsa04380	Osteoclast differentiation	124	0.655868	1.67796	0.00107759	0.0134649	0.0113041	3438	tags=45%, list=19%, signal=37%	23547/55423/8600/814/10326/3932/695/3552/3458/653361/10288/10859/353514/4688/2213/2214/10990/2215/79168/8061/3937/6688/4689/2212/11006/3553/5293/1513/2354/11024/1436/7124/9021/2209/4772/5336/7305/126014/11025/140885/2355/6772/2274/54/11027/4773/4792/3455/54209/9020/8651/1435/5535/7048/3554/5608
hsa04514	Cell adhesion molecules	140	0.65492	1.69153	0.00106838	0.0134649	0.0113041	4483	tags=58%, list=24%, signal=44%	644672/959/5788/3385/1462/940/201633/29851/5133/3683/3676/22854/1493/941/914/923/7412/10666/3897/6693/925/3117/6402/3112/942/3111/3118/6401/920/1272/57502/3689/3135/80380/6404/4685/8174/6614/926/3113/3684/3122/3115/6403/23562/3123/8516/23308/3127/3108/3695/9071/3134/3119/933/9019/3383/9378/29126/3107/26047/3133/1013/3688/9379/79679/5175/6900/9074/3655/958/3106/9369/54413/3685/149461/64101/23114/5…
hsa04062	Chemokine signaling pathway	188	0.653512	1.71936	0.00104167	0.0134649	0.0113041	2872	tags=41%, list=16%, signal=35%	6363/643/10563/6372/6366/2829/1236/6373/3702/4283/3627/1233/6369/1235/2919/1794/1237/6356/5294/5197/10235/653361/23533/7454/2833/6846/3576/3579/1234/5579/5473/6374/7852/10663/6352/3055/7409/6368/6361/2920/6367/6375/388372/6351/729230/6362/5880/2921/6387/5330/1230/113/6347/5293/6364/54331/9547/2268/6346/5336/146850/59345/6772/414062/2786/6348/10344/2793/3717/6355/3718/94235/51764/4792/6370/57580/4…
hsa05414	Dilated cardiomyopathy	95	0.64342	1.61934	0.00110497	0.0134649	0.0113041	1826	tags=26%, list=10%, signal=24%	4633/4625/779/59284/4634/1674/59285/70/6445/3676/10368/487/786/3479/6547/7273/6546/22801/27091/113/7043/3908/489/7124/4607
hsa04060	Cytokine-cytokine receptor interaction	293	0.642322	1.72876	0.00101626	0.0134649	0.0113041	3419	tags=55%, list=19%, signal=46%	3440/6363/643/10563/6372/115650/6366/2829/1236/608/3575/59067/27302/6373/23495/3593/4283/112744/3604/959/55801/1440/3627/1233/6369/1235/2919/3569/8600/944/4050/3578/50615/3561/1237/1439/6356/4049/3952/3603/3552/3586/5197/3458/3559/3443/3558/3605/3594/2833/10673/6846/3576/3624/3579/1234/3560/5473/6374/7852/11009/10663/6352/3587/6368/6361/2920/3568/7292/3570/282618/356/353500/6367/920/6375/388372/6…
hsa05134	Legionellosis	57	0.641795	1.53496	0.0107271	0.0744047	0.0624644	2683	tags=37%, list=15%, signal=32%	1378/3593/2919/3569/3576/1379/2920/3689/2921/834/718/3553/3684/7124/58484/7099/7097/3592/4671/3310/4792
hsa04660	T cell receptor signaling pathway	100	0.641689	1.61712	0.00110132	0.0134649	0.0113041	3277	tags=35%, list=18%, signal=29%	3702/959/5788/940/917/29851/916/5133/919/7535/3932/915/1493/3586/3458/9402/3558/925/7409/84433/920/3937/926/5293/7124/10125/4772/1437/4773/1326/4792/9020/5063/5535/4775
hsa05412	Arrhythmogenic right ventricular cardiomyopathy	77	0.640849	1.58022	0.00113636	0.0134649	0.0113041	4346	tags=49%, list=24%, signal=38%	88/779/59284/1674/59285/6445/3676/10368/487/786/6547/89/6546/22801/27091/3908/489/29119/8516/3673/3694/3695/3691/3678/51176/1496/93589/3688/6262/3655/1824/775/6444/3690/3685/3672/60/5318
hsa04625	C-type lectin receptor signaling pathway	104	0.638517	1.61062	0.0010917	0.0134649	0.0113041	3277	tags=36%, list=18%, signal=29%	10332/3593/51806/3569/93978/30835/3586/338339/3558/4046/114548/2207/26253/6361/6367/64581/5743/810/834/51266/3553/5293/1960/7124/4772/5336/3659/6772/64170/3592/4773/4792/1959/9020/51561/5535/4775
hsa05143	African trypanosomiasis	36	0.630005	1.41753	0.0449438	0.221995	0.18637	4139	tags=69%, list=22%, signal=54%	3593/3620/3569/3586/3458/7412/5579/6401/356/5330/3043/3553/3039/7124/169355/3592/5578/8542/3040/3383/4615/3910/355/3606/23236
hsa05323	Rheumatoid arthritis	89	0.627104	1.56976	0.00111111	0.0134649	0.0113041	3182	tags=57%, list=17%, signal=48%	6372/940/2919/3569/8600/4050/3683/1493/3552/3458/941/3605/3117/10673/3576/3112/6374/942/6352/2920/3111/3118/3689/3589/2921/6387/7043/3113/3553/6347/1513/6364/7124/3122/3115/245972/3123/7099/7097/127124/414062/6348/54/3127/1437/4312/3108/284/51561/3119/1435
hsa04668	TNF signaling pathway	111	0.62012	1.57714	0.00108814	0.0134649	0.0113041	5038	tags=51%, list=27%, signal=38%	6372/3627/2919/3569/4049/330/7412/7128/6374/6352/64127/2920/6401/5743/2921/90993/3553/6347/5293/6364/4318/7124/9021/8809/3659/4323/7185/7188/3976/1437/1326/4792/197259/1906/9020/7133/1435/3383/5608/843/9586/602/9252/4314/355/182/840/2353/8837/5295/841/6376/3456/5290/836/4790/7187
hsa05146	Amoebiasis	100	0.618377	1.55837	0.00110132	0.0134649	0.0113041	4181	tags=54%, list=23%, signal=42%	6318/6317/3909/3593/2919/3569/5275/910/1281/3586/3458/1511/1278/1277/5273/913/3576/5579/911/2920/3689/2921/5330/7043/7850/3553/3684/5293/909/3908/7124/2769/5272/338382/7099/7097/3592/5578/4843/1437/2335/3912/912/3554/3910/1282/1284/929/3918/5567/2774/732/23236/1288
hsa04512	ECM-receptor interaction	88	0.614189	1.53502	0.00222222	0.0206984	0.0173768	4245	tags=50%, list=23%, signal=39%	3909/3381/2811/3676/1293/1278/5649/1277/7058/7057/9899/22801/3908/1291/6696/1292/3371/8516/3161/2814/1280/7148/158326/3673/3694/3695/2335/3912/3691/7143/3678/3910/1282/1284/3339/3688/3918/3655/7448/3690/3685/1288/63923/3672
hsa04145	Phagosome	148	0.607215	1.57812	0.00211416	0.0202711	0.017018	2726	tags=36%, list=15%, signal=31%	10332/729238/653509/30835/653361/2204/7058/10333/7057/1536/715/3117/4360/3112/11151/3111/4688/3118/81035/2213/64581/347733/3689/4973/3135/2214/2215/4689/2212/4153/8685/4481/3113/718/3684/3122/2209/3115/245972/81027/10381/338382/3123/7099/6890/7097/6891/127124/79861/7280/3673/3127/1520/3108
hsa05235	PD-L1 expression and PD-1 checkpoint pathway in cancer	89	0.600123	1.50223	0.00333333	0.0285965	0.0240074	5273	tags=53%, list=29%, signal=38%	238/940/917/916/5133/919/7535/3932/915/3458/10538/920/116071/5293/10125/4772/7099/353376/7097/6772/55509/3717/4773/4792/5535/4775/29126/5608/4615/27040/5777/4893/1950/3091/4215/2353/5295/4794/3845/3459/5290/283106/54106/4790/3716/6774/8503
hsa05145	Toxoplasmosis	110	0.598999	1.52056	0.00327154	0.0285965	0.0240074	4076	tags=44%, list=22%, signal=34%	3909/3593/959/5294/3586/3458/330/23533/3117/3112/1234/3587/3111/3118/4261/7043/3113/3908/7124/3122/23643/3115/146850/3123/7099/7097/6772/240/3592/3717/3310/4843/3127/4792/3949/3108/345611/3119/8651/3912/5608/4615/3910/3688/3918/3655/958/3654
hsa05150	Staphylococcus aureus infection	91	0.595164	1.49195	0.00554324	0.0440755	0.0370024	2455	tags=53%, list=13%, signal=46%	1667/25984/1669/2358/1671/3861/100289462/3872/3683/716/1828/3586/2204/2359/3868/715/3117/3112/717/2357/3111/714/3118/2213/713/3689/728/719/6404/2214/2215/712/2212/4153/5648/3113/718/3684/5724/3122/8689/2209/3115/6403/3123/390792/3075/3885
hsa05152	Tuberculosis	176	0.58526	1.53602	0.00208986	0.0202711	0.017018	2765	tags=35%, list=15%, signal=30%	10332/3440/1378/3593/51806/3569/30835/3552/3586/3458/3443/815/10333/4046/3117/4360/3112/11151/2207/26253/64127/3929/1379/3587/3111/3118/2213/64581/7096/3689/3451/2214/3687/4261/2215/810/2212/7043/3113/718/3553/3684/7124/3122/3447/2209/3115/245972/3123/7099/972/7097/6772/64170/3592/3717/4843/3127/1520/3108/7421
hsa04933	AGE-RAGE signaling pathway in diabetic complications	99	0.580595	1.46033	0.00997783	0.0739266	0.062063	5273	tags=47%, list=29%, signal=34%	3569/1281/3552/5054/7412/1278/1277/1536/3576/5579/6401/2152/5330/7043/3553/6347/5293/7124/4772/5336/5292/6772/3717/5578/4313/7056/1906/50507/2335/3383/7048/1282/1284/4893/177/23236/1288/5581/5295/3845/4846/5290/836/4790/7040/6774/8503
hsa05142	Chagas disease	101	0.579737	1.45986	0.0110011	0.0747158	0.0627256	2683	tags=33%, list=15%, signal=28%	3593/917/916/3569/919/915/3586/3458/5054/3558/10333/3576/6352/714/356/713/5330/712/7043/718/3553/6347/5293/7124/2769/7099/7097/414062/6348/3592/4843/624/4792
hsa05320	Autoimmune thyroid disease	50	0.574495	1.33952	0.0773006	0.36	0.302228	2125	tags=48%, list=12%, signal=43%	3440/959/940/3002/1493/3586/941/3443/3558/3117/3112/942/1081/5551/3111/3118/356/3135/3451/3113/3122/3447/3115/3123
hsa04650	Natural killer cell mediated cytotoxicity	123	0.572889	1.46545	0.00539957	0.0440065	0.0369444	2616	tags=40%, list=14%, signal=34%	3440/4068/259197/962/3812/3002/115653/3683/919/7535/3932/100528032/3811/3458/3824/3443/3823/5579/2207/5551/7409/22914/356/117157/3689/3135/3802/5880/3451/51744/2214/2215/3937/5293/9436/7124/3447/3804/9437/4772/3822/4277/5336/7305/8743/10870/5578/1437/4773
hsa05135	Yersinia infection	134	0.562567	1.45191	0.0107066	0.0744047	0.0624644	5000	tags=41%, list=27%, signal=30%	3569/3676/7535/3932/3586/3558/7454/925/3576/114548/7409/920/5880/4210/3937/2212/834/926/3553/6347/5293/7124/58484/7456/4772/7099/4773/4792/2335/9844/4775/3678/5608/4615/27040/3688/8935/10097/9138/10096/3654/3606/60/9475/2353/5295/9815/3456/10095/6197/10092/5290/6093/29108/4790
hsa05166	Human T-cell leukemia virus 1 infection	217	0.55521	1.47388	0.00206825	0.0202711	0.017018	5178	tags=42%, list=28%, signal=31%	115650/917/916/3569/3683/3561/3932/915/4049/3559/7015/3558/3117/3112/3560/3111/3118/920/3689/3135/8061/6688/113/90993/7043/7850/3113/5293/7124/3122/3115/4772/9700/4609/3123/2113/890/3718/3127/1437/4773/7538/4792/3108/1959/1030/991/10744/9133/3134/9020/3119/5535/4775/111/3383/1870/7048/8829/109/3601/3554/3107/2114/3133/9586/567/5567/958/8900/3106/4893/472/701/4215/2005/2353/4791/5295/3845/5971/672…
hsa02010	ABC transporters	45	0.553936	1.2803	0.128395	0.52089	0.437299	3754	tags=38%, list=20%, signal=30%	8647/225/23460/10350/6890/6891/5244/10060/94160/1080/5243/340273/10257/9619/1672/1244/85320
hsa05221	Acute myeloid leukemia	67	0.550892	1.34344	0.0717593	0.344022	0.288814	5787	tags=54%, list=31%, signal=37%	2322/11040/597/6688/3684/5293/1436/2209/5292/4609/3562/890/1437/7704/4353/861/51176/862/1053/929/1050/8900/4893/5295/3845/5290/4790/6654/6774/8503/83439/2885/5371/8517/5604/8864
hsa04670	Leukocyte transendothelial migration	112	0.549679	1.39645	0.0217628	0.124468	0.104494	2187	tags=21%, list=12%, signal=19%	4633/644672/399/3702/3683/3676/7412/653361/1536/5579/7852/7409/4688/3689/5880/6387/4689/3684/5293/4318/7294/5336/23562/29119
hsa05202	Transcriptional misregulation in cancer	173	0.545631	1.43141	0.00837696	0.0650212	0.0545867	4460	tags=45%, list=24%, signal=34%	1667/5079/1669/2322/8013/1671/3569/3002/7490/2892/330/64919/3576/3560/942/3479/30012/597/6495/6688/7850/3684/1436/4318/171558/2209/5328/3195/5966/4609/1991/85414/3562/890/7185/2138/3205/2313/51513/1437/3248/7704/51384/3695/4616/4353/6935/861/3206/4066/64332/7048/51804/4208/862/1053/55589/929/9915/1050/8842/5327/4314/958/8900/7113/472/578/604/2078/100532731/54738/2005/4086/4211/2120/3207
hsa04621	NOD-like receptor signaling pathway	177	0.544342	1.43051	0.00521376	0.0435817	0.0365878	2683	tags=31%, list=15%, signal=27%	1667/3440/9447/1669/1671/100289462/115362/2919/3569/171389/440068/330/838/3443/7128/1536/3576/114548/115361/6352/64127/2920/9051/59082/3451/4210/2921/5330/2633/118429/834/3553/6347/7124/51393/3447/58484/7226/199713/837/5027/4939/114769/7099/222545/6772/64170/3428/91662/7188/4940/4671/2634/84168/4792
hsa04620	Toll-like receptor signaling pathway	102	0.543232	1.36949	0.0406147	0.205031	0.172128	2683	tags=34%, list=15%, signal=29%	3440/6373/3593/4283/3627/3569/51311/941/3443/10333/3576/942/6352/3929/51284/388372/6351/7096/3451/3553/5293/1513/7124/23643/3447/6696/7099/353376/7097/6772/414062/6348/3592/1326/4792
hsa04924	Renin secretion	67	0.542288	1.32245	0.0868056	0.398572	0.33461	4139	tags=34%, list=22%, signal=27%	779/9635/51806/5140/5732/155/154/810/5330/116/5734/1909/3778/1906/5139/5535/111/3708/5567/2977/775/3759/23236
hsa04261	Adrenergic signaling in cardiomyocytes	149	0.537643	1.39882	0.0137421	0.0861522	0.0723267	2015	tags=21%, list=11%, signal=19%	4633/4625/779/59284/23439/4634/59285/51806/70/5294/10368/23533/815/487/786/186/3753/6547/480/478/6546/4635/154/27091/810/5330/113/90993/489/148/146850
hsa00533	Glycosaminoglycan biosynthesis - keratan sulfate	14	0.536347	1.06191	0.423752	0.979738	0.822512	4662	tags=36%, list=25%, signal=27%	10164/4166/6483/2683/2530
hsa04371	Apelin signaling pathway	134	0.530807	1.36994	0.0203426	0.118423	0.0994188	4139	tags=31%, list=22%, signal=24%	4633/4634/51806/53632/5140/814/5294/5054/23533/91807/6547/6546/4635/810/5330/113/54331/100271849/146850/6696/59345/2786/2793/7350/94235/4843/51764/4638/5346/85366/111/109/4208/3708/10365/6262/5327/10672/5567/182/4893/23236
hsa04630	JAK-STAT signaling pathway	162	0.528578	1.38138	0.0126183	0.0822713	0.0690686	3530	tags=41%, list=19%, signal=34%	3440/3575/59067/3593/1440/3569/3578/50615/3561/1439/3952/3586/3458/3559/3443/3558/5156/3594/3560/11009/3587/3568/3570/282618/116379/3451/3589/5617/282617/56832/316/29949/5293/282616/9021/50616/3447/1441/5292/6775/4609/5008/149233/3562/6772/3592/3574/9180/3717/3976/3718/1437/3598/1270/3455/3953/51561/8651/5159/7066/9466/2690/3596/3601/4170/3977/8835
hsa00604	Glycosphingolipid biosynthesis - ganglio series	15	0.525644	1.04839	0.443843	0.994409	0.834828	4492	tags=33%, list=24%, signal=25%	6489/29906/2583/6483/81849
hsa00603	Glycosphingolipid biosynthesis - globo and isoglobo series	15	0.524676	1.04645	0.445196	0.994409	0.834828	5852	tags=67%, list=32%, signal=46%	6489/2524/6483/10690/10317/53947/127550/2717/4668/26301
hsa00120	Primary bile acid biosynthesis	17	0.524112	1.05791	0.423181	0.979738	0.822512	3364	tags=35%, list=18%, signal=29%	6718/1109/9023/1593/9420/1582
hsa00770	Pantothenate and CoA biosynthesis	21	0.521867	1.08145	0.386152	0.966143	0.811098	1878	tags=24%, list=10%, signal=21%	8875/55350/586/8876/339896
hsa05162	Measles	138	0.520315	1.34313	0.0320513	0.174145	0.146199	2683	tags=25%, list=15%, signal=21%	10332/3440/3593/940/917/916/3569/6504/3561/30835/915/3552/3559/3443/3558/7128/3560/356/2213/51284/3451/3553/5293/3447/4600/4939/7099/7097/6772/3592/4940/3310/3718/4792
hsa04610	Complement and coagulation cascades	85	0.519475	1.29481	0.0989989	0.440541	0.369844	3013	tags=52%, list=16%, signal=44%	1380/1378/5104/730/716/729/5054/2151/715/717/1379/714/713/3689/728/719/3687/2152/712/4153/5648/2162/718/3684/5055/11326/5345/5328/10878/7035/2159/3053/5329/2153/3075/9002/624/722/7056/710/2149/725/629/3078
hsa04664	Fc epsilon RI signaling pathway	67	0.514365	1.25436	0.148148	0.556668	0.467335	3473	tags=30%, list=19%, signal=24%	695/2206/2207/7409/5880/2205/3937/5293/7124/241/5336/3635/5321/3562/240/5578/1437/3596/5608/27040
hsa05169	Epstein-Barr virus infection	198	0.506272	1.33577	0.0175983	0.10431	0.0875707	4918	tags=40%, list=27%, signal=30%	2208/1380/930/3440/864/3627/917/916/3569/3683/919/915/695/3443/7128/3117/3112/3111/3118/3135/3451/3113/5293/7124/3122/3447/3115/5336/4939/4609/3123/6890/7097/6772/6891/890/7188/4940/3718/3127/4792/3108/3134/3455/4616/4938/9020/3119/3383/1870/5608/4615/3107/3133/317/23586/567/958/8900/355/3106/3654/10018/578/6773/10379/4067/4791/5295/841/1021/4794/5971/3456/5290/1026/3105/5610/3665/836
hsa05164	Influenza A	168	0.502811	1.31672	0.0408805	0.205031	0.172128	5038	tags=50%, list=27%, signal=37%	3440/3593/3627/3569/23430/3552/64499/3458/3443/3117/3576/3112/5579/7177/114548/6352/3111/3118/356/51284/56000/3451/4261/834/90865/3113/3553/6347/5293/7124/3122/9021/3447/3115/4600/4939/3123/7099/6772/3592/8743/4940/3717/5578/3127/4792/3108/3455/4938/3119/728343/3383/7098/56001/4615/91543/317/390748/64135/23586/402569/3838/8797/355/7113/3606/56649/578/6773/60/10379/5295/841/1021/3459/3456/5290/561…
hsa00380	Tryptophan metabolism	40	0.500703	1.14614	0.288533	0.862951	0.724466	2714	tags=25%, list=15%, signal=21%	3620/259307/8942/8564/6999/316/169355/121278/1543/15
hsa04510	Focal adhesion	198	0.500612	1.32084	0.0227743	0.128007	0.107465	5046	tags=38%, list=27%, signal=28%	4633/859/3909/3381/3676/1293/330/1278/5649/2318/1277/7058/7057/5156/5579/91807/3479/7409/5880/3082/22801/64098/5293/3908/1291/6696/1292/3371/8516/1280/7148/3673/5578/4638/3694/85366/3695/399694/29780/5063/2335/3912/3691/7143/5159/3678/3910/1282/1284/3688/3918/3655/7448/3690/3685/1950/1288/63923/3672/60/9475/2889/5295/4660/3693/3914/87/5908/5290/4659/7094/6093/83660/2316/7791
hsa05219	Bladder cancer	41	0.497735	1.13952	0.288366	0.862951	0.724466	5075	tags=41%, list=27%, signal=30%	7057/3576/1839/1890/4318/4609/4313/4312/1612/1870/9252/4893/1950/3845/1026/11186/4193
hsa04020	Calcium signaling pathway	200	0.495535	1.30846	0.0248447	0.137278	0.115248	3428	tags=32%, list=19%, signal=26%	10345/779/844/5026/952/51806/5737/814/3274/5023/3362/815/5156/3363/487/1129/5579/7852/91807/6547/1816/3973/255231/155/6546/135/154/3360/810/5330/113/5724/489/10800/2769/3357/2915/5336/148/5027/777/1909/491/5578/4843/624/2149/3356/4638/2911/6869/85366/7125/5733/2903/1812/3269/5535/5159/2906/109/57105/553
hsa04912	GnRH signaling pathway	93	0.493361	1.23804	0.148559	0.556668	0.467335	4139	tags=25%, list=22%, signal=19%	2488/779/51806/815/5579/1081/1839/810/5330/113/5321/4323/5578/4313/5337/111/109/5608/3708/5567/775/4893/23236
hsa04115	p53 signaling pathway	71	0.492202	1.20366	0.198844	0.689608	0.578941	5131	tags=32%, list=28%, signal=23%	5268/5054/7057/3479/6241/63970/51512/5366/143686/9133/4616/983/2810/317/8797/355/472/841/1021/1026/836/4193/598
hsa05130	Pathogenic Escherichia coli infection	195	0.490044	1.29161	0.0404984	0.205031	0.172128	5227	tags=39%, list=28%, signal=29%	147945/644672/3569/3071/3576/114548/3059/356/27128/347733/4542/2212/834/3553/7124/64005/7456/81027/837/23562/10381/7099/79861/8743/2846/4671/7280/4792/2149/1902/9071/5063/3554/9871/4615/4644/3688/10097/4627/5777/10672/4430/9074/8797/9138/355/4629/10096/4628/3654/2768/3606/578/149461/4646/10802/7100/60/840/9475/2353/26999/7846/841/10095/10092/4643/6093/836/29108/10376/4790/9076/5010/10109/5062/9632
hsa04971	Gastric acid secretion	76	0.489288	1.20591	0.193622	0.678718	0.569798	4281	tags=36%, list=23%, signal=27%	23439/51806/6750/3274/815/5579/91807/480/478/810/5330/113/389015/5578/1080/4638/85366/3766/111/109/3758/6752/3708/5567/3759/23236/60
hsa04921	Oxytocin signaling pathway	152	0.487816	1.27267	0.0695469	0.338392	0.284088	4914	tags=38%, list=27%, signal=28%	779/59284/59285/952/51806/53632/814/5294/10368/3763/23533/815/786/5579/91807/5997/3760/5743/27091/810/5330/113/7226/4772/146850/5321/5578/4773/1827/4638/85366/5535/4775/111/109/4208/93589/3708/6262/5567/2977/775/3759/4893/23236/60/9475/2353/4660/3845/4846/6263/1026/57118/4659/781/2770/6093
hsa00534	Glycosaminoglycan biosynthesis - heparan sulfate / heparin	24	0.484346	1.02791	0.461738	1	0.839522	5350	tags=42%, list=29%, signal=30%	9955/9953/9956/266722/9348/9957/64131/90161/2131/26035
hsa04216	Ferroptosis	41	0.483752	1.1075	0.337871	0.925597	0.777059	3654	tags=24%, list=20%, signal=20%	246/1536/23305/7018/1356/51703/3162/440738/7037/2182
hsa00051	Fructose and mannose metabolism	30	0.483309	1.05511	0.410191	0.972715	0.816616	1494	tags=10%, list=8%, signal=9%	8789/57016/3101
hsa04611	Platelet activation	122	0.479974	1.22841	0.107875	0.466944	0.39201	4972	tags=46%, list=27%, signal=34%	2811/1281/695/5294/5023/1278/10235/1277/23533/54518/2207/91807/83706/3937/5330/2212/113/5293/6916/10125/5336/146850/5321/5742/2814/64805/9002/3673/2149/4638/85366/111/109/5739/5028/3688/3708/5592/10672/5567/2977/9138/3690/23236/60/9475/4067/5295/4846/5908/5290/4659/2770/7094/6093/83660
hsa04623	Cytosolic DNA-sensing pathway	60	0.479053	1.15188	0.265808	0.841295	0.706286	1800	tags=23%, list=10%, signal=21%	3440/9447/3627/3569/81030/3443/6352/388372/6351/3451/834/90865/3553/3447
hsa00350	Tyrosine metabolism	36	0.478484	1.07661	0.367041	0.957243	0.803627	3338	tags=28%, list=18%, signal=23%	7306/7299/125/259307/137362/316/131/126/124/1621
hsa04964	Proximal tubule bicarbonate reclamation	23	0.476906	1.00829	0.484293	1	0.839522	1385	tags=13%, list=7%, signal=12%	23439/480/478
hsa05206	MicroRNAs in cancer	161	0.476664	1.24551	0.0882353	0.39951	0.335397	5759	tags=50%, list=31%, signal=34%	5268/7057/5156/5579/5743/5293/4318/9839/5328/5336/5292/4609/8626/85414/3162/3371/1946/7148/9493/5578/4082/10642/5243/54541/399694/8651/113130/7143/5159/6935/3678/1870/1591/4170/6624/995/23414/1943/9252/4893/10018/472/3690/578/4851/63923/100532731/7078/5581/4854/5295/8434/1021/3845/4325/10253/4853/8091/994/5290/1026/324/6093/836/2146/4790/659/11186/4193/6654/9759/6774/8503/1786/2885/2744/4363/6659…
hsa05418	Fluid shear stress and atherosclerosis	136	0.475822	1.22955	0.108858	0.466944	0.39201	5071	tags=35%, list=27%, signal=25%	859/51806/3552/3458/7412/653361/4688/6401/5880/658/810/2938/7850/3553/6347/5293/4318/7124/3162/221357/4313/7056/1906/59341/2939/3383/3554/5608/4208/10365/5175/5327/4780/387082/3690/3685/1843/60/2353/5295/2949/652/4846/5290/4790/659/4205
hsa05210	Colorectal cancer	86	0.469675	1.17244	0.227171	0.740579	0.621733	6278	tags=43%, list=34%, signal=29%	1630/374/5880/7043/5293/4609/5366/332/2069/4616/7048/51176/5900/4893/10018/578/1950/2353/5295/3845/5290/1026/324/836/6654/7040/8503/83439/2885/5898/5604/1499/5899/1956/6932/6934/5594
hsa04744	Phototransduction	28	0.469136	1.01607	0.486556	1	0.839522	2442	tags=25%, list=13%, signal=22%	9626/51806/2978/5148/810/5957/2986
hsa05217	Basal cell carcinoma	63	0.466165	1.12706	0.299534	0.873214	0.733083	6279	tags=49%, list=34%, signal=33%	7472/64399/2735/2736/7471/7476/650/51384/7481/4616/7480/51176/81029/7479/7484/7477/51684/578/2737/652/1026/324/7483/83439/8322/1499/8643/80326/6932/6934/7855
hsa04210	Apoptosis	134	0.462842	1.19454	0.137045	0.538273	0.451892	5404	tags=41%, list=29%, signal=29%	3002/1439/330/5551/356/597/1521/5293/1513/7124/6708/63970/3562/5366/332/79861/7185/8743/1520/4792/4001/4616/9020/4170/1522/1075/843/317/3708/8797/355/4893/10018/472/578/60/840/2353/7846/8837/5295/841/3845/5290/836/9451/10376/4790/598/5783/143/8503/1519/4217/142
hsa00532	Glycosaminoglycan biosynthesis - chondroitin sulfate / dermatan sulfate	20	0.461062	0.950596	0.552457	1	0.839522	4305	tags=40%, list=23%, signal=31%	29940/337876/166012/50515/22856/55454/9469/64131
hsa00531	Glycosaminoglycan degradation	19	0.460298	0.945286	0.55526	1	0.839522	3007	tags=16%, list=16%, signal=13%	23553/6677/411
hsa04218	Cellular senescence	155	0.456444	1.19118	0.148421	0.556668	0.467335	5648	tags=35%, list=31%, signal=24%	51806/3569/3552/5054/4605/3576/3805/3135/810/7043/5293/4772/4609/2113/2626/890/4773/59341/1030/9133/3134/4616/5535/4775/1870/7048/2305/983/5608/3107/3133/3708/83593/8900/3106/4893/472/5295/1021/3845/5290/1026/3105/4790/4193/7040/677/8503/204851/2309/4683/3709/144715/91860
hsa04726	Serotonergic synapse	112	0.455762	1.15786	0.219804	0.731003	0.613693	4219	tags=37%, list=23%, signal=28%	779/246/3763/3362/3363/3751/5579/3760/5743/3360/5330/54331/1557/3357/6571/6570/5321/3350/59345/170572/5742/1562/2786/240/121278/2793/5578/94235/51764/3356/3352/9177/111/3708/5567/775/3355/4893/23236/1843/1573
hsa00310	Lysine degradation	58	0.454594	1.08942	0.347929	0.937395	0.786964	12	tags=2%, list=0%, signal=2%	150572
hsa05031	Amphetamine addiction	69	0.452467	1.10283	0.333721	0.921975	0.774018	3341	tags=30%, list=18%, signal=25%	51806/2892/814/815/5579/23237/810/90993/2354/6571/2904/6570/5173/116443/5578/2890/2903/1812/5535/111/2906
hsa04913	Ovarian steroidogenesis	51	0.45195	1.05798	0.393162	0.970992	0.815169	2721	tags=29%, list=15%, signal=25%	2488/1588/3283/1081/3479/6770/3973/5743/113/654/5321/240/8644/1543/3949
hsa05167	Kaposi sarcoma-associated herpesvirus infection	192	0.44936	1.18403	0.139583	0.541716	0.454783	5038	tags=43%, list=27%, signal=31%	3440/51806/1233/2919/3569/1237/5294/3443/23533/3576/131450/1234/942/3055/2920/3135/3451/5743/2921/810/1230/718/5293/54331/3447/4772/4277/5336/146850/59345/4609/6772/2786/2793/3717/94235/1437/4773/51764/7538/4792/1827/57580/3134/3455/5535/4775/3383/1870/7098/5608/51176/3107/3133/1232/3708/355/3106/4893/578/9976/6773/3091/10379/2353/4067/2247/5295/841/1021/3845/3459/3456/5290/1026/3105/5610/3665/83…
hsa04392	Hippo signaling pathway - multiple species	28	0.447405	0.969004	0.546735	1	0.839522	5889	tags=46%, list=32%, signal=32%	9770/166824/122786/79633/8463/8642/7003/55233/11186/83937/92597/26524/79981
hsa05163	Human cytomegalovirus infection	221	0.447325	1.18861	0.122934	0.507297	0.425887	4139	tags=34%, list=22%, signal=27%	3440/51806/3569/3443/5732/5156/3576/3579/1234/5579/7852/6352/3587/3570/356/388372/6351/3135/5880/3451/5743/6387/810/5330/1230/113/90993/3553/6347/5293/54331/7124/3447/4772/5734/59345/4609/6890/6891/414062/2786/6348/7188/2793/5578/94235/4773/51764/4792/5733/3134/5535/4775/111/1870/109/3554/5608/3107/3133/1232/9586/3708/567/10672/5567/9138/355/3106/4893/2768/3690/578/3685/23236
hsa05212	Pancreatic cancer	76	0.447209	1.1022	0.308656	0.884526	0.742579	6630	tags=50%, list=36%, signal=32%	9459/5880/7043/5293/6772/5337/4616/1870/7048/5900/675/578/1950/5295/1021/3845/5888/5290/1026/4790/598/7040/3716/6774/8503/5898/8517/5604/5899/998/1956/5594/5925/10928/1147/5338/2475/1871
hsa04920	Adipocytokine signaling pathway	69	0.446221	1.0876	0.356977	0.947379	0.795346	3654	tags=20%, list=20%, signal=16%	53632/3952/9370/23305/181/7124/9021/51703/3717/4792/3953/7133/5105/2182
hsa00601	Glycosphingolipid biosynthesis - lacto and neolacto series	27	0.443268	0.957591	0.565051	1	0.839522	4889	tags=44%, list=26%, signal=33%	6489/2529/84002/2524/2526/8707/2651/10690/2683/10317/53947/2525
hsa01523	Antifolate resistance	30	0.442905	0.966899	0.540127	1	0.839522	3748	tags=23%, list=20%, signal=19%	3569/3553/7124/2350/390243/10257/1244
hsa04350	TGF-beta signaling pathway	92	0.441521	1.10712	0.320755	0.901431	0.756772	3695	tags=25%, list=20%, signal=20%	26585/5308/3458/7057/1634/3624/353500/658/7043/7124/654/4052/2200/4609/8200/151449/650/1030/8646/56963/7048/10468/653
hsa05203	Viral carcinogenesis	165	0.44143	1.15651	0.191824	0.678718	0.569798	6112	tags=44%, list=33%, signal=30%	1233/1237/1234/3135/90993/718/5293/1960/245972/5966/5366/890/7185/7188/3718/4792/11036/1959/1030/991/3134/983/3107/3133/1232/9586/7533/5567/9734/8900/3106/4893/578/10379/4067/4791/5295/841/1021/3845/7532/6722/87/1654/5290/1026/3105/5610/3665/836/3572/4790/5922/7187/4193/2960/3716/9759/6774/2966/8503/2885/8517/64764/8850/5315/3516/2033/10971/998/7534/6672/1385
hsa04725	Cholinergic synapse	113	0.44128	1.1196	0.275599	0.859264	0.721371	5072	tags=41%, list=27%, signal=30%	779/814/5294/3763/23533/815/1129/5579/3760/1136/5330/113/90993/5293/54331/146850/59345/43/2786/2793/3717/5578/94235/51764/1103/8973/1132/111/109/9586/3708/5567/775/3759/4893/23236/3786/2353/5295/3845/6572/5290/2770/1128/3785/108
hsa05200	Pathways in cancer	525	0.441221	1.20616	0.0380762	0.200207	0.168078	4918	tags=40%, list=27%, signal=30%	3440/238/2322/1630/3575/3909/3593/51806/2251/2250/3569/7472/3561/1439/3458/330/11040/3559/7015/3443/3558/10235/5732/64399/815/5156/3594/3576/2252/3560/5579/7852/3479/3568/3570/356/5979/5880/3082/3451/5743/6387/810/6688/5330/113/8823/2938/7043/5293/2735/3908/1436/54331/4318/2255/115727/3447/10125/354/1441/5336/5292/2736/5734/59345/6775/4609/149233/29119/2113/3162/3562/7471/6772/112399/5366/332/278…
hsa04666	Fc gamma R-mediated phagocytosis	93	0.441118	1.10694	0.309313	0.884526	0.742579	3096	tags=23%, list=17%, signal=19%	5788/653361/7454/5579/3055/7409/2213/5880/2214/2215/2212/5293/2209/5336/273/3635/5321/5578/4082/5337/50807
hsa00512	Mucin type O-glycan biosynthesis	30	0.440165	0.960919	0.552866	1	0.839522	5340	tags=50%, list=29%, signal=36%	26290/11227/11226/114805/192134/8693/55808/9334/117248/55568/6483/2589/56913/100528030/2590
hsa04614	Renin-angiotensin system	23	0.439881	0.930006	0.577225	1	0.839522	1656	tags=22%, list=9%, signal=20%	1359/1511/4142/186/4311
hsa04022	cGMP-PKG signaling pathway	164	0.436785	1.14375	0.214885	0.72219	0.606294	4713	tags=38%, list=26%, signal=29%	4625/779/23439/51806/5140/5294/23533/487/91807/5997/6547/150/480/478/155/6546/154/810/5330/113/90993/489/100271849/4772/148/146850/1909/140/2626/3778/491/4773/624/4638/5139/85366/486/5535/4775/111/109/4208/3779/9586/3708/10335/5592/10672/4985/2977/775/2768/23236/490/146/9475/5581/3764/493/6722/4846/5350/147
hsa04520	Adherens junction	66	0.436697	1.06297	0.387543	0.966143	0.811098	6455	tags=42%, list=35%, signal=28%	7454/5880/6591/29119/10580/7048/51176/1496/5770/6615/5777/9855/60/87/283106/83439/8826/2241/2033/1499/998/5787/1956/6932/1500/6934/5594/7414
hsa04919	Thyroid hormone signaling pathway	121	0.434487	1.11113	0.276757	0.859264	0.721371	5808	tags=44%, list=31%, signal=30%	4625/23439/1735/487/5579/480/478/5330/5293/489/5336/4609/6772/2626/5578/1827/486/9882/5567/4893/3690/3685/23236/8202/4851/3091/60/4854/5295/652/3845/5350/4853/5290/4624/4193/10231/23389/477/8648/488/8503/116931/9969/9282/10499/5469/481/8850/5604/6567/2033/1499
hsa05132	Salmonella infection	249	0.434195	1.16104	0.152508	0.557265	0.467836	5097	tags=29%, list=28%, signal=21%	4633/399/5788/3569/5294/3071/330/838/2318/10333/3576/114548/27128/347733/834/3553/5293/7124/23643/58484/81027/837/10381/338382/4609/7099/7097/79861/8743/4671/7280/4792/197259/5063/6281/9844/5608/4615/51176/929/10097/79026/3798/8797/113146/57381/10096/388/3654/3606/578/4646/7100/60/840/9475/2353/26999/7846/841/10095/10092/5288/5290/302/836/29108/54106/10376/4790/2316/10109
hsa04929	GnRH secretion	64	0.433462	1.04783	0.408615	0.972715	0.816616	4908	tags=38%, list=27%, signal=28%	779/348980/3763/5579/1081/3760/5330/5293/6696/5578/2100/409/408/3782/3708/775/4893/23236/3783/5295/3845/7223/5290/9568
hsa04151	PI3K-Akt signaling pathway	352	0.427633	1.15731	0.129424	0.52089	0.437299	4245	tags=34%, list=23%, signal=27%	8115/9623/930/3440/2322/3575/3909/2251/2250/3381/1440/3569/3676/3561/5294/1293/3559/1278/5649/3443/3558/1277/23533/7058/7057/5156/1129/2252/3560/3479/374/3570/356/118788/3082/3451/22801/5617/90993/8823/3164/5293/3908/1291/1436/54331/2255/3447/1441/146850/6696/1292/59345/4609/7099/5008/4602/3562/7097/3371/8516/1946/2786/1280/7148/3574/2846/9180/2793/3673/3717/5578/3718/94235/51764/6446/2149/3694/1…
hsa05170	Human immunodeficiency virus 1 infection	204	0.42753	1.12949	0.221992	0.731003	0.613693	4116	tags=32%, list=22%, signal=25%	3440/51806/917/916/919/915/3443/1234/5579/7852/356/920/3135/5880/3451/810/5293/25939/684/54331/7124/3447/200315/4772/5336/140564/59345/7099/6890/7097/6891/2786/7188/2793/5578/94235/4773/7465/51764/4792/60489/9133/3134/7133/5063/9582/5535/4775/983/5608/4615/27350/3107/995/3133/3708/567/130340/355/3106/4893/3654/164668/472/578
hsa04750	Inflammatory mediator regulation of TRP channels	98	0.424843	1.07027	0.366556	0.957243	0.803627	4489	tags=36%, list=24%, signal=27%	51806/8989/5732/815/5579/3479/810/5330/113/3553/5293/51393/3357/5336/5321/5734/5578/624/3356/59341/55515/79054/3269/111/109/3554/5608/3708/3556/5567/23236/1573/5581/2150/5295
hsa05205	Proteoglycans in cancer	202	0.424495	1.12168	0.236815	0.756879	0.635417	4918	tags=38%, list=27%, signal=28%	859/3593/7472/4060/1278/2318/1277/815/7057/286/1634/5579/3059/3479/7409/356/3082/117581/1839/2719/7291/5293/4318/7124/5328/287/5336/5329/4609/7099/7097/7471/7476/3673/5578/4313/51384/7481/2335/7480/3678/288/3481/81029/3339/3688/3708/7479/5777/7074/7484/5567/7448/9138/355/4893/7477/3690/3685/3091/60/9475/7078/2247/5295/4660/3693/3845/10855/5290/1026/4659/867/7483/6093/836
hsa04024	cAMP signaling pathway	215	0.423508	1.1238	0.235537	0.756879	0.635417	3478	tags=30%, list=19%, signal=24%	2488/779/23439/51806/6750/5140/2892/814/3362/5732/64399/815/487/1129/1081/7409/1816/480/3973/478/5880/135/154/3360/810/2693/338442/113/90993/116/5293/2735/489/8843/4772/2904/1261/3350/1909/491/116443/1080/4792/56670/2149/1906/5139/2890/5733/2903/5337/3352/486/1812/10257/1260/5142/6755/111/2906/109/51738/2867/6752
hsa05100	Bacterial invasion of epithelial cells	69	0.421329	1.02694	0.445349	0.994409	0.834828	6166	tags=43%, list=33%, signal=29%	859/3059/5293/29119/1759/399694/2335/9844/3678/1496/3688/10097/10096/60/5295/10095/10092/5290/867/26052/10109/8503/391/1499/3611/998/2549/1793/6464/1399
hsa05222	Small cell lung cancer	92	0.418275	1.04883	0.412875	0.972715	0.816616	5131	tags=39%, list=28%, signal=28%	3909/330/5743/5293/3908/4609/7185/7188/3673/4843/4792/1030/4616/2335/3912/1870/3910/1282/1284/317/3688/3918/3655/5915/578/3685/1288/5295/1021/3914/5290/1026/836/4790/7187/598
hsa00590	Arachidonic acid metabolism	59	0.414367	0.994298	0.487059	1	0.839522	2753	tags=29%, list=15%, signal=25%	26279/246/5740/5320/5743/9536/5730/6916/1557/64600/5321/5742/4051/240/151056/8644/27306
hsa04926	Relaxin signaling pathway	128	0.410521	1.05443	0.381974	0.966143	0.811098	5177	tags=38%, list=28%, signal=28%	1281/122042/1278/4322/1277/5330/113/90993/5293/54331/4318/2769/59345/2786/2793/5578/94235/4843/4313/51764/4312/4792/1906/409/399694/111/7048/109/59350/1282/408/1284/9586/5567/3640/4893/23236/1288/2353/5295/3845/4846/5290/2770/59/4790/108/6654/7040
hsa04976	Bile secretion	90	0.41046	1.02803	0.438402	0.994409	0.834828	3371	tags=29%, list=18%, signal=24%	23439/54490/8647/7367/9971/366/54578/480/6579/478/79799/343/113/6555/7364/8431/5244/1080/3949/54659/5243/486/10257/57552/111/109
hsa04072	Phospholipase D signaling pathway	144	0.408021	1.0583	0.371156	0.960292	0.806187	5098	tags=38%, list=28%, signal=27%	5737/5294/2917/2206/23533/5156/3576/3579/2207/27128/2205/5330/113/5293/2915/5336/146850/5321/1606/2846/5578/2149/2911/1902/1759/5337/399694/5159/111/56895/3577/1608/109/553/2912/9162/5900/10672/4254/4893/2768/23236/1950/552/5295/3845/5290/160851/8527/139189/26052/8525/108/6654
hsa00514	Other types of O-glycan biosynthesis	44	0.405766	0.932655	0.586849	1	0.839522	5530	tags=41%, list=30%, signal=29%	6480/26290/4242/11227/11226/114805/3955/8693/79709/117248/55568/2589/2683/285203/56913/100528030/2590/56983
hsa04010	MAPK signaling pathway	292	0.405482	1.09124	0.28252	0.862951	0.724466	4385	tags=31%, list=24%, signal=24%	779/59284/2322/59285/2251/2250/5778/3552/10368/10235/2318/5156/786/2252/5579/3479/374/356/11184/5880/3082/27091/8823/7043/3553/3164/1436/7124/2255/115727/10125/1852/4772/5321/4609/777/11221/1946/5578/3310/1326/409/284/2069/4616/9020/1435/5535/5924/5159/4775/7048/6789/3554/5608/4615/4208/3481/93589/408/1850/929/1844/1943/4908/8817/9252/25780/3556/5567/1847/355/775/4254/4893/3654/2768/1950/1846/184…
hsa04217	Necroptosis	133	0.405298	1.04532	0.405348	0.972715	0.816616	2696	tags=21%, list=15%, signal=18%	3440/246/81030/3552/3458/330/3443/815/7128/1536/114548/356/3451/834/90865/3553/7124/3447/5321/6775/7099/353376/6772/8743/7188/3717/3718/197259
hsa04810	Regulation of actin cytoskeleton	216	0.404288	1.07348	0.320248	0.901431	0.756772	4960	tags=38%, list=27%, signal=28%	4633/2251/2250/3681/3683/3676/3071/5156/1129/2252/7852/91807/7409/3689/9459/5880/22801/3687/6387/8823/3684/5293/2255/8516/2846/3673/624/2149/89846/4638/3694/1902/85366/3695/5063/2335/3691/1132/5159/81624/3678/5305/3682/3688/10097/4627/7074/128239/8817/10672/7114/3655/9138/4629/10096/4628/4893/2768/3690/3685/1950/2246/3672/60/9475/2247/26999/85464/5295/54434/4660/3693/3845/1730/623/10095/87/10092/…
hsa05211	Renal cell carcinoma	65	0.403979	0.978577	0.508691	1	0.839522	6278	tags=45%, list=34%, signal=30%	3082/7043/5293/2113/112399/5063/9915/4893/3091/2889/5295/3845/5908/5290/1026/6654/7040/5062/2034/8503/2885/5604/2033/6513/998/2549/1399/7428/5594
hsa04916	Melanogenesis	101	0.403232	1.0154	0.453245	1	0.839522	4139	tags=28%, list=22%, signal=22%	51806/7306/7472/7299/815/5579/810/5330/113/90993/7471/7476/5578/1906/51384/7481/7480/111/109/51176/81029/7479/7484/5567/4254/4893/7477/23236
hsa05131	Shigellosis	216	0.402611	1.06903	0.32438	0.903828	0.758784	6084	tags=36%, list=33%, signal=24%	4633/3576/114548/6352/3059/27128/3101/5330/834/718/3553/5293/7124/58484/5336/837/7099/7188/4671/1437/4792/9844/3678/3554/4615/929/3688/3708/10097/9252/10096/472/3606/23236/7100/60/9475/5581/5295/3456/10095/87/8915/10092/5290/10892/7094/6093/29108/83660/4790/4193/7321/10109/80201/598/8503/55062/9267/7316/2309/8517/3098/3709/8767/1729/29895/7335/3611/7189/998/382/1793/7334/9265/55072/1956
hsa05213	Endometrial cancer	58	0.402439	0.964436	0.537278	1	0.839522	6278	tags=45%, list=34%, signal=30%	5293/4609/29119/4616/51176/1496/4893/578/1950/5295/3845/5290/1026/324/6654/8503/83439/2885/2309/5604/1499/3611/1956/6932/6934/5594
hsa01521	EGFR tyrosine kinase inhibitor resistance	79	0.401351	0.990165	0.498297	1	0.839522	6084	tags=43%, list=33%, signal=29%	3569/5156/5579/3479/3570/3082/5293/5336/9542/3717/5578/399694/253314/5159/558/4893/10018/1950/2247/5295/3845/5290/6654/598/3716/6774/8503/2885/2309/80310/5604/2549/6464/1956
hsa04068	FoxO signaling pathway	130	0.400921	1.03214	0.431478	0.990575	0.83161	5824	tags=38%, list=32%, signal=27%	3575/3569/53632/3586/2290/3479/5897/356/8698/7043/116986/5293/5347/8743/6648/6446/2911/1030/9133/4616/5896/7048/6789/1901/5105/10365/4893/10018/472/604/1950/80854/5295/1032/3845/5290/1026/4193/6654/7040/6774/8503/10769/2885/2309/5562/1263/5604/2033/10733
hsa04080	Neuroactive ligand-receptor interaction	338	0.399618	1.08074	0.293522	0.869893	0.730295	3597	tags=37%, list=19%, signal=30%	2488/134860/5026/1144/1269/27334/6750/9248/2358/5737/90226/2892/4160/4922/3274/3952/122042/1511/5023/2917/3362/2151/4142/5732/2359/3363/3001/186/1129/8001/2357/9340/1814/2555/1081/1142/5367/59340/150/1816/83551/8698/728/3973/1136/719/10911/155/135/2831/154/3360/5617/2693/53829/1146/116/718/4889/5724/5729/4988/10800/3357/6754/257313/1134/2904/9934/2915/148/5027/3350/5734/2837/2691/84539/1909/2922/…
hsa00140	Steroid hormone biosynthesis	60	0.399225	0.959937	0.545667	1	0.839522	2829	tags=28%, list=15%, signal=24%	54490/1646/7367/1588/3290/3283/54578/79799/6718/1645/1109/7364/8644/1543/54659/9420/6783
hsa05223	Non-small cell lung cancer	72	0.39771	0.975845	0.506329	1	0.839522	5745	tags=42%, list=31%, signal=29%	238/5579/5979/3082/5293/5336/5578/3718/4616/1870/6789/83593/3798/5915/4893/578/1950/5295/1021/3845/5290/1026/11186/6654/6774/8503/2885/2309/5604/27436
hsa04530	Tight junction	166	0.397261	1.03966	0.400839	0.972715	0.816616	5403	tags=32%, list=29%, signal=23%	4633/644672/53632/910/7454/913/911/3059/909/23562/2626/79861/1080/9071/5521/861/912/1740/3688/10097/4627/7074/5567/9074/4629/10096/4628/149461/60/9475/5581/51762/58494/7846/154810/83700/10095/154796/87/10092/9693/6093/10376/57826/9076/5010/10109/11346/55114/23370/7408/49861/4217
hsa05120	Epithelial cell signaling in Helicobacter pylori infection	70	0.397026	0.967641	0.518648	1	0.839522	3350	tags=20%, list=18%, signal=16%	2919/3576/3579/6352/2920/5803/1839/2921/245972/5336/127124/4792/9020/3577
hsa05214	Glioma	75	0.393403	0.96999	0.527273	1	0.839522	5098	tags=33%, list=28%, signal=24%	51806/814/815/5156/5579/3479/810/5293/5336/5578/399694/4616/5159/1870/4893/578/1950/5295/1021/3845/5290/1026/57118/4193/6654
hsa00591	Linoleic acid metabolism	28	0.393339	0.851905	0.708067	1	0.839522	2421	tags=25%, list=13%, signal=22%	26279/246/5320/1557/64600/5321/151056
hsa00052	Galactose metabolism	30	0.392098	0.855984	0.698089	1	0.839522	5604	tags=40%, list=30%, signal=28%	57016/3101/8972/6476/55276/2683/231/2717/3906/80201/5236/3098
hsa04973	Carbohydrate digestion and absorption	46	0.391098	0.908769	0.631579	1	0.839522	3358	tags=28%, list=18%, signal=23%	23439/6518/5579/480/478/3101/5330/5293/278/8972/6476/486/346562
hsa05230	Central carbon metabolism in cancer	69	0.388995	0.948124	0.547674	1	0.839522	5927	tags=45%, list=32%, signal=31%	2322/5156/5979/3101/5293/4609/5163/92483/9123/5159/160287/8140/4893/3091/5295/3845/5290/3939/3418/80201/8503/3417/5223/2744/3098/4916/6510/5604/5315/441531/6513
hsa05034	Alcoholism	106	0.385678	0.976641	0.529794	1	0.839522	4075	tags=25%, list=22%, signal=20%	51806/814/135/810/90993/2354/54331/6571/2904/6570/59345/2786/5173/2793/116443/94235/51764/2903/399694/1812/1392/111/2906/9586/5567/9734/4893
hsa04910	Insulin signaling pathway	137	0.385538	0.996993	0.502132	1	0.839522	3632	tags=14%, list=20%, signal=11%	5506/8789/51806/53632/5140/3101/810/5293/9021/5577/5837/399694/253314/8651/10580/5836/8835/5770/5105
hsa03450	Non-homologous end-joining	12	0.383566	0.725851	0.819832	1	0.839522	7256	tags=50%, list=39%, signal=30%	1791/3981/5591/64421/7518/79840
hsa04110	Cell cycle	124	0.38324	0.980474	0.534483	1	0.839522	7433	tags=45%, list=40%, signal=27%	7043/9700/4609/5347/890/7465/699/1030/991/10744/9133/4616/1870/983/2810/7272/995/7533/8900/472/701/4998/1021/1032/7532/994/1026/10274/4193/8243/5591/7040/9232/10926/996/2033/10971/7534/8317/5925/7529/545/4085/4174/5934/1871/2932/8318/5885/64682/7157/5933/9126/990/1874/1647
hsa04925	Aldosterone synthesis and secretion	98	0.383194	0.965351	0.543743	1	0.839522	1654	tags=16%, list=9%, signal=15%	779/23439/51806/814/815/3283/5579/6770/480/4929/478/810/5330/113/90993/3164
hsa04740	Olfactory transduction	422	0.382711	1.04215	0.388164	0.966143	0.811098	1400	tags=20%, list=8%, signal=19%	121364/390144/120586/390260/403278/26532/403239/441608/401993/150681/390152/81318/128360/26692/282770/390433/219453/390162/127059/119687/219469/219965/8388/390892/390038/219447/219417/219429/390649/390154/390151/390155/219477/120796/81696/219986/26497/390075/441639/256144/4991/219484/390321/390081/219432/128371/390436/81470/51806/81442/125963/441911/390036/401994/79473/219865/127623/390437/81458/…
hsa04720	Long-term potentiation	67	0.380419	0.927711	0.597222	1	0.839522	4139	tags=30%, list=22%, signal=23%	51806/814/815/5579/810/5330/2904/2915/5578/2911/2890/2903/5535/5502/2906/3708/5567/775/4893/23236
hsa05171	Coronavirus disease - COVID-19	228	0.379919	1.01191	0.469136	1	0.839522	2683	tags=23%, list=15%, signal=20%	3440/6123/3593/1440/3627/3569/730/716/51311/729/3443/3558/4142/1536/715/3576/717/5579/114548/3570/714/51284/713/728/719/3451/1839/712/2212/4153/834/5648/2162/718/3553/6347/5293/7124/3447/4600/5336/6403/4939/7099/7097/6772/3592/4940/5578/1437/4312/4792
hsa05030	Cocaine addiction	49	0.379181	0.882945	0.682657	1	0.839522	5000	tags=41%, list=27%, signal=30%	90993/2354/6571/2904/8851/6570/5173/116443/2903/1812/111/2906/2912/8787/9586/5567/1813/627/2770/4790
hsa04927	Cortisol synthesis and secretion	65	0.377432	0.914271	0.618772	1	0.839522	4139	tags=29%, list=22%, signal=23%	779/3283/6770/5330/113/90993/3164/3949/2516/57552/111/109/1584/3284/9586/3708/5567/775/23236
hsa01040	Biosynthesis of unsaturated fatty acids	23	0.377379	0.797862	0.760471	1	0.839522	3932	tags=30%, list=21%, signal=24%	6319/9415/83401/3992/79071/54898/60481
hsa05161	Hepatitis B	161	0.377062	0.985255	0.517857	1	0.839522	5273	tags=39%, list=29%, signal=28%	3440/3569/3443/3576/5579/356/3451/90993/7043/5293/1960/4318/7124/3447/4772/6775/4609/7099/353376/7097/6772/332/890/3717/5578/3718/4773/4792/1959/4775/1870/7048/7098/5608/4615/843/3339/317/9586/64135/23586/8900/355/4893/3654/6773/2353/5295/841/3845/3456/1654/5290/1026/3665/836/4790/7187/6654/7040/3716/6774/8503
hsa04144	Endocytosis	241	0.375154	1.0003	0.500515	1	0.839522	6119	tags=33%, list=33%, signal=22%	859/3561/93661/3559/5156/3579/1234/3560/7852/27128/3135/116986/7456/2350/273/1601/9744/3310/11031/64744/3949/80223/30845/1759/409/3134/5337/50807/390243/7048/3577/3107/408/3133/2869/7037/10097/30011/3798/10096/3106/2870/57154/9815/10095/10092/3105/868/30844/867/8853/26052/4193/829/10109/11021/23362/9267/131890/378/100526767/57132/440073/3312/64750/4218/5371/8411/116984/4734/58533/7189/998/382/508…
hsa04935	Growth hormone synthesis, secretion and action	119	0.370462	0.94587	0.59632	1	0.839522	4139	tags=27%, list=22%, signal=21%	779/6750/5579/3479/5330/2693/113/90993/5293/9021/5336/2691/6772/3717/5578/399694/8651/6755/111/2690/109/5608/51738/6752/8835/9586/3708/5567/775/4893/1442/23236
hsa00830	Retinol metabolism	65	0.366978	0.888947	0.658169	1	0.839522	3014	tags=28%, list=16%, signal=23%	54490/7367/339761/125/54578/79799/316/7364/53630/56603/1562/131/126/10170/220/1543/54659/124
hsa00860	Porphyrin and chlorophyll metabolism	41	0.366758	0.839658	0.719059	1	0.839522	2733	tags=24%, list=15%, signal=21%	54490/7367/212/54578/79799/7364/1356/3162/9843/54659
hsa04922	Glucagon signaling pathway	103	0.366724	0.925405	0.611597	1	0.839522	1584	tags=9%, list=9%, signal=8%	8789/51806/53632/150094/5140/815/810/5330/90993
hsa05017	Spinocerebellar ataxia	139	0.366176	0.945938	0.614316	1	0.839522	3687	tags=16%, list=20%, signal=13%	4654/143471/2892/92552/5649/487/5579/5330/5293/489/2904/3752/5173/116443/5578/2911/2890/2903/7222/2906/1600/3708
hsa04722	Neurotrophin signaling pathway	118	0.366022	0.932342	0.615635	1	0.839522	6290	tags=38%, list=34%, signal=25%	51806/814/815/356/810/5293/11213/5336/4145/4792/399694/4908/9252/10019/4893/3654/397/4215/2889/5295/4794/3845/627/3656/6197/5908/5290/4790/6654/8503/4217/2885/2309/8767/91860/4916/57498/5604/7189/998/2549/6464/1399/5594/6300
hsa04015	Rap1 signaling pathway	207	0.364287	0.96327	0.577801	1	0.839522	5001	tags=37%, list=27%, signal=27%	51806/2251/2250/3683/10235/7057/54518/5156/2252/5579/2357/3479/7409/3689/5880/3082/135/810/3937/5330/113/8823/3684/5293/1436/2255/2904/1946/2846/9002/5578/2149/1902/284/1268/2903/9732/1435/5159/111/109/51466/5608/27040/5028/8631/3688/83593/1943/9855/7074/5900/8817/25780/4254/4893/3690/23236/1950/2246/60/1813/7010/2247/2889/5295/23683/3845/5908/5290/9693/2770/7094/83660/9771/136
hsa04931	Insulin resistance	106	0.363722	0.921041	0.616468	1	0.839522	1756	tags=8%, list=10%, signal=8%	5506/3569/53632/5579/9945/90993/5293/7124/9021
hsa00030	Pentose phosphate pathway	30	0.363017	0.792496	0.778344	1	0.839522	2343	tags=10%, list=13%, signal=9%	8789/8277/84076
hsa04270	Vascular smooth muscle contraction	131	0.362761	0.934584	0.619251	1	0.839522	4351	tags=32%, list=24%, signal=25%	779/26279/51806/5579/91807/5320/135/810/5330/113/64600/148/5321/1909/3778/5578/1906/4638/85366/111/109/553/5739/3779/3708/4627/10335/5592/10672/5567/2977/9138/4629/775/4628/2768/23236/146/9475/10203/552/5581
hsa04215	Apoptosis - multiple species	30	0.362439	0.791235	0.779618	1	0.839522	5131	tags=37%, list=28%, signal=27%	330/5366/332/317/10018/578/840/841/836/57448/598
hsa05220	Chronic myeloid leukemia	76	0.362412	0.893212	0.664009	1	0.839522	6662	tags=45%, list=36%, signal=29%	7043/5293/4609/4792/399694/4616/861/1870/7048/4893/578/2122/5295/1021/3845/5290/1026/867/4790/4193/6654/598/7040/8503/2885/8517/5604/6464/1399/5594/5925/1147/1871/5781
hsa04390	Hippo signaling pathway	154	0.360817	0.940778	0.622363	1	0.839522	5443	tags=36%, list=29%, signal=25%	7472/330/5054/374/353500/3689/658/166824/85409/7043/6591/654/2736/4609/29119/8200/7471/151449/332/7476/122786/650/51384/7481/5521/7480/174/7048/51176/1496/81029/1740/653/7479/8463/7533/7484/7477/2246/60/4086/7003/652/7532/154796/324/7483/55233/659/11186/7040/6657/92597/83439/7159
hsa04713	Circadian entrainment	95	0.360807	0.908069	0.634254	1	0.839522	4139	tags=34%, list=22%, signal=26%	51806/2892/3763/815/5579/3760/810/5330/113/116/54331/2904/59345/2786/2793/5578/94235/51764/2890/2903/111/2906/109/3708/6262/5592/9252/5187/5567/2977/775/23236
hsa05165	Human papillomavirus infection	330	0.359043	0.970723	0.579373	1	0.839522	5098	tags=35%, list=28%, signal=26%	3440/3909/3381/7472/3676/1293/7015/1278/5649/3443/1277/7058/7057/390992/356/3135/3451/22801/5743/90993/5293/3908/1291/7124/3447/245972/4600/6696/1292/5734/3659/7471/4242/6772/3371/8516/127124/1280/8638/890/7148/7476/3673/54626/3694/51384/3695/7481/3134/3955/3455/5521/2335/3912/3691/7143/5159/7480/3678/7098/26508/3107/3910/1282/1284/3133/81029/1740/9586/3688/7479/3918/7484/5567/3655/7448/8900/355/…
hsa04960	Aldosterone-regulated sodium reabsorption	37	0.35808	0.813086	0.753713	1	0.839522	3519	tags=30%, list=19%, signal=24%	23439/5579/3479/480/478/5293/5578/6446/486/3758/2810
hsa04360	Axon guidance	179	0.357505	0.939707	0.620187	1	0.839522	5342	tags=38%, list=29%, signal=27%	1630/22854/815/3897/10512/7852/8482/5880/658/6387/5293/90249/5336/10371/2042/1946/151449/5163/5578/4773/9037/6091/1808/5365/59277/5063/56963/5535/7222/22885/4775/10507/8829/6585/81029/3688/1943/9353/23380/91653/4893/6092/27289/5361/1948/2043/9475/64101/137970/57689/85464/5295/54434/57556/3845/7223/5290/80031/2770/6093/659/5062/9423/4917/8503/64221/55740/2050
hsa04540	Gap junction	86	0.356835	0.890759	0.670379	1	0.839522	5624	tags=47%, list=30%, signal=33%	5156/5579/347733/5330/113/3357/2915/81027/10381/79861/7280/5578/3356/2911/1902/1812/5159/111/109/983/3708/5592/5567/2977/4893/23236/1950/1813/7846/3845/2770/10376/2697/108/6654/2885/5593/3709/80310/2771
hsa04728	Dopaminergic synapse	132	0.355599	0.916736	0.659188	1	0.839522	4335	tags=29%, list=23%, signal=22%	51806/2892/3763/815/5579/1814/3760/1816/810/5330/90993/54331/6571/2904/6570/59345/2786/2793/6323/5578/94235/51764/2890/409/2903/5521/1812/111/408/9586/3708/5567/3798/2774/775/23236/2353/1813
hsa04979	Cholesterol metabolism	49	0.354824	0.826229	0.757688	1	0.839522	4541	tags=31%, list=25%, signal=23%	8647/6770/255738/344/3949/3988/1593/5360/4035/3990/57552/6646/8435/341/4023
hsa00040	Pentose and glucuronate interconversions	33	0.354361	0.784211	0.798982	1	0.839522	1698	tags=18%, list=9%, signal=17%	54490/7367/57016/54578/79799/7364
hsa04724	Glutamatergic synapse	111	0.353939	0.900166	0.676823	1	0.839522	4139	tags=32%, list=22%, signal=25%	2892/2917/5579/6507/3760/6512/5330/6506/113/54331/2904/2915/5321/59345/57030/2786/2793/116443/5578/94235/51764/2899/2911/2890/2903/5337/5535/111/2906/109/2912/3708/54407/5567/775/23236
hsa01524	Platinum drug resistance	71	0.352793	0.862739	0.706358	1	0.839522	5765	tags=39%, list=31%, signal=27%	330/356/2938/5293/5366/332/221357/7153/2939/317/1244/355/472/578/5295/841/2949/5290/1026/836/4193/598/8503/4217/1317/540/5429/5980
hsa04071	Sphingolipid signaling pathway	119	0.352782	0.900729	0.678571	1	0.839522	5769	tags=40%, list=31%, signal=28%	56624/2206/5579/2207/8698/5880/2205/5330/5293/7124/130367/140/204219/5578/624/5337/5521/1903/1901/125981/10672/4985/166929/4893/2768/53637/23236/9475/5581/5295/340485/3845/4846/55012/5290/2770/6093/4790/55304/8503/5523/259230/4217/4363/2771/5604/9517/5519
hsa05204	Chemical carcinogenesis	78	0.351762	0.868116	0.6958	1	0.839522	3049	tags=26%, list=17%, signal=21%	54490/1646/7367/3290/125/54578/5743/79799/2938/7364/1557/1562/131/221357/126/1543/54659/27306/124/2939
hsa00565	Ether lipid metabolism	44	0.351512	0.807951	0.766749	1	0.839522	2461	tags=20%, list=13%, signal=18%	26279/133121/5320/387522/64600/5321/122618/151056/7941
hsa05226	Gastric cancer	147	0.349955	0.90912	0.681481	1	0.839522	4888	tags=31%, list=26%, signal=23%	83998/2251/2250/7472/7015/2252/3082/8823/7043/5293/1045/2255/4609/29119/7471/7476/1015/5243/51384/1030/7481/399694/4616/7480/1870/7048/51176/1496/81029/7479/8817/7484/5915/4893/7477/578/1950/2246/2247/5295/3845/1452/5290/1026/324/7483
hsa00982	Drug metabolism - cytochrome P450	67	0.349877	0.853228	0.710648	1	0.839522	3107	tags=28%, list=17%, signal=24%	54490/7367/125/2327/54578/79799/2938/316/7364/1557/2328/131/221357/126/54659/27306/124/2939/2326
hsa04070	Phosphatidylinositol signaling system	95	0.34737	0.874251	0.696133	1	0.839522	5676	tags=33%, list=31%, signal=23%	51806/5579/810/5330/5293/5336/3635/1606/5578/8821/1608/9162/5305/3708/23236/5295/253430/5288/5290/160851/8527/139189/8525/3633/8503/200576/80271/3709/91860/1607/55613
hsa04066	HIF-1 signaling pathway	107	0.346188	0.876676	0.697068	1	0.839522	3232	tags=21%, list=17%, signal=18%	3569/3458/5054/815/1536/5579/3479/3570/3101/7018/5293/5336/7099/3162/112399/5163/92483/5578/4843/1906/284/253314/160287
hsa03050	Proteasome	45	0.345805	0.799251	0.783951	1	0.839522	3735	tags=11%, list=20%, signal=9%	143471/3458/5698/122706/5699
hsa05020	Prion disease	246	0.343481	0.917695	0.697746	1	0.839522	2575	tags=12%, list=14%, signal=11%	1339/779/859/143471/3569/730/729/3552/653361/1536/6352/714/4688/347733/713/5880/4685/4689/712/90993/3553/5293/7124/2904/81027/10381/79861/7280/116443/3310
hsa04014	Ras signaling pathway	227	0.342772	0.912674	0.701339	1	0.839522	4075	tags=28%, list=22%, signal=22%	26279/2322/51806/2251/2250/7535/10235/5156/3363/2252/5579/3479/356/5320/5880/3082/64926/810/8823/5293/1436/51365/54331/2255/115727/10125/2904/64600/5336/5321/59345/5966/2113/1946/2786/2793/5578/94235/51764/284/2903/5337/399694/5063/1435/23179/5924/5159/6789/27040/2114/3481/27/83593/1943/4908/7074/5900/8817/25780/5567/9462/4254/4893
hsa05032	Morphine addiction	89	0.342696	0.857835	0.724444	1	0.839522	3581	tags=28%, list=19%, signal=23%	5140/3763/5579/2555/3760/113/54331/4988/140679/59345/2786/2793/5578/94235/51764/5139/409/2566/1812/5142/2554/111/109/408/2869
hsa05215	Prostate cancer	97	0.340712	0.85855	0.735912	1	0.839522	6630	tags=48%, list=36%, signal=31%	5156/3479/90993/7850/5293/4318/354/5328/4792/4824/5159/6935/1870/51176/9586/5327/4314/4893/7113/2078/1950/5295/3845/5290/1026/4790/4193/6654/8503/83439/2885/8517/80310/64764/5604/2033/1499/1956/1385/6932/6934/5594/5925/2308/1147/2475/1871
hsa04721	Synaptic vesicle cycle	78	0.340701	0.840819	0.748014	1	0.839522	3083	tags=22%, list=17%, signal=18%	9152/6507/6538/6512/6506/6571/6570/245972/10814/140679/57030/6534/127124/1759/339302/6529/23025
hsa04923	Regulation of lipolysis in adipocytes	54	0.340146	0.801035	0.784597	1	0.839522	3879	tags=28%, list=21%, signal=22%	5140/1081/155/5743/154/113/5293/5742/5346/11343/5733/111/109/5592/5567
hsa04970	Salivary secretion	91	0.338609	0.848824	0.731707	1	0.839522	2641	tags=24%, list=14%, signal=21%	23439/952/51806/4069/1755/5579/480/3346/478/155/154/810/5330/113/6779/148/278/683/3778/491/5578/727897
hsa01522	Endocrine resistance	95	0.338577	0.852121	0.735912	1	0.839522	5730	tags=36%, list=31%, signal=25%	8647/3479/1839/113/5293/4318/4313/2100/399694/111/1870/109/5567/182/4893/8202/4851/2353/638/4854/5295/3845/4853/5290/1026/28514/108/4193/6654/8503/2885/10498/5469/5604
hsa04934	Cushing syndrome	155	0.336515	0.878198	0.747368	1	0.839522	4139	tags=23%, list=22%, signal=18%	779/7472/815/3283/6770/5330/113/90993/3164/7471/7476/3949/51384/1030/7481/2516/23746/1392/57552/7480/111/1870/109/51176/81029/1584/3284/196/9586/3708/7479/7484/5567/775/7477/23236
hsa00592	alpha-Linolenic acid metabolism	24	0.336183	0.713467	0.853437	1	0.839522	2801	tags=25%, list=15%, signal=21%	26279/5320/64600/5321/151056/9415
hsa04622	RIG-I-like receptor signaling pathway	68	0.333993	0.814317	0.781649	1	0.839522	3962	tags=25%, list=21%, signal=20%	3440/3593/3627/3443/3576/3451/56832/7124/3447/3592/4792/54941/843/64135/23586/3467/1540
hsa04918	Thyroid hormone synthesis	75	0.329388	0.812152	0.798864	1	0.839522	3879	tags=24%, list=21%, signal=19%	23439/6528/5579/1081/480/478/5330/113/90993/6906/433/5578/486/111/109/9586/3708/5567
hsa00360	Phenylalanine metabolism	17	0.328635	0.663342	0.867925	1	0.839522	2729	tags=18%, list=15%, signal=15%	259307/137362/10249
hsa04012	ErbB signaling pathway	83	0.32791	0.813947	0.790828	1	0.839522	5273	tags=30%, list=29%, signal=22%	815/5579/374/1839/5293/5336/4609/10718/9542/5578/2069/399694/5063/27/4893/1950/5295/3845/5290/1026/868/867/6654/5062/8503
hsa04727	GABAergic synapse	89	0.327769	0.82047	0.782222	1	0.839522	4038	tags=27%, list=22%, signal=21%	779/3763/5579/2555/6538/113/54331/140679/59345/2786/2793/5578/94235/51764/2566/6529/2554/111/109/2572/5334/54407/5567/775
hsa00330	Arginine and proline metabolism	49	0.325763	0.758559	0.852399	1	0.839522	13	tags=2%, list=0%, signal=2%	1158
hsa04915	Estrogen signaling pathway	137	0.325575	0.841932	0.810235	1	0.839522	4166	tags=26%, list=23%, signal=21%	25984/51806/3861/3872/3763/3868/3760/1839/810/5330/113/90993/5293/4318/8689/4988/390792/3885/2289/3310/4313/2911/2100/399694/3883/111/109/3866/9586/3708/54474/192666/5567/4893/23236/8202
hsa04710	Circadian rhythm	30	0.318219	0.694698	0.886624	1	0.839522	6112	tags=30%, list=33%, signal=20%	53632/6096/5187/8553/4862/5562/8864/406/1385
hsa03320	PPAR signaling pathway	74	0.316871	0.779748	0.838857	1	0.839522	4541	tags=32%, list=25%, signal=25%	2712/9370/23305/4973/51703/2169/7350/6319/4312/729359/1593/9415/5346/5360/10580/1582/5105/2182/2171/4199/2710/2167/28965/4023
hsa05160	Hepatitis C	156	0.313979	0.81916	0.843323	1	0.839522	5273	tags=38%, list=29%, signal=27%	3440/644672/3627/3458/3443/356/3451/5293/7124/9021/3447/4600/23562/4939/4609/6772/4940/4792/3949/9071/3455/4938/5521/1870/7098/91543/317/23586/7533/9074/355/4893/578/1950/149461/6773/10379/439996/8837/5295/841/1021/3845/7532/3456/5290/1026/5610/3665/836/9451/4790/7187/9076/5010/6654/3716/6774/8503
hsa04142	Lysosome	128	0.311512	0.800125	0.851931	1	0.839522	3565	tags=16%, list=19%, signal=13%	9476/1511/23553/1510/7805/1521/6677/1513/245972/6556/54/58511/1520/4125/968/3988/27074/411/2760/1522/1075
hsa05168	Herpes simplex virus 1 infection	488	0.308812	0.842226	0.915408	1	0.839522	4221	tags=16%, list=23%, signal=13%	3440/3593/5452/3569/4049/3458/330/3443/3117/3112/728957/6352/3111/3118/356/56000/5199/168417/3135/3451/3113/718/3553/6347/5293/684/7124/3122/346171/8740/9021/3447/3115/4939/3123/6890/972/7097/6772/6891/29992/64170/3592/7188/4940/3717/3127/4792/3108/440077/3134/10308/3455/4938/3119/728343/3678/7098/56001/4615/3107/94039/3133/317/64135/23586/567/51427/10794/355/3106/3654/374879/3690/578/390980/6773…
hsa00450	Selenocompound metabolism	14	0.308654	0.6111	0.896086	1	0.839522	4740	tags=21%, list=26%, signal=16%	9060/11185/7296
hsa04211	Longevity regulating pathway	89	0.30759	0.769959	0.85	1	0.839522	5072	tags=22%, list=27%, signal=16%	53632/814/9370/3479/113/90993/5293/6648/143686/253314/111/109/9586/5567/4893/5295/3845/5290/4790/108
hsa04978	Mineral absorption	59	0.307361	0.737531	0.868235	1	0.839522	3470	tags=29%, list=19%, signal=23%	23439/26872/6547/480/478/6546/7018/1811/4489/3162/9843/491/4490/7421/486/115019/261729
hsa04928	Parathyroid hormone synthesis, secretion and action	106	0.305161	0.77275	0.878657	1	0.839522	4139	tags=30%, list=22%, signal=24%	8600/4322/5579/4929/1839/5330/64386/113/90993/5744/4323/9935/5578/4326/7421/409/5337/56302/5142/111/109/1591/4208/408/9586/3708/10672/5567/5144/9138/2768/23236
hsa05033	Nicotine addiction	40	0.304807	0.697719	0.895191	1	0.839522	3341	tags=30%, list=18%, signal=25%	2892/2555/2904/140679/57030/116443/2890/2566/8973/2903/2554/2906
hsa05216	Thyroid cancer	37	0.304103	0.69052	0.898515	1	0.839522	6432	tags=49%, list=35%, signal=32%	5979/4609/4616/51176/4893/578/3845/7170/1026/83439/5604/1499/7175/8030/6932/6934/5594/8031
hsa04370	VEGF signaling pathway	59	0.303156	0.727442	0.883529	1	0.839522	2616	tags=15%, list=14%, signal=13%	9047/5579/5880/5743/5293/5336/5321/5578/4773
hsa01210	2-Oxocarboxylic acid metabolism	19	0.301742	0.61967	0.904128	1	0.839522	1218	tags=11%, list=7%, signal=10%	586/137362
hsa05225	Hepatocellular carcinoma	165	0.29977	0.785374	0.885744	1	0.839522	6285	tags=39%, list=34%, signal=26%	7472/7015/5579/3082/2938/7043/5293/5336/4609/3162/7471/7476/221357/5578/51384/7481/399694/4616/2939/7480/1870/7048/51176/3481/81029/7479/7484/4780/4893/7477/578/60/5295/2949/1021/3845/8193/1452/7296/5290/1026/324/7483/6654/598/7040/8503/55193/83439/2885/5604/8322/1499/2549/6464/8110/1956/80326/6932/6595/6934/5594/7855/5925
hsa04742	Taste transduction	85	0.29546	0.736448	0.897664	1	0.839522	4139	tags=35%, list=22%, signal=28%	2555/259287/5330/338398/6326/6335/9033/3350/50834/170572/259296/51764/50838/6328/2911/3352/50836/9177/2554/346562/5028/259286/50835/83756/5567/22953/342372/775/3355/23236
hsa05231	Choline metabolism in cancer	95	0.295244	0.743062	0.897238	1	0.839522	6750	tags=47%, list=37%, signal=30%	7454/5156/5579/5880/6582/5293/6581/5321/1606/5578/5337/5159/1608/9162/5900/204962/4893/1950/3091/2353/5295/3845/5290/160851/8527/139189/8525/6654/8503/2885/80310/1607/5604/5130/6583/8605/1956/60482/5594/126969/5338/2475/56261/8394/1609
hsa00230	Purine metabolism	122	0.294243	0.753067	0.925566	1	0.839522	4558	tags=21%, list=25%, signal=16%	646625/270/5140/5148/7498/113/6241/9615/9060/2986/5139/5142/100/111/109/26289/2977/5313/4907/5144/3614/5145/272/5149/55276/4860
hsa05224	Breast cancer	147	0.292301	0.759345	0.912169	1	0.839522	4957	tags=33%, list=27%, signal=25%	2251/2250/8600/7472/2252/3479/8823/5293/2255/4609/7471/7476/51384/2100/7481/399694/4616/7480/1870/26508/51176/81029/7479/8817/7484/675/182/4893/7477/578/1950/8202/4851/2246/2353/4791/2247/4854/5295/1021/3845/1452/4853/5290/23462/1026/324/7483/28514
hsa00562	Inositol phosphate metabolism	73	0.289116	0.711062	0.910448	1	0.839522	6752	tags=34%, list=37%, signal=22%	5294/5330/5293/5336/3635/8821/5305/23236/253430/55586/5288/5290/3633/200576/23007/80271/55613/9107/64768/3631/9562/5286/8898/8394/9651
hsa05218	Melanoma	72	0.287375	0.70512	0.921749	1	0.839522	1784	tags=12%, list=10%, signal=11%	2251/2250/5156/2252/3479/3082/8823/5293/2255
hsa04310	Wnt signaling pathway	158	0.286898	0.748669	0.929399	1	0.839522	4303	tags=25%, list=23%, signal=19%	7472/9350/6424/6423/22943/815/84870/5579/5176/5880/6425/8061/5330/85409/4772/4609/4920/7471/7476/8549/5578/4773/51384/7481/5535/7480/4775/51176/4919/81029/7479/27123/7484/5567/166336/7477/23236/81839/9475
hsa00071	Fatty acid degradation	42	0.285185	0.65303	0.944238	1	0.839522	3014	tags=14%, list=16%, signal=12%	125/23305/51703/131/126/124
hsa00100	Steroid biosynthesis	20	0.283735	0.58499	0.940239	1	0.839522	4333	tags=25%, list=23%, signal=19%	3988/3930/1591/6646/8435
hsa00010	Glycolysis / Gluconeogenesis	67	0.283522	0.691411	0.923611	1	0.839522	5748	tags=33%, list=31%, signal=23%	8789/125/3101/131/92483/126/124/160287/230/5105/669/5313/55276/130/3939/2203/80201/5236/5223/3098/217/5315
hsa00430	Taurine and hypotaurine metabolism	11	0.280336	0.522375	0.963173	1	0.839522	4405	tags=27%, list=24%, signal=21%	339896/2572/1036
hsa00760	Nicotinate and nicotinamide metabolism	35	0.280187	0.629245	0.94403	1	0.839522	3254	tags=20%, list=18%, signal=17%	952/4837/316/683/23057/27231/10135
hsa04962	Vasopressin-regulated water reabsorption	44	0.280118	0.643851	0.952854	1	0.839522	4384	tags=16%, list=24%, signal=12%	360/90993/109/9586/5567/397/359
hsa04932	Non-alcoholic fatty liver disease	146	0.279314	0.724979	0.940803	1	0.839522	1756	tags=9%, list=10%, signal=8%	1339/3569/53632/3952/3552/9370/3576/3570/356/3553/5293/7124/9021
hsa00600	Sphingolipid metabolism	46	0.278624	0.647419	0.947368	1	0.839522	4520	tags=22%, list=24%, signal=16%	56624/339221/130367/204219/125981/7357/55512/166929/55331/340485
hsa00270	Cysteine and methionine metabolism	47	0.276008	0.641018	0.958435	1	0.839522	1319	tags=9%, list=7%, signal=8%	259307/586/137362/10993
hsa04114	Oocyte meiosis	123	0.27395	0.700764	0.953564	1	0.839522	6458	tags=41%, list=35%, signal=27%	51806/815/3479/810/113/9700/5347/699/6790/991/10744/9133/10734/5535/111/109/983/995/3708/7533/5567/286151/9985/7532/6197/388333/285955/108/8243/9232/26271/3709/91860/441273/996/5604/5519/387778/132864/10971/7534/729597/5533/442590/5594/6300/7529/4085/5501/5530
hsa00515	Mannose type O-glycan biosynthesis	19	0.272976	0.560595	0.946738	1	0.839522	5049	tags=32%, list=27%, signal=23%	146664/2526/84197/10690/2683/148789
hsa04152	AMPK signaling pathway	120	0.27207	0.695396	0.958919	1	0.839522	3094	tags=11%, list=17%, signal=9%	8789/53632/3952/9370/3479/90993/5293/148/890/6319/1080/5521/3953
hsa00061	Fatty acid biosynthesis	17	0.271903	0.548829	0.944744	1	0.839522	3654	tags=18%, list=20%, signal=14%	23305/51703/2182
hsa04213	Longevity regulating pathway - multiple species	62	0.270153	0.651457	0.955451	1	0.839522	5564	tags=31%, list=30%, signal=21%	53632/3479/113/5293/3170/6648/3310/111/109/5567/4893/5295/3845/5290/108/8503/3312/2309/5562
hsa04723	Retrograde endocannabinoid signaling	141	0.268975	0.69559	0.957356	1	0.839522	3371	tags=19%, list=18%, signal=16%	779/2892/3763/5579/2555/3760/5743/5330/113/54331/2915/140679/59345/57030/2786/2793/5578/94235/51764/2911/2890/2566/11343/1268/2554/111/109
hsa04730	Long-term depression	58	0.267294	0.640565	0.963314	1	0.839522	4139	tags=29%, list=22%, signal=23%	2892/5579/3479/10842/5330/5321/5578/2911/2890/1392/3708/5592/10672/2977/4893/2768/23236
hsa00983	Drug metabolism - other enzymes	78	0.266712	0.658219	0.961407	1	0.839522	3249	tags=19%, list=18%, signal=16%	54490/7367/7498/54578/79799/2938/7364/1890/6241/221357/54659/2939/1066/4353/1807
hsa04930	Type II diabetes mellitus	46	0.260838	0.606091	0.965728	1	0.839522	5748	tags=41%, list=31%, signal=29%	9370/3101/5293/7124/9021/777/8651/8835/5313/775/5581/5295/5290/389692/80201/8503/773/3098/5315
hsa04120	Ubiquitin mediated proteolysis	135	0.249	0.642983	0.983957	1	0.839522	7501	tags=36%, list=41%, signal=22%	326/148581/330/9021/90293/11065/991/8651/9886/4281/9246/51465/57154/55236/868/867/4193/7321/57448/7316/64750/9690/8925/5371/996/4734/7189/7334/9320/7318/7428/83737/51366/329/10075/55284/331/8554/4214/7326/7328/64682/9354/84447/11059/9039/92912/26091/55958
hsa04914	Progesterone-mediated oocyte maturation	95	0.247994	0.624144	0.976796	1	0.839522	6354	tags=40%, list=34%, signal=26%	5140/3479/113/5293/5347/890/6793/699/6790/9133/111/109/983/995/5567/8900/5295/3845/994/6197/5290/388333/2770/285955/108/8503/2771/441273/996/5604/387778/132864/729597/2773/442590/5594/6300/4085
hsa04917	Prolactin signaling pathway	70	0.245731	0.598902	0.986014	1	0.839522	5273	tags=34%, list=29%, signal=25%	8600/1081/3973/5617/5293/9021/3659/6772/3717/2100/399694/8651/8835/8792/4893/2353/5295/3845/5290/2001/4790/6654/6774/8503
hsa04330	Notch signaling pathway	53	0.245294	0.577619	0.983173	1	0.839522	6148	tags=38%, list=33%, signal=25%	171558/4242/3955/26508/182/4851/6868/151636/4854/4853/23462/28514/84441/6310/113878/8850/3516/2033/342371/9612
hsa01212	Fatty acid metabolism	52	0.242911	0.569664	0.987864	1	0.839522	3932	tags=19%, list=21%, signal=15%	23305/51703/6319/9415/83401/3992/2182/79071/54898/60481
hsa04550	Signaling pathways regulating pluripotency of stem cells	143	0.242875	0.629167	0.990426	1	0.839522	5341	tags=31%, list=29%, signal=22%	7472/3624/3479/3198/658/5293/1852/4609/7471/7476/3717/3976/3718/9314/51384/7481/7480/3977/81029/7479/7484/2103/4893/7477/3720/100532731/4086/2247/4211/5295/652/6498/3845/5290/324/7483/3572/80712/659/3716/6774/8503/3231/6657
hsa03460	Fanconi anemia pathway	49	0.241238	0.561736	0.99016	1	0.839522	6402	tags=35%, list=35%, signal=23%	641/79008/675/2187/5888/2175/84464/83990/57697/55215/2072/5429/5980/2177/8940/545/29935
hsa05022	Pathways of neurodegeneration - multiple diseases	444	0.240223	0.653825	0.998996	1	0.839522	4139	tags=16%, list=22%, signal=13%	1339/779/51806/143471/3569/7472/2892/3552/92552/22943/815/1536/487/5579/356/1769/347733/5743/810/2861/5330/3553/489/7124/2904/8851/2915/81027/10381/7471/79861/7476/5173/7280/5578/4843/7345/2911/50507/51384/2890/7481/2903/9627/7133/1435/5535/7222/7480/2906/5608/4747/146754/81029/317/3708/7479/6262/27123/7484/196385/3798/1767/9246/355/775/4893/51465/7477/177/578/23236
hsa00564	Glycerophospholipid metabolism	89	0.235457	0.589395	0.987778	1	0.839522	3464	tags=17%, list=19%, signal=14%	26279/5320/51365/64600/5321/43/1606/122618/151056/162466/1103/5337/56895/1608/9162
hsa00520	Amino sugar and nucleotide sugar metabolism	47	0.229376	0.532717	0.99511	1	0.839522	1594	tags=6%, list=9%, signal=6%	9945/3101/80896
hsa05010	Alzheimer disease	340	0.229178	0.620015	1	1	0.839522	5000	tags=21%, list=27%, signal=16%	1339/779/51806/143471/3569/7472/3552/22943/1536/487/347733/5743/810/5330/3553/4311/5293/489/7124/2904/8851/2915/81027/10381/7471/79861/7476/7280/4843/50507/51384/7481/4035/2903/1435/5535/7480/2906/81029/317/3708/7479/27123/7484/3798/355/775/4893/7477/177/23236/840/6868/7846/5295/841/4023/3845/1452/6263/5290/324/7483/5610/283106/836/9451/1128/10376/23621/4790
hsa00410	beta-Alanine metabolism	30	0.219676	0.479572	0.992357	1	0.839522	4894	tags=27%, list=26%, signal=20%	339896/1807/2572/51733/8639/54498/1806/314
hsa00900	Terpenoid backbone biosynthesis	22	0.207039	0.43452	0.996068	1	0.839522	7784	tags=50%, list=42%, signal=29%	91734/3158/39/10269/23590/3157/51449/57107/3422/3156/116150
hsa00510	N-Glycan biosynthesis	50	0.204072	0.475824	0.997546	1	0.839522	5289	tags=20%, list=29%, signal=14%	4121/6480/146664/4124/11320/4247/2683/2530/4248/440138
hsa04141	Protein processing in endoplasmic reticulum	162	0.183405	0.479308	1	1	0.839522	7541	tags=35%, list=41%, signal=21%	92552/85479/91319/81567/4121/3310/79748/9871/10484/9709/4780/51465/578/10802/23645/80267/10525/56886/5610/6400/9451/9695/7321/22872/5611/9632/10970/4217/3312/3301/54431/7991/10808/23471/10130/6745/440275/7415/55741/79139/7326/201595/23190/22926/6748/9373/27248/84447/9532/26270/3303/55666/10427/29927/56681/3337
hsa04150	mTOR signaling pathway	152	0.179326	0.467844	1	1	0.839522	4090	tags=14%, list=22%, signal=11%	7472/5579/3479/5293/7124/7471/127124/7476/5578/6446/51384/54541/7481/253314/7480/81029/220441/7479/8140/7484/4893/7477
hsa00513	Various types of N-glycan biosynthesis	38	0.176279	0.400156	0.998755	1	0.839522	4662	tags=21%, list=25%, signal=16%	4121/4124/83539/64377/11320/4247/2683/2530
hsa03013	RNA transport	163	-0.120837	-0.412231	1	1	0.839522	5934	tags=37%, list=32%, signal=25%	10209/80145/10419/50628/10556/7341/132430/8487/23511/1975/1207/9513/11269/1915/22794/8667/6607/29107/10921/8664/10284/8662/7329/10073/8480/2521/9984/4116/10289/55520/79833/3646/8893/8086/54960/8892/11260/8890/8665/8668/94026/1974/10557/79228/55998/65110/8891/51367/84321/8666/1917/80336/10248/79897/138716/23435/54913/728689/340529/8637
hsa03022	Basal transcription factors	44	-0.146617	-0.409089	1	1	0.839522	15772	tags=100%, list=85%, signal=15%	138474/6875/2960/2966/6873/6884/2969/728340/83860/9519/2957/6872/2967/27097/6877/6874/8148/129685/2959/6879/6880/4331/2963/51616/2071/902/2965/6883/6908/6882/2958/2961/6878/1022/10629/2962/9569/54457/404672/387332/6881/2968/2068
hsa03018	RNA degradation	75	-0.169745	-0.524215	1	1	0.839522	5207	tags=29%, list=28%, signal=21%	27258/118460/9924/80349/23658/11340/3313/3329/23404/5213/2026/51013/57819/51690/23016/80336/25804/5214/54512/56915/340529/2027
hsa03440	Homologous recombination	37	-0.171241	-0.458946	1	1	0.839522	15317	tags=100%, list=83%, signal=17%	675/472/5888/83990/4683/8940/580/29935/8438/146956/11073/7156/5932/10111/672/51720/7516/5424/10714/5889/5890/79184/5892/6117/57804/25788/79728/80198/29086/5893/7517/6742/6118/50511/6119/5425
hsa04137	Mitophagy - animal	66	-0.174621	-0.520482	1	1	0.839522	4331	tags=30%, list=23%, signal=23%	55288/84749/7942/11337/9927/79735/5602/89941/1459/664/11345/6233/6237/7311/54543/8878/1460/3265/51024/1869
hsa03015	mRNA surveillance pathway	96	-0.197721	-0.62357	1	1	0.839522	1128	tags=3%, list=6%, signal=3%	23435/340529/5522
hsa00620	Pyruvate metabolism	39	-0.207617	-0.563199	0.989474	1	0.839522	4703	tags=44%, list=25%, signal=33%	2739/3945/4190/55902/223/224/5160/4191/5161/38/84532/9380/5106/3029/97/5091/197257
hsa03008	Ribosome biogenesis in eukaryotes	73	-0.222643	-0.692404	0.984733	1	0.839522	4329	tags=27%, list=23%, signal=21%	27341/51096/55505/10557/2091/55998/92856/1459/55272/51367/10607/28987/10436/10248/55651/5822/1460/138716/54913/345630
hsa04130	SNARE interactions in vesicular transport	33	-0.224729	-0.600415	0.962963	1	0.839522	14330	tags=33%, list=78%, signal=7%	6810/10490/662/8674/8675/8673/6844/9482/6809/55850/6843
hsa03040	Spliceosome	134	-0.226596	-0.76489	0.985294	1	0.839522	5207	tags=32%, list=28%, signal=23%	27258/27316/51639/6634/9092/2521/9984/25766/23658/4116/153527/6635/6430/8896/27339/22827/199746/24148/6631/144983/8175/10465/343069/6100/6628/51503/57819/26121/51690/25949/6625/100534599/10084/5356/83443/84321/10907/25804/151903/10450/56949/6633/6626
hsa05016	Huntington disease	279	-0.231362	-0.829737	1	1	0.839522	4034	tags=34%, list=22%, signal=27%	148327/7417/5702/10891/5432/5602/6390/5695/3065/4700/4704/9167/4710/5468/201625/5694/5705/7388/55967/1349/4698/89953/5691/4712/2878/5714/6647/387332/4731/1742/1347/4729/4722/56901/127602/5437/4705/9377/1212/29796/4702/4706/7381/4694/291/4724/1537/7384/1211/2902/11258/4723/440567/4717/1337/10975/4725/4697/1340/1345/374291/27089/4707/1327/4716/5441/5435/1350/1351/5439/4728/4695/54539/4726/4714/3419…
hsa05012	Parkinson disease	221	-0.232988	-0.831063	1	1	0.839522	4128	tags=39%, list=22%, signal=31%	4711/5715/9927/7417/5702/5602/6390/25828/5695/4700/4704/9167/4710/5694/5705/7388/55967/1349/4698/89953/10131/5691/4712/5714/4731/6233/11315/1347/4729/4722/56901/7311/4705/9377/29796/4702/4706/7381/4694/291/4724/1537/7384/4723/440567/5568/4717/1337/4137/10975/4725/4697/1340/1345/374291/27089/4707/1327/4716/1350/1351/4728/4695/54539/4726/4714/341947/4715/4718/2778/1329/4128/83447/4696/4708/4713/347…
hsa05110	Vibrio cholerae infection	49	-0.236592	-0.672132	0.957672	1	0.839522	3425	tags=27%, list=19%, signal=22%	51382/534/9550/245973/535/533/537/155066/5568/3784/2778/525/50617
hsa00240	Pyrimidine metabolism	57	-0.239561	-0.70164	0.957055	1	0.839522	2041	tags=18%, list=11%, signal=16%	115024/30833/83549/4833/4832/5169/56953/377841/5167/100526794
hsa05014	Amyotrophic lateral sclerosis	334	-0.246727	-0.898605	0.866667	1	0.839522	3024	tags=23%, list=16%, signal=19%	5714/6647/11345/4731/1347/5217/4729/4722/56901/127602/4705/9377/29796/4702/10280/4706/7381/4694/4724/1537/7384/8878/2902/11258/4723/440567/4717/1337/10975/4725/4697/145957/1340/572/1345/374291/27089/4707/1327/4716/9973/1350/1351/4728/4695/54539/4726/4714/341947/4715/4718/1329/375189/400916/4696/4708/23435/4713/347688/84701/126328/4701/51079/345456/50613/147700/10382/1346/112714/27019/1649/5630/25…
hsa04146	Peroxisome	82	-0.249253	-0.777143	0.920354	1	0.839522	4338	tags=40%, list=23%, signal=31%	10901/8800/4598/23417/8310/51179/5195/8309/23600/5824/5192/30/10455/83594/8528/10005/6647/4358/5827/255027/5191/2053/10654/5190/9409/1891/3155/25824/92960/26063/5264/54363/189
hsa00280	Valine, leucine and isoleucine degradation	47	-0.252512	-0.711008	0.907609	1	0.839522	4237	tags=47%, list=23%, signal=36%	549/18/223/197322/3028/224/30/4329/5096/1892/3712/56922/26275/38/10449/3032/35/64902/587/3033/3155/27034
hsa00480	Glutathione metabolism	54	-0.252585	-0.727676	0.935673	1	0.839522	3668	tags=35%, list=20%, signal=28%	2686/2950/9446/79094/4257/4259/2878/9588/2937/2944/2948/2947/79017/2879/119391/2946/124975/2940/257202
hsa00220	Arginine biosynthesis	22	-0.258839	-0.626914	0.90795	1	0.839522	3414	tags=41%, list=18%, signal=33%	435/384/2805/95/445/100526760/27165/2875/4842
hsa03410	Base excision repair	33	-0.261228	-0.697932	0.888889	1	0.839522	5640	tags=42%, list=31%, signal=30%	56655/7374/3978/10038/7515/5427/79661/23583/252969/27343/4595/4913/5425/4350
hsa00670	One carbon pool by folate	19	-0.266289	-0.627054	0.904382	1	0.839522	4043	tags=53%, list=22%, signal=41%	123263/441024/10588/471/6472/100528021/275/6470/10841/10840
hsa01240	Biosynthesis of cofactors	149	-0.268765	-0.909125	0.75	1	0.839522	3102	tags=27%, list=17%, signal=23%	8566/2937/112724/51004/54577/7390/60490/84274/203/5805/11019/349565/54995/6697/493911/6470/587/7389/4833/158067/4832/54600/9249/10243/326625/93100/53354/29968/7365/9104/1728/4143/54579/54658/54575/23475/250/7363/248/54657
hsa04140	Autophagy - animal	135	-0.273838	-0.927336	0.61194	1	0.839522	97	tags=9%, list=1%, signal=9%	1508/3476/8878/5568/5296/3265/572/64223/23604/58528/3630/118471
hsa03420	Nucleotide excision repair	46	-0.278734	-0.774008	0.848649	1	0.839522	7173	tags=61%, list=39%, signal=37%	6117/5985/5983/57804/2071/5984/902/1643/2965/1161/56655/1022/9978/2073/3978/5982/5887/1069/5886/5427/2067/404672/6118/7507/6119/2968/2068/5425
hsa03430	Mismatch repair	23	-0.279522	-0.684462	0.857143	1	0.839522	7173	tags=57%, list=39%, signal=35%	6117/5985/5983/57804/5984/4436/27030/3978/5982/6742/6118/6119/5425
hsa00640	Propanoate metabolism	33	-0.281387	-0.751791	0.824074	1	0.839522	5646	tags=52%, list=31%, signal=36%	593/84693/5095/3945/8801/23417/55902/8310/18/4329/5096/1892/26275/38/84532/35/8802
hsa00250	Alanine, aspartate and glutamate metabolism	35	-0.281958	-0.74853	0.808081	1	0.839522	3414	tags=34%, list=18%, signal=28%	435/8528/7915/2805/440/339983/64902/445/27165/2875/8659/189
hsa00500	Starch and sucrose metabolism	34	-0.284328	-0.754426	0.802956	1	0.839522	1631	tags=21%, list=9%, signal=19%	5169/2998/280/2538/11181/5167/279
hsa00511	Other glycan degradation	17	-0.284483	-0.669215	0.834615	1	0.839522	5276	tags=47%, list=29%, signal=34%	129807/64772/2629/4126/4123/3074/3073/4758
hsa04136	Autophagy - other	31	-0.287116	-0.751299	0.820276	1	0.839522	13179	tags=100%, list=71%, signal=29%	10533/285973/2475/84938/8678/9140/5289/30849/55102/9776/57521/55054/5515/115201/9474/23710/5516/64422/23130/9706/79065/83734/26100/60673/23192/11337/84971/11345/3476/64223
hsa00650	Butanoate metabolism	28	-0.287265	-0.732311	0.809955	1	0.839522	3237	tags=32%, list=18%, signal=27%	1892/56898/7915/38/35/3033/3155/622/142827
hsa04911	Insulin secretion	86	-0.30802	-0.958696	0.557692	1	0.839522	1236	tags=17%, list=7%, signal=16%	482/2778/6616/3767/107/6514/10242/816/3780/2641/117/5582/139760/2695/3630
hsa01200	Carbon metabolism	116	-0.309032	-1.02173	0.388235	0.966143	0.811098	4292	tags=41%, list=23%, signal=32%	3420/4190/55902/8310/2645/51179/6390/5213/2821/2026/3421/4329/6472/5096/5160/1892/226/4191/26275/414328/5161/7086/38/84532/2805/275/35/283871/25796/8802/6470/5214/5091/113675/2653/26227/29968/48/2875/9104/55753/221823/2027/2731/229/54363/5232/189
hsa00340	Histidine metabolism	21	-0.312879	-0.759977	0.749004	1	0.839522	4629	tags=48%, list=25%, signal=36%	131669/218/223/224/144193/222/84735/4128/10841/57571
hsa04714	Thermogenesis	203	-0.313596	-1.0981	0.210526	0.719854	0.604333	2965	tags=33%, list=16%, signal=28%	4731/1347/4729/4722/56901/1376/4705/9377/29796/4702/10063/28958/4706/7381/51287/4694/4724/91942/1537/7384/493753/4723/440567/5568/4717/25915/6604/1337/3265/10975/6194/4725/4697/1340/1345/84987/374291/27089/4707/1327/4716/64223/1350/1351/4728/4695/54539/4726/4714/341947/4715/4718/2778/1329/4696/4708/4713/84701/107/126328/4701/123096/51079/51412/4879/1346/2641/26291
hsa00980	Metabolism of xenobiotics by cytochrome P450	72	-0.313676	-0.966836	0.511278	1	0.839522	2139	tags=35%, list=12%, signal=31%	1571/1544/1548/2948/2947/1565/874/54600/1549/119391/127/374875/2946/22977/1553/7365/6822/27294/1555/54579/54658/2940/54575/7363/54657
hsa01230	Biosynthesis of amino acids	73	-0.322756	-1.00375	0.412214	0.972715	0.816616	2354	tags=41%, list=13%, signal=36%	29920/5213/2026/3421/6472/435/226/384/7086/2805/440/95/6470/587/445/100526760/5214/5091/113675/875/26227/29968/48/2875/5053/221823/2027/4143/229/5232
hsa03030	DNA replication	36	-0.330213	-0.890368	0.626866	1	0.839522	7424	tags=64%, list=40%, signal=38%	2237/54107/6117/5985/5983/57804/5984/5557/4172/23649/56655/3978/5982/6742/4171/79621/4176/5427/6118/10535/6119/5425/84153
hsa00062	Fatty acid elongation	23	-0.335639	-0.821876	0.663866	1	0.839522	4716	tags=52%, list=26%, signal=39%	10965/117145/6785/641371/1892/79993/9524/10449/3032/51102/3033/122970
hsa00790	Folate biosynthesis	24	-0.344669	-0.852075	0.640693	1	0.839522	1343	tags=33%, list=7%, signal=31%	5805/5092/6697/7166/10243/5053/250/248
hsa03060	Protein export	22	-0.347659	-0.842038	0.65272	1	0.839522	6548	tags=59%, list=35%, signal=38%	9789/6728/6726/55176/23480/6727/6730/28972/10952/196294/5018/23478/83943
hsa04974	Protein digestion and absorption	102	-0.359673	-1.15196	0.153846	0.557265	0.467836	589	tags=11%, list=3%, signal=10%	5222/643847/5644/1358/1504/440387/63036/1360/1357/23436/10136
hsa04966	Collecting duct acid secretion	27	-0.388267	-0.973381	0.490826	1	0.839522	4508	tags=48%, list=24%, signal=36%	529/9296/1188/496/51382/760/534/9550/245973/535/155066/525/50617
hsa00053	Ascorbate and aldarate metabolism	30	-0.394716	-1.02245	0.414747	0.972715	0.816616	863	tags=23%, list=5%, signal=22%	7365/9104/54579/54658/54575/7363/54657
hsa04340	Hedgehog signaling pathway	46	-0.402052	-1.11645	0.286486	0.862951	0.724466	9	tags=7%, list=0%, signal=7%	5568/122011/3549
hsa00260	Glycine, serine and threonine metabolism	39	-0.408313	-1.10763	0.3	0.873214	0.733083	2620	tags=38%, list=14%, signal=33%	9380/275/6470/64902/23464/113675/2653/875/4128/26227/29968/2593/2628/2731/189
hsa00020	Citrate cycle (TCA cycle)	30	-0.421835	-1.0927	0.341014	0.926421	0.777751	5350	tags=53%, list=29%, signal=38%	5162/2271/6392/8801/3420/4190/6390/3421/5160/4191/5161/5106/8802/5091/48/55753
hsa00563	Glycosylphosphatidylinositol (GPI)-anchor biosynthesis	25	-0.42926	-1.07992	0.357447	0.947379	0.795346	4768	tags=44%, list=26%, signal=33%	54965/128869/55650/8733/2822/51227/80235/5283/9091/9487/8818
hsa00072	Synthesis and degradation of ketone bodies	10	-0.437426	-0.96415	0.495114	1	0.839522	2896	tags=40%, list=16%, signal=34%	56898/38/3155/622
hsa04961	Endocrine and other factor-regulated calcium reabsorption	53	-0.445897	-1.28006	0.1	0.440541	0.369844	176	tags=13%, list=1%, signal=13%	482/2778/2099/5582/3816/5741/492
hsa00561	Glycerolipid metabolism	52	-0.449945	-1.29147	0.11236	0.469605	0.394244	947	tags=15%, list=5%, signal=15%	84649/346606/116255/1056/5407/8513/119548/5406
hsa03020	RNA polymerase	31	-0.480977	-1.25858	0.211982	0.719854	0.604333	5663	tags=48%, list=31%, signal=34%	84172/548644/5436/30834/51082/5434/5432/51728/64425/5437/9533/5441/5435/5439/5438
hsa00190	Oxidative phosphorylation	105	-0.514854	-1.63585	0.0125	0.0822713	0.0690686	3852	tags=69%, list=21%, signal=55%	6390/4700/4704/9167/4710/51606/7388/55967/1349/496/4698/51382/534/9550/245973/4712/4731/1347/4729/4722/56901/535/4705/9377/29796/4702/533/10063/4706/7381/4694/4724/1537/7384/537/155066/4723/440567/4717/1337/10975/4725/4697/1340/1345/64077/374291/27089/4707/1327/4716/1350/1351/4728/4695/54539/4726/4714/341947/4715/4718/1329/4696/4708/4713/525/84701/126328/4701/51079/1346/50617
hsa00970	Aminoacyl-tRNA biosynthesis	25	-0.528473	-1.32952	0.153191	0.557265	0.467836	5426	tags=64%, list=29%, signal=45%	10352/10667/123263/23438/79731/124454/51091/2193/118672/79587/57176/80222/5188/10056/25973/54938
hsa04972	Pancreatic secretion	100	-0.534138	-1.70199	0.0106383	0.0744047	0.0624644	371	tags=24%, list=2%, signal=24%	280/482/2778/6344/107/391013/1056/84647/5407/5319/30814/5644/1358/279/1504/5582/440387/63036/1360/1357/23436/492/10136/5406
hsa04950	Maturity onset diabetes of the young	26	-0.544633	-1.37592	0.134783	0.535843	0.449852	97	tags=19%, list=1%, signal=19%	3087/6514/3630/3375/3110
hsa00730	Thiamine metabolism	14	-0.569766	-1.26664	0.191571	0.678718	0.569798	245	tags=36%, list=1%, signal=35%	203/84284/158067/250/248
hsa04975	Fat digestion and absorption	39	-0.625627	-1.69713	0.0157895	0.0953216	0.0800246	947	tags=36%, list=5%, signal=34%	84649/346606/391013/1056/335/64241/84647/5407/8513/2168/5319/30814/1208/5406
hsa04977	Vitamin digestion and absorption	23	-0.63998	-1.56711	0.0336135	0.179639	0.150811	793	tags=13%, list=4%, signal=12%	335/5948/5406
hsa03010	Ribosome	134	-0.651361	-2.19871	0.0147059	0.090455	0.075939	4197	tags=82%, list=23%, signal=64%	64969/64963/6232/51187/6231/51065/100529097/6128/51081/65003/51073/29093/51373/6142/64979/64960/6147/6230/6176/6207/6228/3921/55052/6134/124995/6129/6222/6233/6146/6183/6166/6122/64965/6156/6235/64968/23521/51116/6139/7311/6205/6135/6188/100529239/6138/6144/6189/6223/6206/10573/4736/6217/6155/6143/6210/54460/6124/6187/63875/6133/6224/6201/6167/6154/6203/6165/6193/6192/6158/9349/6125/6202/6229/512…
hsa00910	Nitrogen metabolism	17	-0.664998	-1.56433	0.0730769	0.345262	0.289855	2179	tags=41%, list=12%, signal=36%	762/766/23632/771/765/768/767
hsa00630	Glyoxylate and dicarboxylate metabolism	29	-0.66573	-1.70222	0.0135747	0.0861522	0.0723267	4361	tags=69%, list=24%, signal=53%	125061/4190/55902/51179/6472/5096/4191/38/81888/84532/9380/275/283871/6470/2653/48/112817/2731/54363/189
hsa00130	Ubiquinone and other terpenoid-quinone biosynthesis	11	-0.679051	-1.50877	0.111486	0.469605	0.394244	5093	tags=73%, list=28%, signal=53%	10229/3242/79001/51805/51004/84274/6898/1728

## Sheet: S3
Table S3 GSEA enrichment analysis in GEO combine set
GSEA enrichment analysis of ICIcluster 1 and ICIcluster 2
ID	Description	setSize	enrichmentScore	NES	pvalue	p.adjust	qvalues	rank	leading_edge	core_enrichment
hsa05150	Staphylococcus aureus infection	82	0.868157	2.61659	0.00137741	0.00747822	0.00539231	1082	tags=55%, list=5%, signal=52%	2213/3117/728/2359/2214/716/713/3113/3122/714/3108/629/3689/718/712/1672/3866/719/3127/2212/3383/3684/3123/3075/3115/715/3683/3880/9103/2209/3112/5724/2215/2357/3111/717/1675/3119/6404/1667/3861/3126/6403/3426/3860
hsa05310	Asthma	28	0.854171	2.16747	0.00171233	0.00756664	0.00545607	1729	tags=57%, list=8%, signal=52%	3117/2207/3113/3122/3108/2205/3127/3123/3115/3112/3111/3119/3126/958/3586/3109
hsa04672	Intestinal immune network for IgA production	45	0.835955	2.29677	0.0015748	0.00747822	0.00539231	2121	tags=60%, list=10%, signal=54%	10673/3117/3569/3113/942/3122/3108/608/3127/3123/3676/3115/3112/5284/3111/3600/3119/7852/3126/29851/3601/958/3586/6387/3109/941/3695
hsa05332	Graft-versus-host disease	40	0.834437	2.25305	0.00161812	0.00747822	0.00539231	2758	tags=72%, list=14%, signal=63%	3117/3821/3569/3113/942/3122/3108/355/3127/3123/3002/3115/3112/3553/3111/3134/3119/3126/3106/3135/3107/3109/941/3133/356/3824/3458/5551/3105
hsa04061	Viral protein interaction with cytokine and cytokine receptor	94	0.834352	2.55584	0.0013459	0.00747822	0.00539231	1055	tags=47%, list=5%, signal=45%	10563/6364/6362/3576/6373/3627/3606/4283/6347/6363/2920/6351/6355/6357/1230/3561/6348/2921/3569/6352/6375/3560/2919/1236/729230/6374/1234/3587/9547/6367/5473/6354/8743/6361/1436/6368/51554/3570/1235/8794/8797/7852/8795/3579
hsa05330	Allograft rejection	35	0.827913	2.17314	0.00166945	0.00747822	0.00539231	2758	tags=77%, list=14%, signal=67%	3117/3113/942/3122/3108/355/3127/3123/3002/3115/3112/3111/3134/3119/3126/3106/3135/958/3586/3107/3109/941/3133/356/3458/5551/3105
hsa05322	Systemic lupus erythematosus	51	0.824642	2.30797	0.00156495	0.00747822	0.00539231	1729	tags=55%, list=8%, signal=50%	3117/2214/716/713/3113/942/3122/714/3108/718/712/3127/2212/3123/3115/715/2209/3112/2215/3111/717/3119/3126/730/958/1991/3586/3109
hsa05140	Leishmaniasis	74	0.808248	2.38808	0.00144092	0.00747822	0.00539231	2003	tags=53%, list=10%, signal=48%	4688/5743/3117/2214/4689/3113/3122/3108/1536/3689/718/3127/2212/7097/3684/3123/7042/3676/3115/653361/9103/2209/3112/6772/2215/3553/3111/3119/3717/3126/51135/4615/5594/3586/3109/5579/7099/1378/2353
hsa04940	Type I diabetes mellitus	41	0.805166	2.17858	0.00161551	0.00747822	0.00539231	2758	tags=63%, list=14%, signal=55%	3117/3113/942/3122/3108/355/3127/3123/3002/3115/3112/3553/3111/3134/3119/3126/3106/3135/3107/3109/941/3133/356/3458/5551/3105
hsa05416	Viral myocarditis	57	0.792405	2.26428	0.0014881	0.00747822	0.00539231	1930	tags=49%, list=9%, signal=45%	3117/5880/3113/942/3122/3108/3689/1604/3127/3383/3123/3115/3683/3112/3111/284217/6444/3134/3119/3126/3106/3135/958/857/3107/3109/637/941
hsa05340	Primary immunodeficiency	36	0.787015	2.0683	0.00165289	0.00747822	0.00539231	1556	tags=50%, list=8%, signal=46%	3575/3561/5788/915/925/3932/695/6890/916/973/3718/29851/4261/100/6891/958/930/920
hsa04610	Complement and coagulation cascades	84	0.780989	2.3653	0.00135685	0.00747822	0.00539231	1258	tags=37%, list=6%, signal=35%	728/5329/716/11326/713/714/629/3689/718/712/1604/719/2151/5328/2153/3684/3075/715/5265/3078/1380/717/5627/3687/1675/5055/2162/5054/3080/3426/730
hsa05323	Rheumatoid arthritis	88	0.778634	2.36698	0.0013624	0.00747822	0.00539231	2003	tags=50%, list=10%, signal=45%	6364/3576/3606/10673/3117/6347/2920/6348/2921/3569/3113/942/6352/3122/3108/54/3689/1513/4050/2919/3127/6374/3383/7097/3123/7042/3115/3683/3112/3553/3111/245972/3600/3119/3126/10312/8600/4312/6387/3109/7099/941/1437/2353
hsa05321	Inflammatory bowel disease	63	0.769567	2.22887	0.00147275	0.00747822	0.00539231	1800	tags=43%, list=9%, signal=39%	3606/3117/3561/3569/3113/3122/3108/3127/64127/7097/3123/7042/3115/6775/3566/3112/6772/3553/3111/50615/7100/3119/3126/3586/3109/7099/6095
hsa04640	Hematopoietic cell lineage	95	0.766214	2.35046	0.00134771	0.00747822	0.00539231	2002	tags=53%, list=10%, signal=48%	3575/914/3117/909/911/915/3574/3569/3113/3122/3108/951/925/3673/931/1604/913/3127/917/3684/3123/3676/3115/945/916/1438/2209/3566/3112/1380/3553/3111/952/1436/929/3570/3119/4311/3126/290/924/3675/930/920/3559/966/3109/1378/1437/3554
hsa04620	Toll-like receptor signaling pathway	99	0.762858	2.33853	0.00133156	0.00747822	0.00539231	2003	tags=30%, list=10%, signal=27%	3576/6373/3627/23643/4283/6351/7096/6348/51311/3569/942/6352/1513/6696/7097/6772/3553/7100/929/5293/51284/51135/3663/3455/958/4615/5594/7099/941/2353
hsa04064	NF-kappa B signaling pathway	100	0.762283	2.34315	0.00132275	0.00747822	0.00539231	2203	tags=40%, list=11%, signal=36%	597/3576/5743/23643/10673/6363/2920/6351/6357/330/2921/4050/2919/3932/695/5328/3383/7412/7128/7188/5971/3553/4067/929/60401/598/51135/958/4615/8600/6387/23586/10892/5579/7099/1647/3554/6366/84433/5336
hsa05144	Malaria	47	0.761088	2.10298	0.00157729	0.00747822	0.00539231	1881	tags=51%, list=9%, signal=46%	3576/3606/6347/3569/3689/7058/4233/3383/7097/7057/7042/3820/3683/7412/1311/3553/2532/6401/6403/958/4615/3586/7099/1378
hsa04657	IL-17 signaling pathway	93	0.755712	2.31128	0.00135135	0.00747822	0.00539231	734	tags=22%, list=4%, signal=21%	6364/3934/3576/5743/3627/6279/6347/2920/2921/6280/3569/2919/8061/6374/4318/6354/7128/7188/6361/3553
hsa05134	Legionellosis	54	0.750175	2.12213	0.00151976	0.00747822	0.00539231	1881	tags=37%, list=9%, signal=34%	3576/3606/2920/2921/3569/3689/718/834/2919/7097/3684/3553/7100/929/3310/58484/4615/29108/7099/1378
hsa05133	Pertussis	73	0.741856	2.19528	0.00142653	0.00747822	0.00539231	1798	tags=34%, list=9%, signal=31%	3576/23643/716/713/3569/714/3689/718/834/712/3394/6374/3684/715/10392/3553/3659/717/929/51135/4615/5594/3586/29108/7099
hsa05320	Autoimmune thyroid disease	49	0.741233	2.06699	0.00156986	0.00747822	0.00539231	1930	tags=45%, list=9%, signal=41%	3117/3113/942/3122/3108/355/3127/3123/3002/3115/3112/3111/3134/3119/3126/3106/3135/958/3586/3107/3109/941
hsa05164	Influenza A	164	0.734775	2.39672	0.00122549	0.00747822	0.00539231	1889	tags=34%, list=9%, signal=31%	3576/3627/3606/3117/6347/56649/3569/3113/6352/3122/3108/834/64499/355/3127/91543/3383/5644/3123/3115/4938/5645/7177/4600/3112/6772/8743/90865/7113/3553/3111/4599/4939/5293/3119/51284/8797/3717/8795/3126/9021/5646/4261/4940/51135/3455/581/4615/5594/29108/23586/3109/637/5579/7099/64135
hsa04612	Antigen processing and presentation	72	0.72356	2.12634	0.00144509	0.00747822	0.00539231	1729	tags=38%, list=8%, signal=34%	3117/3821/3113/3122/3108/925/3127/1520/3123/972/10437/3115/6890/3823/3112/3111/3134/3119/3126/3310/4261/6891/3106/3135/920/3107/3109
hsa04062	Chemokine signaling pathway	186	0.720764	2.37341	0.00121655	0.00747822	0.00539231	1227	tags=27%, list=6%, signal=26%	10563/6364/6362/3576/6373/3627/4283/6347/6363/2920/6351/6355/6357/1230/3055/6348/2921/5880/6352/6375/2919/1236/729230/3702/114/6374/1234/2268/1794/9547/6367/653361/5473/5294/113/10663/6772/6354/6361/409/4067/6368/5293/1235/3718/58191/3717/7852/3579/53358/7409
hsa04060	Cytokine-cytokine receptor interaction	283	0.716515	2.45422	0.00114548	0.00747822	0.00539231	2453	tags=41%, list=12%, signal=36%	10563/6364/6362/3576/6373/3627/3575/3606/284340/4283/10673/6347/1439/6363/2920/6351/6355/6357/1230/3561/9173/6348/2921/3574/3569/6352/9235/9518/6375/3624/608/3560/9180/4050/2919/1236/85480/729230/355/3556/3557/6374/1234/7042/3587/9547/9966/6367/3976/5473/1438/3566/10663/6354/8743/90865/6361/3553/8744/1436/4982/3600/50615/6368/51554/3570/1235/60401/8794/58191/8797/7852/8795/55540/27242/3579/3601/1…
hsa04145	Phagosome	144	0.713576	2.2962	0.00126103	0.00747822	0.00539231	1358	tags=32%, list=7%, signal=30%	4688/4973/8685/2213/3117/4360/81035/2214/4689/3113/3122/3108/1536/3689/718/7058/3673/338382/3127/1520/64581/2212/7097/3684/7057/4481/3123/11151/3115/715/653361/6890/9103/2209/3112/1311/2215/3111/245972/929/3134/3119/3126/6891/3106/3135
hsa04659	Th17 cell differentiation	105	0.710809	2.18605	0.00132626	0.00747822	0.00539231	2886	tags=45%, list=14%, signal=39%	3117/3561/915/3569/3113/3122/3108/3560/3932/3556/3127/917/3123/919/3115/916/3566/3112/6772/3553/3111/50615/861/3570/3718/3119/3717/3126/196/4794/3662/920/5594/3559/3109/6095/3554/2353/3594/3572/3459/6776/3458/5534/2625/3716/9466
hsa04380	Osteoclast differentiation	126	0.709599	2.24446	0.00129366	0.00747822	0.00539231	2842	tags=40%, list=14%, signal=35%	4688/2213/2214/4689/7305/54/1513/3932/695/54209/8061/2212/7042/126014/653361/9103/2209/6772/2355/10859/2215/5971/3937/3553/6688/1436/4982/140885/11006/5293/10288/9021/11025/3455/9846/8600/5594/8651/11027/3554/2353/5468/5336/10379/3459/1435/55423/3458/5534/3726/3716
hsa05152	Tuberculosis	175	0.704409	2.30363	0.00124069	0.00747822	0.00539231	1881	tags=33%, list=9%, signal=30%	3606/2213/3117/7096/4360/2214/2207/3569/3113/3122/3108/3689/718/3127/64127/1520/64581/2212/7097/3684/3123/7042/972/3587/11151/3115/4046/9103/2209/3112/6772/2215/3553/3111/245972/3687/929/3119/8767/3717/3126/4261/51135/8877/3656/581/10312/4615/5594/3586/3109/7421/10892/637/7099/820/1378
hsa04650	Natural killer cell mediated cytotoxicity	124	0.702993	2.2125	0.00130719	0.00747822	0.00539231	2758	tags=37%, list=14%, signal=32%	2214/2207/3821/5880/7305/962/3689/4277/3932/355/3383/3002/919/3683/3823/10870/8743/2215/3937/5293/8797/8795/53358/7409/6452/3106/3135/3455/5594/3107/4068/637/5579/4893/1437/100507436/5336/3133/3459/5777/356/3824/3458/5534/5551/3105
hsa04668	TNF signaling pathway	112	0.699737	2.16607	0.00132802	0.00747822	0.00539231	2003	tags=30%, list=10%, signal=28%	6364/5743/3627/6347/2920/330/2921/3569/6352/2919/355/64127/6374/3383/4318/7412/3976/7128/9586/7188/3553/3659/3600/6401/5293/9021/7133/4217/602/5594/1437/4323/90993/2353
hsa05145	Toxoplasmosis	108	0.696482	2.14681	0.00133511	0.00747822	0.00539231	1798	tags=33%, list=9%, signal=31%	23643/240/3117/330/3113/3122/3108/3914/3127/1234/3949/7097/3123/7042/3587/3115/5294/3112/6772/3111/284217/3119/598/3717/3126/3310/4261/3918/51135/958/4615/5594/3586/8651/3109/7099
hsa04658	Th1 and Th2 cell differentiation	90	0.688951	2.09271	0.00137174	0.00747822	0.00539231	1729	tags=33%, list=8%, signal=31%	3117/3561/915/3113/3122/3108/3560/3932/3127/917/3123/919/3115/916/6775/3566/3112/6772/3111/864/3718/3119/3717/3126/4794/920/5594/3559/4853/3109
hsa04623	Cytosolic DNA-sensing pathway	59	0.684599	1.96801	0.00145773	0.00747822	0.00539231	734	tags=15%, list=4%, signal=15%	3627/3606/6351/3569/6352/834/9447/90865/3553
hsa05143	African trypanosomiasis	35	0.669721	1.75791	0.00166945	0.00747822	0.00539231	1796	tags=37%, list=9%, signal=34%	3606/3569/355/3383/8542/7412/3620/3553/6401/2150/4615/3586/5579
hsa04621	NOD-like receptor signaling pathway	170	0.666777	2.17544	0.00122699	0.00747822	0.00539231	2111	tags=28%, list=10%, signal=25%	3576/3606/6347/2920/330/2921/5027/3569/6352/1536/834/2919/2634/64127/10135/115362/4938/10392/6772/9447/7128/7188/114769/3553/4939/8767/598/1667/3428/2635/4940/51135/58484/3455/51393/84674/4615/5594/7295/29108/55669/7099/837/820/115361/838/9051
hsa05169	Epstein-Barr virus infection	197	0.663656	2.19746	0.00120337	0.00747822	0.00539231	1815	tags=29%, list=9%, signal=27%	3627/3117/915/3569/3113/3122/8900/3108/695/355/3127/917/3383/7097/3123/919/4609/3115/4938/3683/9134/6890/916/965/3112/6772/7128/1380/7188/5971/3111/4067/864/4939/9636/3134/5293/3718/3119/1026/1643/3126/4940/51135/4794/6891/3106/3135/3455/958/581/930/4615/3107/23586/3109/637/1647
hsa04514	Cell adhesion molecules	141	0.656595	2.10578	0.00126103	0.00747822	0.00539231	2389	tags=40%, list=12%, signal=35%	914/3117/1462/79679/5788/9071/3113/942/10686/3122/3108/3689/29126/925/3127/3383/3684/3123/9076/3676/3115/3683/7412/965/6402/3112/3111/6614/6401/201633/3134/3119/6404/57689/3126/6403/29851/1001/3696/3106/3135/958/1002/920/3107/3109/214/5010/941/152404/3695/84628/6385/9080/923/3133
hsa05171	Coronavirus disease - COVID-19	217	0.649918	2.16659	0.0011919	0.00747822	0.00539231	2328	tags=25%, list=11%, signal=22%	3576/3627/6347/728/716/51311/713/3569/714/629/1536/718/834/712/719/2212/7097/4938/715/4600/1839/6772/7113/3553/717/1675/4599/4939/9636/3570/5293/51284/2162/6403/200916/4940/51135/730/3455/4615/5594/4312/51065/23586/5579/7099/64135/1437/2353/5336/3572/729/10379/114548
hsa05166	Human T-cell leukemia virus 1 infection	216	0.641438	2.13458	0.00120192	0.00747822	0.00539231	2455	tags=32%, list=12%, signal=28%	4316/3117/3561/915/3569/3113/3122/8900/3108/3560/3689/3932/8061/114/3127/1030/917/3383/3123/7042/4609/3115/3683/9134/916/113/3112/9586/4085/5971/6688/3111/11200/3600/3134/5293/3718/3119/1026/598/3126/3601/3106/1029/4214/3135/958/581/7538/920/5594/3107/3559/706/3109/1111/4893/1437/90993/3554/2353/1869/7850/292/1017/3133/9133/6776/890
hsa05146	Amoebiasis	101	0.632039	1.94298	0.001321	0.00747822	0.00539231	2076	tags=31%, list=10%, signal=28%	3576/2920/909/911/2921/3569/3914/3689/2919/2335/338382/913/7097/3684/7042/2769/3553/284217/929/5293/1277/3918/1281/3586/5272/5579/7099/1285/1437/3554/1286
hsa00590	Arachidonic acid metabolism	57	0.63197	1.80584	0.0014881	0.00747822	0.00539231	1426	tags=19%, list=7%, signal=18%	5743/240/27306/5321/5320/247/5742/5740/8399/5730/6916
hsa04115	p53 signaling pathway	73	0.630585	1.86601	0.00142653	0.00747822	0.00539231	2918	tags=45%, list=14%, signal=39%	5366/2810/355/7057/9134/11200/6241/1026/598/8797/1643/5054/8795/64065/64393/983/3479/1029/581/5268/83667/27113/143686/637/1111/1647/55240/1017/9133/50484/4193/8493/55367
hsa05142	Chagas disease	100	0.627176	1.92785	0.00132275	0.00747822	0.00539231	1576	tags=24%, list=8%, signal=22%	3576/6347/6348/915/713/3569/6352/714/718/712/355/917/7097/7042/919/916/2769/3553/5293/5054/51135/4615/5594/3586
hsa04913	Ovarian steroidogenesis	48	0.622635	1.7229	0.00158228	0.00747822	0.00539231	578	tags=15%, list=3%, signal=14%	5743/240/5321/114/3949/1545/113
hsa05219	Bladder cancer	41	0.614021	1.66139	0.00646204	0.0251558	0.0181391	3198	tags=41%, list=16%, signal=35%	3576/7057/4318/4609/1839/1890/1026/1029/5594/4312/4893/4313/1869/23604/4193/5604/1956
hsa05162	Measles	135	0.610385	1.95244	0.00126582	0.00747822	0.00539231	2706	tags=30%, list=13%, signal=27%	2213/3561/915/3569/3560/355/917/7097/4938/9134/4600/916/6772/7128/3553/4599/4939/5293/3718/51284/598/3310/4940/51135/3455/581/4615/27113/3559/23586/637/7099/64135/2353/1017/10379/6776/6504/356/4179/9367
hsa04664	Fc epsilon RI signaling pathway	65	0.609977	1.7732	0.00147493	0.00747822	0.00539231	2981	tags=31%, list=15%, signal=26%	240/2207/5880/5321/241/695/2205/3937/4067/5293/7409/9846/5594/4893/1437/5336/8605/2206/3635/5604
hsa04662	B cell receptor signaling pathway	80	0.607742	1.82488	0.00138889	0.00747822	0.00539231	3300	tags=42%, list=16%, signal=36%	2213/5880/695/1380/10859/973/4067/11006/5293/971/10288/118788/27071/7409/4794/11025/930/5594/10892/5579/11027/4893/2353/84433/5336/5777/5534/974/3635/5604/10990/8519/23547/5290
hsa04216	Ferroptosis	40	0.603078	1.62836	0.0113269	0.0416167	0.0300085	2936	tags=32%, list=14%, signal=28%	3162/1356/1536/51703/64116/55240/23657/81631/5621/2512/30061/7018/9474
hsa05235	PD-L1 expression and PD-1 checkpoint pathway in cancer	88	0.594527	1.80732	0.0013624	0.00747822	0.00539231	3566	tags=39%, list=18%, signal=32%	10125/915/29126/3932/917/7097/919/916/6772/5293/55509/3717/10538/116071/4794/920/4615/5594/7099/4893/27436/2353/3459/5777/3458/5534/3716/5604/1956/3460/5290/940/5603/148022
hsa03030	DNA replication	36	0.581594	1.52844	0.0264463	0.0919993	0.0663378	2938	tags=39%, list=14%, signal=33%	5427/4174/4173/5983/5557/4175/5984/5111/2237/6119/5558/23649/4171/5426
hsa05120	Epithelial cell signaling in Helicobacter pylori infection	70	0.579554	1.70039	0.00143885	0.00747822	0.00539231	1055	tags=16%, list=5%, signal=15%	3576/2920/2921/6352/2919/4233/1839/10392/245972/4067/3579
hsa04666	Fc gamma R-mediated phagocytosis	94	0.576741	1.76671	0.0013459	0.00747822	0.00539231	2981	tags=37%, list=15%, signal=32%	2213/3055/5788/2214/5880/5321/2212/653361/2209/2215/8612/4067/5293/7409/85477/8877/9846/5594/2934/5579/10095/8853/7408/5336/8395/8936/7454/10097/8605/10092/3635/998/50807/382/5604
hsa00604	Glycosphingolipid biosynthesis - ganglio series	15	0.576134	1.307	0.175373	0.359276	0.259063	896	tags=13%, list=4%, signal=13%	81849/6489
hsa04670	Leukocyte transendothelial migration	109	0.572008	1.76997	0.0013245	0.00747822	0.00539231	2237	tags=27%, list=11%, signal=24%	4688/9071/4689/5880/10686/1536/3689/3702/3383/3684/4318/9076/3676/3683/7412/653361/399/5293/7852/7294/7409/6387/5579/5010/83593/4313/7408/5336/9080
hsa05167	Kaposi sarcoma-associated herpesvirus infection	190	0.564529	1.86745	0.00120627	0.00747822	0.00539231	2393	tags=24%, list=12%, signal=22%	3576/5743/2920/1230/3055/2921/3569/942/9976/718/2919/4277/355/1234/3383/2247/4609/5294/6772/4067/3134/5293/1026/3717/3106/3135/3455/581/7538/5594/3107/637/131450/4893/1437/100507436/2353/59345/23533/146850/5336/1869/3572/10379/3133/3459
hsa00592	alpha-Linolenic acid metabolism	22	0.56206	1.35865	0.107143	0.274234	0.197741	4488	tags=41%, list=22%, signal=32%	5321/5320/8399/8605/26279/30814/9415/8398/5322
hsa04210	Apoptosis	134	0.561998	1.79075	0.00128041	0.00747822	0.00539231	2003	tags=21%, list=10%, signal=19%	597/5366/1439/330/1513/4914/1075/355/1520/8739/3002/8743/1512/4001/5293/598/8797/1522/8795/581/4217/5594/27113/637/1647/4893/7277/2353
hsa04625	C-type lectin receptor signaling pathway	102	0.559099	1.72514	0.00131062	0.00747822	0.00539231	3791	tags=35%, list=19%, signal=29%	5743/2207/3569/834/64581/6367/4046/6772/5971/6361/3553/3659/5293/602/5594/3586/29108/10892/4893/22800/5336/10379/114548/4193/22808/5534/3710/6237/91860/5290/51561/5603/3558/1263/6773/5580
hsa05202	Transcriptional misregulation in cancer	170	0.556926	1.81704	0.00122699	0.00747822	0.00539231	2739	tags=34%, list=13%, signal=29%	597/3576/8842/330/3569/942/8900/3560/4914/5328/4233/3684/3248/4318/3002/4609/8013/26471/2209/7113/6688/1436/861/929/1026/598/1667/1643/64332/51513/64919/2115/9915/3479/5966/2530/958/860/581/1991/1848/5154/8091/5079/1647/1437/3695/6495/5468/2120/7850/890/2313/55589/4193/5218/4149
hsa04630	JAK-STAT signaling pathway	160	0.556809	1.81044	0.00124224	0.00747822	0.00539231	2624	tags=31%, list=13%, signal=27%	3575/1439/3561/3574/3569/3560/9180/85480/3587/4609/3976/1438/6775/3566/6772/3600/50615/3570/5293/3718/1026/598/3717/1154/3601/9021/3952/5292/64109/3455/3586/8651/5154/3559/5008/8027/1437/5156/338376/116379/3594/3953/3572/10379/3459/6776/3597/5777/1489/3458
hsa05135	Yersinia infection	135	0.555568	1.7771	0.00126582	0.00747822	0.00539231	2981	tags=27%, list=15%, signal=24%	3576/3606/6347/2533/3569/5880/834/925/2335/3932/2212/3676/3937/3553/5293/7409/51135/58484/7456/920/4615/5594/3586/29108/7099/10095/8935/2353/8395/114548/7454/10097/3688/10092/998/382/5604
hsa00670	One carbon pool by folate	19	0.55506	1.29928	0.165756	0.352019	0.25383	3428	tags=26%, list=17%, signal=22%	10797/7298/441024/471/6472
hsa04660	T cell receptor signaling pathway	101	0.553008	1.70003	0.001321	0.00747822	0.00539231	3466	tags=33%, list=17%, signal=27%	10125/5788/915/925/3932/3702/917/919/916/3937/5293/29851/7409/4794/920/5594/3586/10892/4893/1437/2353/84433/5777/3458/5062/5534/998/5604/1493/5290/5063/940/5603
hsa00601	Glycosphingolipid biosynthesis - lacto and neolacto series	27	0.549074	1.37438	0.0958188	0.261533	0.188583	2043	tags=33%, list=10%, signal=30%	10331/6489/8706/2524/2525/84002/10402/10678/2683
hsa05130	Pathogenic Escherichia coli infection	189	0.542591	1.7937	0.00120773	0.00747822	0.00539231	2961	tags=27%, list=15%, signal=23%	3576/3606/9071/3569/10686/64005/834/3071/355/2212/4542/9076/1902/3059/8743/3553/7100/8797/8795/4643/51135/581/7456/4646/4615/5594/29108/57121/4628/7099/837/10095/5010/7277/3554/2353/4644/9080/8936/114548/55930/5777/10097/356/5062/3688/10092/10006/998/382/27128
hsa04217	Necroptosis	127	0.541684	1.71552	0.001287	0.00747822	0.00539231	2842	tags=28%, list=14%, signal=25%	330/5321/1536/834/355/6775/6772/8743/7128/90865/7188/3553/5836/3718/8797/3717/8795/2747/3455/581/2746/29108/637/7099/197259/292/10379/114548/3459/6776/356/10616/3458/8605/2512/3716
hsa05163	Human cytomegalovirus infection	219	0.540834	1.80517	0.00118483	0.00747822	0.00539231	2018	tags=20%, list=10%, signal=18%	3576/5743/6347/6351/1230/6348/3569/5880/6352/355/114/1234/3587/4609/6890/113/9586/1978/7188/5734/3553/3570/3134/5293/1026/7852/3579/6891/3106/1029/3135/581/5732/5594/6387/3107/637/5579/4893/5156/90993/3554/59345
hsa05222	Small cell lung cancer	92	0.538153	1.64702	0.00403226	0.0160799	0.0115947	2739	tags=28%, list=13%, signal=25%	5743/330/3914/2335/3673/1030/4609/9134/7188/1164/284217/5293/1026/598/1643/3918/3675/581/1647/1285/1286/1869/1017/1163/3688/4149
hsa05203	Viral carcinogenesis	162	0.537817	1.7503	0.00123457	0.00747822	0.00539231	2895	tags=28%, list=14%, signal=24%	5366/8900/718/1234/1030/9134/9586/7188/245972/4067/3134/5293/3718/1026/983/85477/3106/1029/5966/3135/581/3249/5594/3107/2934/1111/9734/4893/7533/90993/6672/3572/1017/10379/3133/2959/6776/890/5922/4193/5933/3105/3716/998/7185
hsa00920	Sulfur metabolism	10	0.537156	1.10027	0.373585	0.570852	0.411623	2928	tags=50%, list=14%, signal=43%	23474/7263/4357/58472/9060
hsa05161	Hepatitis B	161	0.525938	1.71176	0.00123457	0.00747822	0.00539231	2572	tags=22%, list=13%, signal=20%	3576/3569/8900/355/7097/4318/7042/4609/9134/6775/6772/9586/5293/3718/1026/3717/1643/51135/4214/581/4615/5594/23586/5111/637/5579/7099/4893/64135/90993/2353/1869/1017/6776/890/356
hsa04110	Cell cycle	123	0.521989	1.6386	0.00131406	0.00747822	0.00539231	3432	tags=32%, list=17%, signal=27%	8900/2810/1030/7042/4609/9134/4085/8317/11200/1026/4174/4173/983/10459/1029/9978/4175/994/990/10926/5111/1022/1111/1647/7533/1869/8318/1017/699/9133/890/4193/5933/4171/5001/898/23594/4088/8379
hsa04142	Lysosome	128	0.519818	1.64723	0.001287	0.00747822	0.00539231	2192	tags=22%, list=11%, signal=20%	27074/1510/54/1513/1075/968/9476/1520/7805/8905/245972/4864/1512/1522/2760/3988/6556/10312/4668/57192/1200/4125/5476/58511/410/3423/1515/130340
hsa04933	AGE-RAGE signaling pathway in diabetic complications	100	0.514497	1.58149	0.00396825	0.01602	0.0115515	2467	tags=30%, list=12%, signal=26%	3576/6347/3569/1536/2335/3383/7042/50507/7412/6772/3553/6401/5293/3717/5054/113026/1277/5292/581/1281/5333/5594/5579/4893/1285/1286/4313/5336/6776/1906
hsa00591	Linoleic acid metabolism	26	0.514098	1.27967	0.172174	0.356335	0.256942	4488	tags=35%, list=22%, signal=27%	5321/5320/8399/8605/26279/30814/1571/8398/5322
hsa05221	Acute myeloid leukemia	67	0.509784	1.48794	0.0218023	0.0766598	0.055277	2455	tags=28%, list=12%, signal=25%	597/8900/3684/4609/2209/1978/6688/1436/861/929/5293/5292/1848/5594/4893/1437/11040/6776/890
hsa04611	Platelet activation	122	0.508338	1.59289	0.00132626	0.00747822	0.00539231	2203	tags=20%, list=11%, signal=18%	10125/2207/5321/3673/695/114/2212/64805/83706/5294/113/3937/4067/5742/5293/54518/1277/1281/6916/5594/23533/7408/146850/5336
hsa05160	Hepatitis C	151	0.507464	1.63726	0.00250313	0.0106302	0.00766508	2624	tags=22%, list=13%, signal=19%	3627/9071/10686/355/3949/91543/9076/4609/4938/4600/6772/3434/4599/4939/5293/1026/9021/4940/3455/581/5594/23586/637/4893/7533/5010/9080/1869/1017/10379/5465/356/3458
hsa01523	Antifolate resistance	30	0.503492	1.28658	0.135043	0.31769	0.229077	1890	tags=23%, list=9%, signal=21%	3569/7298/3553/8836/2350/10257/8714
hsa00603	Glycosphingolipid biosynthesis - globo and isoglobo series	14	0.497161	1.09974	0.370937	0.570852	0.411623	2323	tags=36%, list=11%, signal=32%	6489/8706/2524/4668/26301
hsa00760	Nicotinate and nicotinamide metabolism	34	0.491983	1.29146	0.133443	0.316202	0.228004	1510	tags=21%, list=7%, signal=19%	4837/10135/4860/952/4907/683/23057
hsa05170	Human immunodeficiency virus 1 infection	206	0.490505	1.62795	0.00121065	0.00747822	0.00539231	2801	tags=26%, list=14%, signal=22%	915/5880/355/1234/200315/917/7097/919/6890/916/9582/684/8905/7188/25939/3134/5293/27350/598/7852/60489/983/51135/6891/3106/7133/3135/581/9978/920/4615/5594/3107/637/5579/1111/7099/4893/2353/59345/8450/130340/5336/3133/9133/356/55970/5062/5534/200316/567/3105/3710
hsa04218	Cellular senescence	156	0.490226	1.58965	0.00249066	0.0106302	0.00766508	3649	tags=31%, list=18%, signal=25%	3576/3569/8900/1030/7042/4609/9134/1978/11200/3134/5293/1026/5054/983/3106/1029/3135/5594/3107/1111/1647/4893/83593/22800/1869/292/1017/3133/9133/890/4193/22808/5534/5933/3105/3710/90550/6237/5604/4605/898/4683/91860/5290/4088/5603/23291/2113
hsa04215	Apoptosis - multiple species	31	0.489771	1.26311	0.159129	0.346901	0.25014	1755	tags=19%, list=9%, signal=18%	5366/330/598/581/27113/637
hsa00531	Glycosaminoglycan degradation	19	0.489194	1.1451	0.29326	0.504732	0.363946	3549	tags=21%, list=17%, signal=17%	10855/3423/3074/3373
hsa04750	Inflammatory mediator regulation of TRP channels	96	0.488974	1.49706	0.0162162	0.0582715	0.0420177	2203	tags=19%, list=11%, signal=17%	5321/4914/3269/3357/114/3556/5029/113/5734/3553/5293/2150/3479/51393/5732/5579/3554/5336
hsa04622	RIG-I-like receptor signaling pathway	68	0.483492	1.41572	0.0462428	0.14681	0.10586	2936	tags=15%, list=14%, signal=13%	3576/3627/9636/4214/23586/64135/338376/54941/79132/9474
hsa04370	VEGF signaling pathway	57	0.483336	1.38112	0.0684524	0.20349	0.14673	3466	tags=30%, list=17%, signal=25%	5743/5880/5321/5293/8877/7867/5594/5579/4893/5336/8605/5534/998/5604/9047/5290/5603
hsa00860	Porphyrin and chlorophyll metabolism	32	0.482023	1.25044	0.166945	0.3522	0.25396	118	tags=6%, list=1%, signal=6%	3162/1356
hsa00240	Pyrimidine metabolism	53	0.474564	1.34083	0.100763	0.267883	0.193162	1622	tags=21%, list=8%, signal=19%	7378/7298/4860/6241/1890/4907/129607/1633/7083/1806/1503
hsa04923	Regulation of lipolysis in adipocytes	55	0.471801	1.34029	0.0983359	0.265751	0.191624	1085	tags=16%, list=5%, signal=16%	5743/154/114/113/4852/5742/5293/11343/8660
hsa00830	Retinol metabolism	53	0.466374	1.31769	0.117557	0.286875	0.206856	237	tags=8%, list=1%, signal=7%	195814/10170/29785/220
hsa04512	ECM-receptor interaction	88	0.464628	1.41243	0.0435967	0.142561	0.102796	2182	tags=27%, list=11%, signal=24%	3371/3694/3914/7058/2335/3673/6696/7057/3676/1311/284217/3161/1277/3918/3696/3675/3691/5649/80144/1758/1285/1286/3695/6385
hsa04810	Regulation of actin cytoskeleton	216	0.46339	1.54207	0.00120192	0.00747822	0.00539231	3522	tags=29%, list=17%, signal=24%	3694/5880/3689/2335/3673/3071/2247/3684/3676/1902/3683/3687/56034/5293/7852/7409/85477/3696/3675/5305/3691/5594/8826/6387/5154/2934/57121/7074/4628/10095/4893/5156/22800/3695/9087/8395/8936/2252/8822/3682/9459/7114/10097/8817/55970/5062/2245/22808/3688/10092/998/6237/5604/1956/5290/87/22801/5063/2255/10672/10552/81624
hsa05205	Proteoglycans in cancer	201	0.463123	1.53292	0.00121065	0.00747822	0.00539231	3352	tags=29%, list=16%, signal=25%	5329/10855/2335/3673/4060/355/5328/4233/7097/2247/7057/4318/7042/4609/1839/3059/1634/5293/1026/3316/2065/1277/7409/3479/2316/858/857/5594/8826/7074/7477/5579/7099/4893/22800/4313/6385/5336/3082/5777/356/2099/4193/22808/3688/3710/8326/998/6382/7472/6237/5604/1278/7476/1956/817/8323/5290/3549
hsa01521	EGFR tyrosine kinase inhibitor resistance	78	0.461031	1.37324	0.0515759	0.159107	0.114727	3300	tags=35%, list=16%, signal=29%	3569/4233/2247/1978/56034/3570/5293/598/3717/2065/53358/3479/581/5594/5154/5579/4893/2621/5156/5336/3082/7039/3716/558/5604/1956/5290
hsa05206	MicroRNAs in cancer	165	0.457674	1.49085	0.0036855	0.0150645	0.0108625	2344	tags=24%, list=12%, signal=22%	5743/3162/3371/5328/4233/1545/7057/4318/7042/4609/4325/9134/2146/5293/1026/2744/2065/8660/5292/1029/10253/406988/5268/27165/994/5594/8651/8626/5154/8091/4853/5579/407040/4893/5156/9839/5336/1591/1869/406886
hsa00520	Amino sugar and nucleotide sugar metabolism	48	0.45194	1.25057	0.153481	0.339171	0.244566	2324	tags=21%, list=11%, signal=18%	1118/3101/80896/51167/5973/51005/5372/91373/9945/5373
hsa05218	Melanoma	72	0.449158	1.31995	0.0809249	0.231063	0.166612	3480	tags=33%, list=17%, signal=28%	4233/2247/56034/5293/1026/1643/3479/1029/581/5594/5154/1647/4893/5156/1869/2252/3082/8822/8817/4193/5604/1956/5290/2255
hsa00790	Folate biosynthesis	26	0.446572	1.11158	0.333913	0.554388	0.399752	2268	tags=27%, list=11%, signal=24%	7166/2643/55034/8836/231/5805/10243
hsa00380	Tryptophan metabolism	42	0.446509	1.21812	0.191759	0.380032	0.274029	731	tags=17%, list=4%, signal=16%	8564/8942/1545/6999/7166/3620/259307
hsa05132	Salmonella infection	245	0.445292	1.49844	0.00117786	0.00747822	0.00539231	2983	tags=23%, list=15%, signal=20%	3576/23643/3606/330/5788/3569/834/3071/338382/113146/7097/6281/4609/5294/10392/8743/3553/399/7100/929/5293/8767/8797/8795/51135/58484/581/2316/4646/4615/5594/7295/29108/7099/837/10095/302/7277/2353/838/197259/3839/147700/114548/29109/55207/10097/26263/9367/10092/10006/998/382/27128/6237/5604/1781
hsa05204	Chemical carcinogenesis	68	0.443153	1.2976	0.108382	0.274234	0.197741	390	tags=6%, list=2%, signal=6%	5743/27306/3290/1545
hsa00533	Glycosaminoglycan biosynthesis - keratan sulfate	14	0.441316	0.976209	0.487572	0.675576	0.487137	3139	tags=36%, list=15%, signal=30%	9435/2530/10678/2683/8534
hsa00120	Primary bile acid biosynthesis	17	0.440683	1.01081	0.468165	0.672045	0.484591	3578	tags=35%, list=18%, signal=29%	9023/1593/51302/80270/10998/10005
hsa05230	Central carbon metabolism in cancer	69	0.43828	1.28182	0.115942	0.286875	0.206856	2128	tags=23%, list=10%, signal=21%	4914/9123/8140/4233/3101/4609/57103/5293/6510/2744/9997/27165/5594/4893/5156/5163
hsa05210	Colorectal cancer	86	0.43812	1.32924	0.0761905	0.22048	0.158982	2003	tags=17%, list=10%, signal=16%	5366/5880/2069/374/7042/4609/5293/1026/1643/581/5594/27113/1647/4893/2353
hsa04151	PI3K-Akt signaling pathway	348	0.437914	1.52075	0.00111857	0.00747822	0.00539231	2877	tags=25%, list=14%, signal=22%	3575/3561/3371/3574/3694/3569/3914/3560/4914/7058/9180/2335/2069/3673/6696/374/4233/7097/2247/7057/3676/4609/1902/9134/5294/3566/1311/9586/1978/284217/1436/56034/3570/5293/3718/1026/598/3717/4602/2065/1277/118788/3918/4515/3479/3696/3455/3675/930/1969/3691/5649/5594/5154/3559/57121/5008/7099/4893/7533/1285/5156/90993/8115/59345/1286/23533/3695/146850/1017/2252/23566/3082/1435/2323/8822/356/8817/5…
hsa04392	Hippo signaling pathway - multiple species	28	0.436549	1.10775	0.342466	0.554388	0.399752	2259	tags=25%, list=11%, signal=22%	122786/9770/126374/7003/55233/4771/166824
hsa05220	Chronic myeloid leukemia	76	0.435709	1.29458	0.0997151	0.267269	0.192719	3420	tags=26%, list=17%, signal=22%	7042/4609/861/5293/1026/598/1643/53358/1029/581/9846/5594/1647/4893/1869/6776/4193/5604/5290/4088
hsa04917	Prolactin signaling pathway	70	0.435213	1.2769	0.123741	0.299728	0.216125	3466	tags=27%, list=17%, signal=23%	6772/3659/5293/3717/1154/9021/53358/2001/8600/5594/8651/4893/2353/6776/2099/5604/8835/5290/5603
hsa05212	Pancreatic cancer	76	0.430823	1.28006	0.112536	0.28091	0.202555	3420	tags=30%, list=17%, signal=25%	5880/7042/6772/5293/1026/598/1643/675/1029/581/5594/1647/1869/9459/7039/3716/998/5604/1956/5888/5290/5900/4088
hsa05200	Pathways in cancer	525	0.427748	1.51712	0.0010627	0.00747822	0.00539231	2695	tags=22%, list=13%, signal=19%	10125/3576/5743/3575/5366/1439/330/3162/3561/3574/3569/5880/8900/3914/3560/4914/2335/3673/355/114/1030/4233/2247/4318/7042/4609/1902/9134/1438/113/6775/3566/6772/7188/1164/5734/6688/112399/284217/1436/3600/861/3570/5293/3718/1026/598/3717/7852/1643/675/3601/5292/3918/9915/3479/1029/3455/3675/581/9978/5732/5594/27113/4312/6387/5154/3559/57121/4853/7477/637/5579/1647/4893/1285/2940/650/27436/5156/8…
hsa00980	Metabolism of xenobiotics by cytochrome P450	62	0.426928	1.23549	0.153509	0.339171	0.244566	2651	tags=18%, list=13%, signal=15%	27306/3290/29785/1545/27294/221/2940/874/125/9446/124
hsa00770	Pantothenate and CoA biosynthesis	21	0.425026	1.01747	0.448214	0.657247	0.47392	1604	tags=19%, list=8%, signal=18%	586/8876/8875/1806
hsa04970	Salivary secretion	85	0.424801	1.28361	0.107776	0.274234	0.197741	1859	tags=16%, list=9%, signal=15%	4069/3783/1470/154/114/113/952/1472/1469/683/5542/5579/820/3778
hsa04010	MAPK signaling pathway	290	0.419581	1.44005	0.0022805	0.00994299	0.00716958	3080	tags=26%, list=15%, signal=22%	10125/1847/5880/5321/4914/2069/355/3556/374/4233/2247/7042/1844/4609/1846/11184/5971/3553/409/1436/56034/929/11221/2065/3310/5923/51135/3479/4214/7867/5921/2316/4217/1969/1848/994/4615/5594/5154/5579/1843/1647/8569/5778/4893/5156/3554/2353/93589/22800/2252/9064/3082/1435/1850/5922/2323/8822/356/8817/55970/5062/8605/22808/5534/7039/4149/3164/998/779/6237/5604/27092/8550
hsa01524	Platinum drug resistance	70	0.417394	1.22462	0.168345	0.352878	0.254449	1918	tags=20%, list=9%, signal=18%	5366/330/355/5293/1026/598/1029/581/4217/5594/27113/637/2940/7153
hsa03440	Homologous recombination	41	0.417351	1.12925	0.289176	0.502982	0.362684	3441	tags=32%, list=17%, signal=26%	675/83990/84142/5932/6119/25788/5890/641/580/4683/5888/5889/11073
hsa00565	Ether lipid metabolism	44	0.416194	1.14016	0.28278	0.497146	0.358477	2769	tags=23%, list=14%, signal=20%	5321/5320/8612/5168/8399/7941/133121/56994/8605/26279
hsa03320	PPAR signaling pathway	74	0.416193	1.2297	0.175793	0.359276	0.259063	1612	tags=16%, list=8%, signal=15%	4973/28965/2170/6319/2171/51703/1593/10873/9370/5360/33/4312
hsa04972	Pancreatic secretion	95	0.41147	1.26224	0.126685	0.304602	0.219639	1223	tags=13%, list=6%, signal=12%	5874/1359/114/5644/5320/5645/9635/113/952/8399/5646/683
hsa05418	Fluid shear stress and atherosclerosis	135	0.41006	1.31166	0.0607595	0.183966	0.132652	2624	tags=19%, list=13%, signal=17%	4688/6347/3162/5880/3383/4318/7412/653361/3553/6401/5293/4217/858/857/7295/5154/1843/2940/3554/2353/4313/6385/7850/1906/9446/3458
hsa04530	Tight junction	163	0.409286	1.33219	0.044335	0.14354	0.103502	3514	tags=25%, list=17%, signal=21%	909/911/9071/10686/913/9076/3059/861/51762/4214/4217/8531/154810/7074/154796/4628/5111/10095/91862/5010/7277/7408/9080/4771/92359/7454/51422/10097/3688/10092/998/51735/55114/123720/910/87/7846/10552/2017/5562/79778
hsa05410	Hypertrophic cardiomyopathy	90	0.406073	1.23346	0.141289	0.323088	0.232969	3029	tags=24%, list=15%, signal=21%	3694/3569/3673/7042/3676/284217/6444/3479/3696/7171/3675/3691/93589/3695/1906/51422/4607/3688/6546/779/7134/27092
hsa04066	HIF-1 signaling pathway	107	0.40592	1.25342	0.128647	0.307063	0.221414	3300	tags=29%, list=16%, signal=24%	3162/3569/1536/3101/1978/112399/3570/5293/1026/5054/3479/5209/9978/5594/7076/5579/7099/8569/5163/5336/3459/1906/2023/3458/7018/5604/1956/817/6513/3460/5290
hsa05216	Thyroid cancer	37	0.405635	1.07672	0.361111	0.567708	0.409357	3321	tags=32%, list=16%, signal=27%	4914/4609/1026/1643/581/5594/1647/4893/5468/5604/8030/5979
hsa04350	TGF-beta signaling pathway	91	0.405529	1.23784	0.138024	0.320099	0.230813	2702	tags=22%, list=13%, signal=19%	26585/3624/1030/4681/7057/7042/4609/4052/7044/1634/9978/5594/10468/64388/650/7050/653/3458/5933/57154
hsa04510	Focal adhesion	200	0.399261	1.32104	0.0374849	0.126367	0.091119	2153	tags=20%, list=11%, signal=18%	330/3371/3694/5880/3914/7058/2335/3673/6696/4233/7057/3676/1311/284217/56034/5293/5923/53358/1277/3918/64098/7409/3479/3696/3675/2316/858/3691/5649/857/5594/5154/5579/1285/5156/1286/3695/7791/7408
hsa05100	Bacterial invasion of epithelial cells	77	0.398752	1.1887	0.205674	0.402726	0.290393	5494	tags=44%, list=27%, signal=32%	2335/4233/3059/5293/53358/10459/858/55752/857/10095/8936/26052/10097/3688/10092/998/5290/10552/2017/391/10094/653857/79658/5295/10801/8976/10109/1499/1759/1793/867/10096/10093/10163
hsa04928	Parathyroid hormone synthesis, secretion and action	105	0.395543	1.21647	0.165782	0.352019	0.25383	2981	tags=24%, list=15%, signal=20%	10568/4929/114/4325/113/1839/9586/409/1026/9365/860/8600/5594/7421/5579/4323/90993/2353/1591/5741/3710/2625/5142/4322/5604
hsa00480	Glutathione metabolism	52	0.391736	1.1031	0.339506	0.554388	0.399752	3141	tags=29%, list=15%, signal=24%	27306/79017/6241/290/2940/494143/26873/3417/9446/50484/51056/124975/2876/2678/79094
hsa04080	Neuroactive ligand-receptor interaction	334	0.390706	1.35398	0.0100559	0.0376295	0.0271334	1763	tags=13%, list=9%, signal=12%	3001/728/6019/2359/5027/718/154/3269/3357/719/2151/53829/5029/57105/5644/2561/2743/5645/1902/5724/4922/150/2357/5734/4852/5031/7068/10874/2150/27334/6863/5646/3952/5026/5367/10886/140/5732/136/133/706/6013
hsa04974	Protein digestion and absorption	96	0.387031	1.18495	0.202703	0.3993	0.287923	2191	tags=23%, list=11%, signal=21%	3783/1301/1359/1296/1300/5644/1803/5645/9056/6510/4311/5646/1277/1295/1290/1281/1294/1285/2006/54407/1286/1289
hsa01040	Biosynthesis of unsaturated fatty acids	25	0.386113	0.965456	0.484429	0.675576	0.487137	2054	tags=24%, list=10%, signal=22%	6319/9200/79993/401494/11332/201562
hsa05131	Shigellosis	225	0.385316	1.29085	0.0505288	0.157361	0.113468	2968	tags=22%, list=15%, signal=19%	3576/3606/6352/718/834/3101/10392/3059/7188/3553/7100/929/5293/8767/598/113026/58484/581/5333/9978/55752/4615/5594/831/29108/10892/7099/837/10095/1437/58528/3554/5336/8936/7321/114548/10097/10616/4193/3688/23048/10092/64121/664/3710/998/382/9474/27128/55062
hsa03420	Nucleotide excision repair	43	0.384498	1.05178	0.379365	0.57672	0.415854	2091	tags=21%, list=10%, signal=19%	5427/1643/5983/9978/5984/5111/1022/6119/8450
hsa00061	Fatty acid biosynthesis	17	0.382611	0.877604	0.632959	0.821339	0.592242	821	tags=12%, list=4%, signal=11%	55301/51703
hsa04072	Phospholipase D signaling pathway	145	0.381723	1.23084	0.109023	0.274234	0.197741	3322	tags=31%, list=16%, signal=26%	3576/2207/5321/114/2205/1902/5294/113/8612/56034/5293/1606/3579/53358/8877/9846/5594/5154/57121/4893/5156/23533/22800/146850/5336/8395/1608/23566/5737/26052/8605/10161/22808/2915/2206/160851/382/27128/6237/5604/554/1956/5290/553/5900
hsa05414	Dilated cardiomyopathy	95	0.381146	1.16922	0.216981	0.419839	0.302733	3029	tags=22%, list=15%, signal=19%	3694/3673/114/7042/3676/113/284217/6444/3479/3696/7171/3675/3691/93589/3695/4607/3688/6546/779/7134/27092
hsa04068	FoxO signaling pathway	128	0.377518	1.1963	0.163449	0.352019	0.25383	3557	tags=27%, list=17%, signal=22%	3575/3569/1030/7042/114907/8743/6648/5293/1026/8660/3479/10769/5594/3586/1647/4893/10733/1017/1901/9133/80854/51422/356/4193/664/5604/1454/1956/6517/5290/4088/5603/5562/5105
hsa04012	ErbB signaling pathway	84	0.376833	1.14128	0.264586	0.478009	0.344678	3396	tags=26%, list=17%, signal=22%	2069/374/4609/1839/1978/5293/1026/2065/53358/5594/5579/4893/5336/6776/5062/7039/5604/1956/685/817/5290/5063
hsa05165	Human papillomavirus infection	326	0.372171	1.28669	0.0394588	0.131664	0.0949386	2877	tags=22%, list=14%, signal=19%	5743/3371/3694/8900/3914/7058/2335/3673/6696/355/7057/3676/9134/4600/1311/6772/9586/1978/5734/8638/245972/284217/3659/4599/9636/3134/5293/1026/1277/3918/3696/3106/3135/3455/3675/581/3691/10312/5649/5594/3107/3955/4853/7477/4893/1285/90993/1286/3695/1869/92359/1017/10379/3133/890/529/9550/356/523/4193/5933/3688/3105/54626/3381/8326/526/3716/1101/998/1293
hsa04726	Serotonergic synapse	108	0.369694	1.13953	0.23231	0.439106	0.316625	2018	tags=12%, list=10%, signal=11%	5743/240/5321/3357/2561/247/7166/5742/5594/5579/1843/4893/59345
hsa04914	Progesterone-mediated oocyte maturation	89	0.367306	1.11773	0.297151	0.508734	0.366832	3466	tags=25%, list=17%, signal=21%	8900/114/113/5241/4085/5293/983/3479/10459/994/5594/1017/699/9133/890/6790/6793/5604/5290/8379/80315/5603
hsa05211	Renal cell carcinoma	68	0.363297	1.06377	0.365607	0.569302	0.410506	3396	tags=25%, list=17%, signal=21%	4233/7042/112399/5293/1026/9915/9978/5594/4893/3082/5062/7039/998/5604/6513/5290/5063
hsa00513	Various types of N-glycan biosynthesis	39	0.363202	0.971798	0.512195	0.692098	0.49905	3415	tags=28%, list=17%, signal=24%	4121/4124/2530/283358/2683/64377/25834/11320/11282/7991/3074
hsa04310	Wnt signaling pathway	156	0.362987	1.17706	0.179328	0.361976	0.26101	1042	tags=10%, list=5%, signal=9%	4316/6423/6424/11197/5880/8061/4919/5176/4609/22943/84870/27123/8840/144165/85409
hsa04710	Circadian rhythm	30	0.360395	0.920919	0.577778	0.764912	0.551554	3621	tags=30%, list=18%, signal=25%	8553/406/4862/9978/6095/51422/1454/5562/23291
hsa01240	Biosynthesis of cofactors	139	0.359293	1.15126	0.209332	0.407449	0.293799	2462	tags=17%, list=12%, signal=15%	195814/8564/8942/10797/6999/586/2643/3620/8836/129607/205/23057/441024/1503/158/5372/27010/5805/10243/9249/5373/11019/93100
hsa05231	Choline metabolism in cancer	96	0.357561	1.09472	0.318919	0.534802	0.385629	3433	tags=30%, list=17%, signal=25%	5880/5321/1978/6583/8612/56034/5293/1606/56261/5594/5154/1120/5579/4893/5156/2353/8395/1608/8936/7454/56994/8605/160851/10434/5604/1956/5290/5900/126969
hsa03430	Mismatch repair	22	0.356995	0.862952	0.666071	0.857501	0.618317	1916	tags=18%, list=9%, signal=16%	5983/5984/5111/6119
hsa04071	Sphingolipid signaling pathway	116	0.356419	1.1095	0.285904	0.49995	0.360498	4969	tags=35%, list=24%, signal=27%	2207/5880/2205/166929/5293/259230/8877/140/581/4217/9846/5594/637/5579/4893/1901/10558/2206/5604/8879/55304/1509/5290/1903/5523/5603/10672/7132/7157/8698/5521/125981/8439/2534/5295/7124/4790/4985/10000/5601/130367
hsa00220	Arginine biosynthesis	21	0.354011	0.847469	0.671429	0.861008	0.620846	2661	tags=24%, list=13%, signal=21%	2744/2747/2746/27165/384
hsa04014	Ras signaling pathway	227	0.348984	1.16972	0.158451	0.346901	0.25014	3322	tags=25%, list=16%, signal=21%	10125/5880/5321/4914/4233/2247/5320/51365/1436/56034/5293/598/8399/5923/53358/3479/5966/5921/1969/9846/5594/64926/5154/7074/5579/4893/5156/83593/59345/22800/5336/2252/3082/1435/5922/2323/8822/356/8817/55970/5062/8605/22808/7039/26279/998/382/6237/5604/4908/9610/1956/91860/5290/30814/5900
hsa01210	2-Oxocarboxylic acid metabolism	18	0.344003	0.799712	0.736746	0.882945	0.636664	2652	tags=22%, list=13%, signal=19%	586/51166/3417/3419
hsa04932	Non-alcoholic fatty liver disease	143	0.342355	1.10145	0.282663	0.497146	0.358477	2849	tags=15%, list=14%, signal=13%	3576/3569/355/3553/3570/5293/9370/8660/9021/3952/6720/581/4217/637/2353/29796/3953/5465/51422/356/4700/998
hsa05412	Arrhythmogenic right ventricular cardiomyopathy	77	0.341499	1.01803	0.451064	0.658473	0.474804	3029	tags=22%, list=15%, signal=19%	3694/1824/3673/3676/284217/6444/3696/3675/3691/5318/93589/3695/1829/3688/6546/779/27092
hsa05214	Glioma	75	0.339614	1.00502	0.468975	0.672045	0.484591	3300	tags=29%, list=16%, signal=25%	5293/1026/1643/53358/3479/1029/581/5594/5154/5579/1647/4893/5156/5336/1869/4193/7039/5604/1956/817/91860/5290
hsa03450	Non-homologous end-joining	13	0.335205	0.733917	0.811918	0.929491	0.670227	3053	tags=31%, list=15%, signal=26%	7518/2237/3981/79840
hsa04211	Longevity regulating pathway	88	0.333607	1.01414	0.457766	0.665286	0.479717	2187	tags=18%, list=11%, signal=16%	114/113/9586/6648/1978/5293/9370/8660/9365/3479/581/83667/143686/4893/90993/5468
hsa05020	Prion disease	251	0.332743	1.12459	0.223516	0.429939	0.310016	2879	tags=13%, list=14%, signal=11%	4688/713/4689/3569/5880/6352/714/1536/712/653361/9586/3553/5293/3310/730/581/858/857/5594/7277/90993/29796/147700/729/292/6261/731/5621/5534/4700/3710/90550/779
hsa04926	Relaxin signaling pathway	128	0.331685	1.05107	0.382239	0.57672	0.415854	2146	tags=16%, list=11%, signal=15%	6019/114/4318/113/2769/9586/409/5293/53358/1277/1281/5594/4312/6013/4893/1285/90993/2353/59345/1286/4313
hsa04144	Endocytosis	243	0.329407	1.10881	0.248535	0.454027	0.327385	3502	tags=21%, list=17%, signal=18%	3561/3560/1234/3949/2350/409/3134/7852/3579/3310/1601/138429/3106/80223/3135/858/157/857/7456/6456/3107/3559/11031/8027/10095/8853/23362/5156/10565/8395/3133/26052/10097/830/23111/9897/4193/57154/3105/10092/998/50807/382/27128/11021/381/1956/92421/83737/4088/23325/10552
hsa04915	Estrogen signaling pathway	130	0.327326	1.0396	0.395619	0.593428	0.427902	3300	tags=22%, list=16%, signal=18%	3866/114/4318/3880/113/5241/1839/9586/5293/3861/3860/3310/53358/5594/4893/90993/2353/4313/25984/2099/54474/7039/3710/5604/1956/1509/91860/5290
hsa04015	Rap1 signaling pathway	208	0.327251	1.0887	0.293269	0.504732	0.363946	3322	tags=23%, list=16%, signal=20%	2533/5880/3689/114/4233/2247/3684/7057/1902/3683/113/2357/3937/1436/56034/5293/54518/7409/3479/1969/136/5594/5154/57121/7074/5579/4893/5156/83593/7408/2252/23566/3082/1435/8822/6494/8817/22808/3688/998/51735/6237/5604/9732/1956/91860/5290/5900
hsa04912	GnRH signaling pathway	91	0.325558	0.993736	0.479026	0.675178	0.48685	3791	tags=24%, list=19%, signal=20%	5321/114/113/1839/4214/5594/5579/4893/4323/4313/8605/3710/998/779/5604/1956/817/91860/775/5603/6416/5580
hsa01522	Endocrine resistance	95	0.325391	0.998178	0.466307	0.672045	0.484591	2705	tags=20%, list=13%, signal=17%	114/4318/113/1839/5293/1026/53358/3479/1029/581/5594/4853/4893/2353/4313/1869/2099/4193/638
hsa05223	Non-small cell lung cancer	72	0.325338	0.956079	0.539017	0.722372	0.52088	3321	tags=31%, list=16%, signal=26%	4233/5293/3718/1026/1643/1029/581/5594/5579/1647/4893/27436/83593/5336/1869/3082/6776/7039/5604/1956/5290/5979
hsa04725	Cholinergic synapse	111	0.323402	0.999473	0.473333	0.672045	0.484591	3398	tags=23%, list=17%, signal=20%	114/3786/5294/113/9586/3759/5293/3717/56479/5594/5579/4893/90993/2353/59345/23533/6572/146850/55970/9132/3710/779/5604/817/5290/775
hsa04213	Longevity regulating pathway - multiple species	60	0.313852	0.903185	0.612573	0.804463	0.580073	1243	tags=13%, list=6%, signal=13%	114/113/6648/5293/1410/8660/3310/3479
hsa00062	Fatty acid elongation	25	0.313438	0.783735	0.771626	0.901149	0.649791	2054	tags=20%, list=10%, signal=18%	9200/79993/401494/11332/201562
hsa04114	Oocyte meiosis	118	0.313353	0.979303	0.511199	0.692098	0.49905	3621	tags=22%, list=18%, signal=18%	114/9134/113/5241/4085/983/3479/10459/9978/5594/7533/10734/1017/699/9133/6790/5534/3710/5604/898/817/91860/8379/80315/5603/23291
hsa00730	Thiamine metabolism	15	0.312171	0.708181	0.83209	0.941499	0.678886	1845	tags=13%, list=9%, signal=12%	205/27010
hsa05168	Herpes simplex virus 1 infection	456	0.310223	1.09277	0.252973	0.459568	0.33138	1889	tags=13%, list=9%, signal=12%	3117/6347/330/3569/3113/6352/3122/3108/718/355/3127/7097/3123/972/3115/4938/6890/3112/6772/684/1978/29992/7188/3553/3111/152687/4939/3134/5293/3119/163227/598/3717/147660/3126/9021/4940/79230/51135/6891/3106/84436/3135/3455/581/10308/25833/65243/162966/4615/3107/23586/3109/101060200/637/171392/163081/64135
hsa04930	Type II diabetes mellitus	45	0.309062	0.849143	0.719685	0.882945	0.636664	1596	tags=16%, list=8%, signal=14%	3101/5293/9370/8660/9021/5594/8651
hsa04020	Calcium signaling pathway	199	0.306297	1.01302	0.441354	0.650103	0.468769	3312	tags=24%, list=16%, signal=20%	5027/154/3269/3357/114/57105/113/2769/5724/55283/952/56034/7852/2065/113026/5026/8877/255231/5333/136/5154/57192/5579/5136/5156/5261/5336/292/10800/6261/5737/5534/2915/3710/6546/3361/90550/779/7134/84876/3274/56413/1956/817/5731/1909/91860/553
hsa05215	Prostate cancer	97	0.306068	0.939157	0.557333	0.740846	0.534201	3300	tags=24%, list=16%, signal=20%	5328/4318/9134/9586/7113/56034/5293/1026/3479/5594/5154/4893/5156/90993/1869/7850/1017/4193/7039/5604/898/1956/5290
hsa03460	Fanconi anemia pathway	49	0.305545	0.852037	0.704867	0.882945	0.636664	3374	tags=22%, list=17%, signal=19%	29089/116028/55215/675/83990/6119/2177/641/80010/5888/5889
hsa03050	Proteasome	45	0.304597	0.836875	0.735433	0.882945	0.636664	2972	tags=11%, list=15%, signal=10%	5698/5696/5699/3458/5684
hsa04921	Oxytocin signaling pathway	151	0.300692	0.97014	0.516896	0.695576	0.501558	3512	tags=21%, list=17%, signal=17%	5743/5321/5997/114/5294/113/952/3759/1026/5594/5579/29904/4893/2353/23533/93589/146850/6261/51422/8605/5534/3710/779/5604/27092/1956/817/91860/775/4882/5562
hsa00983	Drug metabolism - other enzymes	66	0.299715	0.873702	0.679356	0.867771	0.625722	2623	tags=17%, list=13%, signal=15%	7378/7498/6241/1890/7083/1806/3614/2940/7371/9446/50484
hsa00600	Sphingolipid metabolism	46	0.298138	0.82468	0.755102	0.890458	0.642081	4395	tags=33%, list=22%, signal=26%	8612/166929/259230/8877/7357/410/10558/8879/55304/339221/5660/125981/768239/4759/64781
hsa04978	Mineral absorption	56	0.295664	0.8436	0.729042	0.882945	0.636664	355	tags=5%, list=2%, signal=5%	10568/3162/26872
hsa03010	Ribosome	124	0.293523	0.923792	0.606536	0.799747	0.576673	6724	tags=38%, list=33%, signal=26%	200916/64928/28998/51065/25873/29088/9553/64960/51187/54948/6193/63875/51023/6139/6232/6223/6175/6201/9045/6183/65003/6227/64983/6217/6155/11224/29074/65008/6218/6136/7311/6229/6159/6203/6194/6168/6188/4736/6202/6187/6205/6204/6122/6176/3921/6161/6158
hsa04935	Growth hormone synthesis, secretion and action	118	0.292452	0.913981	0.620553	0.811684	0.58528	3466	tags=23%, list=17%, signal=19%	114/113/6772/9586/5293/3717/8660/9021/53358/3479/4214/5594/8651/5579/4893/90993/2353/5336/6776/3726/3710/779/5604/8835/5290/775/5603
hsa04137	Mitophagy - animal	66	0.291226	0.848957	0.72328	0.882945	0.636664	2965	tags=20%, list=15%, signal=17%	338382/598/10133/9958/55669/4893/22800/1869/22808/10370/664/9474/6237
hsa00360	Phenylalanine metabolism	17	0.284726	0.653083	0.883895	0.951309	0.685959	1328	tags=12%, list=7%, signal=11%	259307/221
hsa05226	Gastric cancer	146	0.283649	0.91338	0.657035	0.849211	0.61234	3480	tags=21%, list=17%, signal=18%	1030/4233/2247/7042/4609/9134/5293/1026/1643/53358/581/5594/7477/1647/4893/1869/1017/2252/3082/8822/8817/8326/7472/5604/7476/898/1956/8323/5290/4088/2255
hsa04540	Gap junction	85	0.281336	0.850106	0.718963	0.882945	0.636664	1974	tags=14%, list=10%, signal=13%	3357/114/1902/113/56034/983/5594/5154/5579/4893/7277/5156
hsa00051	Fructose and mannose metabolism	33	0.277598	0.72186	0.865	0.946003	0.682133	2324	tags=18%, list=11%, signal=16%	3101/57103/5209/5372/231/5373
hsa00230	Purine metabolism	122	0.274984	0.861669	0.733422	0.882945	0.636664	3535	tags=23%, list=17%, signal=19%	114/7498/51816/113/4860/6241/4907/272/100/205/1633/8654/270/158/3614/5136/5634/471/50484/5471/5142/9060/953/3000/4882/51251/5236/22875
hsa04390	Hippo signaling pathway	153	0.27291	0.884384	0.707196	0.882945	0.636664	2259	tags=12%, list=11%, signal=11%	330/3689/374/7042/4609/122786/5054/85409/126374/27113/154796/7477/7533/650/7003/55233/653/4771/166824
hsa04520	Adherens junction	69	0.271751	0.794779	0.8	0.927806	0.669012	3420	tags=19%, list=17%, signal=16%	5880/4233/81607/5594/8826/8936/7454/5777/998/5818/1956/87/4088
hsa00040	Pentose and glucuronate interconversions	23	0.267497	0.653965	0.890653	0.951309	0.685959	1735	tags=13%, list=9%, signal=12%	27294/9365/231
hsa04730	Long-term depression	58	0.26635	0.76359	0.861152	0.946003	0.682133	2981	tags=17%, list=15%, signal=15%	5321/4067/3479/5594/5579/4893/6261/8605/3710/5604
hsa04120	Ubiquitin mediated proteolysis	137	0.265344	0.851667	0.759748	0.890458	0.642081	5303	tags=27%, list=26%, signal=20%	330/90293/1643/9021/9246/4214/9978/8651/55236/11065/55284/8450/7321/7325/4193/57154/7328/9039/83737/23291/389898/7319/329/64750/326/92912/7334/9616/7320/5371/9690/23221/8453/26091/10393/867/7324
hsa00982	Drug metabolism - cytochrome P450	57	0.265272	0.758011	0.855655	0.946003	0.682133	3800	tags=21%, list=19%, signal=17%	27306/2330/221/2940/125/9446/124/2328/130/2326/1571/1565
hsa04929	GnRH secretion	64	0.262285	0.762621	0.850877	0.946003	0.682133	1888	tags=11%, list=9%, signal=10%	3783/6696/409/5293/5594/5579/4893
hsa04920	Adipocytokine signaling pathway	69	0.261659	0.765263	0.831884	0.941499	0.678886	1348	tags=13%, list=7%, signal=12%	4852/51703/3717/9370/8660/9021/3952/4794/7133
hsa04744	Phototransduction	28	0.260508	0.661045	0.917808	0.955807	0.689202	4918	tags=21%, list=24%, signal=16%	1259/6010/3000/91860/810/5148
hsa05213	Endometrial cancer	58	0.260313	0.746283	0.878877	0.951309	0.685959	1888	tags=14%, list=9%, signal=13%	4609/5293/1026/1643/581/5594/1647/4893
hsa04550	Signaling pathways regulating pluripotency of stem cells	139	0.258146	0.827166	0.805801	0.927806	0.669012	3466	tags=19%, list=17%, signal=16%	3624/2247/9314/4609/3976/7044/5293/3718/3717/3479/5594/7477/4893/3572/84108/8326/3716/7472/5604/84333/7476/8323/5290/64211/4088/5603
hsa00510	N-Glycan biosynthesis	49	0.257091	0.716918	0.897959	0.951309	0.685959	2501	tags=16%, list=12%, signal=14%	4121/4124/4248/2530/2683/25834/11320/11282
hsa00140	Steroid hormone biosynthesis	51	0.256596	0.718149	0.893584	0.951309	0.685959	935	tags=6%, list=5%, signal=6%	3290/1545/6820
hsa04721	Synaptic vesicle cycle	77	0.256268	0.763949	0.842553	0.946003	0.682133	3187	tags=19%, list=16%, signal=16%	6857/245972/6809/10312/6539/6616/6572/6536/26052/529/9550/523/526/6505/6506
hsa00562	Inositol phosphate metabolism	73	0.254623	0.753472	0.863053	0.946003	0.682133	4198	tags=29%, list=21%, signal=23%	5294/5293/22876/138429/113026/55361/5305/5333/9108/5336/8395/8897/9107/3635/5290/3633/64419/3706/8394/23007/89869
hsa05110	Vibrio cholerae infection	50	0.253596	0.711205	0.900621	0.951309	0.685959	2834	tags=18%, list=14%, signal=16%	245972/11015/30001/10312/5336/529/9550/523/526
hsa04152	AMPK signaling pathway	120	0.251677	0.788201	0.861478	0.946003	0.682133	2559	tags=15%, list=13%, signal=13%	8900/6319/9586/1978/5293/9370/8660/3952/6720/3479/55437/5209/29904/90993/5468/3953/890/51422
hsa04360	Axon guidance	179	0.249497	0.819836	0.842752	0.946003	0.682133	2694	tags=16%, list=13%, signal=14%	5880/10512/4233/2043/59277/25791/5293/7852/57689/2049/5921/22885/9353/1969/5594/6387/4893/10371/2044/5163/84628/3983/5336/6092/8482/5062/5534/3688
hsa04722	Neurotrophin signaling pathway	119	0.245967	0.770863	0.884211	0.951309	0.685959	3300	tags=18%, list=16%, signal=16%	4914/5293/8767/53358/51135/4794/4214/3656/581/4217/5594/4145/4893/397/5336/356/998/5604/4908/817/91860/5290
hsa03022	Basal transcription factors	41	0.237182	0.641755	0.957997	0.978476	0.705549	2566	tags=15%, list=13%, signal=13%	6875/2963/1022/6883/2959/6880
hsa05225	Hepatocellular carcinoma	162	0.235271	0.765677	0.911111	0.953522	0.687555	3300	tags=18%, list=16%, signal=15%	3162/4233/7042/4609/5293/1026/598/1643/53358/1029/581/5594/7477/5579/1647/4893/2940/5336/1869/3082/9446/7039/8326/7472/5604/7476/1956/8323/5290
hsa04130	SNARE interactions in vesicular transport	33	0.228638	0.594545	0.965	0.978476	0.705549	3998	tags=21%, list=20%, signal=17%	6809/8676/10282/8773/8674/8417/9341
hsa04961	Endocrine and other factor-regulated calcium reabsorption	52	0.222616	0.626871	0.96142	0.978476	0.705549	2817	tags=17%, list=14%, signal=15%	9365/7421/3816/5579/26052/2099/5741/483/6546
hsa05034	Alcoholism	106	0.205039	0.632777	0.985411	0.994535	0.717128	2018	tags=10%, list=10%, signal=9%	9586/84152/4852/53358/2030/136/5594/9734/4893/90993/59345
hsa00511	Other glycan degradation	18	0.180184	0.418877	0.994516	1	0.721069	4368	tags=22%, list=21%, signal=17%	4125/3074/4126/4759
hsa03008	Ribosome biogenesis in eukaryotes	75	0.11201	0.331471	1	1	0.721069	4726	tags=19%, list=23%, signal=14%	51068/25996/55916/134430/55505/4809/22803/10436/10799/10171/51096/79631/55131/55272
hsa04740	Olfactory transduction	127	-0.159911	-0.597896	1	1	0.721069	2466	tags=7%, list=12%, signal=6%	808/5566/816/390066/401427/284521/5592/2774/5138
hsa05017	Spinocerebellar ataxia	141	-0.198026	-0.758181	0.966507	0.978476	0.705549	3189	tags=17%, list=16%, signal=14%	23152/5289/9776/5704/7186/208/10939/5705/2906/5710/54205/342371/26100/291/2259/7436/5602/8408/55102/3748/56652/5332/2905/3708
hsa05010	Alzheimer disease	344	-0.201529	-0.844492	0.943925	0.97064	0.699898	2908	tags=14%, list=14%, signal=12%	5704/7186/6622/208/5705/2906/8324/5710/10383/54205/11211/808/26100/291/4040/347733/3028/23401/7474/4726/10023/3265/5602/10313/4698/7482/8408/8325/55102/8313/1131/8322/5332/2535/3798/2905/1346/54361/4137/56901/3708/7976/3667/84701/3800/10888/6263
hsa03013	RNA transport	155	-0.202243	-0.780489	0.955446	0.978476	0.705549	5814	tags=26%, list=29%, signal=19%	51367/5976/10921/11171/9883/8669/8087/60528/8662/57510/2332/10284/55746/8890/9669/25929/26999/8672/8086/4116/51808/50628/3837/23435/9513/4686/4927/10189/10419/9939/8892/65109/1917/54960/26019/11102/8663/91181/9086/55520/140886
hsa04024	cAMP signaling pathway	212	-0.213163	-0.858673	0.903614	0.951309	0.685959	3837	tags=18%, list=19%, signal=15%	10488/2735/7253/5727/572/207/5338/8503/2778/5443/115/5058/208/2906/808/107/1129/5566/6755/816/5602/64411/627/5350/196883/5021/10451/2905/148327/7432/4881/2770/10411/6262/482/10846/6750/11069/1908
hsa05022	Pathways of neurodegeneration - multiple diseases	448	-0.2146	-0.918871	0.802817	0.927806	0.669012	3179	tags=16%, list=16%, signal=13%	23435/5289/9776/7327/10280/23710/5704/7186/6622/55081/5705/10452/2906/2877/8324/1639/5710/10383/54205/342371/7314/11211/808/26100/291/4040/347733/3028/53349/23401/7474/4726/56171/10023/816/3265/5602/4698/7482/596/8408/8325/9973/627/55102/8313/1131/8322/1770/5332/7345/2535/3798/84134/2905/1346/54361/4137/83544/3309/56901/6262/3708/7976/4747/7802/84701/116442/3800/6263
hsa04910	Insulin signaling pathway	136	-0.218357	-0.824446	0.904762	0.951309	0.685959	4771	tags=28%, list=23%, signal=22%	5576/6464/10580/868/5170/5509/6654/5575/5257/25759/6199/572/207/3643/5590/8503/2645/208/808/5507/5566/3265/3098/10603/2194/5602/7249/2997/92579/5563/3636/32/3099/2308/57521/10891/3667/5837
hsa04973	Carbohydrate digestion and absorption	41	-0.219487	-0.669735	0.939948	0.969599	0.699148	1800	tags=22%, list=9%, signal=20%	476/207/8503/208/3098/92579/3099/5332/482
hsa00270	Cysteine and methionine metabolism	49	-0.219723	-0.693036	0.936986	0.969599	0.699148	2897	tags=18%, list=14%, signal=16%	1789/4191/23382/1036/3948/1491/23743/113675/26227
hsa04742	Taste transduction	75	-0.224749	-0.774505	0.893204	0.951309	0.685959	1248	tags=8%, list=6%, signal=8%	6328/1131/5332/196883/6340/6338
hsa05016	Huntington disease	283	-0.226937	-0.935651	0.736434	0.882945	0.636664	5575	tags=25%, list=27%, signal=18%	11047/6804/5432/7419/5690/4714/10121/10540/5702/4723/10381/1173/1387/79861/5430/161/6647/1327/3831/10382/4720/84617/522/1212/54539/4725/506/10488/1769/513/64837/4702/842/5289/9776/5704/7186/55081/5705/2877/1639/246721/5710/10383/54205/26100/291/347733/25942/4726/56171/8218/5602/3065/4698/8408/627/55102/1770/5332/3798/3766/10891/1346/148327/83544/56901/3708/7802/84701/3800
hsa04070	Phosphatidylinositol signaling system	97	-0.228627	-0.804464	0.912698	0.953522	0.687555	3393	tags=19%, list=17%, signal=16%	8503/5286/5289/10423/9807/8525/808/23396/5298/3636/3613/5332/9110/9162/5287/3708/117283/84812
hsa04150	mTOR signaling pathway	152	-0.229007	-0.876687	0.80303	0.927806	0.669012	3737	tags=21%, list=18%, signal=17%	6199/207/3643/81617/6794/8503/64798/208/8131/8324/11211/10325/4040/7474/3265/9675/84335/7249/534/7482/8408/8325/84219/5563/8322/57521/2887/2535/54361/7976/3667/27330
hsa05031	Amphetamine addiction	69	-0.230395	-0.782716	0.884615	0.951309	0.685959	2892	tags=17%, list=14%, signal=15%	2778/4128/2906/808/4129/5566/816/3065/6570/23237/2905/148327
hsa05014	Amyotrophic lateral sclerosis	340	-0.233989	-0.982174	0.509259	0.692098	0.49905	4372	tags=19%, list=21%, signal=15%	10382/4720/84617/1616/65018/522/9217/54539/4725/506/2066/1769/572/513/64837/4702/7415/842/23435/5289/9776/10280/23710/4686/220988/4927/5704/5217/7186/10189/5705/10452/2906/2877/1639/3084/5710/10383/54205/26100/347733/4726/56171/4698/596/8408/9973/55102/1770/3798/10718/84134/2905/91181/1346/83544/3309/56901/4747/7802/84701/116442/3800
hsa04724	Glutamatergic synapse	112	-0.234205	-0.854247	0.827309	0.941499	0.678886	3474	tags=21%, list=17%, signal=18%	2785/5338/2778/2898/9229/9455/115/2899/9456/2906/107/5566/2901/3760/8681/5332/196883/85358/2905/2770/2900/2791/22941/3708
hsa04723	Retrograde endocannabinoid signaling	139	-0.239323	-0.909635	0.722488	0.882945	0.636664	2434	tags=14%, list=12%, signal=12%	55879/107/5566/4726/3760/5602/1268/4698/5332/196883/2567/2770/2166/56901/2791/2560/3708/2562/2563
hsa03020	RNA polymerase	30	-0.241976	-0.683573	0.928058	0.963412	0.694686	2559	tags=17%, list=13%, signal=15%	246721/84172/11128/55703/84265
hsa00190	Oxidative phosphorylation	117	-0.24285	-0.895937	0.725806	0.882945	0.636664	5952	tags=27%, list=29%, signal=19%	533/7384/514/51382/498/4694/9114/245973/4714/127124/4723/1327/537/4720/479/522/54539/4725/506/495/1355/513/4702/4726/535/534/4698/64077/1346/155066/56901/84701
hsa04146	Peroxisome	82	-0.251913	-0.87283	0.753623	0.890458	0.642081	6422	tags=43%, list=32%, signal=29%	5191/8799/9409/215/5826/54511/84769/10455/5190/25824/30/6647/4598/92960/8310/10654/83594/5192/2181/5193/10901/11264/196743/5189/5195/23417/3295/1384/255027/2053/8800/54677/8309/23600/1962
hsa00564	Glycerophospholipid metabolism	94	-0.25401	-0.896171	0.694981	0.880848	0.635152	4569	tags=33%, list=22%, signal=26%	10554/139189/85465/375775/64600/8613/10162/137964/54947/8526/5338/1103/9926/10423/23171/1119/8525/253558/11313/56894/23646/5833/8681/81490/55224/84803/8611/9162/57678/150763/64850
hsa04022	cGMP-PKG signaling pathway	165	-0.255394	-0.983248	0.505319	0.691378	0.498531	1099	tags=9%, list=5%, signal=9%	5350/5332/196883/148327/4881/5592/2770/3764/482/3708/7225/5138/3667/1910/185
hsa00534	Glycosaminoglycan biosynthesis - heparan sulfate / heparin	24	-0.259198	-0.691723	0.904651	0.951309	0.685959	4709	tags=38%, list=23%, signal=29%	126792/64131/64132/2135/11285/2131/26229/266722/90161
hsa04911	Insulin secretion	84	-0.261378	-0.904695	0.686792	0.873857	0.630111	1192	tags=24%, list=6%, signal=23%	2778/2767/6844/115/2645/3767/107/5566/816/1131/27445/5332/196883/148327/6833/3781/6262/482/3782/11069
hsa04141	Protein processing in endoplasmic reticulum	165	-0.261508	-1.00679	0.430851	0.637504	0.459684	4191	tags=26%, list=21%, signal=21%	23193/55968/5589/3305/5034/64215/11253/56886/10134/10273/201595/7415/57134/23640/7993/6185/7327/5611/3703/9632/7095/80331/7186/10130/3300/80700/51009/440275/5602/6238/10956/596/3306/64374/51726/2923/811/7184/10525/9601/3309/56605/7466
hsa04931	Insulin resistance	108	-0.270812	-0.982056	0.486166	0.675576	0.487137	1611	tags=16%, list=8%, signal=15%	5602/2997/92579/5563/9882/32/2308/10891/5588/148327/10999/948/11000/183/3667/5837/27330
hsa04371	Apelin signaling pathway	135	-0.273509	-1.03004	0.372642	0.570852	0.411623	3737	tags=24%, list=18%, signal=19%	6199/207/4638/2785/4209/5289/23710/59/115/208/5581/9759/1958/808/107/8862/5566/3265/4089/5327/5563/5332/56848/196883/4635/10891/2770/2791/6262/3708/6263/185
hsa04140	Autophagy - animal	136	-0.274189	-1.03525	0.352381	0.562091	0.405306	3737	tags=26%, list=18%, signal=22%	6199/572/207/6794/84938/8503/5289/9776/64798/23710/79065/83734/208/26100/10325/5515/53349/5566/3265/23192/440275/84335/5602/7249/84971/596/8408/5563/55102/57521/58476/5588/9110/3708/3667/116442
hsa05030	Cocaine addiction	49	-0.274713	-0.866481	0.726027	0.882945	0.636664	3331	tags=24%, list=16%, signal=21%	3725/10488/2778/4128/2906/4129/5566/6570/627/2905/148327/2770
hsa05224	Breast cancer	145	-0.275754	-1.0548	0.308824	0.525157	0.378674	2975	tags=21%, list=15%, signal=18%	1021/2260/208/8324/11211/6934/4040/10912/23401/7474/10023/3265/4616/3280/7482/8325/8313/8322/28514/3714/2535/4855/672/54361/23462/7976/2324/1950/3815/83439
hsa02010	ABC transporters	44	-0.276948	-0.850055	0.739837	0.882945	0.636664	3303	tags=25%, list=16%, signal=21%	89845/154664/5243/10058/21/85320/11194/10347/20/6833/9429
hsa00020	Citrate cycle (TCA cycle)	30	-0.277579	-0.784151	0.81295	0.929491	0.670227	5299	tags=33%, list=26%, signal=25%	1743/3418/48/5161/2271/1738/55753/4191/5160/3420
hsa04962	Vasopressin-regulated water reabsorption	44	-0.280921	-0.86225	0.712737	0.882945	0.636664	4384	tags=32%, list=22%, signal=25%	9230/140735/1783/10488/2778/6844/51626/115/5869/1639/5566/4905/148327/361
hsa05012	Parkinson disease	229	-0.284459	-1.15318	0.0945946	0.261533	0.188583	5945	tags=29%, list=29%, signal=21%	5717/7384/5567/514/498/5715/4694/6531/11315/11047/7419/5690/5335/4714/5702/4723/10381/79861/9927/1327/7317/3831/10382/4720/84617/1616/65018/522/54539/4725/506/513/64837/4702/2778/842/7327/5704/4128/6622/5705/5710/10383/54205/7314/808/4129/291/347733/5566/4726/816/5602/6570/4698/7345/3798/1346/2770/4137/3309/56901/2774/3708/84701/3800/6263
hsa03018	RNA degradation	77	-0.284486	-0.9799	0.474747	0.672045	0.484591	2106	tags=26%, list=10%, signal=23%	27258/25904/5073/5211/64282/10766/4848/57472/115752/5213/2026/4850/23644/9924/6499/23016/4849/131870/2027/140886
hsa04728	Dopaminergic synapse	132	-0.284847	-1.08154	0.269912	0.484951	0.349683	3861	tags=22%, list=19%, signal=18%	55844/10488/207/9575/2785/5526/2778/28227/3762/4128/208/808/4129/5515/5528/5566/3760/816/5602/6570/50632/5332/3798/148327/2770/2774/2791/3708/3800
hsa01212	Fatty acid metabolism	55	-0.285802	-0.919613	0.630499	0.821339	0.592242	4526	tags=38%, list=22%, signal=30%	8310/3992/2181/1374/34/36/9524/1376/7923/1892/3295/37/197322/84869/2194/35/126129/79071/54898/1962/6785
hsa04714	Thermogenesis	215	-0.286207	-1.15929	0.108434	0.274234	0.197741	4394	tags=24%, list=22%, signal=19%	57492/4720/25915/6654/2181/1374/5346/522/54539/6601/23028/4725/506/10488/6199/1376/1355/513/4702/2778/51103/2260/6603/8289/115/6602/107/5566/4726/63976/3265/116228/656/84335/7249/1268/4698/5563/57521/196883/123096/353500/126129/10891/90639/1346/148327/4881/5592/56901/84701/27330
hsa04261	Adrenergic signaling in cardiomyocytes	148	-0.288335	-1.09947	0.228856	0.435092	0.313731	3861	tags=22%, list=19%, signal=18%	55844/10488/207/783/784/5526/2778/28227/115/208/7169/808/5515/107/5528/3784/5566/816/596/5350/5332/196883/4635/148327/2770/183/10411/6262/482/9254/11069/6330/185
hsa04270	Vascular smooth muscle contraction	130	-0.288766	-1.09052	0.238938	0.446473	0.321938	4118	tags=27%, list=20%, signal=22%	27094/2982/1907/140465/9826/72/4638/2778/2767/59/115/2983/5581/808/107/4660/5566/8681/10335/796/2977/5332/196883/10266/10203/10268/5588/4881/5592/183/94274/552/3708/1908/185
hsa03410	Base excision repair	33	-0.289182	-0.837105	0.738806	0.882945	0.636664	4449	tags=36%, list=22%, signal=28%	4968/27301/23583/142/27343/4595/3980/7515/5425/4913/252969/7374
hsa03040	Spliceosome	126	-0.292099	-1.08957	0.244541	0.451292	0.325413	7023	tags=44%, list=35%, signal=29%	2521/58517/11325/51729/1659/10992/27339/1655/57187/27316/10907/3192/84950/10285/11338/6427/4670/9129/10523/10772/27258/22827/9879/6625/51340/55119/199746/3305/10262/9092/4116/10929/57461/26121/24148/10569/9416/10594/23450/4686/220988/6627/6100/10189/10450/10946/151903/9939/6626/9716/56259/25766/9785/51645/3306/8175
hsa04934	Cushing syndrome	153	-0.30078	-1.15307	0.142857	0.324405	0.233918	3331	tags=24%, list=16%, signal=20%	2778/2767/5443/8085/1021/5087/115/8324/11211/107/6934/5566/7474/8911/816/3776/7482/5929/8325/8622/8313/51655/8322/5332/196883/2535/949/148327/54361/2770/1031/183/3708/7976/3777/83439/185
hsa04976	Bile secretion	79	-0.304355	-1.05044	0.349153	0.562091	0.405306	2618	tags=19%, list=13%, signal=17%	115/5243/107/2052/5566/6522/54490/196883/949/3781/482/361/760/8671/9429
hsa00430	Taurine and hypotaurine metabolism	11	-0.305972	-0.667791	0.864119	0.946003	0.682133	3702	tags=73%, list=18%, signal=60%	2687/2571/339896/570/84890/2686/51380/1036
hsa04979	Cholesterol metabolism	50	-0.308324	-0.978198	0.502793	0.690813	0.498123	804	tags=20%, list=4%, signal=19%	114879/29116/335/949/948/9388/4036/4043/3990/1071
hsa00130	Ubiquinone and other terpenoid-quinone biosynthesis	11	-0.310507	-0.677689	0.85138	0.946003	0.682133	3381	tags=18%, list=17%, signal=15%	10229/1728
hsa03060	Protein export	23	-0.310535	-0.821735	0.751724	0.890458	0.642081	5035	tags=48%, list=25%, signal=36%	28972/55176/6730/11231/58477/6727/6726/9789/7095/90701/3309
hsa04924	Renin secretion	69	-0.313664	-1.06561	0.339744	0.554388	0.399752	1088	tags=13%, list=5%, signal=12%	2977/5332/4881/2770/183/1636/3708/1908/185
hsa00010	Glycolysis / Gluconeogenesis	65	-0.314707	-1.05844	0.339506	0.554388	0.399752	2787	tags=20%, list=14%, signal=17%	501/2645/5213/5160/226/2026/3098/92579/3948/3099/217/2027/5224
hsa04720	Long-term potentiation	67	-0.317307	-1.07036	0.312102	0.526069	0.379332	2631	tags=16%, list=13%, signal=14%	2906/808/107/5566/816/3265/5332/2905/10411/3708/27330
hsa00450	Selenocompound metabolism	16	-0.32001	-0.784164	0.757447	0.890458	0.642081	6629	tags=56%, list=33%, signal=38%	22928/51540/10587/7296/114112/51091/4548/22929/1491
hsa04727	GABAergic synapse	89	-0.320992	-1.12652	0.226415	0.432969	0.312201	1086	tags=13%, list=5%, signal=13%	6540/196883/4905/5334/2567/2770/6529/2791/18/2560/2562/2563
hsa04927	Cortisol synthesis and secretion	64	-0.328628	-1.09543	0.279874	0.497146	0.358477	3331	tags=28%, list=16%, signal=24%	2778/2767/5443/5087/115/107/5566/8911/3776/8622/5332/196883/949/148327/183/3708/3777/185
hsa04919	Thyroid hormone signaling pathway	120	-0.331823	-1.22874	0.0819672	0.231063	0.166612	3989	tags=31%, list=20%, signal=25%	8841/10025/4851/572/207/5208/8503/8648/842/6258/9968/6257/652/208/1734/5213/23389/8850/5566/25942/3265/7067/3065/7249/9882/5350/53919/2308/5332/4855/54361/10231/117247/482/84812/6567/1733
hsa00052	Galactose metabolism	31	-0.33268	-0.944212	0.553086	0.738201	0.532294	2776	tags=29%, list=14%, signal=25%	2592/2645/5213/8704/3098/2548/92579/3099/57016
hsa03015	mRNA surveillance pathway	91	-0.334498	-1.17507	0.148289	0.332127	0.239486	8501	tags=57%, list=42%, signal=33%	5501/10978/10898/51585/8189/4440/80335/2733/11269/51692/23049/5525/65110/10914/29894/5520/1478/53981/2521/56903/23708/55308/22794/11052/5976/10921/9887/10284/81608/23381/2935/5522/29101/55844/4116/55339/5526/28227/23435/10767/8106/4686/64895/10189/9939/1477/65109/5515/5528/26019/23293/140886
hsa04340	Hedgehog signaling pathway	48	-0.335805	-1.0597	0.356757	0.563572	0.406374	4027	tags=27%, list=20%, signal=22%	8945/2735/5727/374654/11127/8405/5566/1954/596/50937/91653/6608/4036
hsa04260	Cardiac muscle contraction	81	-0.337304	-1.16377	0.172043	0.356335	0.256942	854	tags=9%, list=4%, signal=8%	84679/4635/1346/6262/482/9254/84701
hsa05032	Morphine addiction	91	-0.338354	-1.18862	0.136882	0.319718	0.230538	2434	tags=18%, list=12%, signal=16%	55879/107/5566/3760/2868/8622/196883/2567/2770/2791/2560/10846/2562/5138/27115/2563
hsa04925	Aldosterone synthesis and secretion	96	-0.340718	-1.2039	0.141221	0.323088	0.232969	3331	tags=25%, list=16%, signal=21%	2778/2767/5443/3762/115/5581/808/107/5566/8911/816/5332/196883/949/148327/8536/57118/4881/183/482/3708/3777/5138/185
hsa04922	Glucagon signaling pathway	105	-0.345291	-1.24139	0.104839	0.274234	0.197741	2776	tags=21%, list=14%, signal=18%	2645/208/5213/23235/808/5160/5566/200186/816/2997/92579/5563/3948/32/2308/5332/126129/10891/148327/3708/5837/5224
hsa00514	Other types of O-glycan biosynthesis	46	-0.346161	-1.07277	0.356164	0.563572	0.406374	2551	tags=26%, list=13%, signal=23%	50614/283464/2590/8704/55568/29954/10585/374378/84620/117248/57452/64409
hsa04975	Fat digestion and absorption	42	-0.347591	-1.06248	0.369272	0.570852	0.411623	804	tags=29%, list=4%, signal=27%	10554/8513/64600/8613/1056/8694/335/949/8611/10999/948/84649
hsa04966	Collecting duct acid secretion	27	-0.349902	-0.970993	0.502336	0.690813	0.498123	1524	tags=19%, list=7%, signal=17%	535/534/1188/155066/760
hsa04330	Notch signaling pathway	53	-0.355853	-1.12822	0.236311	0.444102	0.320228	4676	tags=34%, list=23%, signal=26%	23493/5664/1857/4854/4851/55534/26508/342371/8850/1488/1840/196403/3065/3280/28514/3714/4855/23462
hsa00350	Tyrosine metabolism	36	-0.358993	-1.06506	0.365239	0.569302	0.410506	3012	tags=19%, list=15%, signal=17%	5409/4128/4129/7306/8639/3081/7173
hsa04713	Circadian entrainment	97	-0.364843	-1.28377	0.0714286	0.210425	0.151731	3497	tags=27%, list=17%, signal=22%	5187/2785/2778/3762/115/2983/2906/808/107/8864/5566/8911/3760/816/8863/2977/51655/5332/196883/2905/5592/2770/2791/6262/3708/6263
hsa04971	Gastric acid secretion	74	-0.367761	-1.26455	0.116883	0.286875	0.206856	2466	tags=23%, list=12%, signal=20%	808/107/3784/5566/816/3776/6522/1131/5332/196883/3766/2770/482/3708/760/115111/6750
hsa04950	Maturity onset diabetes of the young	25	-0.368218	-0.994816	0.474057	0.672045	0.484591	2776	tags=16%, list=14%, signal=14%	2645/3087/3280/3170
hsa00512	Mucin type O-glycan biosynthesis	31	-0.368634	-1.04626	0.382716	0.57672	0.415854	3229	tags=29%, list=16%, signal=24%	6483/50614/2590/6482/55568/374378/117248/57452/64409
hsa00030	Pentose phosphate pathway	29	-0.368678	-1.03556	0.409524	0.611481	0.44092	5483	tags=41%, list=27%, signal=30%	9563/8789/132158/5211/6888/414328/5213/5631/226/64080/2539/9104
hsa00970	Aminoacyl-tRNA biosynthesis	24	-0.372475	-0.994026	0.483721	0.675576	0.487137	6735	tags=50%, list=33%, signal=33%	54938/51067/23438/57176/57505/10056/51091/283459/25973/2193/10667/124454
hsa01230	Biosynthesis of amino acids	70	-0.3751	-1.27245	0.0912052	0.254907	0.183805	2708	tags=21%, list=13%, signal=19%	5213/5631/3420/226/2026/445/65263/162417/84706/1491/113675/2027/5723/26227/5224
hsa00500	Starch and sucrose metabolism	32	-0.375557	-1.07353	0.342432	0.554388	0.399752	1800	tags=22%, list=9%, signal=20%	3098/2997/2548/92579/3099/5169/5837
hsa00310	Lysine degradation	63	-0.385341	-1.28081	0.0959752	0.261533	0.188583	5510	tags=52%, list=27%, signal=38%	85007/29072/9869/64754/5352/219/51111/55870/223/6419/11105/1738/54904/83852/55904/7799/1892/8085/23067/501/79823/123688/5351/387893/55526/63976/64324/10157/7468/2639/6839/217/1962
hsa00250	Alanine, aspartate and glutamate metabolism	35	-0.392692	-1.15509	0.245658	0.451292	0.325413	1591	tags=26%, list=8%, signal=24%	445/57494/84706/8659/443/80150/339983/18/2346
hsa05217	Basal cell carcinoma	62	-0.395765	-1.30778	0.081761	0.231063	0.166612	2922	tags=27%, list=14%, signal=24%	652/374654/8324/11211/6934/10912/7474/4616/7482/8325/8313/8322/2535/54361/6608/7976/83439
hsa00563	Glycosylphosphatidylinositol (GPI)-anchor biosynthesis	25	-0.399118	-1.0783	0.351415	0.562091	0.405306	5073	tags=40%, list=25%, signal=30%	128869/84720/80055/2822/8818/93183/51604/94005/8733/9091
hsa00532	Glycosaminoglycan biosynthesis - chondroitin sulfate / dermatan sulfate	20	-0.402653	-1.04068	0.417234	0.620161	0.447179	4709	tags=55%, list=23%, signal=42%	126792/79586/64131/64132/11285/10090/50515/26229/55501/56548/113189
hsa04960	Aldosterone-regulated sodium reabsorption	36	-0.403641	-1.19752	0.188917	0.376682	0.271613	288	tags=14%, list=1%, signal=14%	482/6340/6338/3667/3291
hsa04916	Melanogenesis	100	-0.40371	-1.43196	0.00813008	0.0309132	0.0222905	2877	tags=25%, list=14%, signal=22%	115/4254/8324/11211/808/107/6934/5566/7474/816/3265/7306/7482/8325/8322/5332/196883/2535/148327/54361/2770/7976/3815/1910/83439
hsa00071	Fatty acid degradation	42	-0.404211	-1.23555	0.177898	0.36132	0.260536	5616	tags=48%, list=28%, signal=35%	10455/10449/219/30/8310/223/2181/1374/34/36/1376/1892/501/37/1632/2639/217/35/126129/1962
hsa00561	Glycerolipid metabolism	61	-0.405061	-1.3376	0.05	0.157212	0.11336	1084	tags=26%, list=5%, signal=25%	501/8525/8694/253558/56894/84803/217/26007/8611/9388/57016/9162/57678/3990/150763/84649
hsa01200	Carbon metabolism	115	-0.411922	-1.50839	0.0120968	0.0439516	0.0316921	5483	tags=41%, list=27%, signal=30%	9563/8789/4524/48/5232/5096/5161/2271/2875/132158/2806/4594/5211/8310/6888/26275/7167/1738/2653/1892/55753/414328/4199/2645/5213/4191/5631/5160/3420/4329/226/2026/3098/283871/84706/3099/26007/35/2539/9104/113675/2027/1962/5723/26227/5224/2731
hsa00280	Valine, leucine and isoleucine degradation	48	-0.414798	-1.30898	0.105405	0.274234	0.197741	5411	tags=58%, list=27%, signal=43%	10449/5096/219/27034/30/4594/587/223/26275/34/1738/36/3158/1629/65985/1892/501/197322/3712/3157/3028/64064/4329/593/217/35/1962/18
hsa00620	Pyruvate metabolism	38	-0.42051	-1.26004	0.145455	0.328025	0.236529	5138	tags=39%, list=25%, signal=30%	219/5161/2271/223/3945/2739/1738/4199/501/4191/5160/3948/32/217/197257
hsa00100	Steroid biosynthesis	20	-0.425783	-1.10046	0.342404	0.554388	0.399752	3245	tags=45%, list=16%, signal=38%	6713/1056/1595/2222/50814/1717/51478/7108/1594
hsa04977	Vitamin digestion and absorption	22	-0.427383	-1.12459	0.309955	0.525157	0.378674	2672	tags=23%, list=13%, signal=20%	6573/335/686/949/2346
hsa04614	Renin-angiotensin system	22	-0.447132	-1.17656	0.242081	0.449776	0.32432	565	tags=18%, list=3%, signal=18%	183/1636/2028/185
hsa00900	Terpenoid backbone biosynthesis	22	-0.472712	-1.24387	0.183258	0.36764	0.265094	6308	tags=64%, list=31%, signal=44%	10269/51449/91734/3156/57107/3422/4598/10654/2342/79947/116150/3158/4597/3157
hsa00053	Ascorbate and aldarate metabolism	21	-0.483861	-1.26653	0.165158	0.352019	0.25383	5138	tags=48%, list=25%, signal=36%	219/7364/10941/223/7358/55586/501/54490/217/9104
hsa05033	Nicotine addiction	39	-0.488851	-1.47917	0.0413437	0.136559	0.0984687	753	tags=18%, list=4%, signal=17%	2906/55879/2905/2567/2560/2562/2563
hsa00330	Arginine and proline metabolism	49	-0.490673	-1.54765	0.00547945	0.0215877	0.0155662	5138	tags=49%, list=25%, signal=37%	219/113451/29920/2806/112849/223/2628/4942/1159/5033/283208/79814/55748/4128/501/4129/84735/65263/8659/217/57571/1152/112817/26
hsa04918	Thyroid hormone synthesis	73	-0.49798	-1.69736	0.00332226	0.0137516	0.00991587	2364	tags=30%, list=12%, signal=27%	2877/107/7270/432/5566/7038/7849/5332/389434/196883/7184/148327/9601/53905/3309/4036/482/3708/50506/5172/7173/405753
hsa04136	Autophagy - other	31	-0.50495	-1.43315	0.0567901	0.173555	0.125145	3451	tags=39%, list=17%, signal=32%	84938/5289/9776/23710/79065/83734/26100/5515/23192/84971/55102/57521
hsa00630	Glyoxylate and dicarboxylate metabolism	30	-0.517142	-1.46091	0.0455636	0.146071	0.105328	5299	tags=37%, list=26%, signal=27%	48/5096/132158/4594/81888/1738/2653/4191/283871/112817/2731
hsa00340	Histidine metabolism	22	-0.549613	-1.44622	0.0633484	0.190045	0.137036	3088	tags=41%, list=15%, signal=35%	55748/4128/501/4129/84735/217/443/57571/26
hsa00072	Synthesis and degradation of ketone bodies	10	-0.550244	-1.17386	0.28178	0.497146	0.358477	3678	tags=50%, list=18%, signal=41%	3158/56898/3157/64064/622
hsa00640	Propanoate metabolism	34	-0.55317	-1.61053	0.0101266	0.0376295	0.0271334	5181	tags=56%, list=25%, signal=42%	160287/31/5096/4594/79611/8310/26275/3945/1738/1629/1892/23417/4329/593/3948/32/35/1962/18
hsa00410	beta-Alanine metabolism	30	-0.567503	-1.60318	0.0167866	0.0596653	0.0430228	4526	tags=53%, list=22%, signal=42%	8310/223/26275/314/1892/55748/23417/501/4329/84735/217/35/57571/8639/1962/18
hsa00910	Nitrogen metabolism	17	-0.573158	-1.41847	0.0726496	0.212111	0.152946	523	tags=18%, list=3%, signal=17%	771/760/762
hsa00515	Mannose type O-glycan biosynthesis	22	-0.579941	-1.52603	0.0361991	0.123303	0.0889101	2961	tags=41%, list=15%, signal=35%	84892/11041/79147/8704/29954/120071/10585/148789/27087
hsa04964	Proximal tubule bicarbonate reclamation	22	-0.583088	-1.53431	0.0316742	0.109026	0.0786152	288	tags=18%, list=1%, signal=18%	482/760/8671/762
hsa00260	Glycine, serine and threonine metabolism	38	-0.594879	-1.78252	0.0025974	0.0108891	0.0078518	1462	tags=42%, list=7%, signal=39%	2628/314/1738/2653/4128/501/4129/29958/27232/1491/113675/8639/5723/26227/5224/2731
hsa00650	Butanoate metabolism	26	-0.616923	-1.68835	0.00702576	0.0270285	0.0194894	3973	tags=65%, list=20%, signal=53%	7915/54511/116285/123876/6296/3158/65985/56898/1892/79944/3157/64064/622/54988/35/1962/18
GSEA enrichment analysis of ICIcluster 2 and ICIcluster 3
ID	Description	setSize	enrichmentScore	NES	pvalue	p.adjust	qvalues	rank	leading_edge	core_enrichment
hsa05330	Allograft rejection	35	0.878179	2.09292	0.00136986	0.00678705	0.00502502	2122	tags=83%, list=10%, signal=74%	3002/3126/3458/942/3112/3108/5551/3113/3115/3117/940/3111/941/3593/3122/3134/356/3127/3123/3119/7124/3133/3135/3106/3107/958/959/3109/3586
hsa05310	Asthma	28	0.874916	2.01244	0.00143472	0.00700229	0.00518438	2122	tags=68%, list=10%, signal=61%	3126/3112/2207/3108/3113/3115/3117/3111/3122/3127/3123/3119/7124/6356/958/959/2205/3109/3586
hsa05340	Primary immunodeficiency	36	0.870592	2.08264	0.00136054	0.00678705	0.00502502	1139	tags=53%, list=6%, signal=50%	973/3561/3932/29851/3575/930/916/695/925/5788/915/7535/57379/6891/6890/100/920/4261/3718
hsa04672	Intestinal immune network for IgA production	45	0.864719	2.14496	0.00132626	0.00678705	0.00502502	2122	tags=71%, list=10%, signal=64%	608/29851/3126/942/10673/3676/7852/3112/57379/3108/3113/3569/3115/3117/940/3601/9020/3111/941/3122/6387/5284/3127/3695/3123/3119/7040/958/959/3109/23495/3586
hsa05332	Graft-versus-host disease	40	0.862845	2.09712	0.00136054	0.00678705	0.00502502	1689	tags=72%, list=8%, signal=67%	3002/3126/3458/942/3821/3112/3108/3824/5551/3113/3569/3115/3117/940/3553/3111/941/3122/3134/356/3127/3123/3119/7124/3133/3135/3812/3106/3107
hsa04940	Type I diabetes mellitus	41	0.862149	2.10061	0.00136054	0.00678705	0.00502502	1747	tags=66%, list=9%, signal=60%	3002/3126/3458/942/3112/3108/5551/3113/3115/3117/940/3553/3111/941/3593/3122/3134/356/3127/3123/3119/7124/3133/3135/3106/3107/4049
hsa05322	Systemic lupus erythematosus	51	0.859871	2.17843	0.00130039	0.00678705	0.00502502	2163	tags=69%, list=11%, signal=61%	2214/3126/3458/716/942/715/3112/2215/713/717/714/3108/712/2209/3113/3115/3117/940/3111/941/730/2212/3122/718/3127/3123/3119/7124/6737/958/959/3109/3586/87/721
hsa05320	Autoimmune thyroid disease	49	0.854287	2.15189	0.00130208	0.00678705	0.00502502	2122	tags=57%, list=10%, signal=51%	3002/3126/942/3112/3108/5551/3113/3115/1493/3117/940/3111/941/3122/3134/356/3127/3123/3119/3133/3135/3106/7173/3107/958/959/3109/3586
hsa04061	Viral protein interaction with cytokine and cytokine receptor	94	0.850427	2.2876	0.00116009	0.00678705	0.00502502	1622	tags=54%, list=8%, signal=50%	10563/6373/1236/6363/4283/3561/3627/3560/8809/6375/6351/1235/6366/6352/6367/6364/729230/1234/7852/3587/3579/3570/1230/2919/1436/2833/6348/6361/3569/3559/5473/8743/9547/6347/7133/6374/6387/6368/3606/2921/10344/6355/8764/7124/8740/643/6362/8807/6356/6376/3576
hsa04640	Hematopoietic cell lineage	95	0.84931	2.28386	0.00116414	0.00678705	0.00502502	1188	tags=56%, list=6%, signal=53%	952/914/3575/1380/930/3126/931/916/3574/925/917/915/913/1438/951/3676/3112/924/910/909/3570/911/3108/1436/2209/3113/3569/3559/3115/945/3117/7850/3553/3111/1378/920/3122/3684/3127/3123/2323/2322/290/2208/921/3673/929/1379/1441/912/3566/3119/7124
hsa05150	Staphylococcus aureus infection	82	0.843653	2.23889	0.00120192	0.00678705	0.00502502	1351	tags=49%, list=7%, signal=46%	2214/3683/2359/3126/716/2213/715/3112/2215/728/3689/713/717/719/714/3108/712/5724/2209/3113/3115/2357/6403/9103/3117/629/6404/3111/2212/3122/3684/718/3127/3861/3123/3119/3383/3868/3426/3860
hsa05140	Leishmaniasis	74	0.827208	2.16939	0.0012285	0.00678705	0.00502502	1335	tags=53%, list=7%, signal=49%	2214/3126/3458/4689/4688/3676/3112/653361/2215/3689/1536/5579/3108/2209/3113/6772/3115/9103/3117/3553/3111/3593/1378/2212/3122/3684/3717/718/7099/3127/3123/7097/7043/1379/3654/3119/7124/5777/4615
hsa04612	Antigen processing and presentation	72	0.817375	2.13849	0.0012407	0.00678705	0.00502502	2660	tags=62%, list=13%, signal=55%	3126/3458/3823/925/3821/3112/3310/3108/6891/3824/6890/3113/3115/3117/3111/10437/920/3122/3134/4261/972/3127/3123/8302/1520/3119/7124/3133/3135/5721/3812/6892/3106/3107/3109/100132285/3803/5993/567/3105/115653/1514/3805/5720/3810
hsa05321	Inflammatory bowel disease	63	0.81042	2.09295	0.00127065	0.00678705	0.00502502	1731	tags=56%, list=9%, signal=51%	3561/50615/3126/8809/3458/64127/3112/3108/6775/3113/6772/3569/3115/3117/3553/3111/3593/30009/3594/3122/7099/3127/3606/3123/7097/7043/3566/3119/7124/3595/4772/8807/7100/7040/51561
hsa04064	NF-kappa B signaling pathway	100	0.809543	2.19041	0.0011534	0.00678705	0.00502502	2642	tags=60%, list=13%, signal=52%	6363/3932/330/597/695/6351/6366/10673/7535/4050/7128/8600/7412/5579/2919/23643/27040/7185/3553/9020/7188/6387/8792/5971/7099/84433/4616/2921/929/5336/3654/4067/4791/7124/3383/8740/4615/23586/7187/5328/3576/4792/4049/958/5743/1540/10892/959/6357/2920/148022/142/3554/10912/472/6850/353376/3929/4790/5970
hsa05323	Rheumatoid arthritis	88	0.807952	2.15061	0.00118203	0.00678705	0.00502502	2167	tags=57%, list=11%, signal=51%	3683/3126/3458/942/6352/10673/6364/4050/3112/3689/8600/3108/2919/3113/6348/3569/54/3115/1493/1513/3117/940/6347/3553/3111/941/6374/3122/6387/8792/7099/3127/3606/3123/2921/7097/4312/7043/3119/7124/3383/10312/3576/7040/51561/1435/3109/2920/1437/3589
hsa04658	Th1 and Th2 cell differentiation	90	0.791632	2.11784	0.00116959	0.00678705	0.00502502	1464	tags=40%, list=7%, signal=37%	3561/3932/864/919/3560/3126/3458/916/917/915/7535/3112/3108/6775/3113/6772/3559/3115/27040/3117/3111/3593/30009/920/3594/3122/3717/3127/3123/3718/4794/3566/3119/3595/4772/4773
hsa05144	Malaria	47	0.785158	1.97006	0.00131234	0.00678705	0.00502502	2526	tags=74%, list=12%, signal=65%	3683/3458/3689/7412/3820/7058/3569/6401/6403/6347/3553/1311/1378/2532/7099/3606/7057/7097/7043/1379/3082/7124/3383/4615/2995/6382/3576/7040/958/959/54106/3586/7059/5175/4035
hsa05143	African trypanosomiasis	35	0.784707	1.87015	0.00136986	0.00678705	0.00502502	2122	tags=54%, list=10%, signal=49%	3620/3458/7412/5579/3569/6401/8542/3553/3593/356/3606/7124/3383/4615/5330/169355/2150/54106/3586
hsa05416	Viral myocarditis	57	0.783966	2.00854	0.00127551	0.00678705	0.00502502	1998	tags=53%, list=10%, signal=48%	3683/3126/942/3112/3689/3108/5880/5551/3113/3115/3117/940/3111/941/3122/3134/3127/3123/3119/3383/3908/3133/3135/3106/3107/958/959/836/841/3109
hsa04060	Cytokine-cytokine receptor interaction	283	0.777291	2.25561	0.0010225	0.00678705	0.00502502	2385	tags=42%, list=12%, signal=38%	10563/608/6373/1236/6363/4283/3561/3627/50615/3575/1439/3560/8809/9235/3458/3574/6375/6351/1235/6366/6352/10673/6367/1438/6364/729230/1234/7852/4050/10663/939/3587/3579/3604/8600/10148/3570/1230/2919/3603/1436/2833/6348/6361/3569/3559/944/5473/7850/8743/3601/3624/9547/6347/3553/7292/8784/9180/3593/90865/7133/920/6374/3594/356/6387/8792/6368/3606/2921/10344/6355/7043/8764/27242/1441/3566/7124/8740…
hsa04610	Complement and coagulation cascades	84	0.775305	2.05636	0.00119904	0.00678705	0.00502502	2163	tags=45%, list=11%, signal=41%	1380/716/2153/715/728/3689/713/717/719/714/712/11326/5329/629/3687/730/1378/2162/3684/718/710/5054/2151/1379/3426/3078/5345/5328/3075/3080/7035/10544/5055/2152/5327/1675/5104/721
hsa05134	Legionellosis	54	0.774934	1.97077	0.00129032	0.00678705	0.00502502	2004	tags=52%, list=10%, signal=47%	834/3689/3310/2919/3569/3553/3593/1378/3684/718/7099/58484/29108/3606/2921/7097/929/1379/4791/7124/840/4615/7100/3576/4792/836/841/2920
hsa04062	Chemokine signaling pathway	186	0.767431	2.18686	0.00106157	0.00678705	0.00502502	2004	tags=39%, list=10%, signal=36%	10563/6373/1236/6363/3702/4283/3627/7409/6375/6351/1235/3055/6366/5294/6352/6367/1794/6364/729230/1234/7852/10663/653361/3579/1230/5579/2919/5880/2833/6772/2268/6348/6361/5473/9547/6347/5293/409/2793/6374/23533/3717/6387/113/6368/2921/10344/6355/54331/5336/3718/4067/58191/9844/643/6362/57580/7454/408/146850/10235/2870/6356/6376/3576/109/4792/5330/6773/2771/157/6357/2920
hsa04380	Osteoclast differentiation	126	0.763489	2.10941	0.00111483	0.00678705	0.00502502	1859	tags=42%, list=9%, signal=38%	3932/2214/3458/4689/10288/695/2213/4688/653361/2215/6688/3937/10859/8600/126014/1436/55423/2209/6772/54/11006/7305/9103/1513/54209/814/3553/9020/5293/2212/8792/5971/23547/11025/2355/2274/79168/5336/11027/4791/7124/140885/9021/4772/4773/3455/10379/4792/7040/8061/6773/1435/1540
hsa04620	Toll-like receptor signaling pathway	99	0.760108	2.05179	0.00115473	0.00678705	0.00502502	2007	tags=39%, list=10%, signal=36%	6373/4283/3627/7096/51311/6351/942/6352/51284/23643/6772/6348/3569/1513/3553/1326/941/5293/3593/7099/6696/3665/7098/7097/929/3654/7124/4615/7187/10333/3455/7100/3576/4792/958/3663/54106/841/148022
hsa04659	Th17 cell differentiation	105	0.757763	2.06947	0.0011325	0.00678705	0.00502502	1731	tags=39%, list=9%, signal=36%	3561/3932/50615/919/3560/3126/3458/916/917/915/7535/3112/3570/3108/3113/6772/3569/3559/3115/27040/3117/3553/3111/3662/30009/920/3594/3122/3717/3127/3123/3718/4794/3566/3119/9466/4772/4773/4792/7040/51561
hsa04662	B cell receptor signaling pathway	80	0.755855	1.99657	0.00121065	0.00678705	0.00502502	2642	tags=48%, list=13%, signal=41%	973/971/1380/930/10288/7409/695/2213/27071/10859/5579/5880/11006/5293/118788/3635/23547/84433/11025/8519/974/79168/5336/4794/11027/4067/5777/4772/4773/4792/10892/2885/4775/4893/25780/6850/4790/5970
hsa04650	Natural killer cell mediated cytotoxicity	124	0.75501	2.07926	0.00112108	0.00678705	0.00502502	2666	tags=43%, list=13%, signal=37%	3002/3932/2214/3683/919/3458/7409/3823/3821/7535/4277/962/2215/3689/3937/4068/2207/5579/5880/3824/5551/7305/27040/8743/5293/356/10870/5336/7124/3383/5777/4772/3133/3135/3812/4773/3455/3106/3107/836/100132285/3803/1437/6452/2885/4893/259197/6850/3105/115653/53358/3810/51744
hsa04145	Phagosome	144	0.750585	2.08765	0.00110497	0.00678705	0.00502502	1689	tags=36%, list=8%, signal=33%	4973/2214/3126/4689/2213/4688/11151/715/3112/653361/2215/3689/8685/338382/1536/81035/3108/6891/7058/6890/2209/3113/64581/3115/347733/9103/3117/4481/3111/1311/2212/3122/3134/3684/718/4360/7099/3127/3123/7057/7097/3673/929/1520/3119/7280/3133/3135/10333/3106/10312/3107
hsa05133	Pertussis	73	0.741633	1.93896	0.00123457	0.00678705	0.00502502	2163	tags=47%, list=11%, signal=42%	716/3394/715/834/3689/3659/713/717/714/712/23643/3569/3553/3593/6374/3684/718/710/7099/29108/929/3654/7124/840/4615/3576/51561/114548/836/2771/148022/3678/3586/721
hsa04660	T cell receptor signaling pathway	101	0.734734	1.98991	0.00115207	0.00678705	0.00502502	2244	tags=36%, list=11%, signal=32%	3702/10125/3932/29851/919/3458/916/7409/925/5788/917/915/7535/3937/1493/27040/940/9020/1326/5293/920/84433/4794/7124/5777/4772/4773/4792/5133/10892/959/3586/1437/2885/4775/4893
hsa05164	Influenza A	164	0.734145	2.06956	0.00107991	0.00678705	0.00502502	2366	tags=40%, list=12%, signal=35%	3627/3126/3458/6352/3112/834/51284/4600/5579/3108/3113/6772/4938/3569/3115/3117/8743/4939/6347/3553/3111/5293/3593/90865/3122/3717/4261/356/7099/3127/29108/3606/3123/3665/4940/4599/7098/91543/3119/7124/3383/9021/64135/4615/23586/7187/3455/10379/578/3576/4792/5371/3838/6773/114548/836/7177/841/3109/148022/7113/64499/1021/56649/7297
hsa04668	TNF signaling pathway	112	0.733228	2.00349	0.00113895	0.00678705	0.00502502	2146	tags=39%, list=11%, signal=35%	3627/330/8809/6352/4318/6364/64127/7128/3659/7412/2919/3569/197259/6401/7185/6347/3553/9020/1326/5293/7188/7133/6374/2921/602/7124/3383/9021/840/7187/4323/6376/90993/4792/4049/5743/1435/9252/836/1906/841/2920/11035/1437
hsa05152	Tuberculosis	175	0.73254	2.08744	0.00105932	0.00678705	0.00502502	2157	tags=37%, list=11%, signal=33%	2214/7096/3126/3458/2213/4046/11151/64127/3112/2215/3689/3587/2207/3108/2209/3113/6772/64581/3569/3115/9103/3117/3553/3111/3687/3593/1378/2212/3122/3684/3717/4261/972/718/4360/7099/3127/7421/3606/3123/7097/7043/929/1379/3654/1520/3119/7124/8877/4615/10333/10312/7040/51561/8767/10892/836/54106/841/3109/26253/5993/3586/30835
hsa05235	PD-L1 expression and PD-1 checkpoint pathway in cancer	88	0.726058	1.93263	0.00118203	0.00678705	0.00502502	2244	tags=35%, list=11%, signal=31%	10125/3932/919/3458/916/116071/917/915/7535/55509/10538/6772/27040/940/29126/5293/920/3717/7099/7097/4794/5777/4772/4615/4773/4792/5133/54106/148022/4775/4893
hsa05145	Toxoplasmosis	108	0.725739	1.98166	0.00113895	0.00678705	0.00502502	2122	tags=41%, list=10%, signal=37%	3126/330/3458/5294/1234/3112/3587/3310/240/3108/23643/3113/6772/3115/3117/3111/3593/23533/3122/3717/4261/7099/3127/3123/7097/7043/3654/3119/7124/3908/3949/4615/10105/146850/3918/4792/7040/958/959/836/2771/841/3109/3586
hsa05169	Epstein-Barr virus infection	197	0.722775	2.06374	0.00105485	0.00678705	0.00502502	2642	tags=40%, list=13%, signal=35%	3627/3683/864/1380/919/930/3126/916/695/917/915/7128/3112/890/3108/6891/6890/3113/6772/4938/3569/3115/3117/4939/9020/3111/5293/7188/3122/3134/5971/3127/3123/4616/3665/4940/2208/7097/8900/5336/3718/3654/4794/4067/4791/3119/7124/3383/3133/4615/23586/3135/9636/7187/3455/10379/6892/578/9134/3106/4609/3107/4792/958/6773/836/841/3109/10912/1021/7297/567/6850/3105/10018/4790/3516/7157/5970
hsa04621	NOD-like receptor signaling pathway	170	0.717566	2.03319	0.00107181	0.00678705	0.00502502	2366	tags=34%, list=12%, signal=30%	115362/9447/330/6352/115361/9051/64127/7128/834/5027/2634/1536/2633/2919/114769/6772/4938/51393/3569/4939/6347/3553/837/7188/3428/7099/58484/29108/3606/199713/3665/2921/4940/118429/7124/7226/10135/4615/7187/3455/10379/22861/3576/838/4792/5330/6773/8767/22900/114548/841/2920/148022/11035/2635/3708/7297
hsa04623	Cytosolic DNA-sensing pathway	59	0.717287	1.83894	0.00128041	0.00678705	0.00502502	2673	tags=34%, list=13%, signal=30%	3627/9447/6351/6352/834/3569/81030/3553/90865/29108/3606/3665/23586/115004/4792/11035/4790/11277/5970/661
hsa04657	IL-17 signaling pathway	93	0.714993	1.92381	0.00116144	0.00678705	0.00502502	2146	tags=33%, list=11%, signal=30%	3627/3458/4318/6364/7128/2919/6279/6361/3569/6280/6347/3553/4322/7188/6374/2921/4312/7124/3934/7187/6356/3576/23765/4792/8061/5743/836/6278/841/2920/1437
hsa04514	Cell adhesion molecules	141	0.703231	1.95523	0.00110254	0.00678705	0.00502502	2025	tags=39%, list=10%, signal=35%	201633/914/29851/3683/3126/6402/925/5788/942/3676/3112/3689/1462/7412/6614/3108/3113/3115/1493/6401/6403/3117/940/29126/6404/3111/941/920/3122/3134/3684/3127/3695/3123/9071/3119/79679/3383/80380/3133/3135/10666/9019/923/57502/3385/5010/3106/6382/3107/958/5133/959/3109/4267
hsa05146	Amoebiasis	101	0.696582	1.88658	0.00115207	0.00678705	0.00502502	2223	tags=40%, list=11%, signal=35%	3458/913/3689/910/909/338382/2769/911/5579/2919/3569/7850/3553/5293/3593/1277/3684/1278/7099/5272/1281/2921/7097/7043/929/912/7124/3908/3918/3576/6317/5330/7040/836/2920/3586/87/1437/3554/2335
hsa05142	Chagas disease	100	0.691179	1.87014	0.0011534	0.00678705	0.00502502	2122	tags=36%, list=10%, signal=32%	919/3458/916/917/6352/915/713/2769/714/712/6348/3569/6347/3553/5293/3593/356/718/7099/5054/7097/7043/3654/7124/4615/10333/3576/4792/5330/7040/5521/2771/54106/841/148022/3586
hsa05162	Measles	135	0.686597	1.90587	0.00110497	0.00678705	0.00502502	2918	tags=40%, list=14%, signal=34%	3561/3560/916/917/2213/915/7128/3310/51284/4600/6504/6772/4938/3569/3559/940/4939/3553/5293/3593/356/7099/3665/4940/4599/7097/3718/3654/64135/4615/23586/7187/3455/10379/578/9134/4792/6773/836/54106/841/30835/1021/7297/4790/7157/5970/6774/598/103/3552/317/898/6776
hsa00603	Glycosphingolipid biosynthesis - globo and isoglobo series	14	0.681943	1.36782	0.111304	0.319268	0.23638	2231	tags=50%, list=11%, signal=45%	6489/26301/2717/2524/6483/10317/4668
hsa05166	Human T-cell leukemia virus 1 infection	216	0.6791	1.94063	0.00105263	0.00678705	0.00502502	3201	tags=42%, list=16%, signal=35%	3561/3932/3683/3560/3126/916/917/915/4316/991/3112/3689/6688/890/3108/3113/3569/3559/3115/3117/7850/701/3601/9020/3111/5293/920/3122/3134/5971/113/3127/3123/4085/8900/7043/3718/9133/4791/3119/7124/3383/1029/1030/4772/3133/3135/4773/9134/3106/8379/4609/90993/109/3107/4792/7040/4049/8061/958/1111/3109/9700/1437/4775/3554/4893/2113/472/9232/11200/567/3105/4790/4487/7157/5970/8829/598/898/148327/6776…
hsa05221	Acute myeloid leukemia	67	0.67349	1.75526	0.00125	0.00678705	0.00502502	3081	tags=43%, list=15%, signal=37%	597/11040/6688/890/1436/2209/5292/5293/3684/1978/2322/8900/929/1050/4609/5371/83439/861/1437/2885/4893/51176/3815/4790/5970/6774/6776/6199/1147
hsa04625	C-type lectin receptor signaling pathway	102	0.664075	1.79961	0.00115075	0.00678705	0.00502502	2734	tags=39%, list=13%, signal=34%	4046/6367/834/3659/2207/6772/6361/64581/3569/3553/9020/5293/3593/5971/29108/5336/602/4791/7124/4772/4773/10379/4792/51561/6773/5743/1540/10892/114548/841/26253/3586/30835/4775/4893/3708/6850/4790/5970/53342
hsa04630	JAK-STAT signaling pathway	160	0.65859	1.85481	0.00108108	0.00678705	0.00502502	2918	tags=34%, list=14%, signal=30%	3561/50615/3575/1439/3560/3458/3574/1438/3587/3570/116379/6775/6772/5292/3569/3559/3601/5293/9180/3593/3594/3717/5156/3718/1441/3566/9466/5777/3595/9021/3455/10379/4609/51561/3563/6773/338376/3586/1437/3589/2885/5008/3588/7297/59067/11009/1154/4170/3598/53342/3976/316/6774/598/6776
hsa05171	Coronavirus disease - COVID-19	217	0.653713	1.86918	0.00105153	0.00678705	0.00502502	2163	tags=26%, list=11%, signal=23%	3627/716/51311/715/834/728/713/51284/717/4600/3570/1536/719/5579/714/712/6772/4938/3569/6403/629/4939/6347/3553/5293/730/3593/2162/2212/718/7099/4940/4599/7098/7097/4312/5336/3654/7124/64135/4615/23586/9636/7187/59272/3455/10379/115004/3576/4792/6773/114548/1675/7113/1437/721
hsa05135	Yersinia infection	135	0.639809	1.77599	0.00110497	0.00678705	0.00502502	2642	tags=35%, list=13%, signal=30%	3932/2533/7409/925/7535/3676/834/3937/5880/7456/3569/27040/6347/3553/5293/920/2212/7099/58484/29108/3606/3654/7124/9844/391/8395/4772/4615/7454/10095/4773/3576/4792/8935/114548/148022/3678/3586/4775/2335/10109/9138/6195/4790/10096/9815/5970
hsa04664	Fc epsilon RI signaling pathway	65	0.637194	1.6488	0.00508259	0.0234086	0.0173313	2469	tags=31%, list=12%, signal=27%	7409/695/3937/2207/240/241/5880/27040/5293/3635/5336/4067/7124/5321/2205/1437/2885/4893/8605/6850
hsa04666	Fc gamma R-mediated phagocytosis	94	0.63611	1.7111	0.00116009	0.00678705	0.00502502	3071	tags=38%, list=15%, signal=33%	2214/7409/3055/5788/2213/653361/2215/5579/5880/2209/27040/5293/2212/3635/4082/5336/4067/8877/8395/7454/10095/5321/85477/50807/274/5338/7408/10109/8605/6850/10096/55616/10097/1785/6199/5337
hsa04670	Leukocyte transendothelial migration	109	0.634232	1.73404	0.00113507	0.00678705	0.00502502	2135	tags=27%, list=10%, signal=24%	3702/399/3683/4689/7409/4688/3676/4318/7852/653361/3689/1536/7412/5579/5880/5293/3684/6387/7294/9071/5336/3383/83593/5010/6494/2771/4267/4313/87
hsa04215	Apoptosis - multiple species	31	0.628125	1.45912	0.0461761	0.158943	0.117679	2899	tags=35%, list=14%, signal=30%	330/5366/666/332/840/578/836/841/10018/598/317
hsa04210	Apoptosis	134	0.627344	1.74014	0.00110742	0.00678705	0.00502502	3145	tags=37%, list=15%, signal=32%	3002/1439/330/597/1521/4001/5551/1513/7185/8743/9020/5366/5293/356/332/4616/1520/7124/840/1075/578/4792/1522/3563/84823/836/841/142/10912/4893/3708/472/7277/7278/7846/1514/10018/1509/4790/7157/5970/4170/84790/598/317/8797/1147/10376/1616/843
hsa04217	Necroptosis	127	0.626353	1.73216	0.00111235	0.00678705	0.00502502	2963	tags=31%, list=15%, signal=26%	330/3458/7128/834/1536/6775/6772/197259/81030/8743/3553/90865/7188/3717/356/7099/29108/7098/5836/3718/7124/3455/10379/5321/6773/1540/114548/841/148022/11035/142/8605/7297/353376/6774/3552/6776/8797/2752
hsa05167	Kaposi sarcoma-associated herpesvirus infection	190	0.625725	1.78312	0.00106045	0.00678705	0.00502502	3392	tags=39%, list=17%, signal=33%	3055/942/5294/1234/4277/1230/2919/6772/3569/5293/2793/23533/3134/3717/718/3665/2921/131450/9976/7098/2247/54331/5336/4067/3383/4772/3133/57580/146850/3135/7187/4773/3455/10379/578/3106/3576/4609/3107/4792/6773/5743/836/83439/841/2920/148022/1437/59345/4775/4893/51176/1021/3708/1233/7297/6850/3105/94235/4790/7157/5970/6774/1870/1147/3459/285/9261/1026/5608/1237/6932/51806/3661
hsa03050	Proteasome	45	0.624412	1.54887	0.0198939	0.0774441	0.0573383	5497	tags=47%, list=27%, signal=34%	3458/5698/5699/5696/5721/5720/5713/11047/5707/5685/5688/9491/10213/23198/5709/5682/5710/5704/5717/5708/5691
hsa04115	p53 signaling pathway	73	0.624031	1.6315	0.00493827	0.0230688	0.0170797	3463	tags=47%, list=17%, signal=39%	6241/2810/5366/3479/5054/4616/7057/983/51512/9133/1029/55240/9540/9134/891/836/1111/841/5268/10912/1021/83667/472/11200/7157/3732/598/317/898/8797/1026/4193/55367/84883
hsa05170	Human immunodeficiency virus 1 infection	206	0.622892	1.77614	0.00105597	0.00678705	0.00502502	2642	tags=29%, list=13%, signal=25%	919/916/200315/917/915/1234/7852/684/9582/5579/6891/5880/6890/25939/5293/7188/7133/920/2793/3134/356/7099/7097/983/54331/5336/3654/9133/7124/60489/4772/3133/4615/3135/27350/4773/6892/578/115004/891/3106/3107/4792/8905/836/2771/1111/841/59345/4775/8907/4893/3708/472/567/3105/94235/4790/5970
hsa05163	Human cytomegalovirus infection	219	0.609513	1.74435	0.00104712	0.00678705	0.00502502	2642	tags=31%, list=13%, signal=27%	6351/6352/1234/7852/3587/3579/3570/1230/5579/6891/5880/6890/6348/3569/5732/6347/3553/5293/7188/2793/3134/356/6387/113/1978/5156/54331/7124/1029/4772/3133/3135/4773/6892/578/115004/6376/3106/3576/4609/90993/109/3107/4792/5330/5743/5734/836/2771/841/59345/2885/10672/4775/3554/4893/1021/3588/3708/9138/2768/567/3105/94235/4790/7157/5970
hsa01523	Antifolate resistance	30	0.604761	1.3939	0.0773723	0.243276	0.180118	3549	tags=57%, list=17%, signal=47%	3569/3553/8836/7298/7124/2350/10257/10057/4363/4790/5970/1147/2356/2352/6472/6573/8517
hsa04611	Platelet activation	122	0.603146	1.65747	0.00112486	0.00678705	0.00502502	2330	tags=27%, list=11%, signal=24%	10125/695/5294/83706/54518/3937/2207/5742/64805/5293/6916/1277/23533/2212/1278/113/1281/3673/5336/4067/146850/10235/109/5023/5330/5321/2771/2811/10672/7408/3708/8605/9138
hsa05202	Transcriptional misregulation in cancer	170	0.60246	1.70704	0.00107181	0.00678705	0.00502502	2305	tags=29%, list=11%, signal=26%	3002/3560/330/597/942/64919/5079/4318/51513/6688/890/1436/2209/3569/7850/7185/8842/3479/3684/3695/4616/2322/8900/929/2313/5966/4211/51804/1050/578/604/3248/55589/5328/6495/3576/4609/5371/2120/958/2530/861/5327/7113/1437/4066/10912/85414/472
hsa00380	Tryptophan metabolism	42	0.600496	1.46657	0.037889	0.136151	0.100804	341	tags=12%, list=2%, signal=12%	3620/26/259307/8564/8942
hsa05203	Viral carcinogenesis	162	0.597828	1.68855	0.00107411	0.00678705	0.00502502	3983	tags=44%, list=20%, signal=36%	1234/991/890/7185/5366/5293/7188/3134/718/3665/8900/983/3718/4067/4791/1029/1030/3133/5966/3135/7187/10379/578/9134/3106/8379/90993/3107/4792/836/85477/1111/841/5315/87/2885/4893/7533/1021/5922/1233/7532/6850/3105/4790/3516/7157/5970/6672/6774/898/148327/6776/55697/9114/9261/1026/4193/1237/5567/3661/8517/8841/8717/9759/27044/2960/3716/5610/6722/468
hsa00770	Pantothenate and CoA biosynthesis	21	0.590541	1.29292	0.169985	0.44468	0.329234	1727	tags=19%, list=8%, signal=17%	8875/586/8876/217
hsa04110	Cell cycle	123	0.589997	1.62284	0.00112486	0.00678705	0.00502502	2932	tags=37%, list=14%, signal=32%	991/890/7272/2810/701/4616/4085/990/699/8900/7043/983/8317/9133/10926/1029/1030/8318/4174/994/9134/5347/891/8379/23594/4609/4175/7040/1111/9700/993/10912/7533/1021/472/4173/9232/11200/7532/10459/7157/5111/1032/898/1870
hsa00100	Steroid biosynthesis	20	0.58302	1.26428	0.201238	0.491082	0.363589	3314	tags=40%, list=16%, signal=34%	1591/3930/6646/6713/3988/1718/4047/1594
hsa05161	Hepatitis B	161	0.580568	1.6371	0.00107759	0.00678705	0.00502502	3201	tags=33%, list=16%, signal=28%	4318/890/5579/6775/6772/3569/5293/3717/356/7099/332/3665/7098/7097/8900/7043/3718/3654/7124/64135/4772/4615/23586/7187/4773/9134/3576/4609/90993/4792/7040/6773/836/841/148022/2885/4775/4893/7297/353376/4790/7157/5970/5111/6774/317/898/148327/6776/1870/1147/843/1026
hsa04950	Maturity onset diabetes of the young	25	0.571559	1.30314	0.156295	0.415517	0.307641	72	tags=4%, list=0%, signal=4%	168620
hsa04622	RIG-I-like receptor signaling pathway	68	0.565126	1.47613	0.0198511	0.0774441	0.0573383	3674	tags=35%, list=18%, signal=29%	3627/3593/3665/54941/7124/64135/79132/23586/9636/7187/3576/4792/338376/1540/841/4790/5970/1147/843/3661/8517/3592/8717/55593
hsa05219	Bladder cancer	41	0.556869	1.3568	0.0802721	0.24999	0.185089	3310	tags=44%, list=16%, signal=37%	4318/1890/7057/4312/1029/1612/3576/4609/9252/11186/4313/4893/1613/7157/1870/1839/1026/4193
hsa05132	Salmonella infection	245	0.556541	1.60585	0.00103306	0.00678705	0.00502502	3659	tags=34%, list=18%, signal=28%	399/330/5788/3071/5294/834/338382/23643/3569/197259/347733/8743/3553/837/5293/27128/7099/58484/29108/3606/7097/929/3654/7124/9844/391/840/7280/4615/6281/10095/10333/7100/578/2318/3576/4609/838/4792/8767/114548/836/83439/54106/841/5898/11035/5216/51176/7277/10109/7278/3798/7846/26999/4790/10096/5970/2316/203068/84790/10097/9267/1785/8797/10381/1147/10376/57617/55770/5585/64837/60/5608/4671/6932/30…
hsa03030	DNA replication	36	0.553608	1.32434	0.104762	0.303193	0.224479	4478	tags=53%, list=22%, signal=41%	2237/4174/4175/1763/5424/4173/5984/5427/5111/5426/5558/10535/4171/4172/4176/5985/23649/5557/29935
hsa00590	Arachidonic acid metabolism	57	0.552638	1.41587	0.0548469	0.179349	0.132787	2325	tags=26%, list=11%, signal=23%	5320/26279/5730/240/5742/6916/5740/27306/9536/247/5321/5743/4048/493869/8605
hsa04218	Cellular senescence	156	0.54788	1.53825	0.00217155	0.0104426	0.00773153	3381	tags=33%, list=17%, signal=28%	890/2305/3569/5293/4605/3134/1978/5054/4616/8900/7043/983/9133/1029/1030/83593/4772/3133/3135/4773/9134/891/3106/3576/4609/3107/7040/1111/993/4775/10912/4893/1021/2113/3708/472/11200/3105/3805/4790/7157/5970/59341/3552/898/1870/292/9261/1026/4193/5608/51806
hsa04066	HIF-1 signaling pathway	107	0.546589	1.4925	0.0113379	0.0481491	0.0356488	3201	tags=30%, list=16%, signal=25%	3458/3101/3570/1536/5579/5163/3569/5293/3479/3162/7099/1978/5054/5336/112399/8569/1906/2026/3948/3939/4790/5970/7037/3098/6774/7018/80201/5230/6199/3459/285/1026
hsa04974	Protein digestion and absorption	96	0.544218	1.46853	0.0126874	0.0531896	0.0393807	2189	tags=28%, list=11%, signal=25%	1301/1300/9056/1289/1277/1290/1293/1278/256076/1281/1292/6546/255631/81578/1303/3783/59272/11136/1294/206358/1291/1306/4311/85301/120103/1359/91522
hsa05130	Pathogenic Escherichia coli infection	189	0.543517	1.54951	0.00106157	0.00678705	0.00502502	3659	tags=39%, list=18%, signal=32%	3071/3059/834/4542/64005/7456/3569/347733/8743/3553/837/2212/356/27128/7099/29108/3606/9071/1902/3654/7124/5777/840/7280/4615/10095/7100/578/5010/3576/4644/10802/4792/9368/114548/836/4627/841/4643/10672/3554/9871/7277/10109/7278/9138/7846/2768/26999/4790/10096/5970/5062/203068/84790/2149/10097/9267/8797/23562/10381/1147/2534/10376/9170/60/4671/10006/382/8517/5063/8717/2846/10092
hsa00520	Amino sugar and nucleotide sugar metabolism	48	0.543309	1.36484	0.0879265	0.26871	0.198948	3956	tags=46%, list=19%, signal=37%	9945/3101/80896/1118/51167/51700/5973/55577/5373/29926/2762/55276/3098/2821/6675/80201/91373/2645/7360/54187/29925/2584
hsa04216	Ferroptosis	40	0.542382	1.31824	0.103401	0.303193	0.224479	3176	tags=30%, list=16%, signal=25%	1536/3162/2182/1356/51703/55240/7157/7037/7018/440738/10533/23305
hsa04933	AGE-RAGE signaling pathway in diabetic complications	100	0.538874	1.45805	0.0138408	0.0572905	0.0424169	2918	tags=36%, list=14%, signal=31%	1536/7412/5579/6772/5292/3569/6401/6347/3553/5293/1277/50507/3717/1278/1281/5054/7043/5336/7124/3383/4772/3576/5330/7040/2152/836/1906/4313/2335/4893/4790/5970/6774/3552/183/6776
hsa00920	Sulfur metabolism	10	0.538623	1.01157	0.494444	0.79647	0.589693	2482	tags=20%, list=12%, signal=18%	9060/23474
hsa04350	TGF-beta signaling pathway	91	0.52828	1.41739	0.0255517	0.0966848	0.0715838	2511	tags=24%, list=12%, signal=21%	26585/3458/3624/1634/7057/57817/7043/7124/10468/1030/2200/4681/4609/8200/7040/25805/4052/2331/654/57154/7050/64750
hsa00052	Galactose metabolism	31	0.528126	1.22682	0.199134	0.491082	0.363589	3978	tags=45%, list=20%, signal=36%	3101/57016/2717/231/8704/55276/3098/2548/80201/2683/2645/7360/2584/130589
hsa05206	MicroRNAs in cancer	165	0.527872	1.48813	0.00648649	0.0290559	0.0215125	3104	tags=30%, list=15%, signal=25%	1591/2146/4318/5579/5292/9493/5293/3162/113130/6624/4082/7057/9839/5156/5336/1029/3371/994/578/54541/9134/5328/4609/5743/1946/9252/836/1786/5268/11186/3678/2885/993/4893/85414/1021/472/3925/4363/10018/6659/4790/7157/4170/6774/898/1870/8626/1788
hsa05160	Hepatitis C	151	0.524047	1.46704	0.00762527	0.0336955	0.0249475	3081	tags=30%, list=15%, signal=25%	3627/3458/4600/6772/4938/4939/5293/356/3665/9071/4940/4599/7098/91543/7124/9021/3949/23586/10062/7187/3455/10379/578/5010/4609/4792/6773/5521/836/841/148022/2885/4893/7533/1021/7297/7532/4790/7157/5970/6774/317/1870/23562/1147
hsa05120	Epithelial cell signaling in Helicobacter pylori infection	70	0.522001	1.36815	0.0742574	0.235749	0.174545	3177	tags=29%, list=16%, signal=24%	6352/3579/2919/9020/2921/1445/5336/4067/10312/3576/4792/836/2920/4790/5970/526/1839/1147/5803/9114
hsa05200	Pathways in cancer	525	0.521832	1.52954	0.001	0.00678705	0.00502502	2642	tags=25%, list=13%, signal=22%	10125/3561/3575/1439/3560/330/3458/3574/1438/11040/4318/7852/6688/890/3570/5579/5880/1436/6775/6772/5292/3569/3559/7185/5732/3601/5366/5293/3593/7188/2793/3479/3594/3717/3162/356/6387/113/332/4616/2323/675/2322/7472/5156/4312/3673/8900/7043/2247/1902/54331/1909/5336/3718/1441/3082/3566/4791/1029/6789/1030/3908/1612/3595/83593/840/112399/10235/81029/7187/3455/3918/1050/5888/578/9134/3576/4609/109/…
hsa03450	Non-homologous end-joining	13	0.521642	1.04439	0.431304	0.750194	0.555431	2761	tags=23%, list=14%, signal=20%	2237/64421/7518
hsa00360	Phenylalanine metabolism	17	0.518681	1.09861	0.360841	0.694089	0.513892	80	tags=6%, list=0%, signal=6%	259307
hsa04512	ECM-receptor interaction	88	0.517781	1.37823	0.035461	0.130289	0.096464	2358	tags=31%, list=12%, signal=27%	3676/3161/7058/1311/3694/1277/1293/1278/256076/3695/6696/7057/5649/3673/1292/3691/3908/3371/3918/6382/1291/2811/3678/3381/8516/2335/7059
hsa03440	Homologous recombination	41	0.516727	1.25899	0.152381	0.408431	0.302395	3003	tags=27%, list=15%, signal=23%	641/675/83990/5888/146956/5424/472/580/11073/8438/29086
hsa00534	Glycosaminoglycan biosynthesis - heparan sulfate / heparin	24	0.512975	1.16512	0.281752	0.602175	0.445841	2930	tags=25%, list=14%, signal=21%	9955/9953/26035/9957/9348/8509
hsa00533	Glycosaminoglycan biosynthesis - keratan sulfate	14	0.509823	1.02259	0.441739	0.756276	0.559934	2686	tags=36%, list=13%, signal=31%	4166/8534/2530/6483/8704
hsa04151	PI3K-Akt signaling pathway	348	0.508141	1.48756	0.00100908	0.00678705	0.00502502	2642	tags=24%, list=13%, signal=22%	3561/8115/3575/3560/930/3574/5294/3676/3570/1436/7058/3569/3559/1311/5293/9180/118788/3694/1277/2793/23533/3479/3717/356/1293/1278/7099/256076/3695/1978/6696/2323/2322/7057/5649/7097/5156/3673/1292/2247/1902/54331/3718/1441/3082/3691/3566/3908/146850/4602/3455/3371/3918/54541/9134/4609/90993/1291/23566/3563/1435/5521/1946/3678/3381/2997/59345/2885/8516/5008/2335/374/4893/7533/1021/6446/7059/3815/…
hsa00500	Starch and sucrose metabolism	32	0.507542	1.1878	0.246439	0.567503	0.42017	3754	tags=41%, list=18%, signal=33%	3101/5836/2997/283209/55276/3098/2821/2548/80201/276/57733/2645/7360
hsa04370	VEGF signaling pathway	57	0.493768	1.26504	0.149235	0.403304	0.298599	2325	tags=19%, list=11%, signal=17%	9047/5579/5880/5293/5336/8877/4773/5321/5743/4893/8605
hsa00601	Glycosphingolipid biosynthesis - lacto and neolacto series	27	0.492128	1.12488	0.316092	0.642	0.475326	3822	tags=44%, list=19%, signal=36%	6489/2526/2524/10317/84002/10331/2525/2651/8704/2683/6484/2529
hsa04142	Lysosome	128	0.484526	1.34048	0.0489433	0.166432	0.123223	3047	tags=27%, list=15%, signal=23%	1521/1510/27074/7805/9476/968/54/1513/4125/2760/1520/58511/1075/10312/2717/1522/8905/411/5476/3988/53/8907/4668/51172/9583/6556/1514/1200/1509/57192/1497/2548/5641/9516
hsa00120	Primary bile acid biosynthesis	17	0.483635	1.02438	0.453074	0.767912	0.568549	1402	tags=18%, list=7%, signal=16%	9023/1593/80270
hsa05222	Small cell lung cancer	92	0.482875	1.29506	0.104773	0.303193	0.224479	3201	tags=34%, list=16%, signal=29%	330/7185/5293/7188/4616/3673/1030/3908/7187/3918/578/9134/4609/4792/5743/1164/836/2335/10912/1021/4790/7157/5970/598/317/898/1870/3675/1147/3685/1026
hsa05212	Pancreatic cancer	76	0.481834	1.26654	0.133578	0.370171	0.274068	3201	tags=34%, list=16%, signal=29%	5880/6772/9459/5293/4616/675/7043/1029/5888/578/7040/5900/5898/10912/5338/1021/4790/7157/5970/6774/598/1870/6199/5337/1147/1026
hsa05131	Shigellosis	225	0.47437	1.36126	0.0145682	0.0595473	0.0440878	4036	tags=32%, list=20%, signal=26%	6352/3059/834/23157/3101/3553/837/5293/7188/27128/718/7099/58484/29108/3606/929/5336/7124/9844/4615/10095/55062/7100/115004/3576/4792/5330/8767/10892/9252/114548/7321/10318/3678/87/1437/3554/5216/3708/472/10109/4790/10096/7157/5970/3098/598/10097/9267/80201/6199/23048/1147/1729/60/4193/4671/10801/3661/57521/382/8517/55054/8717/10092/10627/55072/5333/7335/10094/8737/25851/10616
hsa03460	Fanconi anemia pathway	49	0.474334	1.19481	0.223958	0.534557	0.395777	2369	tags=18%, list=12%, signal=16%	641/55215/675/83990/5888/29089/116028/146956/2175
hsa05205	Proteoglycans in cancer	201	0.473019	1.3501	0.0211193	0.0812473	0.0601541	2399	tags=21%, list=12%, signal=19%	7409/3059/4318/5579/4060/5329/5293/3593/1277/7291/3479/356/10855/1278/7099/1634/7057/7472/7097/3673/2247/5336/3082/7124/5777/81029/287/2318/5328/6382/4609/7040/11211/836/2535/3678/4313/2885/2335/4893/3708/9138/117581
hsa00760	Nicotinate and nicotinamide metabolism	34	0.471848	1.11772	0.327323	0.648695	0.480283	3443	tags=32%, list=17%, signal=27%	952/4837/683/10135/65220/23475/316/23057/51547/55191/4860
hsa04392	Hippo signaling pathway - multiple species	28	0.471361	1.0842	0.367288	0.702358	0.520014	3014	tags=29%, list=15%, signal=24%	9770/166824/83937/122786/11186/55233/7004/8463
hsa00670	One carbon pool by folate	19	0.469977	1.00933	0.459375	0.768351	0.568874	1040	tags=16%, list=5%, signal=15%	160428/10797/7298
hsa05230	Central carbon metabolism in cancer	69	0.469696	1.22852	0.180348	0.460733	0.341119	3120	tags=32%, list=15%, signal=27%	3101/8140/5163/9123/5293/2322/5156/3418/9997/57103/4609/3948/3939/5315/4893/3815/5223/7157/6510/3098/80201/3417
hsa05165	Human papillomavirus infection	326	0.469466	1.3727	0.00406091	0.0192452	0.0142488	3392	tags=28%, list=17%, signal=24%	3676/3659/890/4600/7058/6772/1311/5293/3694/1277/3134/8638/356/1293/1278/256076/3695/1978/6696/7057/4599/5649/7472/7098/3673/8900/1292/4242/3691/7124/3908/3133/3135/9636/3955/81029/7187/3455/10379/3371/3918/578/9134/3106/10312/90993/3107/1291/9368/6773/5743/11211/5521/5734/836/83439/841/148022/2535/3678/3381/5315/2885/8516/2335/4893/1021/472/7059/7297/3105/4790/3516/7157/5970/526/898/148327/3675/…
hsa05220	Chronic myeloid leukemia	76	0.468838	1.23238	0.171569	0.445261	0.329664	4490	tags=45%, list=22%, signal=35%	5293/4616/7043/1029/578/4609/4792/7040/861/2885/10912/4893/1021/2122/53358/4790/7157/5970/598/6776/1870/1147/1026/4193/8517/9846/6464/6654/867/399694/5925/1027/3551/1643
hsa00051	Fructose and mannose metabolism	33	0.468126	1.1068	0.337517	0.664869	0.492258	2972	tags=33%, list=15%, signal=29%	3101/57016/2203/57103/5373/29926/231/2762/3098/5210/80201
hsa04144	Endocytosis	243	0.463406	1.33603	0.016546	0.0667969	0.0494553	3689	tags=29%, list=18%, signal=24%	3561/3560/1234/7852/3310/3579/7456/3559/409/3134/27128/5156/9744/1601/8395/30011/11031/3949/3133/408/3135/10095/2870/3106/2350/3107/5371/64744/157/50807/30845/274/4218/5338/10109/3798/156/57154/3105/64750/10096/9815/7037/55616/10938/55738/11021/10097/9267/1785/161/832/1759/5337/80223/868/23325/91782/58533/4193/29924/2352/1175/2869/382/829/9922/3312/10092/84440
hsa04928	Parathyroid hormone synthesis, secretion and action	105	0.461844	1.26131	0.127973	0.357668	0.264811	3685	tags=33%, list=18%, signal=27%	1591/8600/5579/409/4322/113/7421/9935/5142/408/4323/90993/109/5330/9368/2771/10672/5338/3708/9138/2768/2625/64386/4205/148327/1839/2773/5337/1026/1594/5567/4209/10568/5578/6667
hsa01210	2-Oxocarboxylic acid metabolism	18	0.460469	0.981315	0.486486	0.791448	0.585975	1212	tags=11%, list=6%, signal=10%	586/3418
hsa05410	Hypertrophic cardiomyopathy	90	0.460086	1.23086	0.166082	0.437974	0.324269	3431	tags=30%, list=17%, signal=25%	3676/3569/489/3694/3479/3695/3673/7043/3691/7124/6546/7171/3908/7040/784/1906/55799/3678/8516/70/183/3675/22801/3685/7169/60/7170
hsa00532	Glycosaminoglycan biosynthesis - chondroitin sulfate / dermatan sulfate	20	0.457408	0.991893	0.472136	0.773593	0.572755	3650	tags=45%, list=18%, signal=37%	50515/29940/337876/54480/22856/55454/9469/55501/64131
hsa00604	Glycosphingolipid biosynthesis - ganglio series	15	0.455087	0.932314	0.559265	0.858591	0.635686	2050	tags=20%, list=10%, signal=18%	6489/6483/81849
hsa04810	Regulation of actin cytoskeleton	216	0.455027	1.30031	0.0442105	0.153796	0.113868	3233	tags=24%, list=16%, signal=20%	3683/7409/3071/3676/7852/3689/5880/9459/3687/5293/3694/3684/89846/6387/3695/5156/3673/2247/1902/3691/8395/10095/1730/5305/81624/85477/4627/3678/87/8516/10672/2335/5216/4893/2245/10109/9138/2768/26999/10096/5062/2149/85464/10097/221178/3675/22801/3685/3681/9170/1729
hsa00240	Pyrimidine metabolism	53	0.45488	1.15425	0.266234	0.584285	0.432595	2571	tags=19%, list=13%, signal=17%	6241/1890/7083/7298/129607/7371/1503/1633/9583/318
hsa04914	Progesterone-mediated oocyte maturation	89	0.453528	1.2097	0.189635	0.477005	0.353166	2454	tags=24%, list=12%, signal=21%	890/6790/5293/3479/6793/113/4085/699/8900/983/9133/994/5347/891/8379/109/2771/5140/993/6195/10459
hsa04015	Rap1 signaling pathway	208	0.452627	1.29344	0.0493697	0.166432	0.123223	2836	tags=23%, list=14%, signal=20%	3683/2533/7409/3689/8631/54518/3937/5579/5880/1436/2357/27040/136/5293/3479/3684/113/51466/7057/5156/2247/1902/3082/83593/10235/135/109/6494/5330/23566/1435/1946/5900/2771/5898/51735/5216/4893/7408/3815/25780/9855/2889/1268/2149/25865/23683
hsa04510	Focal adhesion	200	0.450028	1.28477	0.0601266	0.192904	0.142823	2358	tags=20%, list=12%, signal=18%	330/7409/3676/5579/64098/5880/7058/1311/5293/3694/1277/3479/1293/1278/256076/3695/6696/7057/29780/5649/5156/3673/1292/3082/3691/3908/8395/7791/3371/3918/2318/1291/3678/3381/87/2885/8516/2335/7408/7059
hsa00592	alpha-Linolenic acid metabolism	22	0.449135	0.994639	0.490937	0.794734	0.588408	2325	tags=23%, list=11%, signal=20%	5320/26279/5321/9415/8605
hsa00250	Alanine, aspartate and glutamate metabolism	35	0.445103	1.06079	0.39863	0.711743	0.526962	218	tags=6%, list=1%, signal=6%	259307/9945
hsa05418	Fluid shear stress and atherosclerosis	135	0.443324	1.23059	0.141436	0.385414	0.285354	3388	tags=28%, list=17%, signal=24%	3458/4688/4318/653361/7412/5880/6401/7850/6347/3553/5293/3162/7124/3383/6382/1906/5327/4313/3554/5175/1514/4790/7157/5970/59341/1535/4205/3552/10365/2817/1147/3685/7056/2949/60/5608/51806/658
hsa04970	Salivary secretion	85	0.442927	1.17374	0.232975	0.545254	0.403697	1723	tags=15%, list=8%, signal=14%	952/1469/4069/5579/154/113/1472/683/1470/3778/3783/109/5330
hsa04750	Inflammatory mediator regulation of TRP channels	96	0.441291	1.19079	0.200692	0.491082	0.363589	2325	tags=19%, list=11%, signal=17%	5579/51393/5732/3553/5293/3479/113/3357/5336/3269/109/5330/5321/2150/5734/3554/3708/8605
hsa01524	Platinum drug resistance	70	0.438656	1.14971	0.262376	0.57971	0.429207	3310	tags=26%, list=16%, signal=22%	330/7153/5366/5293/356/332/1029/578/836/841/1317/472/7157/598/317/1026/2949/4193
hsa04917	Prolactin signaling pathway	70	0.437742	1.14731	0.268564	0.584728	0.432923	2918	tags=21%, list=14%, signal=18%	3659/8600/6772/5293/3717/8792/9021/2885/4893/53358/4790/1154/5970/6774/6776
hsa04540	Gap junction	85	0.433128	1.14777	0.270012	0.584728	0.432923	3093	tags=27%, list=15%, signal=23%	5579/347733/113/3357/5156/983/1902/7280/109/5330/2771/2885/4893/3708/7277/7278/7846/2982/203068/84790/10381/2773/10376
hsa05223	Non-small cell lung cancer	72	0.43233	1.1311	0.2866	0.606081	0.448732	2932	tags=28%, list=14%, signal=24%	5579/5293/4616/5336/3718/3082/1029/6789/83593/578/11186/2885/10912/4893/1021/3798/7157/6774/6776/1870
hsa05100	Bacterial invasion of epithelial cells	77	0.431887	1.1365	0.287286	0.606081	0.448732	4180	tags=31%, list=21%, signal=25%	3059/1731/23157/5293/9844/391/10095/3678/2335/10109/10459/53358/10096/10097/1785/1759/60/10801/10092/6464/10094/867/399694/55964
hsa04072	Phospholipase D signaling pathway	145	0.431204	1.20073	0.174201	0.448532	0.332086	3085	tags=28%, list=15%, signal=24%	5294/3579/2207/1606/5293/23533/27128/113/5156/1902/5336/8877/8395/146850/3576/109/5330/8525/23566/5321/5900/2205/5898/2885/10672/4893/5338/8605/3815/2768/56895/6850/53358/2149/5737/9267/1785/183/1759/5337/2534
hsa04068	FoxO signaling pathway	128	0.430376	1.19067	0.186874	0.473705	0.350723	3310	tags=25%, list=16%, signal=21%	3575/3569/8743/5293/6648/3479/356/4616/7043/9133/6789/1030/604/5347/891/7040/10733/8698/3586/2885/10912/4893/6446/472/10018/1032/6774/10365/1147/1026/114907/4193
hsa01521	EGFR tyrosine kinase inhibitor resistance	78	0.429295	1.13214	0.301703	0.626232	0.463652	3052	tags=26%, list=15%, signal=22%	3570/5579/3569/5293/3479/3717/1978/5156/2247/5336/3082/558/2885/4893/10018/53358/6774/598/2621/6199
hsa05214	Glioma	75	0.427292	1.12225	0.302583	0.626232	0.463652	3381	tags=27%, list=17%, signal=22%	5579/814/5293/3479/4616/5156/5336/1029/578/2885/10912/4893/1021/57118/53358/7157/1870/1026/4193/51806
hsa04080	Neuroactive ligand-receptor interaction	334	0.425626	1.24273	0.0436548	0.153496	0.113646	2186	tags=12%, list=11%, signal=11%	2359/5026/27334/3001/53829/150/5367/728/5027/719/5724/10800/154/2357/5732/136/286530/718/5031/2151/3357/9934/5729/1902/1909/140/3269/135/5023/23566/2150/8698/5734/1906/9294/5021/2922/1903/10886/51083/1241
hsa05412	Arrhythmogenic right ventricular cardiomyopathy	77	0.424274	1.11647	0.319071	0.644051	0.476844	2258	tags=19%, list=11%, signal=17%	3676/489/3694/3695/1824/3673/3691/6546/3908/784/83439/55799/3678/8516/51176
hsa04014	Ras signaling pathway	227	0.423525	1.21697	0.113306	0.322182	0.238538	2719	tags=21%, list=13%, signal=18%	10125/7535/5320/26279/5579/51365/5880/1436/27040/64926/5293/2793/3479/356/2323/2322/5156/2247/54331/5336/3082/6789/83593/5966/10235/5321/1435/1946/5900/11186/10156/5898/59345/2885/4893/27/5338/2113/8605/5922/3815/25780/94235/53358/4790/5970/5062
hsa00270	Cysteine and methionine metabolism	49	0.421852	1.06262	0.377604	0.709635	0.525402	2117	tags=14%, list=10%, signal=13%	259307/586/6723/10993/1786/3948/3939
hsa05414	Dilated cardiomyopathy	95	0.419771	1.12879	0.293364	0.614937	0.455289	3431	tags=29%, list=17%, signal=25%	3676/489/3694/3479/113/3695/3673/7043/3691/7124/6546/7171/3908/109/7040/784/55799/3678/8516/70/183/3675/22801/3685/7169/60/5567/7170
hsa00790	Folate biosynthesis	26	0.419244	0.953315	0.537226	0.847488	0.627466	1436	tags=19%, list=7%, signal=18%	2643/55034/8836/57016/249
hsa04978	Mineral absorption	56	0.418733	1.07092	0.383439	0.711674	0.526911	3949	tags=25%, list=19%, signal=20%	26872/261729/3162/7421/6546/1317/493/486/7018/9843/4502/10568/2512/483
hsa04010	MAPK signaling pathway	290	0.417048	1.21187	0.0828221	0.255498	0.189167	2719	tags=22%, list=13%, signal=19%	10125/3310/5778/5579/5880/1436/11221/3553/9020/1326/1844/409/3479/356/5971/4616/2323/11184/2322/5156/7043/2247/929/3654/3082/4791/7124/6789/4772/4615/408/10235/994/2318/4609/7040/5321/784/1435/8569/1946/9252/836/55799/2885/4775/3554/374/10912/4893/8605/5922/2122/3815/2768/6195/3925/25780/4790/7157/5970/8986/2316/5062
hsa04913	Ovarian steroidogenesis	48	0.416497	1.04628	0.413386	0.726717	0.538049	2430	tags=19%, list=12%, signal=17%	240/3479/113/3949/109/5321/5743/8605/654
hsa04972	Pancreatic secretion	95	0.41622	1.11925	0.30617	0.62967	0.466197	2388	tags=17%, list=12%, signal=15%	952/5320/26279/5874/5579/489/113/9635/683/3778/109/5330/1359/4218/3708/493
hsa00561	Glycerolipid metabolism	61	0.415087	1.06479	0.394095	0.711743	0.526962	2598	tags=25%, list=13%, signal=22%	196051/1606/57016/150763/2710/11343/2717/217/8525/84513/23175/3990/231/56895/154141
hsa04926	Relaxin signaling pathway	128	0.41033	1.13521	0.261402	0.57971	0.429207	2642	tags=22%, list=13%, signal=19%	4318/2769/5293/409/4322/1277/2793/1278/113/1281/4312/54331/408/90993/109/4792/5330/7040/1906/2771/4313/59345/2885/4893/94235/53358/4790/5970
hsa00830	Retinol metabolism	53	0.409593	1.03934	0.415584	0.726717	0.538049	1845	tags=11%, list=9%, signal=10%	195814/10170/29785/125/1592/7367
hsa05210	Colorectal cancer	86	0.409441	1.08897	0.350711	0.682634	0.50541	3366	tags=28%, list=17%, signal=23%	5880/5366/5293/332/4616/7043/578/4609/7040/5900/836/83439/5898/2885/374/10912/4893/51176/10018/7157/6199/1026/2069/6932
hsa00010	Glycolysis / Gluconeogenesis	65	0.409365	1.05927	0.395172	0.711743	0.526962	4235	tags=37%, list=21%, signal=29%	3101/2203/125/669/217/2026/3948/3939/5315/83440/5223/55276/3098/2821/80201/5230/10327/230/2645/124/130589/5161/226/7167
hsa00565	Ether lipid metabolism	44	0.40898	1.01047	0.468625	0.773593	0.572755	2426	tags=23%, list=12%, signal=20%	5320/26279/5168/79888/122618/7941/5321/5338/8605/255043
hsa04310	Wnt signaling pathway	156	0.406228	1.14054	0.233442	0.545254	0.403697	2258	tags=17%, list=11%, signal=16%	6423/4316/6424/5579/5176/5880/84870/22943/8840/85409/7472/27123/4772/81029/4773/4609/5330/8061/11211/23500/83439/25805/2535/4920/6422/4775/51176
hsa00531	Glycosaminoglycan degradation	19	0.402174	0.863714	0.640625	0.925253	0.685042	1885	tags=11%, list=9%, signal=10%	10855/411
hsa03320	PPAR signaling pathway	74	0.399032	1.04648	0.400491	0.711743	0.526962	1469	tags=15%, list=7%, signal=14%	4973/5360/2182/4312/1593/51703/2171/11001/6319/10062/2710
hsa00591	Linoleic acid metabolism	26	0.398476	0.90609	0.607299	0.906789	0.671371	314	tags=8%, list=2%, signal=8%	5320/26279
hsa04114	Oocyte meiosis	118	0.397447	1.09276	0.327293	0.648695	0.480283	2620	tags=19%, list=13%, signal=17%	991/6790/3479/113/4085/699/983/9133/10734/9134/5347/891/8379/109/9700/9985/7533/3708/9232/6195/7532/10459/26271
hsa04020	Calcium signaling pathway	199	0.395575	1.12999	0.229715	0.544326	0.40301	1723	tags=13%, list=8%, signal=12%	952/5026/7852/5027/2769/5579/255231/5724/489/10800/154/814/136/113/3357/5156/1909/5336/6546/8877/10105/3269/135/109/5023/5330
hsa04973	Carbohydrate digestion and absorption	41	0.393975	0.959913	0.541497	0.847488	0.627466	841	tags=10%, list=4%, signal=9%	3101/5579/5293/6518
hsa04071	Sphingolipid signaling pathway	116	0.391673	1.07395	0.349261	0.682634	0.50541	3085	tags=23%, list=15%, signal=20%	130367/2207/5579/5880/5293/7124/140/8877/5330/5521/8698/2205/2771/9294/1903/10672/4893/5338/2768/4363/1509/4790/7157/5970/2773/5337/2534
hsa05215	Prostate cancer	97	0.391533	1.05907	0.383908	0.711674	0.526911	3366	tags=28%, list=17%, signal=23%	4318/7850/5293/3479/5156/9134/5328/90993/4792/83439/5327/4824/7113/2885/4893/51176/4790/7157/5970/6692/898/148327/1870/1147/1026/4193/6932
hsa05217	Basal cell carcinoma	62	0.388926	1.00189	0.473146	0.773593	0.572755	4909	tags=35%, list=24%, signal=27%	4616/7472/81029/578/11211/83439/2535/10912/51176/7157/1026/80326/6932/7483/2737/2736/51684/8313/1643/7482/10297/581
hsa04390	Hippo signaling pathway	153	0.387678	1.0887	0.32538	0.648695	0.480283	2430	tags=16%, list=12%, signal=14%	330/3689/5054/332/166824/85409/7472/7043/81029/122786/4609/6591/8200/7040/11211/5521/83439/2535/11186/374/7533/51176/55233/7532/654
hsa04725	Cholinergic synapse	111	0.387175	1.05847	0.372727	0.708615	0.524647	2302	tags=16%, list=11%, signal=14%	5294/5579/814/5293/2793/23533/3717/113/54331/146850/90993/109/5330/2771/59345/4893/3768/3708
hsa04921	Oxytocin signaling pathway	151	0.384632	1.07676	0.352941	0.68291	0.505615	2325	tags=16%, list=11%, signal=14%	952/5294/5579/814/23533/5997/113/7226/4772/146850/4773/109/5330/5321/784/5743/2771/55799/5021/4775/4893/3768/3708/8605
hsa01040	Biosynthesis of unsaturated fatty acids	25	0.379409	0.865042	0.66136	0.925253	0.685042	2006	tags=20%, list=10%, signal=18%	3992/11332/6319/9415/79071
hsa04960	Aldosterone-regulated sodium reabsorption	36	0.379136	0.906972	0.590476	0.898073	0.664918	783	tags=11%, list=4%, signal=11%	5579/2810/5293/3479
hsa02010	ABC transporters	44	0.378163	0.934332	0.574099	0.877244	0.649497	2804	tags=27%, list=14%, signal=24%	6891/23460/6890/10347/225/10257/10057/5244/89845/21/4363/23456
hsa05168	Herpes simplex virus 1 infection	456	0.377248	1.10459	0.209	0.502522	0.372059	2007	tags=16%, list=10%, signal=14%	3126/330/3458/6352/684/3112/3108/6891/6890/3113/6772/4938/3569/29992/3115/3117/4939/6347/3553/3111/5293/3593/5452/7188/3122/3134/3717/356/972/718/3127/1978/3123/3665/4940/7098/7097/8764/94039/3654/3119/7124/8740/5199/9021/64135/10308/3133/4615/23586/3135/7187/3455/10379/6892/578/115004/3106/3107/4792/5371/4049/10189/6773/152687/836/10838/54106/841/3109/148022
hsa00564	Glycerophospholipid metabolism	94	0.375739	1.01072	0.468677	0.773593	0.572755	3543	tags=27%, list=17%, signal=22%	5320/196051/26279/51365/1606/79888/150763/122618/8525/5321/84513/23175/5338/8605/56895/154141/5337/254531/10908/10434/10390/56261/56894/23659/1609
hsa04931	Insulin resistance	108	0.374654	1.02301	0.455581	0.767912	0.568549	3052	tags=22%, list=15%, signal=19%	9945/5579/3569/5293/5836/7124/11001/9021/10062/90993/4792/133522/9882/2997/11000/6195/5770/4790/5970/6774/183/148327/10999/6199
hsa05020	Prion disease	251	0.37273	1.07871	0.311728	0.637095	0.471694	3389	tags=17%, list=17%, signal=14%	4689/6352/4688/653361/713/3310/1536/714/712/5880/3569/347733/3553/5293/730/7124/7280/10105/90993/836/3708/7277/7278/3798/7846/6389/4684/203068/84790/1535/3552/317/148327/10381/2534/5713/10376/11047/292/64837/5707/5567/2906
hsa05216	Thyroid cancer	37	0.371849	0.890153	0.618008	0.914428	0.677027	3515	tags=32%, list=17%, signal=27%	4616/578/4609/83439/10912/4893/51176/7157/1026/6932/7170/8030
hsa00983	Drug metabolism - other enzymes	66	0.370916	0.959939	0.531052	0.847488	0.627466	2140	tags=12%, list=11%, signal=11%	6241/1890/7083/7498/3614/7371/7367/9
hsa00511	Other glycan degradation	18	0.364066	0.775868	0.736089	0.937617	0.694196	746	tags=6%, list=4%, signal=5%	4125
hsa04022	cGMP-PKG signaling pathway	165	0.360986	1.01766	0.460541	0.768351	0.568874	2916	tags=19%, list=14%, signal=17%	5294/150/489/154/23533/5997/113/1909/3779/6546/140/3778/4772/10105/146850/4773/90993/109/5330/2771/5140/10672/4775/7408/3708/493/2768/4207/2982/486/4205/148327
hsa00340	Histidine metabolism	22	0.359848	0.796908	0.728097	0.937617	0.694196	54	tags=5%, list=0%, signal=5%	26
hsa04213	Longevity regulating pathway - multiple species	60	0.35814	0.920935	0.600509	0.906789	0.671371	864	tags=8%, list=4%, signal=8%	3310/5293/6648/3479/113
hsa04070	Phosphatidylinositol signaling system	97	0.357047	0.965792	0.53908	0.847488	0.627466	2493	tags=14%, list=12%, signal=13%	5579/1606/5293/3635/5336/8395/8821/5330/8525/5305/55361/3708/64419/55300
hsa00514	Other types of O-glycan biosynthesis	46	0.355916	0.886514	0.62533	0.92038	0.681434	3780	tags=35%, list=19%, signal=28%	6480/11226/4242/79709/3955/2590/2589/11227/285203/55568/8704/117248/56983/2683/8693/8985
hsa05224	Breast cancer	145	0.351111	0.977705	0.531422	0.847488	0.627466	3231	tags=20%, list=16%, signal=17%	8600/5293/3479/4616/675/7472/2247/4791/81029/578/4609/11211/83439/2535/2885/8202/10912/4893/51176/1021/3815/8648/53358/7157/23401/1870/6199/1026/80326
hsa01240	Biosynthesis of cofactors	139	0.349143	0.969904	0.548458	0.84998	0.629311	2564	tags=14%, list=13%, signal=13%	3620/195814/8564/8942/586/2643/8836/10797/249/129607/217/169355/7367/5373/1503/5315/29926/6999/205/65220
hsa00350	Tyrosine metabolism	36	0.347944	0.832355	0.717007	0.937617	0.694196	1603	tags=8%, list=8%, signal=8%	259307/125/7173
hsa04371	Apelin signaling pathway	135	0.346147	0.96084	0.558011	0.858591	0.635686	3381	tags=22%, list=17%, signal=19%	5294/814/2793/23533/113/5054/6696/54331/6546/8877/146850/109/5330/2771/5140/5327/59345/10672/4893/3708/94235/4207/4205/10365/8862/2773/6199/187/5567/51806
hsa05218	Melanoma	72	0.345337	0.903503	0.631514	0.921897	0.682557	3310	tags=21%, list=16%, signal=18%	5293/3479/4616/5156/2247/3082/1029/578/10912/4893/1021/7157/1870/1026/4193
hsa03410	Base excision repair	33	0.345023	0.81575	0.74477	0.937617	0.694196	3923	tags=33%, list=19%, signal=27%	2237/5424/142/55247/5427/5111/27301/8930/5426/6996/10039
hsa00480	Glutathione metabolism	52	0.344653	0.872426	0.660156	0.925253	0.685042	2087	tags=15%, list=10%, signal=14%	6241/27306/290/51056/3418/494143/6723/493869
hsa04730	Long-term depression	58	0.343449	0.880367	0.659004	0.925253	0.685042	2704	tags=21%, list=13%, signal=18%	5579/3479/4067/5330/5321/2771/10672/4893/3708/8605/2768/2982
hsa00512	Mucin type O-glycan biosynthesis	31	0.341986	0.794424	0.770563	0.943723	0.698716	2868	tags=26%, list=14%, signal=22%	11226/2590/6483/2589/11227/55568/9334/117248
hsa05231	Choline metabolism in cancer	96	0.339311	0.915602	0.615917	0.914428	0.677027	2447	tags=18%, list=12%, signal=16%	5579/5880/1606/5293/1978/5156/8395/7454/8525/5321/5900/6581/2885/4893/5338/8605/6583
hsa04935	Growth hormone synthesis, secretion and action	118	0.338821	0.931574	0.604757	0.906789	0.671371	3034	tags=17%, list=15%, signal=15%	5579/6772/5293/3479/3717/113/5336/9021/90993/109/5330/2771/2885/4893/3708/53358/6774/148327/6776/2773
hsa04726	Serotonergic synapse	108	0.336494	0.91881	0.604784	0.906789	0.671371	2536	tags=17%, list=12%, signal=15%	5579/240/5742/2793/3357/6571/54331/247/5330/5321/5743/836/2771/59345/4893/3708/8605/94235
hsa00330	Arginine and proline metabolism	49	0.33385	0.840945	0.688802	0.937617	0.694196	1877	tags=14%, list=9%, signal=13%	26/51056/6723/5831/217/1159/112849
hsa04915	Estrogen signaling pathway	130	0.331482	0.916235	0.64437	0.925253	0.685042	3034	tags=18%, list=15%, signal=16%	4318/3310/5293/113/3861/3868/3860/90993/109/5330/2771/4313/2885/8202/4893/3708/8648/2289/1509/53358/3880/148327/1839/2773
hsa04120	Ubiquitin mediated proteolysis	137	0.329222	0.914147	0.648291	0.925253	0.685042	3377	tags=15%, list=17%, signal=12%	330/991/11065/9246/9021/7318/27338/5371/51465/7321/9886/57154/64750/4281/7326/868/55236/4193/55294/90293
hsa00562	Inositol phosphate metabolism	73	0.328823	0.859692	0.703704	0.937617	0.694196	2493	tags=15%, list=12%, signal=13%	5294/5293/3635/5336/8395/8821/5330/5305/55361/64419/55300
hsa00860	Porphyrin and chlorophyll metabolism	32	0.32638	0.763828	0.81339	0.978521	0.72448	3436	tags=19%, list=17%, signal=16%	3162/1356/7367/9843/212/644
hsa05226	Gastric cancer	146	0.324608	0.904967	0.667767	0.925253	0.685042	3907	tags=23%, list=19%, signal=19%	5293/4616/7472/7043/2247/3082/1030/81029/578/9134/4609/7040/11211/83439/2535/2885/10912/4893/51176/53358/7157/1015/23401/898/1870/6199/1026/80326/6932/5243/2252/7483/6464/6654
hsa04722	Neurotrophin signaling pathway	119	0.323134	0.887129	0.681044	0.93572	0.692792	3381	tags=23%, list=17%, signal=19%	814/5293/356/4145/11213/5336/3654/4794/10019/4792/8767/9252/2885/4893/10603/6195/53358/4790/396/7157/5970/2889/4215/9500/9261/397/51806
hsa04930	Type II diabetes mellitus	45	0.321808	0.798254	0.763926	0.939112	0.695302	1288	tags=9%, list=6%, signal=8%	3101/5293/7124/9021
hsa04916	Melanogenesis	100	0.321436	0.869719	0.695502	0.937617	0.694196	3638	tags=23%, list=18%, signal=19%	5579/113/7472/81029/90993/109/5330/11211/83439/1906/2771/2535/4893/51176/3815/148327/2773/80326/6932/5567/51806/4157/5578
hsa05032	Morphine addiction	91	0.318367	0.854186	0.702671	0.937617	0.694196	2536	tags=18%, list=12%, signal=15%	5579/409/2793/113/54331/5142/408/2870/109/2771/5140/157/59345/156/5150/94235
hsa04530	Tight junction	163	0.317727	0.89574	0.690733	0.937617	0.694196	3098	tags=19%, list=15%, signal=16%	913/3059/910/909/911/9071/912/7454/10095/5010/9368/5521/861/4627/87/51762/51735/4218/7408/7277/10109/7278/7846/23370/10096/5111/84790/10097/23562/10376/79778
hsa04340	Hedgehog signaling pathway	48	0.31667	0.795506	0.759843	0.937617	0.694196	4142	tags=33%, list=20%, signal=27%	409/408/2619/157/156/57154/64750/23432/1455/5567/1454/1453/53944/2737/2736/51684
hsa00230	Purine metabolism	122	0.315784	0.867787	0.715411	0.937617	0.694196	2792	tags=17%, list=14%, signal=15%	6241/270/9060/51816/100/113/7498/5142/3614/109/5140/271/272/5315/1633/205/9583/5150/318/2982/55276
hsa04923	Regulation of lipolysis in adipocytes	55	0.31556	0.804914	0.757381	0.937617	0.694196	1966	tags=16%, list=10%, signal=15%	5742/154/5293/113/11343/109/5743/2771/5140
hsa05213	Endometrial cancer	58	0.314298	0.805644	0.754789	0.937617	0.694196	2633	tags=17%, list=13%, signal=15%	5293/4616/578/4609/83439/2885/10912/4893/51176/7157
hsa04211	Longevity regulating pathway	88	0.314164	0.836243	0.744681	0.937617	0.694196	3464	tags=22%, list=17%, signal=18%	814/5293/6648/3479/113/1978/90993/109/4893/83667/8408/4790/7157/5970/148327/6199/9470/5567/57521
hsa04724	Glutamatergic synapse	112	0.313363	0.856239	0.726651	0.937617	0.694196	3709	tags=22%, list=18%, signal=18%	5579/2793/113/54331/6507/109/5330/5321/2771/157/59345/5338/3708/8605/156/94235/2899/2752/2773/5337/5567/2906/6506/5578/2898
hsa05034	Alcoholism	106	0.310491	0.847914	0.729852	0.937617	0.694196	4271	tags=27%, list=21%, signal=22%	814/136/2793/6571/54331/55315/135/90993/2771/59345/2885/4893/94235/53358/148327/2773/5567/51806/2906/8841/9759/6464/6654/2903/468/2788/399694/91860/2782
hsa04975	Fat digestion and absorption	42	0.309237	0.755239	0.829499	0.978521	0.72448	314	tags=5%, list=2%, signal=5%	5320/26279
hsa05030	Cocaine addiction	49	0.309104	0.778612	0.790365	0.960778	0.711344	3983	tags=29%, list=20%, signal=23%	6571/8851/90993/2771/8787/4790/5970/148327/2773/5567/2906/1020/2903/468
hsa05225	Hepatocellular carcinoma	162	0.308767	0.872102	0.728249	0.937617	0.694196	3366	tags=20%, list=17%, signal=17%	5579/5293/3162/4616/7472/7043/5336/3082/1029/81029/578/4609/7040/11211/83439/2535/2885/10912/4893/51176/1021/7296/53358/7157/23401/598/1870/6199/1026/80326/2949/60/6932
hsa04550	Signaling pathways regulating pluripotency of stem cells	139	0.307909	0.85536	0.736784	0.937617	0.694196	3419	tags=17%, list=17%, signal=14%	3624/5293/3479/3717/7472/2247/3718/81029/4211/4609/3198/11211/2535/2885/4893/3720/84333/3976/6774/6929/80326/6932/658/6498
hsa04141	Protein processing in endoplasmic reticulum	165	0.307615	0.867201	0.740541	0.937617	0.694196	4949	tags=34%, list=24%, signal=26%	3310/91319/4121/26270/578/10802/30001/51465/85479/6400/7321/7494/9871/6748/56605/7415/55741/10970/51726/10525/10113/7841/56886/10484/29927/7326/55829/3301/9695/54431/81567/3312/6746/80267/5034/2081/5610/468/10956/811/25956/6396/22872/440275/7466/5611/10961/9709/23471/7186/9451/27102/9601/3320/581/55666
hsa00450	Selenocompound metabolism	16	0.304846	0.638497	0.893268	0.986031	0.730041	576	tags=6%, list=3%, signal=6%	9060
hsa01522	Endocrine resistance	95	0.303812	0.816973	0.782305	0.954529	0.706717	3379	tags=22%, list=17%, signal=19%	4318/5293/3479/113/1029/638/109/4313/2885/8202/4893/10498/53358/7157/1870/1839/6199/1026/4193/5469/5567
hsa00513	Various types of N-glycan biosynthesis	39	0.30208	0.72913	0.850685	0.978521	0.72448	3663	tags=23%, list=18%, signal=19%	4121/4124/2530/11320/4247/8704/4245/284004/2683
hsa00620	Pyruvate metabolism	38	0.30127	0.723924	0.865489	0.978521	0.72448	2462	tags=21%, list=12%, signal=19%	134526/4200/217/3948/39/3939/5315/4199
hsa00280	Valine, leucine and isoleucine degradation	48	0.299888	0.753347	0.824147	0.978521	0.72448	365	tags=4%, list=2%, signal=4%	259307/586
hsa04929	GnRH secretion	64	0.295517	0.762639	0.842239	0.978521	0.72448	2302	tags=14%, list=11%, signal=13%	5579/5293/409/6696/408/3783/5330/4893/3708
hsa05110	Vibrio cholerae infection	50	0.293543	0.741433	0.84026	0.978521	0.72448	3864	tags=24%, list=19%, signal=19%	5336/10312/109/30001/526/29927/11015/9114/60/5567/5578/11014
hsa04920	Adipocytokine signaling pathway	69	0.291282	0.761867	0.84204	0.978521	0.72448	3176	tags=20%, list=16%, signal=17%	7133/3717/2182/51703/4794/7124/9021/4792/4790/5970/6774/126129/1147/23305
hsa05017	Spinocerebellar ataxia	141	0.289738	0.805572	0.823594	0.978521	0.72448	4193	tags=21%, list=21%, signal=17%	5579/489/146227/5293/5649/10105/55062/5330/7494/3708/8408/3752/3516/5713/11047/292/5707/2906/23152/29982/6310/5578/6667/2081/2903/5685/6712/5688/9519/90550
hsa04360	Axon guidance	179	0.288824	0.823289	0.819048	0.978521	0.72448	3760	tags=26%, list=18%, signal=21%	7852/10512/5880/5163/5293/59277/6387/5336/2048/10507/81029/22885/4773/1808/6091/7869/10154/10371/64221/2242/23380/1946/2771/27289/4775/4893/219699/8829/5062/84628/8482/1949/85464/5361/2773/2534/2050/10509/658/55558/5063/5578/10627/3984/1020/1630
hsa00510	N-Glycan biosynthesis	49	0.286832	0.722511	0.861979	0.978521	0.72448	3165	tags=18%, list=16%, signal=16%	4121/6480/4124/2530/11320/4247/8704/7841/4245
hsa04910	Insulin signaling pathway	136	0.283894	0.789187	0.835165	0.978521	0.72448	3907	tags=22%, list=19%, signal=18%	5577/3101/5293/1978/5836/2203/9021/8569/5140/2997/2885/4893/10603/5770/53358/2194/2889/3098/80201/6199/868/9470/5567/51806/57521/2319/2645/3636/6464/6654
hsa04150	mTOR signaling pathway	152	0.278869	0.781386	0.858696	0.978521	0.72448	3501	tags=17%, list=17%, signal=14%	5579/8140/5293/3479/1978/7472/7124/81029/54541/11211/23175/2535/2885/4893/6446/83667/6195/8408/526/6199/1147/54468/80326/9470/57521/55615
hsa04270	Vascular smooth muscle contraction	130	0.278256	0.769116	0.867336	0.978521	0.72448	2406	tags=15%, list=12%, signal=13%	5320/26279/5579/136/113/1909/3779/3778/135/109/5330/5321/1906/4627/10672/3708/8605/9138/2768
hsa04924	Renin secretion	69	0.27516	0.719699	0.893035	0.986031	0.730041	3430	tags=25%, list=17%, signal=21%	154/5732/9635/1909/3778/5330/5734/1906/2771/5140/3708/2982/183/2773/5567/51806/84876
hsa04024	cAMP signaling pathway	212	0.274724	0.784963	0.89557	0.986031	0.730041	2074	tags=10%, list=10%, signal=9%	7409/8843/5880/489/154/5732/814/5293/113/1909/5142/4772/135/90993/109/4792/10257/1906/2771/5140/5021
hsa04012	ErbB signaling pathway	84	0.274288	0.727499	0.892086	0.986031	0.730041	4132	tags=29%, list=20%, signal=23%	5579/5293/1978/5336/4609/2885/374/4893/27/53358/5062/6776/1839/6199/1026/868/10718/2069/5063/5578/6464/6654/867/399694
hsa00310	Lysine degradation	63	0.273443	0.706181	0.891995	0.986031	0.730041	4694	tags=29%, list=23%, signal=22%	2146/79709/51268/217/8424/39/2122/6839/55526/84444/8985/79813/80854/10157/9757/55904/9739/83852
hsa05022	Pathways of neurodegeneration - multiple diseases	448	0.270552	0.791667	0.943	1	0.740383	3389	tags=15%, list=17%, signal=13%	2861/1536/5579/22943/3569/489/347733/4744/3553/7133/50507/356/7472/9246/8851/27123/7124/840/7280/10105/81029/55062/578/10133/7318/5330/51465/5743/11211/1435/836/841/7345/2535/493869/7494/4893/4218/3708/7277/7278/3798/7846/6389/1767/8408/7415/4790/5970/203068/84790/84134/23401/598/3552/317/10381/5713/10376/1616/7326/11047/292/80326/64837/5608/5707/51806/2906
hsa04976	Bile secretion	79	0.262756	0.694778	0.913253	0.999854	0.740275	3379	tags=18%, list=17%, signal=15%	366/113/3949/57552/109/7367/10257/5244/200931/760/486/6343/3781/5567
hsa04961	Endocrine and other factor-regulated calcium reabsorption	52	0.260731	0.659992	0.924479	0.999854	0.740275	3638	tags=23%, list=18%, signal=19%	5579/7421/6546/5330/493/486/1785/161/1759/1175/5567/5578
hsa04152	AMPK signaling pathway	120	0.259433	0.712673	0.926471	0.999854	0.740275	3092	tags=15%, list=15%, signal=13%	890/5293/3479/1978/8900/2203/6319/90993/5521/2997/4218/8408/2194/5210/148327/126129/6199/23216
hsa04912	GnRH signaling pathway	91	0.256706	0.688748	0.939605	1	0.740383	4252	tags=26%, list=21%, signal=21%	5579/113/4323/109/5330/5321/4313/2885/4893/5338/3708/8605/1839/4215/5337/5608/5567/51806/5578/6654/468/5606/5600/91860
hsa05211	Renal cell carcinoma	68	0.255751	0.668029	0.940447	1	0.740383	2754	tags=15%, list=14%, signal=13%	5293/7043/3082/112399/7040/2885/4893/2113/5062/2889
hsa03430	Mismatch repair	22	0.253176	0.560676	0.965257	1	0.740383	2752	tags=18%, list=14%, signal=16%	5424/5984/5111/9156
hsa05010	Alzheimer disease	344	0.251866	0.737086	0.967644	1	0.740383	3389	tags=16%, list=17%, signal=13%	1536/22943/3569/489/347733/3553/5293/50507/7472/8851/27123/7124/840/7280/10105/81029/55062/5330/5743/11211/1435/4311/836/841/2535/7494/4893/3708/7277/7278/3798/7846/6389/8408/4035/4790/5970/203068/84790/23401/3552/317/25825/10381/1147/5713/10376/11047/292/80326/64837/5707/51806/2906
hsa04932	Non-alcoholic fatty liver disease	143	0.248808	0.691975	0.959206	1	0.740383	2642	tags=13%, list=13%, signal=12%	3570/3569/3553/5293/356/7124/9021/840/10062/1050/3576/7040/836/841/7494/6389/10018/4790/5970
hsa04520	Adherens junction	69	0.238943	0.624971	0.972637	1	0.740383	3366	tags=17%, list=17%, signal=15%	5880/5777/7454/6591/83439/87/51176/9855/5770/2534/60/6932
hsa04934	Cushing syndrome	153	0.235394	0.661045	0.982646	1	0.740383	3430	tags=20%, list=17%, signal=16%	113/7472/1029/1030/3949/81029/57552/9134/90993/109/5330/11211/83439/2771/2535/51176/1021/3708/898/183/148327/1870/196/2773/6770/1026/80326/6932/5567/84876
hsa05031	Amphetamine addiction	69	0.227116	0.594038	0.987562	1	0.740383	1659	tags=6%, list=8%, signal=5%	5579/814/6571/90993
hsa04330	Notch signaling pathway	53	0.225092	0.571166	0.985714	1	0.740383	2741	tags=11%, list=13%, signal=10%	4242/3955/151636/113878/3516/8650
hsa04728	Dopaminergic synapse	132	0.220992	0.611307	0.994438	1	0.740383	2536	tags=11%, list=12%, signal=9%	5579/409/2793/6571/54331/408/90993/5330/5521/2771/59345/3708/3798/94235
hsa04140	Autophagy - animal	136	0.215415	0.598825	0.995604	1	0.740383	4570	tags=24%, list=22%, signal=19%	338382/5293/1612/55062/54541/89849/81671/4893/4218/3708/8408/64419/1613/1514/1509/598/6199/10533/5567/8837/57521/29982/55054/7405/2081/22808/3091/51100/440275/5580/29110/9711/10645
hsa04137	Mitophagy - animal	66	0.197191	0.510335	0.998733	1	0.740383	4111	tags=20%, list=20%, signal=16%	338382/10133/4893/8408/7157/5970/598/6667/89941/9958/468/22808/3091
hsa05014	Amyotrophic lateral sclerosis	340	0.196447	0.574077	1	1	0.740383	5278	tags=28%, list=26%, signal=21%	834/347733/4744/7133/23225/7124/7280/55062/10133/23636/10189/836/493869/5216/7494/4218/7277/7278/3798/7846/6389/1767/10762/8408/7415/7157/203068/84790/84134/598/9688/317/10381/5713/10376/1616/11047/55706/10718/64837/60/5608/5707/2906/10121/57122/9631/29982/6506/4747/2081/3831/10452/9972/2903/4704/5685/468/79902/5688/5606/90550/5600/5533/6396/2733/55998/23279/29110/55916/4686/2882/7186/7175/2877/5…
hsa04744	Phototransduction	28	0.193286	0.444588	0.995696	1	0.740383	16418	tags=100%, list=81%, signal=19%	8787/51806/5148/91860/2782/1258/808/2986/2978/6011/2779/810/3000/5145/2780/9626/163688/2979/131890/801/9187/1259/2792/6295/5957/805/6010/5158
hsa05012	Parkinson disease	229	0.192725	0.554509	1	1	0.740383	3381	tags=16%, list=17%, signal=13%	2861/347733/6571/9246/7280/10105/135/7318/51465/836/2771/7345/7494/3708/7277/7278/3798/7846/6389/7157/203068/84790/598/317/10381/2773/5713/10376/1616/7326/11047/292/64837/5707/5567/51806
hsa05016	Huntington disease	283	0.165844	0.481261	1	1	0.740383	3590	tags=14%, list=18%, signal=12%	347733/7052/6648/7280/6507/10105/55062/90993/5330/836/6875/841/493869/3708/7277/7278/3798/7846/6389/1767/8408/3766/7157/203068/84790/317/148327/161/10381/5713/10376/5433/11047/292/64837/23186/5707/1175/10121/29982/6506
hsa03040	Spliceosome	126	0.115979	0.320434	1	1	0.740383	331	tags=1%, list=2%, signal=1%	3310
hsa00900	Terpenoid backbone biosynthesis	22	-0.17576	-0.4624	0.997059	1	0.740383	4810	tags=23%, list=24%, signal=17%	57107/2339/51449/9453/10654
hsa03008	Ribosome biogenesis in eukaryotes	75	-0.179134	-0.614657	1	1	0.740383	6049	tags=27%, list=30%, signal=19%	27341/51096/1459/23160/29107/51367/10556/23195/55781/55272/55651/10248/102157402/54913/51077/51119/138716/10436/84916/4809
hsa04740	Olfactory transduction	127	-0.183469	-0.680953	1	1	0.740383	926	tags=4%, list=5%, signal=4%	5592/5137/5136/401427/816
hsa04922	Glucagon signaling pathway	105	-0.193168	-0.692325	1	1	0.740383	5824	tags=29%, list=29%, signal=20%	207/5532/5106/3709/5465/31/10891/3945/805/1386/92579/5256/51422/2778/5160/32/1374/5564/10000/108/2776/5213/5105/10488/208/5563/5255/5332/5224/816
hsa03013	RNA transport	155	-0.197022	-0.757022	1	1	0.740383	5074	tags=26%, list=25%, signal=20%	29107/51367/10556/11102/11218/10289/81929/1964/8891/9883/7329/7341/8667/129401/79833/8087/84305/22794/10248/11171/79897/54913/79023/140886/10284/51095/138716/91181/80336/5976/10073/59343/65110/8892/132430/8487/55520/11269/54960/9086
hsa03018	RNA degradation	77	-0.201853	-0.690675	0.983696	1	0.740383	4474	tags=22%, list=22%, signal=17%	10438/4850/23404/10200/25804/1656/2027/140886/57819/27258/23658/80336/5213/9924/56915/23016/132430
hsa03015	mRNA surveillance pathway	91	-0.228326	-0.792656	0.914894	0.999854	0.740275	4199	tags=27%, list=21%, signal=22%	81608/5520/5518/5529/5516/29107/4440/5515/23293/55844/5525/1478/51585/84305/22794/140886/10284/1479/64895/80336/5976/65110/132430/124540/11269
hsa01230	Biosynthesis of amino acids	70	-0.244343	-0.822426	0.829897	0.978521	0.72448	3172	tags=20%, list=16%, signal=17%	113675/2027/1373/5723/435/5213/875/48/445/162417/26227/384/5091/5224
hsa01200	Carbon metabolism	115	-0.245816	-0.907837	0.746032	0.937617	0.694196	4088	tags=25%, list=20%, signal=20%	84693/5096/6470/5160/4524/2098/1743/8802/26007/113675/6391/2027/1373/5723/5095/5213/48/10873/4329/26275/847/275/3099/2653/55753/26227/5091/5224/9104
hsa04919	Thyroid hormone signaling pathway	120	-0.246791	-0.91526	0.711864	0.937617	0.694196	3498	tags=21%, list=17%, signal=17%	116931/842/6257/7068/7249/4855/6009/10000/5213/10231/595/5291/208/7067/482/1734/5208/6258/113026/51196/5332/477/53919/5350/117247
hsa04721	Synaptic vesicle cycle	77	-0.249045	-0.852152	0.815217	0.978521	0.72448	4552	tags=23%, list=22%, signal=18%	440279/90423/1211/528/6616/535/534/6539/26052/6536/6812/9550/50617/6809/6844/8218/4905/6540
hsa01212	Fatty acid metabolism	55	-0.253122	-0.804418	0.869955	0.978521	0.72448	4427	tags=35%, list=22%, signal=27%	51144/6785/2181/201562/1376/27349/79993/1374/51495/3033/9200/51102/79966/10449/36/54995/54898/7923/33
hsa04962	Vasopressin-regulated water reabsorption	44	-0.253448	-0.77312	0.853755	0.978521	0.72448	5432	tags=36%, list=27%, signal=27%	115/51164/398/361/554/2778/140735/8766/1780/10488/10671/51626/1781/6844/79659/4905
hsa04723	Retrograde endocannabinoid signaling	139	-0.254091	-0.951283	0.62766	0.92038	0.681434	3242	tags=21%, list=16%, signal=18%	4715/4712/4709/4700/51079/108/4697/4701/4719/2776/4724/2791/57406/2563/2892/3760/4708/4717/776/55970/1432/2562/2166/222236/5602/5332/56901/114/2564
hsa04136	Autophagy - other	31	-0.254583	-0.73247	0.873786	0.978521	0.72448	5449	tags=29%, list=27%, signal=21%	30849/5516/23710/9474/5515/11345/64223/3476/83734
hsa04925	Aldosterone synthesis and secretion	96	-0.255076	-0.893258	0.755556	0.937617	0.694196	2807	tags=16%, list=14%, signal=14%	4881/108/2776/466/8911/10488/5138/482/776/3777/5332/114/477/816/185
hsa04966	Collecting duct acid secretion	27	-0.256275	-0.704407	0.924837	0.999854	0.740275	4386	tags=30%, list=22%, signal=23%	90423/528/535/534/9550/495/50617/1188
hsa04911	Insulin secretion	84	-0.260219	-0.908429	0.666667	0.925253	0.685042	2919	tags=17%, list=14%, signal=14%	2740/108/2776/10488/11069/117/6844/482/776/5332/114/477/1131/816
hsa04261	Adrenergic signaling in cardiomyocytes	148	-0.26104	-0.996093	0.455556	0.767912	0.568549	1778	tags=16%, list=9%, signal=15%	6324/10000/108/3784/2776/10488/11069/208/153/482/6332/776/1432/783/10411/5332/114/7134/9254/477/5350/816/6330/185
hsa04720	Long-term potentiation	67	-0.261305	-0.873302	0.732673	0.937617	0.694196	310	tags=7%, list=2%, signal=7%	673/10411/5332/114/816
hsa00980	Metabolism of xenobiotics by cytochrome P450	62	-0.26307	-0.873192	0.731818	0.937617	0.694196	5057	tags=39%, list=25%, signal=29%	22977/4259/128/218/1645/4258/2940/130/1571/2052/8574/1555/1565/4257/1545/2941/2948/27294/2944/2946/374875/2947/119391/2952
hsa00030	Pentose phosphate pathway	29	-0.263433	-0.738484	0.858974	0.978521	0.72448	768	tags=10%, list=4%, signal=10%	5213/64080/9104
hsa03420	Nucleotide excision repair	43	-0.272532	-0.825034	0.757812	0.937617	0.694196	6559	tags=37%, list=32%, signal=25%	5981/9978/6117/1022/6119/2067/902/6118/1161/7507/56655/5887/1069/2968/4331/404672
hsa04130	SNARE interactions in vesicular transport	33	-0.273322	-0.785376	0.803509	0.973138	0.720495	1882	tags=18%, list=9%, signal=17%	662/6809/6844/6843/55850/8674
hsa00071	Fatty acid degradation	42	-0.274036	-0.832034	0.749049	0.937617	0.694196	4850	tags=36%, list=24%, signal=27%	37/128/501/2181/1376/130/223/1374/10455/3033/224/10449/36/1632/33
hsa05204	Chemical carcinogenesis	68	-0.274685	-0.916254	0.658163	0.925253	0.685042	4544	tags=31%, list=22%, signal=24%	128/218/4258/2940/130/1571/2052/4257/1545/883/2941/2948/2944/1558/2946/374875/2947/6817/119391/6799/2952
hsa03060	Protein export	23	-0.275177	-0.728465	0.871166	0.978521	0.72448	5023	tags=26%, list=25%, signal=20%	7095/23478/6730/11231/83943/196294
hsa00061	Fatty acid biosynthesis	17	-0.277661	-0.681059	0.919271	0.999854	0.740275	4318	tags=53%, list=21%, signal=42%	84869/31/2181/27349/32/51102/55301/54995/7923
hsa04918	Thyroid hormone synthesis	73	-0.279943	-0.952498	0.546875	0.84998	0.629311	562	tags=16%, list=3%, signal=16%	7276/108/2776/10488/53905/482/4036/5332/114/50506/477/405753
hsa04979	Cholesterol metabolism	50	-0.284133	-0.884001	0.672414	0.927761	0.686898	2176	tags=20%, list=11%, signal=18%	4023/336/6272/29116/341/348/948/1071/4036/9388
hsa04713	Circadian entrainment	97	-0.288491	-1.00902	0.439394	0.756276	0.559934	2895	tags=20%, list=14%, signal=17%	2983/108/2776/8911/2791/117/2892/3760/2353/776/55970/8863/5592/6261/51655/5332/114/816/6263
hsa04927	Cortisol synthesis and secretion	64	-0.289074	-0.958317	0.541667	0.847488	0.627466	2774	tags=17%, list=14%, signal=15%	108/2776/8911/10488/5087/776/3777/8622/5332/114/185
hsa03022	Basal transcription factors	41	-0.29194	-0.880201	0.666667	0.925253	0.685042	6300	tags=37%, list=31%, signal=25%	9569/2958/2963/6879/1022/6908/902/2969/2959/129685/51616/138474/2968/4331/404672
hsa00730	Thiamine metabolism	15	-0.295705	-0.708183	0.863524	0.978521	0.72448	5318	tags=47%, list=26%, signal=34%	52/158067/27010/203/9054/79178/84284
hsa00020	Citrate cycle (TCA cycle)	30	-0.304917	-0.872313	0.656151	0.925253	0.685042	3833	tags=27%, list=19%, signal=22%	5160/1743/8802/6391/5105/48/55753/5091
hsa04977	Vitamin digestion and absorption	22	-0.306304	-0.805845	0.726471	0.937617	0.694196	1288	tags=9%, list=6%, signal=9%	25974/8029
hsa04260	Cardiac muscle contraction	81	-0.312866	-1.08273	0.279762	0.601856	0.445604	1951	tags=14%, list=10%, signal=12%	29796/1349/3270/482/776/783/845/84701/7134/9254/477
hsa00982	Drug metabolism - cytochrome P450	57	-0.315247	-1.01043	0.399083	0.711743	0.526962	4771	tags=37%, list=23%, signal=28%	128/218/4258/2940/130/1571/1555/1565/4257/2329/2941/2948/4129/2944/1558/2946/2330/2947/119391/2952/4128
hsa04971	Gastric acid secretion	74	-0.318289	-1.08688	0.25	0.571678	0.423261	2774	tags=20%, list=14%, signal=18%	340156/3758/108/3784/495/2776/9992/482/3773/5332/114/115111/477/1131/816
hsa04727	GABAergic synapse	89	-0.320777	-1.11409	0.254902	0.574848	0.425608	2304	tags=19%, list=11%, signal=17%	5334/108/9568/18/2791/2563/776/55970/27165/66008/2562/10243/92745/114/2564/4905/6540
hsa04714	Thermogenesis	215	-0.328177	-1.29559	0.0188679	0.0752416	0.0557076	5832	tags=41%, list=29%, signal=30%	6605/4694/656/4714/4722/4711/4698/137682/4879/513/4725/10891/1537/115/539/1386/4695/4696/521/10476/2260/55967/4706/1355/126328/10632/6655/1345/6604/4713/6197/2181/51422/7248/1351/1376/514/2778/51241/65260/51287/4715/79133/1374/4712/1350/25915/7249/10975/4709/6009/4700/516/91942/7381/6391/5564/6196/51079/64223/1329/4881/108/4697/4701/4719/4724/10488/123096/84987/28958/29796/1349/29078/515/116228/4…
hsa00600	Sphingolipid metabolism	46	-0.33673	-1.03101	0.389344	0.711674	0.526911	3209	tags=30%, list=16%, signal=26%	8611/57704/4758/29956/55304/427/8613/8612/10558/253782/123099/339221/9331/79603
hsa05033	Nicotine addiction	39	-0.346377	-1.02015	0.386029	0.711674	0.526911	7879	tags=49%, list=39%, signal=30%	2560/2890/2554/2893/116444/246213/2567/774/2561/2558/2555/2569/2565/2891/2905/2563/2892/2562/2564
hsa00140	Steroid hormone biosynthesis	51	-0.362039	-1.13676	0.253219	0.574848	0.425608	1385	tags=14%, list=7%, signal=13%	8644/374875/8630/220074/79154/7923/3291
hsa00650	Butanoate metabolism	26	-0.366387	-1.0031	0.44164	0.756276	0.559934	4985	tags=35%, list=25%, signal=26%	64064/79944/54988/3155/3033/18/7915/56898/622
hsa04146	Peroxisome	82	-0.391904	-1.35707	0.0352941	0.130289	0.096464	2840	tags=35%, list=14%, signal=31%	3155/55670/1891/10455/283927/25824/5827/5194/5192/5828/8528/8504/5825/8309/847/10654/4358/5824/10005/5264/5191/5190/83594/255027/55825/11264/23600/2053/8800
hsa00062	Fatty acid elongation	25	-0.393247	-1.05557	0.376206	0.709635	0.525402	4427	tags=48%, list=22%, signal=38%	51144/6785/201562/79993/117145/51495/3033/9200/51102/10965/10449/54898
hsa00072	Synthesis and degradation of ketone bodies	10	-0.393725	-0.858876	0.640693	0.925253	0.685042	2840	tags=50%, list=14%, signal=43%	54511/64064/3155/56898/622
hsa04614	Renin-angiotensin system	22	-0.395404	-1.04025	0.411765	0.726717	0.538049	107	tags=14%, list=1%, signal=14%	5972/2028/185
hsa00040	Pentose and glucuronate interconversions	23	-0.40192	-1.06399	0.389571	0.711674	0.526911	2238	tags=22%, list=11%, signal=19%	51181/51084/27294/6652/9365
hsa03010	Ribosome	124	-0.403286	-1.49213	0.00909091	0.0391148	0.02896	8937	tags=56%, list=44%, signal=32%	6202/6133/3921/6135/6218/64963/6156/6205/11224/51373/6159/6161/6188/6122/55052/6166/6124/6164/9801/64979/29074/6194/6232/4736/25873/6146/6204/64928/6152/28998/6136/9553/6139/54460/55173/64965/6210/51263/6168/29093/51121/6165/63875/6233/9045/6228/63931/51065/51264/65008/51187/79590/51081/124995/6138/6150/64981/219927/51023/64983/6160/6227/51318/6224/51069/6167/6234/64968/6235/6192
hsa03020	RNA polymerase	30	-0.409331	-1.17102	0.205047	0.49667	0.367726	5891	tags=43%, list=29%, signal=31%	5440/5437/5439/10621/55703/64425/5432/5435/51728/9533/5438/84172/5441
hsa00970	Aminoacyl-tRNA biosynthesis	24	-0.427719	-1.14266	0.258675	0.579361	0.428949	5588	tags=38%, list=27%, signal=27%	57176/283459/79731/124454/10056/25973/54938/10352/118672
hsa00190	Oxidative phosphorylation	117	-0.432065	-1.59813	0.00833333	0.0363333	0.0269006	6633	tags=52%, list=33%, signal=35%	341947/1347/51382/9167/517/523/518/4716/4694/4714/4722/4711/4698/513/4725/1537/539/4695/4696/521/10476/55967/4706/1355/126328/10632/90423/1345/4713/528/1351/514/4715/4712/1350/535/10975/534/4709/4700/516/7381/6391/51079/1329/4697/9550/4701/4719/495/4724/50617/29796/1349/515/4708/4717/1353/64077/84701/56901
hsa00640	Propanoate metabolism	34	-0.445173	-1.28525	0.135231	0.371602	0.275128	5569	tags=50%, list=27%, signal=36%	31/51/3945/8803/4594/593/84693/5096/32/8802/1629/5095/18/4329/26275/594/79611
hsa00515	Mannose type O-glycan biosynthesis	22	-0.447956	-1.17851	0.244118	0.566145	0.419164	1831	tags=41%, list=9%, signal=37%	9215/6487/11041/2218/55624/9486/27087/10329/84892
hsa04742	Taste transduction	75	-0.459534	-1.57679	0.00529101	0.02403	0.0177914	3193	tags=17%, list=16%, signal=15%	54429/3354/3355/50840/8645/9568/5137/6340/6328/5136/5332/114/1131
hsa04710	Circadian rhythm	30	-0.466504	-1.33458	0.100946	0.300086	0.222179	6775	tags=60%, list=33%, signal=40%	9572/9978/9575/5571/26224/406/1407/5187/51422/8864/6500/5564/1408/6097/8863/6095/5563/79365
hsa00630	Glyoxylate and dicarboxylate metabolism	30	-0.466747	-1.33528	0.100946	0.300086	0.222179	4088	tags=40%, list=20%, signal=32%	84693/5096/6470/9380/112817/5095/81888/48/847/275/125061/2653
hsa00260	Glycine, serine and threonine metabolism	38	-0.466871	-1.36392	0.0902256	0.273183	0.20226	5171	tags=53%, list=25%, signal=39%	635/64902/501/8639/27232/55349/6470/9380/113675/2628/5723/875/4129/23464/275/2653/29958/26227/5224/4128
hsa00053	Ascorbate and aldarate metabolism	21	-0.472603	-1.22844	0.194842	0.486362	0.360094	1307	tags=29%, list=6%, signal=27%	501/55586/223/224/9104/9365
hsa00410	beta-Alanine metabolism	30	-0.512378	-1.46582	0.0536278	0.178942	0.132485	5614	tags=43%, list=28%, signal=31%	314/51/501/218/1806/8639/223/18/84735/4329/26275/224/57571
hsa00220	Arginine biosynthesis	21	-0.551293	-1.43298	0.0601719	0.192904	0.142823	3661	tags=33%, list=18%, signal=27%	4842/1373/435/445/162417/27165/384
hsa04964	Proximal tubule bicarbonate reclamation	22	-0.596497	-1.5693	0.0411765	0.146355	0.108359	2446	tags=27%, list=12%, signal=24%	5105/482/8671/27165/477/762
hsa00910	Nitrogen metabolism	17	-0.62272	-1.52744	0.0546875	0.179349	0.132787	2889	tags=35%, list=14%, signal=30%	1373/765/377677/761/771/762
hsa00430	Taurine and hypotaurine metabolism	11	-0.626985	-1.38613	0.117381	0.330894	0.244989	3857	tags=36%, list=19%, signal=29%	2678/51380/2686/124975
hsa00563	Glycosylphosphatidylinositol (GPI)-anchor biosynthesis	25	-0.629194	-1.68891	0.0257235	0.0966848	0.0715838	4538	tags=64%, list=22%, signal=50%	9488/8733/5279/10026/9091/84720/128869/84992/8818/55650/5281/51227/9487/80055/5283/2822
hsa00130	Ubiquinone and other terpenoid-quinone biosynthesis	11	-0.71466	-1.57997	0.0361174	0.131226	0.0971579	3772	tags=64%, list=19%, signal=52%	154807/2677/51004/84274/51805/10229/1728

## Sheet: S4
Table S4 Differentially expressed gene in ICIcluster
ICIcluster 1 vs ICIcluster 2								ICIcluster 2 vs ICIcluster 3								ICIcluster 1 vs ICIcluster 3
gene	conMean	treatMean	logFC	pValue	FDR	type		gene	conMean	treatMean	logFC	pValue	FDR	type		gene	conMean	treatMean	logFC	pValue	FDR	type
PAX2	0.427011	0.00621983	-6.10125	1.08e-09	4.24e-09	Down-regulated Gene		PSG8	1.77265	0.499238	-1.8281	0.00311852	0.00733191	Down-regulated Gene		PAX2	0.427011	0.00488882	-6.44864	3.05e-06	6.35e-06	Down-regulated Gene
COL9A3	100.574	1.87525	-5.74503	3.52e-13	2.22e-12	Down-regulated Gene		GZMK	1.18661	4.1366	1.8016	1.47e-14	7.94e-13	Up-regulated Gene		COL9A3	100.574	2.11906	-5.56869	4.98e-12	1.84e-11	Down-regulated Gene
ARSF	1.20211	0.0296219	-5.34276	1.38e-10	6.1e-10	Down-regulated Gene		TLR10	0.227817	0.794999	1.80308	7.06e-10	1.06e-08	Up-regulated Gene		PPY	2.76395	0.0676087	-5.35338	6.8e-09	1.84e-08	Down-regulated Gene
KRT85	0.837716	0.0245911	-5.09025	7.11e-07	1.94e-06	Down-regulated Gene		LAMA3	0.281714	0.98355	1.80377	3.38e-07	2.41e-06	Up-regulated Gene		ARSF	1.20211	0.0322737	-5.21907	3.48e-12	1.3e-11	Down-regulated Gene
RAG2	3.28508	0.100982	-5.02375	2.62e-15	2.31e-14	Down-regulated Gene		IL7R	1.25946	4.41721	1.81033	1.38e-21	2.72e-18	Up-regulated Gene		MLN	0.857103	0.0311682	-4.78132	0.00027	0.00046064	Down-regulated Gene
BCAN	1.0039	0.0315925	-4.98989	0.00063743	0.00114385	Down-regulated Gene		SERPINA5	0.0663186	0.235155	1.82613	3.95e-07	2.76e-06	Up-regulated Gene		NPY	17.2378	0.728493	-4.56452	4.29e-06	8.79e-06	Down-regulated Gene
HMGCS2	1.07683	0.0429891	-4.64667	3.41e-12	1.87e-11	Down-regulated Gene		IGJ	41.6604	147.951	1.82837	1.49e-10	2.7e-09	Up-regulated Gene		SFRP1	32.3502	1.45556	-4.47413	0.00191738	0.00294152	Down-regulated Gene
AKR1C2	3.98569	0.159675	-4.64162	1.04e-06	2.77e-06	Down-regulated Gene		POU2AF1	0.823274	2.93261	1.83274	1.53e-05	6.96e-05	Up-regulated Gene		HMGCS2	1.07683	0.0496115	-4.43997	2.16e-09	6.17e-09	Down-regulated Gene
PPY	2.76395	0.12393	-4.47913	2.31e-13	1.5e-12	Down-regulated Gene		TXLNB	0.0687043	0.245604	1.83786	6.25e-14	2.78e-12	Up-regulated Gene		KCNK16	1.99815	0.118281	-4.07838	4.02e-17	2.51e-16	Down-regulated Gene
NPY	17.2378	0.8067	-4.4174	1.28e-07	3.82e-07	Down-regulated Gene		TNFRSF17	0.865831	3.11153	1.84547	2.73e-09	3.49e-08	Up-regulated Gene		CUX2	2.19942	0.130276	-4.07748	1.63e-10	5.23e-10	Down-regulated Gene
SFRP1	32.3502	1.74045	-4.21625	2.41e-08	7.96e-08	Down-regulated Gene		TNNI2	0.37925	1.36701	1.8498	3.83e-07	2.69e-06	Up-regulated Gene		LEFTY2	0.413493	0.0251887	-4.03702	0.00062383	0.00101992	Down-regulated Gene
PRRT4	3.21977	0.173454	-4.21434	1.24e-12	7.21e-12	Down-regulated Gene		TRAT1	0.175779	0.63846	1.86083	1.28e-16	1.41e-14	Up-regulated Gene		RAG2	3.28508	0.205882	-3.99604	5.55e-12	2.04e-11	Down-regulated Gene
FER1L6	0.606953	0.0365507	-4.05361	4.76e-19	7.86e-18	Down-regulated Gene		AMPD1	0.12234	0.451692	1.88445	2.09e-10	3.62e-09	Up-regulated Gene		PRRT4	3.21977	0.202241	-3.99281	3.06e-10	9.59e-10	Down-regulated Gene
LEFTY2	0.413493	0.0252292	-4.0347	3.21e-05	6.93e-05	Down-regulated Gene		FLT3	0.0871059	0.328108	1.91333	3.51e-20	1.93e-17	Up-regulated Gene		BTBD17	1.11846	0.0728212	-3.94101	2.75e-18	1.95e-17	Down-regulated Gene
CNTNAP2	0.873053	0.0548592	-3.99227	3.25e-11	1.56e-10	Down-regulated Gene		FCRL5	0.167356	0.634606	1.92294	1.75e-12	5.33e-11	Up-regulated Gene		APOA1	8.98781	0.593475	-3.92071	8.62e-20	7.16e-19	Down-regulated Gene
MLN	0.857103	0.0547917	-3.96744	0.0004178	0.00077009	Down-regulated Gene		LAX1	0.352053	1.3427	1.93127	1.48e-14	7.98e-13	Up-regulated Gene		PAX1	0.600094	0.0465179	-3.68933	2.68e-07	6.25e-07	Down-regulated Gene
IGF2BP3	0.735694	0.049095	-3.90546	3.3e-06	8.18e-06	Down-regulated Gene		SFTPA1	12.7943	50.095	1.96916	0.000875	0.0024058	Up-regulated Gene		MMEL1	0.771284	0.0599645	-3.68508	7.52e-17	4.54e-16	Down-regulated Gene
APOA4	0.537402	0.0414438	-3.69677	5.35e-20	1.07e-18	Down-regulated Gene		CCR7	0.87334	3.43202	1.97444	2.69e-17	3.78e-15	Up-regulated Gene		CNTNAP2	0.873053	0.0702613	-3.63527	0.00018195	0.00031597	Down-regulated Gene
NR0B2	0.73061	0.0564644	-3.69369	1.78e-05	4e-05	Down-regulated Gene		BTLA	0.152044	0.598303	1.97639	2.36e-15	1.63e-13	Up-regulated Gene		SLC14A2	3.26447	0.274296	-3.57304	1.37e-09	4e-09	Down-regulated Gene
BMP8A	12.3243	1.00126	-3.62162	2.73e-16	2.78e-15	Down-regulated Gene		LILRA4	0.0934505	0.36866	1.98002	3.82e-14	1.77e-12	Up-regulated Gene		GLDC	3.72611	0.315755	-3.5608	5.29e-07	1.19e-06	Down-regulated Gene
KCNJ1	1.44031	0.118297	-3.60589	5.39e-06	1.3e-05	Down-regulated Gene		GREM1	0.188007	0.74392	1.98436	4.13e-09	4.99e-08	Up-regulated Gene		APOA4	0.537402	0.0457332	-3.55469	1.07e-20	9.86e-20	Down-regulated Gene
APOA1	8.98781	0.835578	-3.42712	1.79e-17	2.26e-16	Down-regulated Gene		AIM2	0.26786	1.07926	2.01048	1.75e-13	7.02e-12	Up-regulated Gene		TRIM50	0.708745	0.0604727	-3.55091	0.00038841	0.00065077	Down-regulated Gene
PAX1	0.600094	0.0564401	-3.4104	1.55e-09	5.97e-09	Down-regulated Gene		XCR1	0.0901471	0.363404	2.01122	5.43e-14	2.44e-12	Up-regulated Gene		ETNPPL	0.882845	0.0792739	-3.47724	9.84e-21	9.11e-20	Down-regulated Gene
MMEL1	0.771284	0.0729066	-3.40314	8.25e-19	1.3e-17	Down-regulated Gene		IGLL1	0.101691	0.412113	2.01884	0.00037841	0.00116377	Up-regulated Gene		KIF1A	1.43527	0.134055	-3.42043	5.21e-17	3.19e-16	Down-regulated Gene
SEMA3D	9.0097	0.925316	-3.28346	6.61e-20	1.3e-18	Down-regulated Gene		SAA2	0.211735	0.865282	2.03091	0.00120383	0.00319638	Up-regulated Gene		KLK15	0.586069	0.0554805	-3.40102	3.83e-07	8.78e-07	Down-regulated Gene
SLC14A2	3.26447	0.350996	-3.21732	8.18e-13	4.88e-12	Down-regulated Gene		SFTPA2	3.46976	14.3003	2.04314	0.00010946	0.00039337	Up-regulated Gene		MT1H	112.22	11.7066	-3.26093	1.08e-11	3.88e-11	Down-regulated Gene
RGS8	2.4901	0.271555	-3.19689	1.74e-16	1.84e-15	Down-regulated Gene		CNR2	0.0498089	0.206609	2.05242	1.5e-09	2.08e-08	Up-regulated Gene		KCNJ1	1.44031	0.153474	-3.23031	0.00038723	0.00064888	Down-regulated Gene
TCEAL6	0.351535	0.0383505	-3.19635	0.0002671	0.00050666	Down-regulated Gene		UBD	0.945579	4.07451	2.10736	1.36e-12	4.23e-11	Up-regulated Gene		GATA5	2.71389	0.291138	-3.22059	7.1e-13	2.84e-12	Down-regulated Gene
BTBD17	1.11846	0.132324	-3.07936	7.02e-19	1.13e-17	Down-regulated Gene		CCL21	14.7171	64.6493	2.13514	3.7e-08	3.44e-07	Up-regulated Gene		NAT16	1.55596	0.169573	-3.19783	5.37e-15	2.65e-14	Down-regulated Gene
TRIM50	0.708745	0.0865161	-3.03423	0.00018419	0.00035779	Down-regulated Gene		RP11-812E19.9	0.471705	2.08133	2.14155	1.06e-09	1.53e-08	Up-regulated Gene		SEMA3D	9.0097	1.0209	-3.14164	4.21e-13	1.72e-12	Down-regulated Gene
NEB	1.00935	0.128049	-2.97866	4.87e-19	8.02e-18	Down-regulated Gene		IGLL5	12.7322	56.4603	2.14876	9.26e-10	1.35e-08	Up-regulated Gene		CIB4	2.49608	0.286366	-3.12373	7.13e-17	4.32e-16	Down-regulated Gene
CUX2	2.19942	0.279147	-2.97802	1.62e-14	1.25e-13	Down-regulated Gene		CLEC17A	0.0699796	0.319026	2.18867	5.16e-09	6.04e-08	Up-regulated Gene		DIO1	112.547	13.2079	-3.09106	1.23e-22	1.44e-21	Down-regulated Gene
LMX1B	0.308733	0.0400889	-2.94508	2.13e-06	5.41e-06	Down-regulated Gene		CD79A	6.25936	28.6659	2.19525	1.27e-10	2.36e-09	Up-regulated Gene		FER1L6	0.606953	0.0716491	-3.08256	2.26e-12	8.62e-12	Down-regulated Gene
CIB4	2.49608	0.324392	-2.94385	2.08e-18	3.07e-17	Down-regulated Gene		TNNT3	0.142462	0.660987	2.21404	0.00037083	0.00114457	Up-regulated Gene		CLCNKA	4.12136	0.494287	-3.0597	4.13e-24	5.72e-23	Down-regulated Gene
T	0.317647	0.0412828	-2.94381	2.77e-11	1.34e-10	Down-regulated Gene		STAP1	0.217363	1.01226	2.2194	2.06e-11	4.73e-10	Up-regulated Gene		MT1G	911.893	110.367	-3.04656	2.37e-17	1.51e-16	Down-regulated Gene
AKR1C1	2.1304	0.281295	-2.92097	5.42e-10	2.22e-09	Down-regulated Gene		PLA2G2D	0.479386	2.26253	2.23868	9.01e-08	7.52e-07	Up-regulated Gene		CNTFR	7.16352	0.891369	-3.00657	2e-08	5.2e-08	Down-regulated Gene
SCUBE1	2.14546	0.288333	-2.89548	1.04e-08	3.59e-08	Down-regulated Gene		FCRL2	0.0730275	0.344771	2.23913	5.9e-10	9.07e-09	Up-regulated Gene		ENPP3	2.38387	0.299712	-2.99166	9.7e-09	2.59e-08	Down-regulated Gene
SLC5A5	8.11799	1.09252	-2.89346	9.75e-05	0.00019711	Down-regulated Gene		TNFRSF13C	0.258302	1.26645	2.29366	3.31e-08	3.13e-07	Up-regulated Gene		NR0B2	0.73061	0.0953624	-2.93761	0.00069152	0.00112483	Down-regulated Gene
SERPIND1	0.493475	0.0665956	-2.88948	1.74e-06	4.47e-06	Down-regulated Gene		SAA1	1.1524	5.71559	2.31026	0.00027643	0.00088187	Up-regulated Gene		MROH2A	1.27105	0.171803	-2.88719	0.0003748	0.00062925	Down-regulated Gene
ZMAT4	4.7594	0.644798	-2.88386	6.24e-23	2.26e-21	Down-regulated Gene		BPIFB1	0.200488	0.999242	2.31732	2.15e-06	1.25e-05	Up-regulated Gene		NXPH4	1.88878	0.265907	-2.82846	0.00410198	0.00603766	Down-regulated Gene
SCGB3A2	0.572135	0.0775319	-2.88349	2.17e-05	4.81e-05	Down-regulated Gene		FCRL3	0.122215	0.619871	2.34255	3.57e-13	1.32e-11	Up-regulated Gene		CARTPT	31.1876	4.4168	-2.8199	9.13e-10	2.71e-09	Down-regulated Gene
TPO	476.328	65.1999	-2.86901	6.77e-22	1.99e-20	Down-regulated Gene		CLCA2	0.212351	1.09454	2.36581	0.00045531	0.00136583	Up-regulated Gene		SLC5A1	0.312497	0.0443818	-2.8158	0.00647683	0.00930414	Down-regulated Gene
SLC5A7	0.323329	0.0450817	-2.84239	7.07e-09	2.49e-08	Down-regulated Gene		VPREB3	0.588315	3.10377	2.39936	0.00114255	0.00304895	Up-regulated Gene		ADIG	1.62939	0.234557	-2.79633	2.09e-19	1.68e-18	Down-regulated Gene
LINGO2	1.01885	0.144704	-2.81576	1.2e-19	2.23e-18	Down-regulated Gene		MS4A1	0.775273	4.12406	2.41129	2.56e-10	4.31e-09	Up-regulated Gene		INHBE	0.297489	0.043683	-2.76769	3.8e-07	8.71e-07	Down-regulated Gene
INHBE	0.297489	0.0422915	-2.8144	2.37e-08	7.82e-08	Down-regulated Gene		CLEC4G	0.0667135	0.363724	2.44679	1.28e-07	1.03e-06	Up-regulated Gene		FLRT1	2.95505	0.442999	-2.73781	1.76e-24	2.54e-23	Down-regulated Gene
MROH2A	1.27105	0.181458	-2.80831	9.36e-05	0.00018954	Down-regulated Gene		CXCL13	2.57852	14.2813	2.46951	1.49e-10	2.7e-09	Up-regulated Gene		ALDH1L1	0.912184	0.138247	-2.72207	8.03e-18	5.4e-17	Down-regulated Gene
IRX6	1.72192	0.253424	-2.76439	1.61e-17	2.04e-16	Down-regulated Gene		P2RX5	0.0993519	0.55636	2.4854	9.96e-09	1.08e-07	Up-regulated Gene		LINGO2	1.01885	0.154703	-2.71937	1.05e-15	5.58e-15	Down-regulated Gene
ETNPPL	0.882845	0.130638	-2.75659	4.47e-21	1.11e-19	Down-regulated Gene		CCL19	6.64822	38.3279	2.52736	3.9e-12	1.09e-10	Up-regulated Gene		SLC5A7	0.323329	0.0491763	-2.71697	5.88e-05	0.00010759	Down-regulated Gene
MAFA	0.736518	0.109267	-2.75286	0.00056767	0.00102804	Down-regulated Gene		FAM129C	0.0587726	0.342145	2.5414	1.8e-08	1.83e-07	Up-regulated Gene		SLC47A2	0.946365	0.146947	-2.6871	2.13e-09	6.09e-09	Down-regulated Gene
SLC5A1	0.312497	0.0468848	-2.73665	1.44e-07	4.3e-07	Down-regulated Gene		KRT5	0.857864	5.10085	2.57192	0.00184965	0.00465115	Up-regulated Gene		SCUBE1	2.14546	0.333459	-2.68571	7.41e-07	1.64e-06	Down-regulated Gene
FLRT1	2.95505	0.451253	-2.71118	1.48e-26	1.37e-24	Down-regulated Gene		CASQ1	0.0733722	0.43726	2.57519	2.46e-07	1.82e-06	Up-regulated Gene		RGS8	2.4901	0.393444	-2.66197	1.72e-10	5.5e-10	Down-regulated Gene
GLDC	3.72611	0.570811	-2.70658	2.04e-12	1.15e-11	Down-regulated Gene		CD19	0.31897	2.02191	2.66422	1.51e-09	2.09e-08	Up-regulated Gene		TEKT4	0.606879	0.0963152	-2.65557	1.27e-20	1.16e-19	Down-regulated Gene
ENPP3	2.38387	0.366971	-2.69957	6.34e-13	3.84e-12	Down-regulated Gene		SPIB	0.139181	0.891936	2.67998	2.96e-12	8.48e-11	Up-regulated Gene		BMP8A	12.3243	1.9679	-2.64677	1.67e-09	4.83e-09	Down-regulated Gene
IRS4	0.414253	0.0638511	-2.69773	3.24e-15	2.8e-14	Down-regulated Gene		BLK	0.104462	0.691774	2.72733	8.23e-11	1.63e-09	Up-regulated Gene		TPO	476.328	76.119	-2.64563	8.2e-19	6.14e-18	Down-regulated Gene
TECTB	0.253191	0.0390975	-2.69508	3.87e-23	1.47e-21	Down-regulated Gene		FCRLA	0.204942	1.39619	2.76821	6.76e-11	1.37e-09	Up-regulated Gene		STXBP5L	1.33372	0.213583	-2.64259	1.96e-23	2.53e-22	Down-regulated Gene
KCNK16	1.99815	0.308582	-2.69494	7.15e-16	6.86e-15	Down-regulated Gene		SAA2-SAA4	0.0403912	0.292577	2.8567	8.46e-06	4.12e-05	Up-regulated Gene		MT1HL1	0.323979	0.0518907	-2.64235	7.66e-21	7.22e-20	Down-regulated Gene
DIO1	112.547	17.3892	-2.69427	7.21e-25	4.3e-23	Down-regulated Gene		FCRL1	0.0566082	0.418905	2.88754	5.53e-13	1.95e-11	Up-regulated Gene		IRS4	0.414253	0.0664986	-2.63912	1.77e-13	7.53e-13	Down-regulated Gene
NAT16	1.55596	0.240665	-2.6927	4.96e-16	4.87e-15	Down-regulated Gene		CD5L	0.0410909	0.317631	2.95046	8.03e-07	5.19e-06	Up-regulated Gene		SFTPC	0.826148	0.13385	-2.62578	1.06e-24	1.58e-23	Down-regulated Gene
SLC47A2	0.946365	0.148288	-2.67399	0.00434645	0.0068443	Down-regulated Gene		PAX5	0.0627637	0.633364	3.33503	4.17e-12	1.15e-10	Up-regulated Gene		MT3	1.04322	0.169154	-2.62463	0.00092946	0.00148485	Down-regulated Gene
FAM196B	0.260502	0.0412126	-2.66014	5.3e-09	1.9e-08	Down-regulated Gene		CR2	0.404454	4.12621	3.35077	2.53e-05	0.00010861	Up-regulated Gene		SLC25A47	0.444456	0.0725722	-2.61455	3.43e-18	2.4e-17	Down-regulated Gene
MRO	1.8683	0.297804	-2.64929	6.8e-25	4.07e-23	Down-regulated Gene		FCER2	0.112196	1.14626	3.35284	2.26e-12	6.7e-11	Up-regulated Gene		SELV	3.27394	0.539461	-2.60144	1.19e-18	8.7e-18	Down-regulated Gene
CARTPT	31.1876	5.06878	-2.62126	5.96e-13	3.63e-12	Down-regulated Gene		FDCSP	1.41308	15.5611	3.46102	3.76e-07	2.65e-06	Up-regulated Gene		OLFM4	0.435783	0.072128	-2.59498	0.00025729	0.00044028	Down-regulated Gene
SLC29A4	4.47025	0.730128	-2.61414	2.14e-20	4.65e-19	Down-regulated Gene		FCAMR	0.0376433	0.473739	3.65363	1.13e-06	7.03e-06	Up-regulated Gene		TECTB	0.253191	0.0420893	-2.5887	2.17e-20	1.93e-19	Down-regulated Gene
KIF19	1.15533	0.18985	-2.60537	7.62e-15	6.2e-14	Down-regulated Gene		TCL1A	0.15088	1.9986	3.72751	1.23e-09	1.74e-08	Up-regulated Gene		MT1F	142.137	23.6991	-2.58438	8.42e-20	7.01e-19	Down-regulated Gene
OLFM4	0.435783	0.071703	-2.60351	1.21e-06	3.19e-06	Down-regulated Gene		SERPINA9	0.029928	0.40175	3.74673	1.27e-10	2.37e-09	Up-regulated Gene		CRABP1	77.1132	13.2523	-2.54074	3.37e-09	9.45e-09	Down-regulated Gene
SLC5A8	13.2062	2.19061	-2.59181	2.08e-21	5.55e-20	Down-regulated Gene		XIRP1	0.0273094	0.527891	4.27277	2.68e-09	3.44e-08	Up-regulated Gene		PLEKHD1	0.823799	0.141933	-2.53708	2.93e-22	3.24e-21	Down-regulated Gene
STXBP5L	1.33372	0.222903	-2.58097	1.95e-24	1.03e-22	Down-regulated Gene		CKM	0.0504834	3.5253	6.12579	1.57e-05	7.08e-05	Up-regulated Gene		SLC29A4	4.47025	0.771679	-2.53429	1.42e-18	1.03e-17	Down-regulated Gene
PKHD1L1	8.20768	1.37737	-2.57506	8.38e-17	9.4e-16	Down-regulated Gene		MYH7	0.0122443	1.38599	6.82266	8.11e-05	0.00030224	Up-regulated Gene		SLC5A8	13.2062	2.33493	-2.49976	6.53e-21	6.21e-20	Down-regulated Gene
ZNF536	0.426058	0.0717033	-2.57094	4.05e-20	8.25e-19	Down-regulated Gene		MYL2	0.013266	1.81777	7.09829	3.94e-06	2.11e-05	Up-regulated Gene		AQP7	1.07399	0.189927	-2.49946	4.06e-09	1.13e-08	Down-regulated Gene
FAM163A	0.689803	0.116449	-2.56648	4.11e-13	2.57e-12	Down-regulated Gene										ASTN1	0.278051	0.0492226	-2.49796	0.00519261	0.0075517	Down-regulated Gene
PLEKHD1	0.823799	0.140052	-2.55633	1.21e-24	6.76e-23	Down-regulated Gene										PPP2R2C	0.242475	0.043391	-2.48236	1.32e-05	2.59e-05	Down-regulated Gene
CDH16	12.876	2.20103	-2.54844	3.19e-14	2.35e-13	Down-regulated Gene										T	0.317647	0.0578367	-2.45737	3.43e-06	7.11e-06	Down-regulated Gene
NXPH4	1.88878	0.325065	-2.53866	5e-05	0.00010501	Down-regulated Gene										ZMAT4	4.7594	0.867975	-2.45505	5.56e-19	4.24e-18	Down-regulated Gene
KIF1A	1.43527	0.248865	-2.52789	1.36e-14	1.07e-13	Down-regulated Gene										ABCC8	2.57802	0.470218	-2.45486	6.53e-21	6.21e-20	Down-regulated Gene
ADIG	1.62939	0.284027	-2.52024	2.19e-18	3.22e-17	Down-regulated Gene										CAPSL	3.82293	0.699841	-2.44958	2.31e-18	1.65e-17	Down-regulated Gene
MT1H	112.22	19.8372	-2.50005	2.5e-12	1.39e-11	Down-regulated Gene										MRO	1.8683	0.346685	-2.43003	7.83e-21	7.37e-20	Down-regulated Gene
SERTM1	3.07434	0.546608	-2.4917	6.17e-10	2.5e-09	Down-regulated Gene										WNT4	2.90214	0.540667	-2.4243	4.5e-23	5.58e-22	Down-regulated Gene
MAPK4	1.6781	0.299819	-2.48466	5.02e-18	6.96e-17	Down-regulated Gene										GOLGA8M	1.929	0.360575	-2.41948	2.27e-25	3.7e-24	Down-regulated Gene
WSCD2	6.1403	1.10739	-2.47115	4.87e-19	8.02e-18	Down-regulated Gene										EBF4	21.7806	4.1016	-2.40879	1.03e-21	1.08e-20	Down-regulated Gene
HHIPL2	1.82014	0.334933	-2.44211	9e-08	2.75e-07	Down-regulated Gene										SERTM1	3.07434	0.581648	-2.40206	1.04e-09	3.08e-09	Down-regulated Gene
CLCNKA	4.12136	0.771446	-2.41748	1.05e-21	2.98e-20	Down-regulated Gene										MAPK4	1.6781	0.318306	-2.39834	1.64e-13	7.01e-13	Down-regulated Gene
PYGM	3.13851	0.587564	-2.41726	7.42e-20	1.44e-18	Down-regulated Gene										SLC30A8	0.305589	0.0580547	-2.39611	2.31e-12	8.82e-12	Down-regulated Gene
TRAPPC3L	0.660716	0.124565	-2.40713	1.85e-12	1.05e-11	Down-regulated Gene										ZNF536	0.426058	0.0834794	-2.35156	2.44e-17	1.56e-16	Down-regulated Gene
SLC6A17	0.439546	0.0839707	-2.38806	1.57e-14	1.22e-13	Down-regulated Gene										FAM163A	0.689803	0.1353	-2.35002	3.31e-07	7.64e-07	Down-regulated Gene
MT1G	911.893	174.551	-2.38521	1.49e-17	1.9e-16	Down-regulated Gene										CSMD1	0.787354	0.155281	-2.34214	7.91e-08	1.93e-07	Down-regulated Gene
LRP1B	0.744882	0.143512	-2.37584	6.1e-19	9.87e-18	Down-regulated Gene										SPX	6.44619	1.27441	-2.33862	9.16e-27	1.77e-25	Down-regulated Gene
ABCC8	2.57802	0.500922	-2.36361	4.52e-21	1.13e-19	Down-regulated Gene										OTOS	62.6178	12.3928	-2.33706	5.51e-20	4.67e-19	Down-regulated Gene
IPCEF1	4.97972	0.970045	-2.35994	1.42e-17	1.83e-16	Down-regulated Gene										SLC6A17	0.439546	0.0880566	-2.31951	1.65e-11	5.81e-11	Down-regulated Gene
GDF10	2.15582	0.421983	-2.35298	0.00142896	0.00242579	Down-regulated Gene										HGD	17.4517	3.51363	-2.31233	6.92e-22	7.35e-21	Down-regulated Gene
HGD	17.4517	3.45454	-2.3368	9.88e-23	3.46e-21	Down-regulated Gene										KCNK17	4.27243	0.862782	-2.30799	3.71e-05	6.93e-05	Down-regulated Gene
ZNF804B	0.833298	0.166835	-2.32041	1.59e-13	1.05e-12	Down-regulated Gene										SLC4A4	8.3613	1.69659	-2.30109	1.07e-24	1.58e-23	Down-regulated Gene
CNTFR	7.16352	1.43458	-2.32004	6.85e-09	2.41e-08	Down-regulated Gene										CACNB4	0.60709	0.124005	-2.29151	3.39e-18	2.38e-17	Down-regulated Gene
BARX2	0.280037	0.0566551	-2.30534	2.91e-06	7.26e-06	Down-regulated Gene										GRIK4	1.33623	0.273981	-2.28602	2.83e-20	2.49e-19	Down-regulated Gene
SLC4A4	8.3613	1.70318	-2.2955	6.17e-25	3.74e-23	Down-regulated Gene										GCK	0.408811	0.0842072	-2.27942	3.29e-11	1.13e-10	Down-regulated Gene
GRIN2C	5.17872	1.0715	-2.27297	1.14e-19	2.12e-18	Down-regulated Gene										CDH16	12.876	2.65992	-2.27523	4.67e-09	1.29e-08	Down-regulated Gene
TFCP2L1	8.00831	1.65814	-2.27193	7.98e-21	1.88e-19	Down-regulated Gene										POPDC3	0.966171	0.200933	-2.26557	1.87e-07	4.42e-07	Down-regulated Gene
MIOX	7.66997	1.60578	-2.25595	7.3e-19	1.16e-17	Down-regulated Gene										GABRQ	0.371496	0.0778387	-2.25479	0.0008008	0.0012904	Down-regulated Gene
TEKT4	0.606879	0.127283	-2.25337	8.42e-19	1.33e-17	Down-regulated Gene										PIP	0.589363	0.124389	-2.2443	1.3e-09	3.8e-09	Down-regulated Gene
HAP1	0.850225	0.180063	-2.23935	2.41e-16	2.48e-15	Down-regulated Gene										TRAPPC3L	0.660716	0.13973	-2.24139	2.3e-10	7.28e-10	Down-regulated Gene
MT1F	142.137	30.2514	-2.23221	6.03e-20	1.19e-18	Down-regulated Gene										GOLGA8Q	0.502585	0.107507	-2.22493	6.05e-18	4.12e-17	Down-regulated Gene
ALDH1L1	0.912184	0.194335	-2.23078	5.96e-10	2.43e-09	Down-regulated Gene										LGI3	9.57001	2.05114	-2.22209	2.37e-25	3.84e-24	Down-regulated Gene
CACNB4	0.60709	0.130202	-2.22116	1.43e-21	3.94e-20	Down-regulated Gene										CWH43	4.48854	0.968087	-2.21304	1.1e-12	4.34e-12	Down-regulated Gene
IGFBPL1	4.29808	0.923848	-2.21796	1.11e-16	1.22e-15	Down-regulated Gene										C10orf107	1.07838	0.233215	-2.20913	8.21e-06	1.64e-05	Down-regulated Gene
RAG1	0.736065	0.158886	-2.21184	6.31e-18	8.61e-17	Down-regulated Gene										IRX6	1.72192	0.375947	-2.19541	4.91e-15	2.44e-14	Down-regulated Gene
DPP6	2.02129	0.436466	-2.21133	2.52e-14	1.89e-13	Down-regulated Gene										GABRB3	2.37551	0.519208	-2.19385	5.75e-18	3.93e-17	Down-regulated Gene
KANK4	0.637018	0.138861	-2.19769	8.95e-06	2.08e-05	Down-regulated Gene										DLL3	0.458634	0.100659	-2.18787	1.49e-10	4.78e-10	Down-regulated Gene
CAPSL	3.82293	0.836687	-2.19192	7.85e-19	1.24e-17	Down-regulated Gene										WSCD2	6.1403	1.34934	-2.18605	7.03e-15	3.44e-14	Down-regulated Gene
GOLGA8M	1.929	0.424787	-2.18304	3.95e-24	1.9e-22	Down-regulated Gene										OGDHL	12.1933	2.68937	-2.18075	2.53e-21	2.53e-20	Down-regulated Gene
FAM167A	36.0033	7.93392	-2.18202	3.03e-23	1.18e-21	Down-regulated Gene										KIF19	1.15533	0.256008	-2.17404	4.54e-06	9.27e-06	Down-regulated Gene
NIM1K	0.544284	0.120325	-2.17743	9.17e-23	3.23e-21	Down-regulated Gene										LRP1B	0.744882	0.166263	-2.16354	2.64e-15	1.35e-14	Down-regulated Gene
AKR1C3	5.03492	1.11822	-2.17077	9.44e-05	0.00019091	Down-regulated Gene										HHATL	50.3174	11.3394	-2.14971	2.89e-12	1.09e-11	Down-regulated Gene
KCNA2	0.356178	0.0792088	-2.16887	8.34e-09	2.91e-08	Down-regulated Gene										MPPED2	3.8982	0.880722	-2.14605	9.88e-24	1.31e-22	Down-regulated Gene
PRIMA1	0.691914	0.154514	-2.16285	1.99e-13	1.3e-12	Down-regulated Gene										IGDCC3	1.32057	0.299604	-2.14003	1.12e-16	6.63e-16	Down-regulated Gene
SELV	3.27394	0.733525	-2.15811	4.78e-17	5.59e-16	Down-regulated Gene										FAM167A	36.0033	8.20521	-2.13352	3.2e-22	3.53e-21	Down-regulated Gene
GCK	0.408811	0.0921926	-2.14871	7.01e-13	4.21e-12	Down-regulated Gene										RGS17	0.838653	0.191578	-2.13015	3.75e-18	2.61e-17	Down-regulated Gene
ASXL3	0.298953	0.0676062	-2.14469	3.03e-14	2.24e-13	Down-regulated Gene										SH2D6	0.681602	0.15593	-2.12803	1.04e-23	1.38e-22	Down-regulated Gene
SH2D6	0.681602	0.154152	-2.14458	8.21e-25	4.81e-23	Down-regulated Gene										GRIN2C	5.17872	1.18705	-2.12522	1.65e-17	1.07e-16	Down-regulated Gene
HS6ST3	1.07965	0.244331	-2.14366	4.85e-18	6.74e-17	Down-regulated Gene										MAPT	0.52136	0.119549	-2.12467	6.34e-20	5.35e-19	Down-regulated Gene
EPHA5	0.235797	0.0535063	-2.13976	0.00258658	0.00422578	Down-regulated Gene										CYP17A1	1.40759	0.323463	-2.12156	1.21e-25	2.04e-24	Down-regulated Gene
KCNAB1	15.9321	3.62759	-2.13486	2.43e-22	7.7e-21	Down-regulated Gene										HOGA1	0.550258	0.12789	-2.1052	1.44e-13	6.15e-13	Down-regulated Gene
DGKI	3.30525	0.759763	-2.12114	3.42e-22	1.06e-20	Down-regulated Gene										MYH3	1.70667	0.396829	-2.1046	1.97e-11	6.88e-11	Down-regulated Gene
OTOS	62.6178	14.4259	-2.11791	8.73e-19	1.36e-17	Down-regulated Gene										NPPC	2.25867	0.525635	-2.10334	7.42e-08	1.82e-07	Down-regulated Gene
MPPED2	3.8982	0.899565	-2.11551	2.94e-24	1.49e-22	Down-regulated Gene										CKMT2	6.36737	1.48721	-2.09809	4.94e-14	2.21e-13	Down-regulated Gene
NOL4	0.403082	0.0930887	-2.1144	2.12e-13	1.38e-12	Down-regulated Gene										ATRNL1	0.411927	0.0977851	-2.0747	4.18e-08	1.05e-07	Down-regulated Gene
GATA5	2.71389	0.629732	-2.10755	1.03e-12	6.04e-12	Down-regulated Gene										AKR1C1	2.1304	0.50611	-2.0736	1.3e-06	2.8e-06	Down-regulated Gene
EBF4	21.7806	5.08032	-2.10006	6.1e-20	1.2e-18	Down-regulated Gene										TBX22	0.419403	0.0997809	-2.0715	8.33e-14	3.65e-13	Down-regulated Gene
CWH43	4.48854	1.05099	-2.0945	3.34e-15	2.88e-14	Down-regulated Gene										KIAA1324	3.61062	0.860154	-2.06958	2.65e-07	6.17e-07	Down-regulated Gene
NPPC	2.25867	0.530514	-2.09001	8.36e-12	4.35e-11	Down-regulated Gene										FAM196B	0.260502	0.0621852	-2.06665	0.00086762	0.00139188	Down-regulated Gene
GOLGA8Q	0.502585	0.118223	-2.08786	6.46e-17	7.4e-16	Down-regulated Gene										TFF2	0.579629	0.138744	-2.06271	5.99e-09	1.64e-08	Down-regulated Gene
TENM2	0.28655	0.0675014	-2.0858	4.62e-14	3.33e-13	Down-regulated Gene										ATP4A	0.362084	0.0872927	-2.05239	2.45e-18	1.74e-17	Down-regulated Gene
WNT4	2.90214	0.691075	-2.0702	3.34e-24	1.67e-22	Down-regulated Gene										SLITRK5	0.275108	0.0663706	-2.05138	0.00095544	0.00152221	Down-regulated Gene
SLC30A8	0.305589	0.0729494	-2.06662	1.92e-13	1.26e-12	Down-regulated Gene										MSI1	1.82863	0.441332	-2.05083	1.37e-15	7.13e-15	Down-regulated Gene
ST6GAL1	28.0554	6.7867	-2.0475	2.96e-12	1.64e-11	Down-regulated Gene										PTPRQ	0.23829	0.0576846	-2.04646	1.2e-15	6.31e-15	Down-regulated Gene
COL25A1	0.804441	0.19478	-2.04614	2.89e-19	4.98e-18	Down-regulated Gene										NRSN1	0.34094	0.0825586	-2.04603	1.77e-06	3.77e-06	Down-regulated Gene
CRABP1	77.1132	18.6887	-2.04481	3.44e-05	7.4e-05	Down-regulated Gene										DAND5	0.284614	0.0689784	-2.04479	4.3e-14	1.94e-13	Down-regulated Gene
KIT	12.6601	3.09298	-2.03322	3.41e-15	2.93e-14	Down-regulated Gene										TFF3	185.334	45.2826	-2.0331	5.34e-16	2.93e-15	Down-regulated Gene
GRIK4	1.33623	0.32668	-2.03222	3.55e-19	5.97e-18	Down-regulated Gene										SCGB3A2	0.572135	0.140339	-2.02744	4.31e-07	9.81e-07	Down-regulated Gene
C10orf107	1.07838	0.263666	-2.03208	1.94e-09	7.37e-09	Down-regulated Gene										GPR98	0.62813	0.154329	-2.02505	2.49e-22	2.78e-21	Down-regulated Gene
ATP4A	0.362084	0.0899837	-2.00859	2.12e-15	1.89e-14	Down-regulated Gene										MIOX	7.66997	1.88606	-2.02385	1.34e-15	6.99e-15	Down-regulated Gene
ADM2	13.7765	3.43905	-2.00212	1.51e-16	1.62e-15	Down-regulated Gene										HAP1	0.850225	0.209807	-2.01878	1.67e-12	6.48e-12	Down-regulated Gene
RASSF6	0.98325	0.246762	-1.99444	0.00031676	0.0005942	Down-regulated Gene										SOX3	0.985141	0.244102	-2.01285	1.23e-12	4.81e-12	Down-regulated Gene
KCNK17	4.27243	1.07278	-1.9937	3.5e-06	8.63e-06	Down-regulated Gene										INHBC	0.3021	0.0749465	-2.01109	3.81e-18	2.65e-17	Down-regulated Gene
ODAM	0.833742	0.210244	-1.98754	4.31e-11	2.04e-10	Down-regulated Gene										AGTR1	1.33881	0.335585	-1.9962	2.47e-11	8.58e-11	Down-regulated Gene
TFF3	185.334	47.0141	-1.97896	1.48e-19	2.68e-18	Down-regulated Gene										CA4	10.1039	2.53307	-1.99595	1.13e-20	1.03e-19	Down-regulated Gene
GJA3	0.654421	0.167007	-1.97031	0.00119418	0.00205123	Down-regulated Gene										QPRT	8.72353	2.18969	-1.99418	1.49e-10	4.79e-10	Down-regulated Gene
MUM1L1	4.00887	1.02475	-1.96792	2.05e-20	4.46e-19	Down-regulated Gene										ADM2	13.7765	3.47398	-1.98755	8.3e-16	4.45e-15	Down-regulated Gene
CPXM1	21.2507	5.43309	-1.96767	0.00011179	0.00022446	Down-regulated Gene										TFCP2L1	8.00831	2.02405	-1.98425	4.19e-17	2.6e-16	Down-regulated Gene
FAM19A2	2.1322	0.547515	-1.96137	4.86e-05	0.00010238	Down-regulated Gene										NIM1K	0.544284	0.137621	-1.98366	3.51e-16	1.96e-15	Down-regulated Gene
GPR98	0.62813	0.161524	-1.95931	6.56e-23	2.36e-21	Down-regulated Gene										PKNOX2	4.48291	1.13649	-1.97985	1.56e-16	9.1e-16	Down-regulated Gene
GSDMC	0.540622	0.139201	-1.95745	8.44e-05	0.00017192	Down-regulated Gene										PIWIL1	5.91769	1.50478	-1.97549	6.65e-07	1.48e-06	Down-regulated Gene
GABRB3	2.37551	0.613086	-1.95407	3.19e-17	3.85e-16	Down-regulated Gene										NQO1	79.8978	20.3192	-1.97531	7.28e-17	4.4e-16	Down-regulated Gene
DIRAS2	0.997065	0.257612	-1.95249	4.57e-21	1.14e-19	Down-regulated Gene										FGF12	1.58413	0.403053	-1.97465	2.86e-17	1.81e-16	Down-regulated Gene
AGTR1	1.33881	0.347627	-1.94533	8.84e-13	5.25e-12	Down-regulated Gene										KIT	12.6601	3.22676	-1.97213	1.62e-11	5.71e-11	Down-regulated Gene
UGT3A2	0.716645	0.187135	-1.93718	1.45e-06	3.77e-06	Down-regulated Gene										RNF157	1.42584	0.3655	-1.96387	8.52e-14	3.73e-13	Down-regulated Gene
MYH3	1.70667	0.446995	-1.93286	4.65e-09	1.68e-08	Down-regulated Gene										FAM19A2	2.1322	0.547152	-1.96233	0.00022051	0.00037997	Down-regulated Gene
SPX	6.44619	1.693	-1.92886	9.88e-23	3.46e-21	Down-regulated Gene										PYGM	3.13851	0.812598	-1.94947	1.09e-16	6.44e-16	Down-regulated Gene
NWD1	0.50867	0.134134	-1.92305	1.29e-21	3.57e-20	Down-regulated Gene										LDHD	11.4306	2.96297	-1.94778	1.8e-28	4.35e-27	Down-regulated Gene
ASTN1	0.278051	0.0735567	-1.91842	0.00034859	0.00064969	Down-regulated Gene										PPARGC1A	4.70383	1.22247	-1.94404	1.14e-22	1.34e-21	Down-regulated Gene
ELMO1	10.9515	2.90939	-1.91234	1.05e-21	2.98e-20	Down-regulated Gene										RASSF10	0.396683	0.103585	-1.93717	3.22e-06	6.68e-06	Down-regulated Gene
FABP4	14.7005	3.90596	-1.91212	3.18e-13	2.02e-12	Down-regulated Gene										KCNAB1	15.9321	4.16336	-1.93612	7.48e-19	5.62e-18	Down-regulated Gene
MSI1	1.82863	0.48659	-1.90999	1.41e-18	2.13e-17	Down-regulated Gene										DPP6	2.02129	0.529014	-1.9339	1.98e-09	5.69e-09	Down-regulated Gene
SOSTDC1	0.765314	0.203734	-1.90936	1.82e-12	1.04e-11	Down-regulated Gene										SYT13	4.82483	1.26541	-1.93087	6.52e-11	2.19e-10	Down-regulated Gene
TBX22	0.419403	0.11167	-1.90909	1.15e-15	1.07e-14	Down-regulated Gene										ZNF804B	0.833298	0.218594	-1.93058	1.26e-08	3.35e-08	Down-regulated Gene
MT1HL1	0.323979	0.0863237	-1.90807	9.04e-20	1.72e-18	Down-regulated Gene										ASXL3	0.298953	0.0787488	-1.92459	2.41e-09	6.85e-09	Down-regulated Gene
RASSF10	0.396683	0.106736	-1.89394	6.51e-10	2.63e-09	Down-regulated Gene										ENO3	6.09175	1.61912	-1.91165	3.32e-09	9.31e-09	Down-regulated Gene
RNF150	1.90022	0.512529	-1.89046	9.53e-28	1.25e-25	Down-regulated Gene										TRPV6	0.591095	0.15732	-1.90969	1.1e-16	6.5e-16	Down-regulated Gene
KLK15	0.586069	0.159298	-1.87934	8.21e-06	1.92e-05	Down-regulated Gene										SCGB2A1	6.03122	1.60651	-1.90852	1.1e-15	5.81e-15	Down-regulated Gene
SAMD5	1.19015	0.325695	-1.86955	1.12e-12	6.55e-12	Down-regulated Gene										KCTD8	1.96435	0.52488	-1.90399	4.82e-21	4.67e-20	Down-regulated Gene
KLK3	0.819128	0.224331	-1.86846	0.00046227	0.00084729	Down-regulated Gene										HSD11B2	6.50623	1.76223	-1.88442	6.61e-17	4.02e-16	Down-regulated Gene
DLG2	1.17483	0.322746	-1.86398	1.38e-15	1.26e-14	Down-regulated Gene										KCNA2	0.356178	0.0966834	-1.88126	0.00032425	0.0005475	Down-regulated Gene
MAPT	0.52136	0.143722	-1.859	2.14e-20	4.65e-19	Down-regulated Gene										BEX1	21.1534	5.74764	-1.87985	1.11e-16	6.57e-16	Down-regulated Gene
LGI3	9.57001	2.63975	-1.85812	7.28e-22	2.13e-20	Down-regulated Gene										IGFBPL1	4.29808	1.17743	-1.86805	2.08e-13	8.76e-13	Down-regulated Gene
LRRTM1	1.23364	0.340662	-1.85651	3.33e-11	1.6e-10	Down-regulated Gene										SLC27A4	29.1093	7.97998	-1.86702	1.21e-18	8.87e-18	Down-regulated Gene
INHBC	0.3021	0.083708	-1.85159	3.67e-17	4.39e-16	Down-regulated Gene										DIRAS2	0.997065	0.273612	-1.86555	8.12e-21	7.63e-20	Down-regulated Gene
FHL1	70.7513	19.6178	-1.85059	5.49e-28	7.89e-26	Down-regulated Gene										EMID1	15.5137	4.27211	-1.86052	1.52e-06	3.26e-06	Down-regulated Gene
EMID1	15.5137	4.31323	-1.84671	3.08e-06	7.66e-06	Down-regulated Gene										GPR37L1	0.161378	0.0447412	-1.85077	1.21e-08	3.23e-08	Down-regulated Gene
CECR2	0.28091	0.0784772	-1.83976	2.66e-12	1.48e-11	Down-regulated Gene										PGF	28.5663	7.95301	-1.84474	2.97e-20	2.61e-19	Down-regulated Gene
TNN	0.904746	0.254338	-1.83077	1.61e-10	7.03e-10	Down-regulated Gene										HSPB7	7.76115	2.16082	-1.84469	1.71e-09	4.93e-09	Down-regulated Gene
KCNJ13	1.40908	0.397775	-1.82473	5.87e-09	2.09e-08	Down-regulated Gene										BTBD11	7.74435	2.16109	-1.84138	6.77e-32	2.39e-30	Down-regulated Gene
SYT9	0.3481	0.0986207	-1.81954	5.07e-18	7.02e-17	Down-regulated Gene										PKHD1L1	8.20768	2.29453	-1.83878	3.27e-10	1.02e-09	Down-regulated Gene
PPARGC1A	4.70383	1.34279	-1.8086	6.69e-20	1.31e-18	Down-regulated Gene										CTNND2	0.323032	0.0904333	-1.83675	0.00195916	0.00300238	Down-regulated Gene
FGF12	1.58413	0.453037	-1.80599	3.19e-20	6.62e-19	Down-regulated Gene										NOL4	0.403082	0.114002	-1.82201	4.43e-06	9.06e-06	Down-regulated Gene
DMBX1	0.427419	1.49023	1.80181	1.37e-20	3.07e-19	Up-regulated Gene										RAG1	0.736065	0.209676	-1.81167	1.06e-11	3.82e-11	Down-regulated Gene
GPR25	0.0342071	0.119539	1.80511	2.91e-14	2.16e-13	Up-regulated Gene										DUOXA2	34.6249	9.86867	-1.81088	5.43e-24	7.44e-23	Down-regulated Gene
SLAMF7	0.495065	1.73056	1.80555	8.53e-19	1.34e-17	Up-regulated Gene										PRIMA1	0.691914	0.197475	-1.80892	2.2e-10	6.97e-10	Down-regulated Gene
SIRPG	0.162467	0.568109	1.80602	4.26e-20	8.61e-19	Up-regulated Gene										C19orf81	0.79093	0.226652	-1.80307	6.07e-07	1.36e-06	Down-regulated Gene
HLA-DQB1	13.0945	45.9044	1.80966	5.16e-24	2.4e-22	Up-regulated Gene										RIMKLA	0.424718	0.121852	-1.80137	3.11e-21	3.08e-20	Down-regulated Gene
ADAM12	0.181136	0.636685	1.81351	1.29e-12	7.47e-12	Up-regulated Gene										FOXA3	0.066502	0.231634	1.80038	2.78e-16	1.58e-15	Up-regulated Gene
CCL24	0.0764374	0.268763	1.81398	6.54e-13	3.96e-12	Up-regulated Gene										ICAM1	11.7033	40.7871	1.8012	4.41e-35	2.42e-33	Up-regulated Gene
CHRNA1	0.0329476	0.116035	1.81631	8.05e-12	4.2e-11	Up-regulated Gene										IL6	1.01715	3.54831	1.8026	4.36e-19	3.37e-18	Up-regulated Gene
[truncated: 677 more rows]

## Sheet: S5
Table S5 Functional and pathway enrichment analyses（Gene Ontology and Kyoto Encyclopedia of Genes and Genomes）of Differentially expressed gene（Up-related Genes and Down-related Genes）
[truncated: 1,209 more rows]

[truncated: 2 more sheets: S6, S7]
